# Supplementary material
Source: MDPI journal article supplement (https://www.mdpi.com/2673-5636/5/2/11)
Supplement: s1 [file s1]

Supplemental Information Table S3: Top 100 lists for all surveyed populations

| All Public (n=11,897 votes cast for top 100) |                            |         | AZA Members (n=13,297 votes cast for top 100) |                             |         |
|----------------------------------------------|----------------------------|---------|-----------------------------------------------|-----------------------------|---------|
| Rank                                         | Animal Name                | % Votes | Rank                                          | Animal Name                 | % Votes |
| 1                                            | Carnivora, Lion            | 6.94%   | 1                                             | Artiodactyla, Giraffe       | 3.61%   |
| 2                                            | Carnivora, Tiger           | 6.93%   | 2                                             | Carnivora, Tiger            | 3.11%   |
| 3                                            | Proboscidea, Elephant      | 6.55%   | 3                                             | Primates, Gorilla           | 2.47%   |
| 4                                            | Artiodactyla, Giraffe      | 4.93%   | 4                                             | Carnivora, Bear Polar       | 2.46%   |
| 5                                            | Primates, Monkey           | 4.77%   | 5                                             | Carnivora, Lion             | 2.43%   |
| 6                                            | Carnivora, Bear            | 3.27%   | 6                                             | Primates, Orangutan         | 2.37%   |
| 7                                            | Carnivora, Panda Giant     | 2.96%   | 7                                             | Proboscidea, Elephant       | 2.26%   |
| 8                                            | Perissodactyla, Zebra      | 2.91%   | 8                                             | Perissodactyla, Zebra       | 2.15%   |
| 9                                            | Carnivora, Bear Polar      | 2.74%   | 9                                             | Invertebrate, Coral         | 2.05%   |
| 10                                           | Cetacea, Dolphin           | 2.55%   | 10                                            | Aves, Penguin               | 1.95%   |
| 11                                           | Primates, Gorilla          | 2.46%   | 11                                            | Primates, Lemur             | 1.87%   |
| 12                                           | Chondrichthyes, Shark      | 2.38%   | 12                                            | Carnivora, Panda Red        | 1.84%   |
| 13                                           | Cetacea, Whale             | 2.19%   | 13                                            | Chondrichthyes, Shark       | 1.77%   |
| 14                                           | Artiodactyla, Hippopotamus | 1.91%   | 14                                            | Artiodactyla, Hippopotamus  | 1.67%   |
| 15                                           | Aves, Pelican              | 1.70%   | 15                                            | Carnivora, Bear             | 1.51%   |
| 16                                           | Aves, Eagle Bald           | 1.69%   | 16                                            | Carnivora, Leopard Snow     | 1.47%   |
| 17                                           | Chelonia, Turtle           | 1.40%   | 17                                            | Carnivora, Dog African Wild | 1.44%   |
| 18                                           | Carnivora, Seal            | 1.29%   | 18                                            | Primates, Chimpanzee        | 1.39%   |
| 19                                           | Carnivora, Cheetah         | 1.21%   | 19                                            | Carnivora, Cheetah          | 1.38%   |
| 20                                           | Crocodylia, Alligator      | 1.21%   | 20                                            | Crocodylia, Crocodile       | 1.38%   |
| 21                                           | Marsupialia, Koala         | 1.20%   | 21                                            | Artiodactyla, Okapi         | 1.38%   |
| 22                                           | Carnivora, Leopard         | 1.12%   | 22                                            | Chelonia, Turtle Sea        | 1.33%   |
| 23                                           | Invertebrate, Butterfly    | 1.05%   | 23                                            | Xenarthra, Pangolin         | 1.27%   |
| 24                                           | Aves, Penguin              | 1.03%   | 24                                            | Xenarthra, Sloth            | 1.25%   |
| 25                                           | Carnivora, Dog Domestic    | 0.93%   | 25                                            | Carnivora, Jaguar           | 1.25%   |
| 26                                           | Marsupialia, Kangaroo      | 0.93%   | 26                                            | Marsupialia, Koala          | 1.22%   |
| 27                                           | Primates, Ape              | 0.89%   | 27                                            | Xenarthra, Anteater         | 1.20%   |
| 28                                           | Carnivora, Otter           | 0.87%   | 28                                            | Squamata, Dragon Komodo     | 1.20%   |
| 29                                           | Perissodactyla, Horse      | 0.86%   | 29                                            | Aves, Flamingo              | 1.16%   |
| 30                                           | Carnivora, Wolf Gray       | 0.85%   | 30                                            | Carnivora, Sea Lion         | 1.11%   |
| 31                                           | Carnivora, Puma            | 0.84%   | 31                                            | Perissodactyla, Tapir       | 1.09%   |
| 32                                           | Artiodactyla, Deer         | 0.82%   | 32                                            | Carnivora, Wolf             | 1.04%   |
| 33                                           | Aves, Flamingo             | 0.81%   | 33                                            | Aves, Vulture               | 1.02%   |
| 34                                           | Xenarthra, Sloth           | 0.77%   | 34                                            | Invertebrate, Butterfly     | 0.98%   |
| 35                                           | Sirenia, Manatee           | 0.75%   | 35                                            | Carnivora, Otter            | 0.97%   |
| 36                                           | Crocodylia, Crocodile      | 0.74%   | 36                                            | Artiodactyla, Bison         | 0.96%   |
| 37                                           | Invertebrate, Octopus      | 0.74%   | 37                                            | Primates, Gibbon            | 0.94%   |
| 38                                           | Primates, Chimpanzee       | 0.74%   | 38                                            | Carnivora, Leopard          | 0.93%   |
| 39                                           | Primates, Orangutan        | 0.69%   | 39                                            | Crocodylia, Alligator       | 0.91%   |
| 40                                           | Artiodactyla, Camel        | 0.64%   | 40                                            | Marsupialia, Kangaroo       | 0.88%   |
| 41                                           | Chondrichthyes, Stingray   | 0.61%   | 41                                            | Carnivora, Hyena            | 0.83%   |
| 42                                           | Primates, Lemur            | 0.56%   | 42                                            | Artiodactyla, Bongo         | 0.83%   |
| 43                                           | Carnivora, Sea Lion        | 0.55%   | 43                                            | Aves, Ostrich               | 0.81%   |

|    |                                   |       |    |                                  |       |
|----|-----------------------------------|-------|----|----------------------------------|-------|
| 44 | Carnivora, Leopard Snow           | 0.54% | 44 | Aves, Hornbill                   | 0.81% |
| 45 | Chelonia, Turtle Sea              | 0.54% | 45 | Proboscidea, Elephant Asian      | 0.80% |
| 46 | Artiodactyla, Bison               | 0.50% | 46 | Proboscidea, Elephant African    | 0.78% |
| 47 | Artiodactyla, Goat                | 0.50% | 47 | Invertebrate, Octopus            | 0.77% |
| 48 | Carnivora, Bear Grizzly           | 0.50% | 48 | Carnivora, Meerkat               | 0.77% |
| 49 | Carnivora, Fox                    | 0.50% | 49 | Carnivora, Puma                  | 0.75% |
| 50 | Reptilia, Reptile                 | 0.49% | 50 | Aves, Crane                      | 0.74% |
| 51 | Invertebrate, Coral               | 0.48% | 51 | Chelonia, Tortoise Galapagos     | 0.74% |
| 52 | Artiodactyla, Sheep               | 0.47% | 52 | Carnivora, Panda Giant           | 0.74% |
| 53 | Aves, Ostrich                     | 0.47% | 53 | Chelonia, Tortoise               | 0.74% |
| 54 | Carnivora, Jaguar                 | 0.47% | 54 | Primates, Bonobo                 | 0.74% |
| 55 | Aves, Peafowl                     | 0.46% | 55 | Carnivora, Leopard Amur          | 0.74% |
| 56 | Invertebrate, Bee                 | 0.46% | 56 | Cetacea, Dolphin                 | 0.71% |
| 57 | Cetacea, Whale Killer             | 0.45% | 57 | Perissodactyla, Rhinoceros Black | 0.71% |
| 58 | Squamata, Lizard                  | 0.45% | 58 | Carnivora, Walrus                | 0.69% |
| 59 | Artiodactyla, Deer Moose          | 0.43% | 59 | Sirenia, Manatee                 | 0.68% |
| 60 | Artiodactyla, Pig                 | 0.42% | 60 | Primates, Ape Great              | 0.68% |
| 61 | Pisces, Fish Seahorse             | 0.42% | 61 | Chelonia, Turtle                 | 0.67% |
| 62 | Carnivora, Panda Red              | 0.41% | 62 | Aves, Macaw                      | 0.65% |
| 63 | Aves, Hawk                        | 0.37% | 63 | Amphibia, Frog Poison Dart       | 0.65% |
| 64 | Carnivora, Coyote                 | 0.37% | 64 | Carnivora, Seal                  | 0.65% |
| 65 | Aves, Chicken                     | 0.36% | 65 | Aves, Eagle Bald                 | 0.64% |
| 66 | Artiodactyla, Elk                 | 0.34% | 66 | Perissodactyla, Rhinoceros White | 0.64% |
| 67 | Artiodactyla, Gazelle             | 0.34% | 67 | Carnivora, Otter Sea             | 0.63% |
| 68 | Carnivora, Hyena                  | 0.33% | 68 | Primates, Tamarin                | 0.62% |
| 69 | Invertebrate, Butterfly Monarch   | 0.33% | 69 | Rodentia, Capybara               | 0.61% |
| 70 | Carnivora, Meerkat                | 0.32% | 70 | Aves, Ratite Cassowary           | 0.60% |
| 71 | Invertebrate, Starfish            | 0.32% | 71 | Carnivora, Leopard Clouded       | 0.59% |
| 72 | Pisces, Fish Clown                | 0.32% | 72 | Artiodactyla, Warthog            | 0.58% |
| 73 | Artiodactyla, Antelope            | 0.31% | 73 | Carnivora, Wolf Maned            | 0.58% |
| 74 | Chelonia, Tortoise                | 0.31% | 74 | Carnivora, Fossa                 | 0.57% |
| 75 | Chiroptera, Bat                   | 0.31% | 75 | Carnivora, Panda                 | 0.57% |
| 76 | Carnivora, Bear Black             | 0.30% | 76 | Aves, Toucan                     | 0.56% |
| 77 | Aves, Bird Rainforest             | 0.29% | 77 | Marsupialia, Devil Tasmanian     | 0.56% |
| 78 | Carnivora, Walrus                 | 0.29% | 78 | Artiodactyla, Moose              | 0.56% |
| 79 | Rodentia, Beaver                  | 0.29% | 79 | Aves, Eagle                      | 0.56% |
| 80 | Aves, Toucan                      | 0.29% | 80 | Carnivora, Bear Sloth            | 0.56% |
| 81 | Aves, Hummingbird                 | 0.25% | 81 | Carnivora, Bear Black            | 0.55% |
| 82 | Carnivora, Raccoon                | 0.25% | 82 | Carnivora, Bear Sun              | 0.55% |
| 83 | Chondrichthyes, Shark Great White | 0.25% | 83 | Carnivora, Ferret Black Footed   | 0.55% |
| 84 | Artiodactyla, Llama               | 0.24% | 84 | Monotremata, Platypus            | 0.54% |
| 85 | Pisces, Fish Eel                  | 0.24% | 85 | Pisces, Fish Seahorse            | 0.53% |
| 86 | Xenarthra, Anteater               | 0.24% | 86 | Artiodactyla, Antelope           | 0.51% |
| 87 | Perissodactyla, Donkey            | 0.22% | 87 | Chondrichthyes, Ray              | 0.50% |
| 88 | Aves, Emu                         | 0.21% | 88 | Marsupialia, Wombat              | 0.50% |
| 89 | Monotremata, Platypus             | 0.21% | 89 | Carnivora, Wolf Red              | 0.49% |

|     |                                  |       |     |                                       |       |
|-----|----------------------------------|-------|-----|---------------------------------------|-------|
| 90  | Perissodactyla, Rhinoceros White | 0.21% | 90  | Squamata, Lizard                      | 0.48% |
| 91  | Aves, Duck                       | 0.20% | 91  | Carnivora, Otter River                | 0.47% |
| 92  | Carnivora, Bear Brown            | 0.20% | 92  | Aves, Condor California               | 0.47% |
| 93  | Rodentia, Dog Prairie            | 0.20% | 93  | Cetacea, Whale Beluga                 | 0.47% |
| 94  | Proboscidea, Elephant African    | 0.19% | 94  | Perissodactyla, Rhinoceros Indian     | 0.47% |
| 95  | Carnivora, Binturong             | 0.19% | 95  | Invertebrate, Bee                     | 0.46% |
| 96  | Carnivora, Otter Sea             | 0.19% | 96  | Artiodactyla, Hog Red River           | 0.46% |
| 97  | Carnivora, Tiger Amur            | 0.19% | 97  | Amphibia, Salamander                  | 0.45% |
| 98  | Invertebrate, Lobster            | 0.18% | 98  | Amphibia, Hellbender                  | 0.45% |
| 99  | Cetacea, Whale Blue              | 0.18% | 99  | Carnivora, Lion African               | 0.45% |
| 100 | Pisces, Fish Tuna                | 0.18% | 100 | Marsupialia, Kangaroo Tree Matschie's | 0.45% |
|     |                                  |       | 101 | Primates, Siamang                     | 0.45% |

| AZA Directors (n=1,915 votes cast for top 100) |                             |         | All Surveys Combined (n=25,603 votes cast for top 100) |                            |         |
|------------------------------------------------|-----------------------------|---------|--------------------------------------------------------|----------------------------|---------|
| Rank                                           | Animal Name                 | % Votes | Rank                                                   | Animal Name                | % Votes |
| 1                                              | Artiodactyla, Giraffe       | 3.45%   | 1                                                      | Carnivora, Tiger           | 5.01%   |
| 2                                              | Carnivora, Lion             | 2.77%   | 2                                                      | Carnivora, Lion            | 4.69%   |
| 3                                              | Proboscidea, Elephant       | 2.77%   | 4                                                      | Proboscidea, Elephant      | 4.42%   |
| 4                                              | Carnivora, Tiger            | 2.30%   | 3                                                      | Artiodactyla, Giraffe      | 4.42%   |
| 5                                              | Aves, Penguin               | 2.19%   | 5                                                      | Carnivora, Bear Polar      | 2.66%   |
| 6                                              | Primates, Gorilla           | 1.98%   | 6                                                      | Perissodactyla, Zebra      | 2.62%   |
| 7                                              | Perissodactyla, Zebra       | 1.98%   | 7                                                      | Primates, Gorilla          | 2.58%   |
| 8                                              | Chondrichthyes, Shark       | 1.93%   | 8                                                      | Carnivora, Bear            | 2.39%   |
| 9                                              | Artiodactyla, Hippopotamus  | 1.93%   | 9                                                      | Primates, Monkey           | 2.38%   |
| 10                                             | Carnivora, Panda Red        | 1.72%   | 10                                                     | Chondrichthyes, Shark      | 2.17%   |
| 11                                             | Carnivora, Jaguar           | 1.57%   | 11                                                     | Artiodactyla, Hippopotamus | 1.90%   |
| 12                                             | Carnivora, Bear Polar       | 1.51%   | 12                                                     | Carnivora, Panda Giant     | 1.80%   |
| 13                                             | Primates, Chimpanzee        | 1.51%   | 13                                                     | Aves, Penguin              | 1.65%   |
| 14                                             | Carnivora, Cheetah          | 1.51%   | 14                                                     | Primates, Orangutan        | 1.65%   |
| 15                                             | Invertebrate, Coral         | 1.41%   | 15                                                     | Cetacea, Dolphin           | 1.60%   |
| 16                                             | Marsupialia, Koala          | 1.36%   | 16                                                     | Carnivora, Cheetah         | 1.39%   |
| 17                                             | Primates, Orangutan         | 1.31%   | 17                                                     | Invertebrate, Coral        | 1.39%   |
| 18                                             | Artiodactyla, Okapi         | 1.31%   | 18                                                     | Primates, Lemur            | 1.31%   |
| 19                                             | Carnivora, Otter River      | 1.31%   | 19                                                     | Marsupialia, Koala         | 1.29%   |
| 20                                             | Aves, Flamingo              | 1.25%   | 20                                                     | Carnivora, Panda Red       | 1.27%   |
| 21                                             | Carnivora, Dog African Wild | 1.20%   | 22                                                     | Cetacea, Whale             | 1.21%   |
| 22                                             | Xenarthra, Sloth            | 1.20%   | 21                                                     | Primates, Chimpanzee       | 1.18%   |
| 23                                             | Artiodactyla, Bison         | 1.15%   | 23                                                     | Aves, Eagle Bald           | 1.17%   |
| 24                                             | Primates, Lemur             | 1.10%   | 24                                                     | Crocodylia, Crocodile      | 1.11%   |
| 25                                             | Carnivora, Bear             | 1.10%   | 25                                                     | Crocodylia, Alligator      | 1.10%   |
| 26                                             | Carnivora, Leopard Snow     | 1.10%   | 26                                                     | Carnivora, Leopard Snow    | 1.10%   |
| 27                                             | Chelonia, Turtle Sea        | 1.10%   | 27                                                     | Xenarthra, Sloth           | 1.10%   |
| 28                                             | Perissodactyla, Tapir       | 1.10%   | 28                                                     | Aves, Flamingo             | 1.07%   |
| 29                                             | Pisces, Fish Seahorse       | 1.10%   | 29                                                     | Carnivora, Leopard         | 1.07%   |
| 30                                             | Carnivora, Sea Lion         | 1.04%   | 30                                                     | Invertebrate, Butterfly    | 1.05%   |

|    |                                  |       |    |                                  |       |
|----|----------------------------------|-------|----|----------------------------------|-------|
| 31 | Squamata, Dragon Komodo          | 0.99% | 31 | Chelonia, Turtle                 | 1.03% |
| 32 | Primates, Gibbon                 | 0.99% | 32 | Chelonia, Turtle Sea             | 1.02% |
| 33 | Invertebrate, Octopus            | 0.99% | 33 | Carnivora, Jaguar                | 0.98% |
| 34 | Aves, Crane                      | 0.99% | 34 | Aves, Pelican                    | 0.98% |
| 35 | Rodentia, Capybara               | 0.99% | 35 | Carnivora, Seal                  | 0.97% |
| 36 | Primates, New World              | 0.99% | 36 | Carnivora, Otter                 | 0.96% |
| 37 | Aves, Hornbill                   | 0.94% | 37 | Marsupialia, Kangaroo            | 0.95% |
| 38 | Primates, Ape Great              | 0.94% | 38 | Carnivora, Sea Lion              | 0.91% |
| 39 | Aves, Raptor                     | 0.94% | 39 | Carnivora, Dog African Wild      | 0.88% |
| 40 | Carnivora, Leopard               | 0.89% | 40 | Artiodactyla, Okapi              | 0.87% |
| 41 | Crocodylia, Alligator            | 0.89% | 41 | Carnivora, Puma                  | 0.83% |
| 42 | Aves, Vulture                    | 0.84% | 42 | Artiodactyla, Bison              | 0.82% |
| 43 | Proboscidea, Elephant African    | 0.84% | 43 | Invertebrate, Octopus            | 0.82% |
| 44 | Chiroptera, Bat                  | 0.84% | 44 | Xenarthra, Anteater              | 0.78% |
| 45 | Invertebrate, Butterfly          | 0.78% | 45 | Squamata, Dragon Komodo          | 0.75% |
| 46 | Marsupialia, Kangaroo            | 0.78% | 46 | Sirenia, Manatee                 | 0.75% |
| 47 | Carnivora, Hyena                 | 0.78% | 47 | Xenarthra, Pangolin              | 0.74% |
| 48 | Artiodactyla, Bongo              | 0.78% | 48 | Perissodactyla, Tapir            | 0.70% |
| 49 | Carnivora, Meerkat               | 0.78% | 49 | Aves, Ostrich                    | 0.69% |
| 50 | Aves, Toucan                     | 0.78% | 50 | Carnivora, Hyena                 | 0.64% |
| 51 | Amphibia, Frog Poison Dart       | 0.73% | 51 | Aves, Vulture                    | 0.62% |
| 52 | Aves, Eagle Bald                 | 0.73% | 52 | Carnivora, Meerkat               | 0.61% |
| 53 | Artiodactyla, Warthog            | 0.73% | 53 | Carnivora, Wolf Gray             | 0.60% |
| 54 | Carnivora, Bear Grizzly          | 0.73% | 55 | Primates, Ape                    | 0.58% |
| 55 | Primates, Old World              | 0.73% | 54 | Primates, Gibbon                 | 0.58% |
| 56 | Chondrichthyes, Ray              | 0.68% | 57 | Artiodactyla, Camel              | 0.57% |
| 57 | Aves, Kookaburra                 | 0.68% | 56 | Chelonia, Tortoise               | 0.57% |
| 58 | Xenarthra, Pangolin              | 0.63% | 58 | Proboscidea, Elephant African    | 0.56% |
| 59 | Carnivora, Otter                 | 0.63% | 59 | Pisces, Fish Seahorse            | 0.55% |
| 60 | Aves, Ostrich                    | 0.63% | 60 | Carnivora, Wolf                  | 0.54% |
| 61 | Proboscidea, Elephant Asian      | 0.63% | 62 | Artiodactyla, Deer               | 0.53% |
| 62 | Carnivora, Puma                  | 0.63% | 61 | Proboscidea, Elephant Asian      | 0.53% |
| 63 | Chelonia, Tortoise Galapagos     | 0.63% | 63 | Carnivora, Walrus                | 0.53% |
| 64 | Cetacea, Dolphin                 | 0.63% | 64 | Aves, Hornbill                   | 0.50% |
| 65 | Sirenia, Manatee                 | 0.63% | 65 | Artiodactyla, Bongo              | 0.49% |
| 66 | Perissodactyla, Rhinoceros White | 0.63% | 66 | Aves, Crane                      | 0.49% |
| 67 | Artiodactyla, Camel              | 0.63% | 67 | Carnivora, Bear Grizzly          | 0.49% |
| 68 | Artiodactyla, Takin              | 0.63% | 68 | Squamata, Lizard                 | 0.48% |
| 69 | Squamata, Rattlesnake            | 0.63% | 69 | Aves, Toucan                     | 0.48% |
| 70 | Carnivora, Binturong             | 0.63% | 79 | Chondrichthyes, Stingray         | 0.48% |
| 71 | Primates, Orangutan Sumatran     | 0.63% | 72 | Invertebrate, Bee                | 0.48% |
| 72 | Artiodactyla, Duiker Zebra       | 0.63% | 70 | Perissodactyla, Rhinoceros Black | 0.48% |
| 73 | Crocodylia, Crocodile            | 0.57% | 71 | Perissodactyla, Rhinoceros White | 0.48% |
| 74 | Carnivora, Panda Giant           | 0.57% | 73 | Primates, Ape Great              | 0.46% |
| 75 | Artiodactyla, Antelope           | 0.57% | 74 | Carnivora, Dog Domestic          | 0.46% |
| 76 | Rodentia, Porcupine              | 0.57% | 76 | Artiodactyla, Antelope           | 0.45% |

|     |                                  |       |  |     |                                |       |
|-----|----------------------------------|-------|--|-----|--------------------------------|-------|
| 77  | Xenarthra, Armadillo             | 0.57% |  | 75  | Chelonia, Tortoise Galapagos   | 0.45% |
| 78  | Chelonia, Tortoise Large         | 0.57% |  | 77  | Aves, Macaw                    | 0.45% |
| 79  | Xenarthra, Anteater              | 0.52% |  | 78  | Perissodactyla, Horse          | 0.45% |
| 80  | Chelonia, Tortoise               | 0.52% |  | 80  | Carnivora, Bear Black          | 0.44% |
| 81  | Perissodactyla, Rhinoceros Black | 0.52% |  | 81  | Chiroptera, Bat                | 0.44% |
| 82  | Primates, Tamarin                | 0.52% |  | 89  | Reptilia, Reptile              | 0.44% |
| 83  | Carnivora, Panda                 | 0.52% |  | 82  | Primates, Bonobo               | 0.43% |
| 84  | Carnivora, Bear Sloth            | 0.52% |  | 83  | Carnivora, Otter Sea           | 0.43% |
| 85  | Carnivora, Ferret Black Footed   | 0.52% |  | 84  | Carnivora, Fox                 | 0.43% |
| 86  | Aves, Stork                      | 0.52% |  | 86  | Amphibia, Frog Poison Dart     | 0.42% |
| 87  | Xenarthra, Anteater Giant        | 0.52% |  | 85  | Carnivora, Leopard Amur        | 0.42% |
| 88  | Aves, Macaw                      | 0.47% |  | 87  | Rodentia, Capybara             | 0.42% |
| 89  | Carnivora, Seal                  | 0.47% |  | 88  | Cetacea, Whale Killer          | 0.41% |
| 90  | Carnivora, Leopard Clouded       | 0.47% |  | 90  | Monotremata, Platypus          | 0.40% |
| 91  | Aves, Condor California          | 0.47% |  | 91  | Artiodactyla, Warthog          | 0.38% |
| 92  | Artiodactyla, Hog Red River      | 0.47% |  | 93  | Carnivora, Otter River         | 0.37% |
| 93  | Primates, Siamang                | 0.47% |  | 92  | Primates, Tamarin              | 0.37% |
| 94  | Carnivora, Cat Small             | 0.47% |  | 94  | Artiodactyla, Gazelle          | 0.36% |
| 95  | Carnivora, Wolf Gray             | 0.47% |  | 95  | Carnivora, Leopard Clouded     | 0.36% |
| 96  | Primates, Marmoset               | 0.47% |  | 96  | Chondrichthyes, Ray            | 0.36% |
| 97  | Primates, Lemur Ring-Tailed      | 0.47% |  | 98  | Aves, Bird Rainforest          | 0.35% |
| 98  | Primates, Mandrill               | 0.47% |  | 97  | Carnivora, Ferret Black Footed | 0.35% |
| 99  | Carnivora, Walrus                | 0.42% |  | 99  | Carnivora, Wolf Maned          | 0.34% |
| 100 | Chelonia, Turtle                 | 0.42% |  | 100 | Aves, Ratite Cassowary         | 0.34% |
| 101 | Carnivora, Wolf Red              | 0.42% |  |     |                                |       |
| 102 | Carnivora, Ocelot                | 0.42% |  |     |                                |       |
| 103 | Carnivora, Tiger Amur            | 0.42% |  |     |                                |       |
| 104 | Perissodactyla, Horse Przewalski | 0.42% |  |     |                                |       |
| 105 | Carnivora, Serval                | 0.42% |  |     |                                |       |
| 106 | Reptilia, Reptile                | 0.42% |  |     |                                |       |
| 107 | Chondrichthyes, Stingray         | 0.42% |  |     |                                |       |
| 108 | Cetacea, Whale                   | 0.42% |  |     |                                |       |
| 109 | Squamata, Boa Constrictor        | 0.42% |  |     |                                |       |
| 110 | Chelonia, Turtle Freshwater      | 0.42% |  |     |                                |       |
| 111 | Crocodylia, Crocodylia           | 0.42% |  |     |                                |       |
| 112 | Aves, Hornbill Ground            | 0.42% |  |     |                                |       |
| 113 | Artiodactyla, Deer Moose         | 0.42% |  |     |                                |       |
