# Supplementary material
Source: MDPI journal article supplement (https://www.mdpi.com/2673-5636/5/2/11)
Supplement: s1 [file s1]

**Supplementary Material Table S4: Full lists of animals voted for by all surveyed populations**

| <b>All Public (n=13,812 votes cast)</b> |                            |                    |
|-----------------------------------------|----------------------------|--------------------|
| <b>Rank</b>                             | <b>Animal Name</b>         | <b>%<br/>Votes</b> |
| 1                                       | Carnivora, Lion            | 5.98%              |
| 2                                       | Carnivora, Tiger           | 5.97%              |
| 3                                       | Proboscidea, Elephant      | 5.64%              |
| 4                                       | Artiodactyla, Giraffe      | 4.24%              |
| 5                                       | Primates, Monkey           | 4.11%              |
| 6                                       | Carnivora, Bear            | 2.82%              |
| 7                                       | Carnivora, Panda Giant     | 2.55%              |
| 8                                       | Perissodactyla, Zebra      | 2.51%              |
| 9                                       | Carnivora, Bear Polar      | 2.36%              |
| 10                                      | Cetacea, Dolphin           | 2.19%              |
| 11                                      | Primates, Gorilla          | 2.12%              |
| 12                                      | Chondrichthyes, Shark      | 2.05%              |
| 13                                      | Cetacea, Whale             | 1.89%              |
| 14                                      | Artiodactyla, Hippopotamus | 1.64%              |
| 15                                      | Aves, Pelican              | 1.46%              |
| 16                                      | Aves, Eagle Bald           | 1.46%              |
| 17                                      | Chelonia, Turtle           | 1.20%              |
| 18                                      | Carnivora, Seal            | 1.11%              |
| 19                                      | Carnivora, Cheetah         | 1.04%              |
| 20                                      | Crocodylia, Alligator      | 1.04%              |
| 21                                      | Marsupialia, Koala         | 1.04%              |
| 22                                      | Carnivora, Leopard         | 0.96%              |
| 23                                      | Invertebrate, Butterfly    | 0.91%              |
| 24                                      | Aves, Penguin              | 0.88%              |
| 25                                      | Carnivora, Dog Domestic    | 0.80%              |
| 26                                      | Marsupialia, Kangaroo      | 0.80%              |
| 27                                      | Primates, Ape              | 0.77%              |
| 28                                      | Carnivora, Otter           | 0.75%              |
| 29                                      | Perissodactyla, Horse      | 0.74%              |
| 30                                      | Carnivora, Wolf Gray       | 0.73%              |
| 31                                      | Carnivora, Puma            | 0.72%              |
| 32                                      | Artiodactyla, Deer         | 0.71%              |
| 33                                      | Aves, Flamingo             | 0.70%              |
| 34                                      | Xenarthra, Sloth           | 0.67%              |
| 35                                      | Sirenia, Manatee           | 0.64%              |
| 36                                      | Crocodylia, Crocodile      | 0.64%              |
| 37                                      | Invertebrate, Octopus      | 0.64%              |
| 38                                      | Primates, Chimpanzee       | 0.64%              |
| 39                                      | Primates, Orangutan        | 0.59%              |
| 40                                      | Artiodactyla, Camel        | 0.55%              |
| 41                                      | Chondrichthyes, Stingray   | 0.52%              |
| 42                                      | Primates, Lemur            | 0.49%              |
| 43                                      | Carnivora, Sea Lion        | 0.48%              |
| 44                                      | Carnivora, Leopard Snow    | 0.46%              |

|    |                                   |       |
|----|-----------------------------------|-------|
| 45 | Chelonia, Turtle Sea              | 0.46% |
| 46 | Artiodactyla, Bison               | 0.43% |
| 47 | Artiodactyla, Goat                | 0.43% |
| 48 | Carnivora, Bear Grizzly           | 0.43% |
| 49 | Carnivora, Fox                    | 0.43% |
| 50 | Reptilia, Reptile                 | 0.42% |
| 51 | Invertebrate, Coral               | 0.41% |
| 52 | Artiodactyla, Sheep               | 0.41% |
| 53 | Aves, Ostrich                     | 0.41% |
| 54 | Carnivora, Jaguar                 | 0.41% |
| 55 | Aves, Peafowl                     | 0.40% |
| 56 | Invertebrate, Bee                 | 0.40% |
| 57 | Cetacea, Whale Killer             | 0.39% |
| 58 | Squamata, Lizard                  | 0.39% |
| 59 | Artiodactyla, Deer Moose          | 0.37% |
| 60 | Artiodactyla, Pig                 | 0.36% |
| 61 | Pisces, Fish Seahorse             | 0.36% |
| 62 | Carnivora, Panda Red              | 0.35% |
| 63 | Aves, Hawk                        | 0.32% |
| 64 | Carnivora, Coyote                 | 0.32% |
| 65 | Aves, Chicken                     | 0.31% |
| 66 | Artiodactyla, Elk                 | 0.30% |
| 67 | Artiodactyla, Gazelle             | 0.29% |
| 68 | Carnivora, Hyena                  | 0.28% |
| 69 | Invertebrate, Butterfly Monarch   | 0.28% |
| 70 | Carnivora, Meerkat                | 0.28% |
| 71 | Invertebrate, Starfish            | 0.28% |
| 72 | Pisces, Fish Clown                | 0.28% |
| 73 | Artiodactyla, Antelope            | 0.27% |
| 74 | Chelonia, Tortoise                | 0.27% |
| 75 | Chiroptera, Bat                   | 0.27% |
| 76 | Carnivora, Bear Black             | 0.26% |
| 77 | Aves, Bird Rainforest             | 0.25% |
| 78 | Carnivora, Walrus                 | 0.25% |
| 79 | Rodentia, Beaver                  | 0.25% |
| 80 | Aves, Toucan                      | 0.25% |
| 81 | Aves, Hummingbird                 | 0.22% |
| 82 | Carnivora, Raccoon                | 0.22% |
| 83 | Chondrichthyes, Shark Great White | 0.22% |
| 84 | Artiodactyla, Llama               | 0.21% |
| 85 | Pisces, Fish Eel                  | 0.21% |
| 86 | Xenarthra, Anteater               | 0.21% |
| 87 | Perissodactyla, Donkey            | 0.19% |
| 88 | Aves, Emu                         | 0.18% |
| 89 | Monotremata, Platypus             | 0.18% |
| 90 | Perissodactyla, Rhinoceros White  | 0.18% |
| 91 | Aves, Duck                        | 0.17% |
| 92 | Carnivora, Bear Brown             | 0.17% |

|     |                                  |       |
|-----|----------------------------------|-------|
| 93  | Rodentia, Dog Prairie            | 0.17% |
| 94  | Proboscidea, Elephant African    | 0.17% |
| 95  | Carnivora, Binturong             | 0.17% |
| 96  | Carnivora, Otter Sea             | 0.17% |
| 97  | Carnivora, Tiger Amur            | 0.17% |
| 98  | Invertebrate, Lobster            | 0.16% |
| 99  | Cetacea, Whale Blue              | 0.15% |
| 100 | Pisces, Fish Tuna                | 0.15% |
| 101 | Aves, Condor                     | 0.14% |
| 102 | Aves, Bird Exotic                | 0.14% |
| 103 | Aves, Macaw                      | 0.14% |
| 104 | Carnivora, Tiger Bengal          | 0.14% |
| 105 | Mammalia, Mammal                 | 0.14% |
| 106 | Squamata, Rattlesnake            | 0.14% |
| 107 | Aves, Cardinals                  | 0.13% |
| 108 | Carnivora, Badger                | 0.13% |
| 109 | Perissodactyla, Rhinoceros Black | 0.13% |
| 110 | Primates, Monkey Spider          | 0.13% |
| 111 | Proboscidea, Elephant Asian      | 0.12% |
| 112 | Chondrichthyes, Ray Manta        | 0.12% |
| 113 | Aves, Turkey                     | 0.12% |
| 114 | Cetacea, Whale Beluga            | 0.12% |
| 115 | Pisces, Fish Cat                 | 0.12% |
| 116 | Pisces, Fish Salmon              | 0.12% |
| 117 | Rodentia, Squirrel               | 0.12% |
| 118 | Squamata, Boa Constrictor        | 0.12% |
| 119 | Aves, Parakeet                   | 0.11% |
| 120 | Aves, Robin                      | 0.11% |
| 121 | Invertebrate, Bee Honey          | 0.11% |
| 122 | Squamata, Dragon Komodo          | 0.11% |
| 123 | Squamata, Iguana                 | 0.11% |
| 124 | Artiodactyla, Okapi              | 0.10% |
| 125 | Aves, Geese                      | 0.10% |
| 126 | Artiodactyla, Wildebeest         | 0.09% |
| 127 | Aves, Falcon                     | 0.09% |
| 128 | Carnivora, Lynx                  | 0.09% |
| 129 | Cetacea, Narwhal                 | 0.09% |
| 130 | Chondrichthyes, Shark Hammerhead | 0.09% |
| 131 | Invertebrate, Oyster             | 0.09% |
| 132 | Squamata, Anaconda               | 0.09% |
| 133 | Xenarthra, Armadillo             | 0.09% |
| 134 | Carnivora, Dog African Wild      | 0.09% |
| 135 | Marsupialia, Marsupial           | 0.09% |
| 136 | Perissodactyla, Tapir            | 0.09% |
| 137 | Pisces, Fish Gold                | 0.09% |
| 138 | Artiodactyla, Buffalo Water      | 0.08% |
| 139 | Aves, Puffin                     | 0.08% |
| 140 | Cetacea, Whale Humpback          | 0.08% |

|     |                                |       |
|-----|--------------------------------|-------|
| 141 | Chondrichthyes, Ray            | 0.08% |
| 142 | Insectivora, Hedgehog          | 0.08% |
| 143 | Pisces, Fish Bass              | 0.08% |
| 144 | Primates, Ape Great            | 0.08% |
| 145 | Rodentia, Rat                  | 0.08% |
| 146 | Artiodactyla, Goat Mountain    | 0.07% |
| 147 | Aves, Pigeon                   | 0.07% |
| 148 | Aves, Raptor                   | 0.07% |
| 149 | Aves, Swan                     | 0.07% |
| 150 | Carnivora, Fox Red             | 0.07% |
| 151 | Invertebrate, Anemone          | 0.07% |
| 152 | Marsupialia, Opossum           | 0.07% |
| 153 | Pisces, Fish Sword             | 0.07% |
| 154 | Artiodactyla, Alpaca           | 0.07% |
| 155 | Aves, Bird Endangered          | 0.07% |
| 156 | Aves, Jays Blue                | 0.07% |
| 157 | Carnivora, Skunk               | 0.07% |
| 158 | Carnivora, Wolf Red            | 0.07% |
| 159 | Carnivora, Wolverine           | 0.07% |
| 160 | Invertebrate, Tarantula        | 0.07% |
| 161 | Rodentia, Hamster              | 0.07% |
| 162 | Rodentia, Mice                 | 0.07% |
| 163 | Rodentia, Porcupine            | 0.07% |
| 164 | Xenarthra, Pangolin            | 0.07% |
| 165 | Artiodactyla, Boar             | 0.06% |
| 166 | Artiodactyla, Reindeer         | 0.06% |
| 167 | Aves, Canary                   | 0.06% |
| 168 | Aves, Crane                    | 0.06% |
| 169 | Aves, Sparrow                  | 0.06% |
| 170 | Aves, Vulture                  | 0.06% |
| 171 | Carnivora, Bear Sun            | 0.06% |
| 172 | Carnivora, Dingo               | 0.06% |
| 173 | Carnivora, Fox Arctic          | 0.06% |
| 174 | Invertebrate, Clam             | 0.06% |
| 175 | Invertebrate, Scorpion         | 0.06% |
| 176 | Primates, Primate              | 0.06% |
| 177 | Tubulidentata, Aardvark        | 0.06% |
| 178 | Artiodactyla, Warthog          | 0.05% |
| 179 | Aves, Bluebird                 | 0.05% |
| 180 | Carnivora, Cat Domestic        | 0.05% |
| 181 | Carnivora, Ferret Black Footed | 0.05% |
| 182 | Carnivora, Otter River         | 0.05% |
| 183 | Chondrichthyes, Shark Tiger    | 0.05% |
| 184 | Chondrichthyes, Shark Whale    | 0.05% |
| 185 | Invertebrate, Dragonflies      | 0.05% |
| 186 | Marsupialia, Wallaby           | 0.05% |
| 187 | Marsupialia, Wombat            | 0.05% |
| 188 | Rodentia, Capybara             | 0.05% |

|     |                                  |       |
|-----|----------------------------------|-------|
| 189 | Rodentia, Groundhog              | 0.05% |
| 190 | Squamata, Lizard Monitor         | 0.05% |
| 191 | Amphibia, Frog Poison Dart       | 0.04% |
| 192 | Artiodactyla, Caribou            | 0.04% |
| 193 | Artiodactyla, Deer White Tailed  | 0.04% |
| 194 | Aves, Dove                       | 0.04% |
| 195 | Aves, Finch                      | 0.04% |
| 196 | Carnivora, Felids                | 0.04% |
| 197 | Carnivora, Mink                  | 0.04% |
| 198 | Insectivora, Mole                | 0.04% |
| 199 | Invertebrate, Crayfish           | 0.04% |
| 200 | Marsupialia, Glider Sugar        | 0.04% |
| 201 | Perissodactyla, Horse Przewalski | 0.04% |
| 202 | Perissodactyla, Mule             | 0.04% |
| 203 | Pisces, Fish Eel Electric        | 0.04% |
| 204 | Pisces, Fish Koi                 | 0.04% |
| 205 | Primates, Bonobo                 | 0.04% |
| 206 | Rodentia, Chipmunk               | 0.04% |
| 207 | Squamata, Chameleon              | 0.04% |
| 208 | Squamata, Gecko                  | 0.04% |
| 209 | Amphibia, Axolotl                | 0.04% |
| 210 | Artiodactyla, Kudu               | 0.04% |
| 211 | Artiodactyla, Ox                 | 0.04% |
| 212 | Artiodactyla, Ox Musk            | 0.04% |
| 213 | Artiodactyla, Yak                | 0.04% |
| 214 | Aves, Mockingbird                | 0.04% |
| 215 | Aves, Osprey                     | 0.04% |
| 216 | Aves, Quail                      | 0.04% |
| 217 | Aves, Songbird                   | 0.04% |
| 218 | Aves, Waterfowl                  | 0.04% |
| 219 | Carnivora, Ocelot                | 0.04% |
| 220 | Carnivora, Weasel                | 0.04% |
| 221 | Chelonia, Tortoise Galapagos     | 0.04% |
| 222 | Chelonia, Turtle Hawksbill       | 0.04% |
| 223 | Invertebrate, Bumblebee          | 0.04% |
| 224 | Invertebrate, Mosquito           | 0.04% |
| 225 | Marsupialia, Devil Tasmanian     | 0.04% |
| 226 | Pisces, Fish Perch               | 0.04% |
| 227 | Pisces, Ocean Sunfish            | 0.04% |
| 228 | Primates, Gibbon                 | 0.04% |
| 229 | Primates, Gorilla Mountain       | 0.04% |
| 230 | Primates, Monkey Howler          | 0.04% |
| 231 | Primates, Orangutan Bornean      | 0.04% |
| 232 | Rodentia, Naked Mole-Rat         | 0.04% |
| 233 | Squamata, Python                 | 0.04% |
| 234 | Amphibia, Salamander             | 0.03% |
| 235 | Artiodactyla, Oryx               | 0.03% |
| 236 | Aves, Cockatoo                   | 0.03% |

|     |                                   |       |
|-----|-----------------------------------|-------|
| 237 | Aves, Condor California           | 0.03% |
| 238 | Aves, Crow                        | 0.03% |
| 239 | Aves, Kiwi                        | 0.03% |
| 240 | Aves, Penguin Emperor             | 0.03% |
| 241 | Aves, Penguin Galapagos           | 0.03% |
| 242 | Carnivora, Ferret                 | 0.03% |
| 243 | Carnivora, Fox Fennec             | 0.03% |
| 244 | Carnivora, Leopard Clouded        | 0.03% |
| 245 | Carnivora, Tiger Malayan          | 0.03% |
| 246 | Carnivora, Wolf Maned             | 0.03% |
| 247 | Cetacea, Whale Sperm              | 0.03% |
| 248 | Chelonia, Turtle Snapping         | 0.03% |
| 249 | Chiroptera, Bat Fruit             | 0.03% |
| 250 | Marsupialia, Possum               | 0.03% |
| 251 | Pisces, Fish Cod                  | 0.03% |
| 252 | Pisces, Fish Lionfish             | 0.03% |
| 253 | Pisces, Fish Rock                 | 0.03% |
| 254 | Pisces, Fish Sea Dragon           | 0.03% |
| 255 | Pisces, Fish Sturgeon             | 0.03% |
| 256 | Primates, Baby Bush               | 0.03% |
| 257 | Primates, Gorilla Western Lowland | 0.03% |
| 258 | Rodentia, Rodent                  | 0.03% |
| 259 | Rodentia, Squirrel Flying         | 0.03% |
| 260 | Squamata, Cobra King              | 0.03% |
| 261 | Squamata, Dragon Bearded          | 0.03% |
| 262 | Squamata, Snake Cotton Mouth      | 0.03% |
| 263 | Artiodactyla, Buffalo Cape        | 0.02% |
| 264 | Artiodactyla, Impala              | 0.02% |
| 265 | Artiodactyla, Sheep Bighorn       | 0.02% |
| 266 | Artiodactyla, Takin               | 0.02% |
| 267 | Aves, Bird North American         | 0.02% |
| 268 | Aves, Bird Of Prey Large          | 0.02% |
| 269 | Aves, Crane Whooping              | 0.02% |
| 270 | Aves, Egret                       | 0.02% |
| 271 | Aves, Falcon Peregrine            | 0.02% |
| 272 | Aves, Gull                        | 0.02% |
| 273 | Aves, Oriole                      | 0.02% |
| 274 | Aves, Owl Barn                    | 0.02% |
| 275 | Aves, Owl Great Horned            | 0.02% |
| 276 | Aves, Owl Snowy                   | 0.02% |
| 277 | Aves, Raven                       | 0.02% |
| 278 | Aves, Roadrunner                  | 0.02% |
| 279 | Aves, Stork                       | 0.02% |
| 280 | Carnivora, Kinkajou               | 0.02% |
| 281 | Carnivora, Seal Elephant          | 0.02% |
| 282 | Chiroptera, Bat Vampire           | 0.02% |
| 283 | Invertebrate, Cockroach           | 0.02% |
| 284 | Invertebrate, Crab Blue           | 0.02% |

|     |                                   |       |
|-----|-----------------------------------|-------|
| 285 | Invertebrate, Crab Hermit         | 0.02% |
| 286 | Invertebrate, Grasshopper         | 0.02% |
| 287 | Invertebrate, Squid Giant         | 0.02% |
| 288 | Perissodactyla, Rhinoceros Javan  | 0.02% |
| 289 | Pisces, Fish Blob                 | 0.02% |
| 290 | Pisces, Fish Moray Eel            | 0.02% |
| 291 | Pisces, Fish Rainbow Trout        | 0.02% |
| 292 | Pisces, Fish Walleye              | 0.02% |
| 293 | Plankton, Plankton                | 0.02% |
| 294 | Primates, Lemur Ring-Tailed       | 0.02% |
| 295 | Primates, Macaque Japanese        | 0.02% |
| 296 | Primates, Mandrill                | 0.02% |
| 297 | Primates, Monkey Rainforest       | 0.02% |
| 298 | Primates, Orangutan Sumatran      | 0.02% |
| 299 | Rodentia, Chinchilla              | 0.02% |
| 300 | Squamata, Lizard Horned           | 0.02% |
| 301 | Squamata, Snake Giant             | 0.02% |
| 302 | Squamata, Snake Water             | 0.02% |
| 303 | Amphibia, Bullfrog American       | 0.01% |
| 304 | Artiodactyla, Camel Bactrian      | 0.01% |
| 305 | Artiodactyla, Dik-Dik             | 0.01% |
| 306 | Artiodactyla, Eland               | 0.01% |
| 307 | Artiodactyla, Ibex                | 0.01% |
| 308 | Artiodactyla, Pronghorn           | 0.01% |
| 309 | Artiodactyla, Sheep Barbary       | 0.01% |
| 310 | Artiodactyla, Sheep Mountain      | 0.01% |
| 311 | Artiodactyla, Springbok           | 0.01% |
| 312 | Aves, Albatross                   | 0.01% |
| 313 | Aves, Bird Migratory              | 0.01% |
| 314 | Aves, Booby Blue Footed           | 0.01% |
| 315 | Aves, Cockatiel                   | 0.01% |
| 316 | Aves, Eagle Golden                | 0.01% |
| 317 | Aves, Eagle Harpy                 | 0.01% |
| 318 | Aves, Geese Canadian              | 0.01% |
| 319 | Aves, Herons Blue                 | 0.01% |
| 320 | Aves, Hornbill                    | 0.01% |
| 321 | Aves, Ibis                        | 0.01% |
| 322 | Aves, Lorikeets                   | 0.01% |
| 323 | Aves, Macaw Blue                  | 0.01% |
| 324 | Aves, Tern                        | 0.01% |
| 325 | Carnivora, Badger Honey           | 0.01% |
| 326 | Carnivora, Cat Pallas             | 0.01% |
| 327 | Carnivora, Cat Small              | 0.01% |
| 328 | Carnivora, Civet                  | 0.01% |
| 329 | Carnivora, Leopard Amur           | 0.01% |
| 330 | Carnivora, Raccoon South American | 0.01% |
| 331 | Carnivora, Serval                 | 0.01% |
| 332 | Carnivora, Tiger South China      | 0.01% |

|     |                                   |       |
|-----|-----------------------------------|-------|
| 333 | Carnivora, Tiger Sumatran         | 0.01% |
| 334 | Cetacea, Dolphin Bottlenose       | 0.01% |
| 335 | Cetacea, Vaquita                  | 0.01% |
| 336 | Cetacea, Whale Gray               | 0.01% |
| 337 | Chelonia, Turtle Green Sea        | 0.01% |
| 338 | Chelonia, Turtle Leatherback      | 0.01% |
| 339 | Chelonia, Turtle Loggerhead Sea   | 0.01% |
| 340 | Chondrichthyes, Skate             | 0.01% |
| 341 | Crocodylia, Gharial               | 0.01% |
| 342 | Insectivora, Shrew                | 0.01% |
| 343 | Invertebrate, Butterfly Blue      | 0.01% |
| 344 | Invertebrate, Crab Snow           | 0.01% |
| 345 | Invertebrate, Cricket             | 0.01% |
| 346 | Invertebrate, Insect Endangered   | 0.01% |
| 347 | Invertebrate, Ladybug             | 0.01% |
| 348 | Invertebrate, Spider Black Widow  | 0.01% |
| 349 | Invertebrate, Squid Vampire       | 0.01% |
| 350 | Lagomorpha, Jackrabbit            | 0.01% |
| 351 | Marsupialia, Kangaroo Red         | 0.01% |
| 352 | Perissodactyla, Rhinoceros Indian | 0.01% |
| 353 | Pisces, Fish Anchovy              | 0.01% |
| 354 | Pisces, Fish Barracuda            | 0.01% |
| 355 | Pisces, Fish Blow                 | 0.01% |
| 356 | Pisces, Fish Bluegill             | 0.01% |
| 357 | Pisces, Fish Coelacanth           | 0.01% |
| 358 | Pisces, Fish Convict Cichlid      | 0.01% |
| 359 | Pisces, Fish Dragon               | 0.01% |
| 360 | Pisces, Fish Endangered           | 0.01% |
| 361 | Pisces, Fish Large                | 0.01% |
| 362 | Pisces, Fish Marlin               | 0.01% |
| 363 | Pisces, Fish Northern Pike        | 0.01% |
| 364 | Pisces, Fish Sun                  | 0.01% |
| 365 | Pisces, Fish Zebra                | 0.01% |
| 366 | Pisces, Sunfish Freshwater        | 0.01% |
| 367 | Primates, Ape Lesser              | 0.01% |
| 368 | Primates, Aye Aye                 | 0.01% |
| 369 | Primates, Gorilla Cross River     | 0.01% |
| 370 | Primates, Monkey African          | 0.01% |
| 371 | Primates, Monkey Squirrel         | 0.01% |
| 372 | Primates, Primates Endangered     | 0.01% |
| 373 | Primates, Tamarin                 | 0.01% |
| 374 | Primates, Tamarin Golden Lion     | 0.01% |
| 375 | Reptilia, Reptile Endangered      | 0.01% |
| 376 | Rodentia, Cavy Patagonian         | 0.01% |
| 377 | Sirenia, Cow Sea                  | 0.01% |
| 378 | Squamata, Gecko Leopard           | 0.01% |
| 379 | Squamata, Iguana Green            | 0.01% |
| 380 | Squamata, Mamba Black             | 0.01% |

|     |                                    |       |
|-----|------------------------------------|-------|
| 381 | Squamata, Mamba Green              | 0.01% |
| 382 | Squamata, Monster Gila             | 0.01% |
| 383 | Squamata, Snake Coral              | 0.01% |
| 384 | Squamata, Snake Corn               | 0.01% |
| 385 | Squamata, Snake Sea                | 0.01% |
| 386 | Amphibia, Frog Blue Poison Dart    | 0.01% |
| 387 | Amphibia, Frog Goliath             | 0.01% |
| 388 | Amphibia, Frog Lehmann's Poison    | 0.01% |
| 389 | Amphibia, Frog Little Tree         | 0.01% |
| 390 | Amphibia, Frog Mountain Chicken    | 0.01% |
| 391 | Amphibia, Frog Rainforest          | 0.01% |
| 392 | Amphibia, Newt                     | 0.01% |
| 393 | Amphibia, Salamander Giant         | 0.01% |
| 394 | Amphibia, Salamander Shenandoah    | 0.01% |
| 395 | Artiodactyla, Addax                | 0.01% |
| 396 | Artiodactyla, Antelope African     | 0.01% |
| 397 | Artiodactyla, Antelope Sable       | 0.01% |
| 398 | Artiodactyla, Bison Wood           | 0.01% |
| 399 | Artiodactyla, Bongo                | 0.01% |
| 400 | Artiodactyla, Chinkara             | 0.01% |
| 401 | Artiodactyla, Deer Axis            | 0.01% |
| 402 | Artiodactyla, Deer Blacktailed     | 0.01% |
| 403 | Artiodactyla, Deer Key             | 0.01% |
| 404 | Artiodactyla, Deer Leaf            | 0.01% |
| 405 | Artiodactyla, Deer Mule            | 0.01% |
| 406 | Artiodactyla, Deer Sika            | 0.01% |
| 407 | Proboscidea, Elephant African Bush | 0.01% |
| 408 | Proboscidea, Elephant Borneo Pygmy | 0.01% |
| 409 | Proboscidea, Elephant Pygmy        | 0.01% |
| 410 | Artiodactyla, Elk Roosevelt        | 0.01% |
| 411 | Artiodactyla, Gaur                 | 0.01% |
| 412 | Artiodactyla, Gemsbok              | 0.01% |
| 413 | Artiodactyla, Hippopotamus Pygmy   | 0.01% |
| 414 | Artiodactyla, Hog Red River        | 0.01% |
| 415 | Artiodactyla, Markhor              | 0.01% |
| 416 | Artiodactyla, Oryx Arabian         | 0.01% |
| 417 | Artiodactyla, Oryx Scimitar        | 0.01% |
| 418 | Artiodactyla, Saola                | 0.01% |
| 419 | Artiodactyla, Sheep Dall           | 0.01% |
| 420 | Artiodactyla, Wildebeest Black     | 0.01% |
| 421 | Aves, Aracari                      | 0.01% |
| 422 | Aves, Bird Endangered Rainforest   | 0.01% |
| 423 | Aves, Bird Large Ground            | 0.01% |
| 424 | Aves, Bird Mountain                | 0.01% |
| 425 | Aves, Bird Of Paradise Superb      | 0.01% |
| 426 | Aves, Bird Of Prey Endangered      | 0.01% |
| 427 | Aves, Bird Prairie                 | 0.01% |
| 428 | Aves, Bird Predatory               | 0.01% |

|     |                                    |       |
|-----|------------------------------------|-------|
| 429 | Aves, Birds Large                  | 0.01% |
| 430 | Aves, Bluebird Fairy               | 0.01% |
| 431 | Aves, Bustard Kori                 | 0.01% |
| 432 | Aves, Buzzard                      | 0.01% |
| 433 | Aves, Chicken Prairie              | 0.01% |
| 434 | Aves, Crane Blue                   | 0.01% |
| 435 | Aves, Crane Sandhill               | 0.01% |
| 436 | Aves, Duck Wood                    | 0.01% |
| 437 | Aves, Ducks South American         | 0.01% |
| 438 | Aves, Eagle Philippine             | 0.01% |
| 439 | Aves, Emerald Hummingbird          | 0.01% |
| 440 | Aves, Falcon Gyr                   | 0.01% |
| 441 | Aves, Finch Galapagos              | 0.01% |
| 442 | Aves, Fowl Guinea                  | 0.01% |
| 443 | Aves, Geese Nene                   | 0.01% |
| 444 | Aves, Goldfinch                    | 0.01% |
| 445 | Aves, Guineafowl Helmeted          | 0.01% |
| 446 | Aves, Hammerkop                    | 0.01% |
| 447 | Aves, Hawk Red Tail                | 0.01% |
| 448 | Aves, Heron                        | 0.01% |
| 449 | Aves, Honeycreeper                 | 0.01% |
| 450 | Aves, Honeyeater Regent            | 0.01% |
| 451 | Aves, Hummingbird - Green Breasted | 0.01% |
| 452 | Aves, Ibis Sacred                  | 0.01% |
| 453 | Aves, I'iwi                        | 0.01% |
| 454 | Aves, Kookaburra                   | 0.01% |
| 455 | Aves, Macaw Hyacinth               | 0.01% |
| 456 | Aves, Macaw Scarlet                | 0.01% |
| 457 | Aves, Martin Purple                | 0.01% |
| 458 | Aves, Mynah Bali                   | 0.01% |
| 459 | Aves, Owl Burrowing                | 0.01% |
| 460 | Aves, Owl Elf                      | 0.01% |
| 461 | Aves, Owl Great Grey               | 0.01% |
| 462 | Aves, Owl Screech                  | 0.01% |
| 463 | Aves, Owl Spotted                  | 0.01% |
| 464 | Aves, Parakeet Echo                | 0.01% |
| 465 | Aves, Parrot Yellow Naped          | 0.01% |
| 466 | Aves, Partridge Crested Wood       | 0.01% |
| 467 | Aves, Penguin African              | 0.01% |
| 468 | Aves, Pheasant                     | 0.01% |
| 469 | Aves, Pheasant Golden              | 0.01% |
| 470 | Aves, Plover Gray                  | 0.01% |
| 471 | Aves, Quetzal                      | 0.01% |
| 472 | Aves, Ratite                       | 0.01% |
| 473 | Aves, Rheas                        | 0.01% |
| 474 | Aves, Sandpiper                    | 0.01% |
| 475 | Aves, Spoonbill                    | 0.01% |
| 476 | Aves, Stork Marabou                | 0.01% |

|     |                                     |       |
|-----|-------------------------------------|-------|
| 477 | Aves, Swallow                       | 0.01% |
| 478 | Aves, Thrush Blue Crowned Laughing  | 0.01% |
| 479 | Aves, Titmouse                      | 0.01% |
| 480 | Aves, Trumpeter                     | 0.01% |
| 481 | Aves, Vulture Bearded               | 0.01% |
| 482 | Aves, Warbler Kirtland's            | 0.01% |
| 483 | Aves, Warbler Yellow Bellied        | 0.01% |
| 484 | Aves, Whippoorwill                  | 0.01% |
| 485 | Carnivora, Bear Spectacled          | 0.01% |
| 486 | Carnivora, Black Bear, Formosan     | 0.01% |
| 487 | Carnivora, Cat Bengal               | 0.01% |
| 488 | Carnivora, Cat South American       | 0.01% |
| 489 | Carnivora, Coati                    | 0.01% |
| 490 | Carnivora, Dhole                    | 0.01% |
| 491 | Carnivora, Fossa                    | 0.01% |
| 492 | Carnivora, Fox Kit                  | 0.01% |
| 493 | Carnivora, Fox Swift                | 0.01% |
| 494 | Carnivora, Fox Tibetan Sand         | 0.01% |
| 495 | Carnivora, Genet Spotted            | 0.01% |
| 496 | Carnivora, Jackal                   | 0.01% |
| 497 | Carnivora, Lynx Canadian            | 0.01% |
| 498 | Carnivora, Sea Lion California      | 0.01% |
| 499 | Carnivora, Seal Fur                 | 0.01% |
| 500 | Carnivora, Wolf Ethiopian           | 0.01% |
| 501 | Carnivora, Wolf Mexican Gray        | 0.01% |
| 502 | Cetacea, Dolphin Ganges River       | 0.01% |
| 503 | Cetacea, Dolphin Indus River        | 0.01% |
| 504 | Cetacea, Dolphin Irrawaddy          | 0.01% |
| 505 | Cetacea, Dolphin River              | 0.01% |
| 506 | Cetacea, Porpoise Yangtze Finless   | 0.01% |
| 507 | Cetacea, Whale Fin                  | 0.01% |
| 508 | Cetacea, Whale Minke                | 0.01% |
| 509 | Cetacea, Whale North Atlantic Right | 0.01% |
| 510 | Cetacea, Whale Pilot                | 0.01% |
| 511 | Cetacea, Whale Right                | 0.01% |
| 512 | Chelonia, Cooter                    | 0.01% |
| 513 | Chelonia, Slider                    | 0.01% |
| 514 | Chelonia, Tortoise Aldabra Giant    | 0.01% |
| 515 | Chelonia, Tortoise Ploughshare      | 0.01% |
| 516 | Chelonia, Turtle Alligator Snapping | 0.01% |
| 517 | Chelonia, Turtle Box                | 0.01% |
| 518 | Chiroptera, Microbat                | 0.01% |
| 519 | Chondrichthyes, Shark Basking       | 0.01% |
| 520 | Chondrichthyes, Shark Frilled       | 0.01% |
| 521 | Chondrichthyes, Shark Goblin        | 0.01% |
| 522 | Chondrichthyes, Shark Nurse         | 0.01% |
| 523 | Chondrichthyes, Shark Small         | 0.01% |
| 524 | Crocodylia, Caiman                  | 0.01% |

|     |                                          |       |
|-----|------------------------------------------|-------|
| 525 | Insectivora, Shrew Tree                  | 0.01% |
| 526 | Insectivora, Tenrec                      | 0.01% |
| 527 | Invertebrate, Abalone                    | 0.01% |
| 528 | Invertebrate, Butterfly African          | 0.01% |
| 529 | Invertebrate, Butterfly Asian            | 0.01% |
| 530 | Invertebrate, Butterfly Australian       | 0.01% |
| 531 | Invertebrate, Butterfly Morpho           | 0.01% |
| 532 | Invertebrate, Butterfly North American   | 0.01% |
| 533 | Invertebrate, Butterfly Silvery Blue     | 0.01% |
| 534 | Invertebrate, Cephalopods                | 0.01% |
| 535 | Invertebrate, Cicadas                    | 0.01% |
| 536 | Invertebrate, Coral Fan                  | 0.01% |
| 537 | Invertebrate, Crab Horseshoe             | 0.01% |
| 538 | Invertebrate, Crab Japanese Spider       | 0.01% |
| 539 | Invertebrate, Crayfish White Clawed      | 0.01% |
| 540 | Invertebrate, Dollar Sand                | 0.01% |
| 541 | Invertebrate, Dusky-Wing Dreamy          | 0.01% |
| 542 | Invertebrate, Earthworm                  | 0.01% |
| 543 | Invertebrate, Hornet                     | 0.01% |
| 544 | Invertebrate, Moth Gypsy                 | 0.01% |
| 545 | Invertebrate, Moth Luna                  | 0.01% |
| 546 | Invertebrate, Nautilus Chambered         | 0.01% |
| 547 | Invertebrate, Phasmid                    | 0.01% |
| 548 | Invertebrate, Portuguese Man O' War      | 0.01% |
| 549 | Invertebrate, Roach South Africa         | 0.01% |
| 550 | Invertebrate, Scallop                    | 0.01% |
| 551 | Invertebrate, Scorpion Giant Forest      | 0.01% |
| 552 | Invertebrate, Skipper Field              | 0.01% |
| 553 | Invertebrate, Snail Apple                | 0.01% |
| 554 | Invertebrate, Spider Brazilian Wandering | 0.01% |
| 555 | Invertebrate, Spider Goliath Birdeater   | 0.01% |
| 556 | Invertebrate, Spider Huntsman            | 0.01% |
| 557 | Invertebrate, Spider Jumping             | 0.01% |
| 558 | Invertebrate, Spider Wolf                | 0.01% |
| 559 | Invertebrate, Termite                    | 0.01% |
| 560 | Lagomorpha, Pikas                        | 0.01% |
| 561 | Lagomorpha, Rabbit Angora                | 0.01% |
| 562 | Marsupialia, Kangaroo Grey               | 0.01% |
| 563 | Marsupialia, Quoll                       | 0.01% |
| 564 | Monotremata, Echidna                     | 0.01% |
| 565 | Perissodactyla, Rhinoceros Endangered    | 0.01% |
| 566 | Perissodactyla, Rhinoceros Sumatran      | 0.01% |
| 567 | Perissodactyla, Tapir Baird's            | 0.01% |
| 568 | Pisces, Armored Catfish                  | 0.01% |
| 569 | Pisces, Fish Blue Tang                   | 0.01% |
| 570 | Pisces, Fish Bluefin Tuna                | 0.01% |
| 571 | Pisces, Fish Carp                        | 0.01% |
| 572 | Pisces, Fish Chub                        | 0.01% |

|     |                                    |       |
|-----|------------------------------------|-------|
| 573 | Pisces, Fish Cutthroat Trout       | 0.01% |
| 574 | Pisces, Fish Devil's Hole Pup      | 0.01% |
| 575 | Pisces, Fish Goliath Grouper       | 0.01% |
| 576 | Pisces, Fish Humphead Wrasse       | 0.01% |
| 577 | Pisces, Fish King                  | 0.01% |
| 578 | Pisces, Fish Mackerel              | 0.01% |
| 579 | Pisces, Fish Mahi Mahi             | 0.01% |
| 580 | Pisces, Fish Moony                 | 0.01% |
| 581 | Pisces, Fish Pacu                  | 0.01% |
| 582 | Pisces, Fish Parrot                | 0.01% |
| 583 | Pisces, Fish Pike                  | 0.01% |
| 584 | Pisces, Fish Salmon King           | 0.01% |
| 585 | Pisces, Fish Sheepshead            | 0.01% |
| 586 | Pisces, Fish Siamese Fighting      | 0.01% |
| 587 | Pisces, Fish Tetra                 | 0.01% |
| 588 | Pisces, Fish Yellow Tang           | 0.01% |
| 589 | Pisces, Pupfish                    | 0.01% |
| 590 | Plankton, Zooplankton              | 0.01% |
| 591 | Primates, Capuchin                 | 0.01% |
| 592 | Primates, Gorilla Eastern Lowland  | 0.01% |
| 593 | Primates, Lemur Black              | 0.01% |
| 594 | Primates, Lemur Golden Bamboo      | 0.01% |
| 595 | Primates, Lemur Mongoose           | 0.01% |
| 596 | Primates, Loris Slow               | 0.01% |
| 597 | Primates, Marmoset                 | 0.01% |
| 598 | Primates, Marmoset Pygmy           | 0.01% |
| 599 | Primates, Monkey Asian             | 0.01% |
| 600 | Primates, Monkey Dusky Leaf        | 0.01% |
| 601 | Primates, Monkey Golden Snub-Nosed | 0.01% |
| 602 | Primates, Monkey Rhesus            | 0.01% |
| 603 | Reptilia, Reptile Small            | 0.01% |
| 604 | Rhynchocephalia, Tuatara           | 0.01% |
| 605 | Rodentia, Chuck Wood               | 0.01% |
| 606 | Rodentia, Gerbil                   | 0.01% |
| 607 | Rodentia, Gopher                   | 0.01% |
| 608 | Rodentia, Marmot                   | 0.01% |
| 609 | Rodentia, Mouse Field              | 0.01% |
| 610 | Rodentia, Muskrat                  | 0.01% |
| 611 | Rodentia, Pig Guinea               | 0.01% |
| 612 | Rodentia, Rat Mole                 | 0.01% |
| 613 | Rodentia, Squirrel Ground          | 0.01% |
| 614 | Rodentia, Vole                     | 0.01% |
| 615 | Squamata, Copperhead               | 0.01% |
| 616 | Squamata, Lizard Australian        | 0.01% |
| 617 | Squamata, Lizard Endangered        | 0.01% |
| 618 | Squamata, Mamba                    | 0.01% |
| 619 | Squamata, Monitor Nile             | 0.01% |
| 620 | Squamata, Python Blood             | 0.01% |

|     |                                     |       |
|-----|-------------------------------------|-------|
| 621 | Squamata, Skink Blue Tongued        | 0.01% |
| 622 | Squamata, Snake Black Rat           | 0.01% |
| 623 | Squamata, Snake Diamond Back Rattle | 0.01% |
| 624 | Squamata, Snake Endangered          | 0.01% |
| 625 | Squamata, Snake Garden              | 0.01% |
| 626 | Squamata, Snake Grey Rat            | 0.01% |
| 627 | Squamata, Snake King                | 0.01% |
| 628 | Squamata, Snakes Sidewinder         | 0.01% |
| 629 | Squamata, Toad Horny                | 0.01% |
| 630 | Xenarthra, Armadillo Three-Banded   | 0.01% |
| 631 | Xenarthra, Tamandua                 | 0.01% |

| AZA Members (n=25,851 votes cast) |                             |            |
|-----------------------------------|-----------------------------|------------|
| Rank                              | Animal Name                 | %<br>Votes |
| 1                                 | Artiodactyla, Giraffe       | 1.86%      |
| 2                                 | Carnivora, Tiger            | 1.60%      |
| 3                                 | Primates, Gorilla           | 1.27%      |
| 4                                 | Carnivora, Bear Polar       | 1.26%      |
| 5                                 | Carnivora, Lion             | 1.25%      |
| 6                                 | Primates, Orangutan         | 1.22%      |
| 7                                 | Proboscidea, Elephant       | 1.16%      |
| 8                                 | Perissodactyla, Zebra       | 1.11%      |
| 9                                 | Invertebrate, Coral         | 1.05%      |
| 10                                | Aves, Penguin               | 1.00%      |
| 11                                | Primates, Lemur             | 0.96%      |
| 12                                | Carnivora, Panda Red        | 0.94%      |
| 13                                | Chondrichthyes, Shark       | 0.91%      |
| 14                                | Artiodactyla, Hippopotamus  | 0.86%      |
| 15                                | Carnivora, Bear             | 0.78%      |
| 16                                | Carnivora, Leopard Snow     | 0.76%      |
| 17                                | Carnivora, Dog African Wild | 0.74%      |
| 18                                | Primates, Chimpanzee        | 0.72%      |
| 19                                | Carnivora, Cheetah          | 0.71%      |
| 20                                | Crocodylia, Crocodile       | 0.71%      |
| 21                                | Artiodactyla, Okapi         | 0.71%      |
| 22                                | Chelonia, Turtle Sea        | 0.68%      |
| 23                                | Xenarthra, Pangolin         | 0.65%      |
| 24                                | Carnivora, Jaguar           | 0.64%      |
| 25                                | Xenarthra, Sloth            | 0.64%      |
| 26                                | Marsupialia, Koala          | 0.63%      |
| 27                                | Xenarthra, Anteater         | 0.62%      |
| 28                                | Squamata, Dragon Komodo     | 0.62%      |
| 29                                | Aves, Flamingo              | 0.60%      |
| 30                                | Carnivora, Sea Lion         | 0.57%      |
| 31                                | Perissodactyla, Tapir       | 0.56%      |
| 32                                | Carnivora, Wolf             | 0.53%      |
| 33                                | Aves, Vulture               | 0.52%      |

|    |                                  |       |
|----|----------------------------------|-------|
| 34 | Invertebrate, Butterfly          | 0.50% |
| 35 | Carnivora, Otter                 | 0.50% |
| 36 | Artiodactyla, Bison              | 0.50% |
| 37 | Primates, Gibbon                 | 0.48% |
| 38 | Carnivora, Leopard               | 0.48% |
| 39 | Crocodylia, Alligator            | 0.47% |
| 40 | Marsupialia, Kangaroo            | 0.45% |
| 41 | Artiodactyla, Bongo              | 0.43% |
| 42 | Carnivora, Hyena                 | 0.43% |
| 43 | Aves, Hornbill                   | 0.42% |
| 44 | Aves, Ostrich                    | 0.42% |
| 45 | Proboscidea, Elephant Asian      | 0.41% |
| 46 | Proboscidea, Elephant African    | 0.40% |
| 47 | Carnivora, Meerkat               | 0.40% |
| 48 | Invertebrate, Octopus            | 0.40% |
| 49 | Carnivora, Puma                  | 0.39% |
| 50 | Aves, Crane                      | 0.38% |
| 51 | Chelonia, Tortoise Galapagos     | 0.38% |
| 52 | Carnivora, Leopard Amur          | 0.38% |
| 53 | Carnivora, Panda Giant           | 0.38% |
| 54 | Chelonia, Tortoise               | 0.38% |
| 55 | Primates, Bonobo                 | 0.38% |
| 56 | Cetacea, Dolphin                 | 0.36% |
| 57 | Perissodactyla, Rhinoceros Black | 0.36% |
| 58 | Carnivora, Walrus                | 0.36% |
| 59 | Primates, Ape Great              | 0.35% |
| 60 | Sirenia, Manatee                 | 0.35% |
| 61 | Chelonia, Turtle                 | 0.34% |
| 62 | Amphibia, Frog Poison Dart       | 0.34% |
| 63 | Aves, Macaw                      | 0.34% |
| 64 | Carnivora, Seal                  | 0.33% |
| 65 | Aves, Eagle Bald                 | 0.33% |
| 66 | Perissodactyla, Rhinoceros White | 0.33% |
| 67 | Carnivora, Otter Sea             | 0.32% |
| 68 | Primates, Tamarin                | 0.32% |
| 69 | Rodentia, Capybara               | 0.31% |
| 70 | Aves, Ratite Cassowary           | 0.31% |
| 71 | Carnivora, Leopard Clouded       | 0.30% |
| 72 | Artiodactyla, Warthog            | 0.30% |
| 73 | Carnivora, Wolf Maned            | 0.30% |
| 74 | Carnivora, Fossa                 | 0.29% |
| 75 | Carnivora, Panda                 | 0.29% |
| 76 | Artiodactyla, Moose              | 0.29% |
| 77 | Aves, Eagle                      | 0.29% |
| 78 | Aves, Toucan                     | 0.29% |
| 79 | Carnivora, Bear Sloth            | 0.29% |
| 80 | Marsupialia, Devil Tasmanian     | 0.29% |
| 81 | Carnivora, Bear Black            | 0.28% |

|     |                                       |       |
|-----|---------------------------------------|-------|
| 82  | Carnivora, Bear Sun                   | 0.28% |
| 83  | Carnivora, Ferret Black Footed        | 0.28% |
| 84  | Monotremata, Platypus                 | 0.28% |
| 85  | Pisces, Fish Seahorse                 | 0.27% |
| 86  | Artiodactyla, Antelope                | 0.26% |
| 87  | Chondrichthyes, Ray                   | 0.26% |
| 88  | Marsupialia, Wombat                   | 0.26% |
| 89  | Carnivora, Wolf Red                   | 0.25% |
| 90  | Squamata, Lizard                      | 0.25% |
| 91  | Aves, Condor California               | 0.24% |
| 92  | Carnivora, Otter River                | 0.24% |
| 93  | Cetacea, Whale Beluga                 | 0.24% |
| 94  | Perissodactyla, Rhinoceros Indian     | 0.24% |
| 95  | Artiodactyla, Hog Red River           | 0.24% |
| 96  | Invertebrate, Bee                     | 0.24% |
| 97  | Amphibia, Hellbender                  | 0.23% |
| 98  | Amphibia, Salamander                  | 0.23% |
| 99  | Carnivora, Lion African               | 0.23% |
| 100 | Marsupialia, Kangaroo Tree Matschie's | 0.23% |
| 101 | Primates, Siamang                     | 0.23% |
| 102 | Chiroptera, Bat                       | 0.23% |
| 103 | Tubulidentata, Aardvark               | 0.23% |
| 104 | Rodentia, Porcupine                   | 0.22% |
| 105 | Artiodactyla, Camel                   | 0.22% |
| 106 | Aves, Condor                          | 0.22% |
| 107 | Aves, Penguin African                 | 0.22% |
| 108 | Carnivora, Ocelot                     | 0.22% |
| 109 | Aves, Kiwi                            | 0.21% |
| 110 | Carnivora, Cat Small                  | 0.21% |
| 111 | Artiodactyla, Hoofstock African       | 0.21% |
| 112 | Carnivora, Bear Brown                 | 0.21% |
| 113 | Primates, Tamarin Golden Lion         | 0.21% |
| 114 | Carnivora, Bear Grizzly               | 0.20% |
| 115 | Carnivora, Tiger Amur                 | 0.20% |
| 116 | Marsupialia, Wallaby                  | 0.20% |
| 117 | Primates, Monkey New World            | 0.20% |
| 118 | Aves, Raptor                          | 0.20% |
| 119 | Invertebrate, Tarantula               | 0.20% |
| 120 | Monotremata, Echidna                  | 0.20% |
| 121 | Artiodactyla, Takin                   | 0.19% |
| 122 | Aves, Bird Rainforest                 | 0.19% |
| 123 | Perissodactyla, Horse Przewalski      | 0.19% |
| 124 | Primates, Baboon Mandrill             | 0.19% |
| 125 | Primates, Monkey Spider               | 0.19% |
| 126 | Aves, Bird Of Prey                    | 0.19% |
| 127 | Aves, Songbird                        | 0.19% |
| 128 | Artiodactyla, Addax                   | 0.19% |
| 129 | Cetacea, Whale Killer                 | 0.19% |

|     |                                  |       |
|-----|----------------------------------|-------|
| 130 | Chelonia, Tortoise Radiated      | 0.18% |
| 131 | Crocodylia, Gharial              | 0.18% |
| 132 | Squamata, Rattlesnake            | 0.18% |
| 133 | Artiodactyla, Gazelle            | 0.18% |
| 134 | Aves, Waterfowl                  | 0.18% |
| 135 | Artiodactyla, Oryx               | 0.17% |
| 136 | Primates, Aye Aye                | 0.17% |
| 137 | Primates, Monkey Old World       | 0.17% |
| 138 | Carnivora, Fox                   | 0.17% |
| 139 | Carnivora, Wolf Gray             | 0.17% |
| 140 | Invertebrate, Butterfly Monarch  | 0.17% |
| 141 | Perissodactyla, Zebra Grevy's    | 0.17% |
| 142 | Carnivora, Binturong             | 0.17% |
| 143 | Carnivora, Serval                | 0.17% |
| 144 | Aves, Pelican                    | 0.16% |
| 145 | Aves, Puffin                     | 0.16% |
| 146 | Rodentia, Naked Mole-Rat         | 0.16% |
| 147 | Artiodactyla, Kudu               | 0.16% |
| 148 | Aves, Emu                        | 0.16% |
| 149 | Aves, Kookaburra                 | 0.16% |
| 150 | Carnivora, Cat Sand              | 0.16% |
| 151 | Rodentia, Beaver                 | 0.16% |
| 152 | Xenarthra, Armadillo             | 0.16% |
| 153 | Artiodactyla, Hippopotamus Pygmy | 0.15% |
| 154 | Artiodactyla, Hoofstock          | 0.15% |
| 155 | Squamata, Iguana                 | 0.15% |
| 156 | Aves, Crane Whooping             | 0.15% |
| 157 | Carnivora, Cat Pallas            | 0.15% |
| 158 | Carnivora, Wolf Mexican Gray     | 0.15% |
| 159 | Cetacea, Vaquita                 | 0.15% |
| 160 | Chelonia, Tortoise Giant Aldabra | 0.15% |
| 161 | Reptilia, Reptile                | 0.15% |
| 162 | Chondrichthyes, Shark Whale      | 0.14% |
| 163 | Primates, Marmoset               | 0.14% |
| 164 | Primates, Monkey                 | 0.14% |
| 165 | Rodentia, Dog Prairie            | 0.14% |
| 166 | Artiodactyla, Wildebeest         | 0.14% |
| 167 | Aves, Bird Hummingbird           | 0.14% |
| 168 | Carnivora, Otter Small Clawed    | 0.14% |
| 169 | Marsupialia, Marsupial           | 0.14% |
| 170 | Primates, Ape                    | 0.14% |
| 171 | Artiodactyla, Pronghorn          | 0.14% |
| 172 | Aves, Condor Andean              | 0.14% |
| 173 | Carnivora, Fox Fennec            | 0.14% |
| 174 | Carnivora, Otter Giant           | 0.14% |
| 175 | Chelonia, Tortoise Giant         | 0.14% |
| 176 | Invertebrate, Starfish           | 0.14% |
| 177 | Squamata, Anaconda               | 0.14% |

|     |                                          |       |
|-----|------------------------------------------|-------|
| 178 | Chondrichthyes, Stingray                 | 0.13% |
| 179 | Primates, Monkey Howler                  | 0.13% |
| 180 | Squamata, Chameleon                      | 0.13% |
| 181 | Artiodactyla, Babirusa                   | 0.13% |
| 182 | Carnivora, Mongoose                      | 0.13% |
| 183 | Xenarthra, Tamandua                      | 0.13% |
| 184 | Amphibia, Frog Panamanian Golden         | 0.12% |
| 185 | Artiodactyla, Deer                       | 0.12% |
| 186 | Aves, Eagle Harpy                        | 0.12% |
| 187 | Aves, Hawk                               | 0.12% |
| 188 | Aves, Ratite                             | 0.12% |
| 189 | Carnivora, Cat Fishing                   | 0.12% |
| 190 | Carnivora, Wolverine                     | 0.12% |
| 191 | Cetacea, Whale                           | 0.12% |
| 192 | Carnivora, Seal Harbor                   | 0.12% |
| 193 | Perissodactyla, Rhinoceros Sumatran      | 0.12% |
| 194 | Primates, Lemur Ring-Tailed              | 0.12% |
| 195 | Squamata, Boa Constrictor                | 0.12% |
| 196 | Aves, Bird Secretary                     | 0.12% |
| 197 | Aves, Duck                               | 0.12% |
| 198 | Carnivora, Fox Arctic                    | 0.12% |
| 199 | Carnivora, Lynx                          | 0.12% |
| 200 | Perissodactyla, Tapir Malayan            | 0.12% |
| 201 | Primates, New World                      | 0.12% |
| 202 | Squamata, Python                         | 0.12% |
| 203 | Amphibia, Axolotl                        | 0.11% |
| 204 | Aves, Kea                                | 0.11% |
| 205 | Aves, Stork                              | 0.11% |
| 206 | Aves, Turaco                             | 0.11% |
| 207 | Primates, Lemur Red Ruffed               | 0.11% |
| 208 | Primates, Macaque                        | 0.11% |
| 209 | Rodentia, Rodent                         | 0.11% |
| 210 | Aves, Hornbill Southern Gound            | 0.11% |
| 211 | Chiroptera, Fox Flying                   | 0.11% |
| 212 | Crocodylia, Alligator Chinese            | 0.11% |
| 213 | Primates, Monkey Black-and-White Colobus | 0.11% |
| 214 | Artiodactyla, Pig                        | 0.10% |
| 215 | Aves, Crane Crowned                      | 0.10% |
| 216 | Aves, Stork Shoebill                     | 0.10% |
| 217 | Artiodactyla, Duiker                     | 0.10% |
| 218 | Artiodactyla, Peccary                    | 0.10% |
| 219 | Carnivora, Tiger Sumatran                | 0.10% |
| 220 | Marsupialia, Opossum                     | 0.10% |
| 221 | Artiodactyla, Elk                        | 0.10% |
| 222 | Aves, Macaw Hyacinth                     | 0.10% |
| 223 | Carnivora, Cat Black-Footed              | 0.10% |
| 224 | Carnivora, Raccoon                       | 0.10% |
| 225 | Chiroptera, Bat Fruit                    | 0.10% |

|     |                                  |       |
|-----|----------------------------------|-------|
| 226 | Primates, Old World              | 0.10% |
| 227 | Artiodactyla, Oryx Scimitar      | 0.09% |
| 228 | Pisces, Fish Sturgeon            | 0.09% |
| 229 | Primates, Lemur Sifaka           | 0.09% |
| 230 | Squamata, Cobra King             | 0.09% |
| 231 | Artiodactyla, Camel Bactrian     | 0.09% |
| 232 | Artiodactyla, Eland              | 0.09% |
| 233 | Artiodactyla, Gerenuk            | 0.09% |
| 234 | Aves, Parrot Kakapo              | 0.09% |
| 235 | Carnivora, Cat Bobcat            | 0.09% |
| 236 | Carnivora, Skunk                 | 0.09% |
| 237 | Invertebrate, Bee Honey          | 0.09% |
| 238 | Perissodactyla, Ass Somali Wild  | 0.09% |
| 239 | Primates, Loris                  | 0.09% |
| 240 | Primates, Tamarin Cotton Top     | 0.09% |
| 241 | Artiodactyla, Gazelle Dama       | 0.09% |
| 242 | Artiodactyla, Saola              | 0.09% |
| 243 | Aves, Swan                       | 0.09% |
| 244 | Carnivora, Bear Spectacled       | 0.09% |
| 245 | Carnivora, Caracal               | 0.09% |
| 246 | Carnivora, Coati                 | 0.09% |
| 247 | Carnivora, Hyena Spotted         | 0.09% |
| 248 | Primates, Langur                 | 0.09% |
| 249 | Squamata, Gecko                  | 0.09% |
| 250 | Artiodactyla, Antelope Sable     | 0.08% |
| 251 | Artiodactyla, Dik-Dik            | 0.08% |
| 252 | Artiodactyla, Goat               | 0.08% |
| 253 | Artiodactyla, Pig Visayan Warty  | 0.08% |
| 254 | Aves, Penguin King               | 0.08% |
| 255 | Aves, Vulture King               | 0.08% |
| 256 | Pisces, Fish Sea Dragon          | 0.08% |
| 257 | Rodentia, Porcupine Crested      | 0.08% |
| 258 | Amphibia, Salamander Giant       | 0.08% |
| 259 | Aves, Bird Tawny Frogmouth       | 0.08% |
| 260 | Aves, Ibis                       | 0.08% |
| 261 | Aves, Vulture African            | 0.08% |
| 262 | Carnivora, Dhole                 | 0.08% |
| 263 | Perissodactyla, Rhinoceros Javan | 0.08% |
| 264 | Pisces, Fish Eel                 | 0.08% |
| 265 | Pisces, Sawfish                  | 0.08% |
| 266 | Primates, Prosimian              | 0.08% |
| 267 | Aves, Hornbill Asian             | 0.07% |
| 268 | Aves, Hornbill Rhinoceros        | 0.07% |
| 269 | Aves, Owl Burrowing              | 0.07% |
| 270 | Invertebrate, Terrestrial        | 0.07% |
| 271 | Primates, Orangutan Sumatran     | 0.07% |
| 272 | Rhynchocephalia, Tuatara         | 0.07% |
| 273 | Aves, Bird Endangered            | 0.07% |

|     |                                        |       |
|-----|----------------------------------------|-------|
| 274 | Aves, Crane Red Crowned                | 0.07% |
| 275 | Carnivora, Sea Lion California         | 0.07% |
| 276 | Invertebrate, Anemone                  | 0.07% |
| 277 | Invertebrate, Scorpion                 | 0.07% |
| 278 | Pisces, Fish Clownfish                 | 0.07% |
| 279 | Primates, Callitrichids                | 0.07% |
| 280 | Primates, Gorilla Western Lowland      | 0.07% |
| 281 | Artiodactyla, Antelope African         | 0.07% |
| 282 | Artiodactyla, Caribou                  | 0.07% |
| 283 | Artiodactyla, Hoofstock Asian          | 0.07% |
| 284 | Aves, Kingfisher Guam                  | 0.07% |
| 285 | Aves, Shorebird                        | 0.07% |
| 286 | Aves, Stork Marabou                    | 0.07% |
| 287 | Aves, Stork Saddle Billed              | 0.07% |
| 288 | Cetacea, Cetacean                      | 0.07% |
| 289 | Chelonia, Turtle Alligator Snapping    | 0.07% |
| 290 | Chelonia, Turtle Snake-Necked          | 0.07% |
| 291 | Chiroptera, Bat Vampire                | 0.07% |
| 292 | Pisces, Fish Salt Water                | 0.07% |
| 293 | Primates, Lemur Black and White Ruffed | 0.07% |
| 294 | Squamata, Snake Endangered             | 0.07% |
| 295 | Aves, Owl Snowy                        | 0.06% |
| 296 | Chelonia, Turtle Asian                 | 0.06% |
| 297 | Hyracoidea, Hyrax                      | 0.06% |
| 298 | Invertebrate, Crab Horseshoe           | 0.06% |
| 299 | Primates, Ape Lesser                   | 0.06% |
| 300 | Primates, Gorilla Lowland Eastern      | 0.06% |
| 301 | Primates, Monkey Squirrel              | 0.06% |
| 302 | Squamata, Iguana Galapagos Marine      | 0.06% |
| 303 | Squamata, Monitor                      | 0.06% |
| 304 | Artiodactyla, Banteng                  | 0.06% |
| 305 | Artiodactyla, Deer Pere David          | 0.06% |
| 306 | Artiodactyla, Ibex                     | 0.06% |
| 307 | Artiodactyla, Impala                   | 0.06% |
| 308 | Artiodactyla, Oryx Arabian             | 0.06% |
| 309 | Artiodactyla, Ungulate                 | 0.06% |
| 310 | Aves, Bustard Kori                     | 0.06% |
| 311 | Aves, Cockatoo                         | 0.06% |
| 312 | Aves, Corvids                          | 0.06% |
| 313 | Aves, Eagle Steller's Sea              | 0.06% |
| 314 | Aves, Goose                            | 0.06% |
| 315 | Aves, Kingfisher                       | 0.06% |
| 316 | Aves, Lorikeets                        | 0.06% |
| 317 | Aves, Peafowl                          | 0.06% |
| 318 | Carnivora, Badger                      | 0.06% |
| 319 | Carnivora, Bear Asian                  | 0.06% |
| 320 | Carnivora, Coyote                      | 0.06% |
| 321 | Chelonia, Turtle Freshwater            | 0.06% |

|     |                                      |       |
|-----|--------------------------------------|-------|
| 322 | Chondrichthyes, Shark Sand Tiger     | 0.06% |
| 323 | Invertebrate, Insect Walking Stick   | 0.06% |
| 324 | Primates, Monkey African             | 0.06% |
| 325 | Primates, Monkey Saki                | 0.06% |
| 326 | Primates, Small                      | 0.06% |
| 327 | Squamata, Python Reticulated         | 0.06% |
| 328 | Squamata, Snake Giant                | 0.06% |
| 329 | Artiodactyla, Antelope Saiga         | 0.05% |
| 330 | Artiodactyla, Deer Pudu              | 0.05% |
| 331 | Artiodactyla, Giraffe Reticulated    | 0.05% |
| 332 | Artiodactyla, Sheep Bighorn          | 0.05% |
| 333 | Aves, Falcon                         | 0.05% |
| 334 | Aves, Penguin Antarctica             | 0.05% |
| 335 | Aves, Penguin Humboldt               | 0.05% |
| 336 | Aves, Rail Guam                      | 0.05% |
| 337 | Carnivora, Bear North American       | 0.05% |
| 338 | Carnivora, Dog Bush                  | 0.05% |
| 339 | Carnivora, Fox Red                   | 0.05% |
| 340 | Carnivora, Leopard African           | 0.05% |
| 341 | Chelonia, Tortoise Asian Forest      | 0.05% |
| 342 | Chondrichthyes, Ray Manta            | 0.05% |
| 343 | Invertebrate, Cephalopods            | 0.05% |
| 344 | Pisces, Fish Pufferfish              | 0.05% |
| 345 | Primates, Loris Slow                 | 0.05% |
| 346 | Sirenia, Dugong                      | 0.05% |
| 347 | Squamata, Snake Viper Gaboon         | 0.05% |
| 348 | Artiodactyla, Anoa                   | 0.05% |
| 349 | Artiodactyla, Hippopotamus Nile      | 0.05% |
| 350 | Artiodactyla, Sheep                  | 0.05% |
| 351 | Aves, Bee Eater                      | 0.05% |
| 352 | Aves, Dove                           | 0.05% |
| 353 | Aves, Owl Great Horned               | 0.05% |
| 354 | Aves, Penguin Rockhopper             | 0.05% |
| 355 | Chelonia, Tortoise Large             | 0.05% |
| 356 | Chelonia, Turtle Box                 | 0.05% |
| 357 | Insectivora, Shrew Elephant          | 0.05% |
| 358 | Insectivora, Tenrec                  | 0.05% |
| 359 | Marsupialia, Macropod                | 0.05% |
| 360 | Perissodactyla, Tapir Baird's        | 0.05% |
| 361 | Pisces, Fish Piranha                 | 0.05% |
| 362 | Pisces, Fish Salmon                  | 0.05% |
| 363 | Primates, Baby Bush                  | 0.05% |
| 364 | Primates, Monkey Colobus             | 0.05% |
| 365 | Rodentia, Porcupine North American   | 0.05% |
| 366 | Squamata, Lizard Monitor             | 0.05% |
| 367 | Squamata, Snake Eastern Indigo       | 0.05% |
| 368 | Amphibia, Toad Wyoming               | 0.05% |
| 369 | Artiodactyla, Gazelle Slender-Horned | 0.05% |

|     |                                          |       |
|-----|------------------------------------------|-------|
| 370 | Artiodactyla, Klipspringer               | 0.05% |
| 371 | Artiodactyla, Kudu Greater               | 0.05% |
| 372 | Artiodactyla, Llama                      | 0.05% |
| 373 | Artiodactyla, Ox Musk                    | 0.05% |
| 374 | Artiodactyla, Springbok                  | 0.05% |
| 375 | Aves, Bird North American Song           | 0.05% |
| 376 | Aves, Curassow                           | 0.05% |
| 377 | Aves, Owl Barn                           | 0.05% |
| 378 | Aves, Pheasant                           | 0.05% |
| 379 | Aves, Spoonbill                          | 0.05% |
| 380 | Aves, Weaver                             | 0.05% |
| 381 | Carnivora, Civet                         | 0.05% |
| 382 | Carnivora, Kinkajou                      | 0.05% |
| 383 | Cetacea, Dolphin Bottlenose              | 0.05% |
| 384 | Chelonia, Turtle Leatherback             | 0.05% |
| 385 | Crocodylia, Crocodile Cuban              | 0.05% |
| 386 | Crocodylia, Crocodile Tomistoma          | 0.05% |
| 387 | Perissodactyla, Horse                    | 0.05% |
| 388 | Perissodactyla, Zebra Hartman's Mountain | 0.05% |
| 389 | Pisces, Fish Moray Eel                   | 0.05% |
| 390 | Primates, Guenons                        | 0.05% |
| 391 | Primates, Monkey Owl                     | 0.05% |
| 392 | Primates, Orangutan Bornean              | 0.05% |
| 393 | Reptilia, Reptile Endangered             | 0.05% |
| 394 | Rodentia, Porcupine Prehensile Tailed    | 0.05% |
| 395 | Squamata, Gecko Leaf Tailed              | 0.05% |
| 396 | Amphibia, Frog Tropical Species          | 0.04% |
| 397 | Artiodactyla, Alpaca                     | 0.04% |
| 398 | Artiodactyla, Gaur                       | 0.04% |
| 399 | Artiodactyla, Markhor                    | 0.04% |
| 400 | Artiodactyla, Peccary Chacoan            | 0.04% |
| 401 | Aves, Chicken Prairie                    | 0.04% |
| 402 | Aves, Eagle Golden                       | 0.04% |
| 403 | Aves, Macaw Blue-Throated                | 0.04% |
| 404 | Aves, Owl Screech                        | 0.04% |
| 405 | Aves, Penguin Emperor                    | 0.04% |
| 406 | Aves, Swan Trumpeter                     | 0.04% |
| 407 | Carnivora, Puma Florida                  | 0.04% |
| 408 | Chelonia, Tortoise Gopher                | 0.04% |
| 409 | Chelonia, Turtle Green Sea               | 0.04% |
| 410 | Chelonia, Turtle Mata Mata               | 0.04% |
| 411 | Hyracoidea, Hyrax Rock                   | 0.04% |
| 412 | Insectivora, Hedgehog                    | 0.04% |
| 413 | Invertebrate, Beetle American Burying    | 0.04% |
| 414 | Pisces, Fish Endangered                  | 0.04% |
| 415 | Pisces, Fish Tuna                        | 0.04% |
| 416 | Primates, Endangered                     | 0.04% |
| 417 | Reptilia, Reptile and Amphibians         | 0.04% |

|     |                                     |       |
|-----|-------------------------------------|-------|
| 418 | Squamata, Snake Louisiana Pine      | 0.04% |
| 419 | Amphibia, Salamander Chinese Giant  | 0.04% |
| 420 | Amphibia, Salamander Giant Japanese | 0.04% |
| 421 | Artiodactyla, Bontebok              | 0.04% |
| 422 | Artiodactyla, Buffalo Water         | 0.04% |
| 423 | Artiodactyla, Deer Muntjac          | 0.04% |
| 424 | Artiodactyla, Duiker Yellow-Backed  | 0.04% |
| 425 | Artiodactyla, Gemsbok               | 0.04% |
| 426 | Aves, Bird Songbirds Asian          | 0.04% |
| 427 | Aves, Cockatoo Great Palm           | 0.04% |
| 428 | Aves, Falcon Peregrine              | 0.04% |
| 429 | Aves, Hammerkop                     | 0.04% |
| 430 | Aves, Owl Eurasian Eagle            | 0.04% |
| 431 | Aves, Penguin Temperate             | 0.04% |
| 432 | Aves, Rheas                         | 0.04% |
| 433 | Aves, Roadrunner                    | 0.04% |
| 434 | Carnivora, Felid Small              | 0.04% |
| 435 | Carnivora, Ferret                   | 0.04% |
| 436 | Carnivora, Fox Gray                 | 0.04% |
| 437 | Carnivora, Jackal                   | 0.04% |
| 438 | Carnivora, Jaguarundi               | 0.04% |
| 439 | Carnivora, Tiger Malayan            | 0.04% |
| 440 | Chondrichthyes, Cownose Ray         | 0.04% |
| 441 | Chondrichthyes, Shark Great White   | 0.04% |
| 442 | Invertebrate, Insect Endangered     | 0.04% |
| 443 | Invertebrate, Insect Stick Walking  | 0.04% |
| 444 | Invertebrate, Mussel Freshwater     | 0.04% |
| 445 | Perissodactyla, Donkey              | 0.04% |
| 446 | Pisces, Cichlid                     | 0.04% |
| 447 | Primates, Loris Pygmy Slow          | 0.04% |
| 448 | Primates, Macaque Japanese          | 0.04% |
| 449 | Primates, Monkey Asian              | 0.04% |
| 450 | Rodentia, Agouti                    | 0.04% |
| 451 | Xenarthra, Sloth Two-Toed           | 0.04% |
| 452 | Amphibia, Frog Rainforest           | 0.03% |
| 453 | Artiodactyla, Buffalo Cape          | 0.03% |
| 454 | Artiodactyla, Gazelle Thomsons      | 0.03% |
| 455 | Aves, Chicken                       | 0.03% |
| 456 | Aves, Crane Sandhill                | 0.03% |
| 457 | Aves, Heron                         | 0.03% |
| 458 | Aves, Macaw Spix's                  | 0.03% |
| 459 | Aves, Pigeon Nicobar                | 0.03% |
| 460 | Aves, Tern Inca                     | 0.03% |
| 461 | Aves, Vulture Turkey                | 0.03% |
| 462 | Carnivora, Badger Honey             | 0.03% |
| 463 | Carnivora, Canid Small              | 0.03% |
| 464 | Carnivora, Fisher                   | 0.03% |
| 465 | Cetacea, Narwhal                    | 0.03% |

|     |                                       |       |
|-----|---------------------------------------|-------|
| 466 | Chelonia, Aquatic Turtles             | 0.03% |
| 467 | Chelonia, Turtle Fly River            | 0.03% |
| 468 | Chondrichthyes, Elasmobranchs         | 0.03% |
| 469 | Crocodylia, Caiman                    | 0.03% |
| 470 | Invertebrate, Millipedes              | 0.03% |
| 471 | Primates, African                     | 0.03% |
| 472 | Primates, Capuchin                    | 0.03% |
| 473 | Primates, Tamarin Emperor             | 0.03% |
| 474 | Squamata, Iguana Grand Cayman Blue    | 0.03% |
| 475 | Squamata, Lizard Basilisk             | 0.03% |
| 476 | Squamata, Python Green Tree           | 0.03% |
| 477 | Squamata, Snake Hognose               | 0.03% |
| 478 | Amphibia, Caecilian                   | 0.03% |
| 479 | Amphibia, Toad Puerto Rican Crested   | 0.03% |
| 480 | Amphibia, Toad, Houston               | 0.03% |
| 481 | Artiodactyla, Gazelle Speke's         | 0.03% |
| 482 | Artiodactyla, Nyala                   | 0.03% |
| 483 | Aves, Cock-of-the-Rock                | 0.03% |
| 484 | Aves, Goose Red-Breasted              | 0.03% |
| 485 | Aves, Hornbill African Grey           | 0.03% |
| 486 | Aves, Hornbill Southern Ground        | 0.03% |
| 487 | Aves, Penguin Little                  | 0.03% |
| 488 | Aves, Pigeon Victoria Crowned         | 0.03% |
| 489 | Aves, Ratite Cassowary Double Wattled | 0.03% |
| 490 | Aves, Raven                           | 0.03% |
| 491 | Aves, Thrush Blue Crowned Laughing    | 0.03% |
| 492 | Carnivora, Felid                      | 0.03% |
| 493 | Carnivora, Fox Bat Eared              | 0.03% |
| 494 | Carnivora, Lynx Canadian              | 0.03% |
| 495 | Carnivora, Seal Hawaiian Monk         | 0.03% |
| 496 | Chelonia, Tortoise Pancake            | 0.03% |
| 497 | Chelonia, Turtle Blanding's           | 0.03% |
| 498 | Chelonia, Turtle Endangered           | 0.03% |
| 499 | Chelonia, Turtle Spotted              | 0.03% |
| 500 | Chiroptera, Bat North American        | 0.03% |
| 501 | Chondrichthyes, Shark Sandbar         | 0.03% |
| 502 | Crocodylia, Crocodile Saltwater       | 0.03% |
| 503 | Invertebrate, Cockroach Hissing       | 0.03% |
| 504 | Invertebrate, Mantids                 | 0.03% |
| 505 | Monotremata, Monotremes               | 0.03% |
| 506 | Perissodactyla, Ass Wild              | 0.03% |
| 507 | Perissodactyla, Tapir South America   | 0.03% |
| 508 | Pisces, Fish Cichlid African          | 0.03% |
| 509 | Pisces, Fish Eel Electric             | 0.03% |
| 510 | Pisces, Fish Humphead Wrasse          | 0.03% |
| 511 | Primates, Asian                       | 0.03% |
| 512 | Primates, Drill                       | 0.03% |
| 513 | Primates, Monkey Proboscis            | 0.03% |

|     |                                        |       |
|-----|----------------------------------------|-------|
| 514 | Squamata, Bushmaster                   | 0.03% |
| 515 | Squamata, Lizard Cayman                | 0.03% |
| 516 | Squamata, Lizard Frilled-Neck          | 0.03% |
| 517 | Squamata, Mamba Black                  | 0.03% |
| 518 | Squamata, Python Burmese               | 0.03% |
| 519 | Xenarthra, Armadillo Giant             | 0.03% |
| 520 | Amphibia, Amphibian South American     | 0.03% |
| 521 | Artiodactyla, Camelids                 | 0.03% |
| 522 | Artiodactyla, Duiker Blue              | 0.03% |
| 523 | Artiodactyla, Goat Domestic            | 0.03% |
| 524 | Artiodactyla, Goat Mountain            | 0.03% |
| 525 | Artiodactyla, Guanaco                  | 0.03% |
| 526 | Artiodactyla, Hoofstock North American | 0.03% |
| 527 | Artiodactyla, Waterbuck                | 0.03% |
| 528 | Aves, Aracari                          | 0.03% |
| 529 | Aves, Bird North American              | 0.03% |
| 530 | Aves, Bird Roller                      | 0.03% |
| 531 | Aves, Flamingo Chilean                 | 0.03% |
| 532 | Aves, Guineafowl                       | 0.03% |
| 533 | Aves, Kagu                             | 0.03% |
| 534 | Aves, Parrot African Grey              | 0.03% |
| 535 | Aves, Penguin Galapagos                | 0.03% |
| 536 | Aves, Penguin Gentoo                   | 0.03% |
| 537 | Aves, Pigeon                           | 0.03% |
| 538 | Aves, Tanager                          | 0.03% |
| 539 | Carnivora, Cheetah African             | 0.03% |
| 540 | Carnivora, Dingo                       | 0.03% |
| 541 | Carnivora, Felid Large                 | 0.03% |
| 542 | Carnivora, Tiger Bengal                | 0.03% |
| 543 | Chelonia, Tortoise Desert              | 0.03% |
| 544 | Chelonia, Tortoise Endangered          | 0.03% |
| 545 | Chelonia, Tortoise Ploughshare         | 0.03% |
| 546 | Chelonia, Turtle Bog                   | 0.03% |
| 547 | Chelonia, Turtle Snapping              | 0.03% |
| 548 | Chondrichthyes, Fresh Water Stingray   | 0.03% |
| 549 | Chondrichthyes, Ray Spotted Eagle      | 0.03% |
| 550 | Crocodylia, Gharial Indian             | 0.03% |
| 551 | Invertebrate, Aquatic Invertebrates    | 0.03% |
| 552 | Invertebrate, Snail Partula            | 0.03% |
| 553 | Pisces, Arapaima                       | 0.03% |
| 554 | Pisces, Cichlid Lake Victoria          | 0.03% |
| 555 | Pisces, Fish South American            | 0.03% |
| 556 | Primates, Gorilla Mountain             | 0.03% |
| 557 | Primates, Monkey Diana                 | 0.03% |
| 558 | Primates, Potto                        | 0.03% |
| 559 | Rodentia, Rat                          | 0.03% |
| 560 | Squamata, Iguana Fiji Banded           | 0.03% |
| 561 | Squamata, Lizard Horned                | 0.03% |

|     |                                        |       |
|-----|----------------------------------------|-------|
| 562 | Squamata, Skink                        | 0.03% |
| 563 | Squamata, Skink Prehensile Tailed      | 0.03% |
| 564 | Squamata, Snake King                   | 0.03% |
| 565 | Xenarthra, Armadillo Banded            | 0.03% |
| 566 | Xenarthra, Sloth Three-Toed            | 0.03% |
| 567 | Amphibia, Amphibian African            | 0.02% |
| 568 | Amphibia, Amphibian North American     | 0.02% |
| 569 | Artiodactyla, Buffalo African Savannah | 0.02% |
| 570 | Artiodactyla, Eland Giant              | 0.02% |
| 571 | Artiodactyla, Goral                    | 0.02% |
| 572 | Artiodactyla, Kudu Lesser              | 0.02% |
| 573 | Artiodactyla, Pig Wild                 | 0.02% |
| 574 | Artiodactyla, Vicuna                   | 0.02% |
| 575 | Aves, Albatross                        | 0.02% |
| 576 | Aves, Bird Sea                         | 0.02% |
| 577 | Aves, Crane Wattled                    | 0.02% |
| 578 | Aves, Eagle Philippine                 | 0.02% |
| 579 | Aves, Finch                            | 0.02% |
| 580 | Aves, Geese Nene                       | 0.02% |
| 581 | Aves, Hornbill Wrinkled                | 0.02% |
| 582 | Aves, Merganser Scaly Sided            | 0.02% |
| 583 | Aves, Owl Barred                       | 0.02% |
| 584 | Aves, Parrot Thick Billed              | 0.02% |
| 585 | Aves, Toucan Toco                      | 0.02% |
| 586 | Aves, Vulture Cinereous                | 0.02% |
| 587 | Aves, Vulture Old World                | 0.02% |
| 588 | Carnivora, Aardwolf                    | 0.02% |
| 589 | Carnivora, Margay                      | 0.02% |
| 590 | Cetacea, Dolphin Amazon River          | 0.02% |
| 591 | Chelonia, Chelonian                    | 0.02% |
| 592 | Chelonia, Tortoise Small               | 0.02% |
| 593 | Chelonia, Turtle Asian Box             | 0.02% |
| 594 | Chondrichthyes, Shark Nurse            | 0.02% |
| 595 | Chondrichthyes, Shark Small            | 0.02% |
| 596 | Crocodylia, Crocodile Slender Snout    | 0.02% |
| 597 | Crocodylia, Gharial False              | 0.02% |
| 598 | Invertebrate, Crab Giant Spider        | 0.02% |
| 599 | Invertebrate, Dragonflies              | 0.02% |
| 600 | Invertebrate, Lobster                  | 0.02% |
| 601 | Invertebrate, Nautilus Chambered       | 0.02% |
| 602 | Marsupialia, Kangaroo Red              | 0.02% |
| 603 | Perissodactyla, Horse Wild             | 0.02% |
| 604 | Pisces, Fish Bluefin Tuna              | 0.02% |
| 605 | Pisces, Fish Rockfish                  | 0.02% |
| 606 | Primates, Gibbon White Cheeked         | 0.02% |
| 607 | Primates, Lemur Indri                  | 0.02% |
| 608 | Primates, Lemur Mongoose               | 0.02% |
| 609 | Primates, Marmoset Pygmy               | 0.02% |

|     |                                          |       |
|-----|------------------------------------------|-------|
| 610 | Primates, Monkey DeBrazza                | 0.02% |
| 611 | Squamata, Lizard Endangered              | 0.02% |
| 612 | Squamata, Megafauna                      | 0.02% |
| 613 | Squamata, Python Ball                    | 0.02% |
| 614 | Squamata, Snake African                  | 0.02% |
| 615 | Squamata, Snake Aruba Island Rattlesnake | 0.02% |
| 616 | Squamata, Snake Large Constrictor        | 0.02% |
| 617 | Squamata, Snake Native Species           | 0.02% |
| 618 | Squamata, Snake Rainforest               | 0.02% |
| 619 | Amphibia, Amphibian Asia                 | 0.02% |
| 620 | Amphibia, Frog Glass                     | 0.02% |
| 621 | Amphibia, Salamander Giant Chinese       | 0.02% |
| 622 | Amphibia, Toad Kihansi Spray             | 0.02% |
| 623 | Artiodactyla, Antelope Roan              | 0.02% |
| 624 | Artiodactyla, Blackbuck                  | 0.02% |
| 625 | Artiodactyla, Cow                        | 0.02% |
| 626 | Artiodactyla, Deer Reindeer              | 0.02% |
| 627 | Artiodactyla, Hartbeest                  | 0.02% |
| 628 | Artiodactyla, Hirola                     | 0.02% |
| 629 | Artiodactyla, Ibex Nubian                | 0.02% |
| 630 | Artiodactyla, Sitatunga                  | 0.02% |
| 631 | Artiodactyla, Ungulate African           | 0.02% |
| 632 | Aves, Auks                               | 0.02% |
| 633 | Aves, Crane Asian                        | 0.02% |
| 634 | Aves, Crane Blue                         | 0.02% |
| 635 | Aves, Crane Grey Crowned                 | 0.02% |
| 636 | Aves, Crane Sarus                        | 0.02% |
| 637 | Aves, Crane White Naped                  | 0.02% |
| 638 | Aves, Curassow Blue-Billed               | 0.02% |
| 639 | Aves, Dove Bleeding Heart                | 0.02% |
| 640 | Aves, Dove Fruit                         | 0.02% |
| 641 | Aves, Duck Wood                          | 0.02% |
| 642 | Aves, Goose Nene                         | 0.02% |
| 643 | Aves, Ibis Waldrapp                      | 0.02% |
| 644 | Aves, Maleo                              | 0.02% |
| 645 | Aves, Motmot, Blue Crowned               | 0.02% |
| 646 | Aves, Parrot Hawk-Headed                 | 0.02% |
| 647 | Aves, Partridge Crested Wood             | 0.02% |
| 648 | Aves, Pelican Dalmatian                  | 0.02% |
| 649 | Aves, Penguin Macaroni                   | 0.02% |
| 650 | Aves, Pheasant Edwards                   | 0.02% |
| 651 | Aves, Spoonbill Roseate                  | 0.02% |
| 652 | Aves, Sunbittern                         | 0.02% |
| 653 | Aves, Vulture Asian                      | 0.02% |
| 654 | Aves, Vulture Lappet Faced               | 0.02% |
| 655 | Aves, Vulture New World                  | 0.02% |
| 656 | Aves, Vulture Ruppell                    | 0.02% |
| 657 | Aves, Vulture White Backed               | 0.02% |

|     |                                             |       |
|-----|---------------------------------------------|-------|
| 658 | Carnivora, Bear South American              | 0.02% |
| 659 | Carnivora, Dog Domestic                     | 0.02% |
| 660 | Carnivora, Fox Channel Island               | 0.02% |
| 661 | Carnivora, Fox Swift                        | 0.02% |
| 662 | Carnivora, Seal Elephant                    | 0.02% |
| 663 | Chelonia, Tortoise Egyptian                 | 0.02% |
| 664 | Chelonia, Turtle Kemps Ridley Sea           | 0.02% |
| 665 | Chelonia, Turtle Loggerhead Sea             | 0.02% |
| 666 | Chelonia, Turtle Western Pond               | 0.02% |
| 667 | Chelonia, Turtle Wood                       | 0.02% |
| 668 | Chiroptera, Bat Fruit Rodrigues             | 0.02% |
| 669 | Chondrichthyes, Ray Eagle                   | 0.02% |
| 670 | Chondrichthyes, Shark Blacktip Reef         | 0.02% |
| 671 | Chondrichthyes, Shark Hammerhead            | 0.02% |
| 672 | Chondrichthyes, Shark Large                 | 0.02% |
| 673 | Crocodylia, Crocodile Nile                  | 0.02% |
| 674 | Insectivora, Shrew Tree                     | 0.02% |
| 675 | Invertebrate, Butterfly Karner Blue         | 0.02% |
| 676 | Invertebrate, Cockroach                     | 0.02% |
| 677 | Invertebrate, Tarantula Blue Sapphire       | 0.02% |
| 678 | Lagomorpha, Pikas                           | 0.02% |
| 679 | Marsupialia, Kangaroo Rat                   | 0.02% |
| 680 | Marsupialia, Quokka                         | 0.02% |
| 681 | Perissodactyla, Equid Endangered            | 0.02% |
| 682 | Perissodactyla, Horse Asian Wild            | 0.02% |
| 683 | Pisces, Fish Deep Sea                       | 0.02% |
| 684 | Pisces, Fish Desert Pupfish                 | 0.02% |
| 685 | Pisces, Fish Parrot                         | 0.02% |
| 686 | Primates, Lemur Mouse                       | 0.02% |
| 687 | Primates, Tamarin Pied                      | 0.02% |
| 688 | Rodentia, Marmot Vancouver Island           | 0.02% |
| 689 | Rodentia, Rodent Large                      | 0.02% |
| 690 | Squamata, Boa Emerald Tree                  | 0.02% |
| 691 | Squamata, Iguana Caribbean                  | 0.02% |
| 692 | Squamata, Iguana Caribbean Rock             | 0.02% |
| 693 | Squamata, Lizard Chuckwalla                 | 0.02% |
| 694 | Squamata, Lizard Gila Monster               | 0.02% |
| 695 | Squamata, Lizard Tegu                       | 0.02% |
| 696 | Squamata, Mamba                             | 0.02% |
| 697 | Squamata, Monitor Komodo Dragon             | 0.02% |
| 698 | Squamata, Snake Viper Mang Mountain         | 0.02% |
| 699 | Squamata, Toad Horny                        | 0.02% |
| 700 | Xenarthra, Armadillo Brazilian Three-Banded | 0.02% |
| 701 | Amphibia, Bullfrog                          | 0.02% |
| 702 | Amphibia, Frog Tomato                       | 0.02% |
| 703 | Amphibia, Frog Yellow Legged Mountain       | 0.02% |
| 704 | Amphibia, Newt                              | 0.02% |
| 705 | Amphibia, Toad South American               | 0.02% |

|     |                                        |       |
|-----|----------------------------------------|-------|
| 706 | Artiodactyla, Bongo Mountain           | 0.02% |
| 707 | Artiodactyla, Cattle Domestic          | 0.02% |
| 708 | Artiodactyla, Deer Eld's               | 0.02% |
| 709 | Proboscidea, Elephant Sumatran         | 0.02% |
| 710 | Artiodactyla, Goat Wild                | 0.02% |
| 711 | Artiodactyla, Hoofstock South American | 0.02% |
| 712 | Artiodactyla, Lechwe Nile              | 0.02% |
| 713 | Artiodactyla, Oryx East African        | 0.02% |
| 714 | Artiodactyla, Sheep Barbary            | 0.02% |
| 715 | Aves, Bird Hawaiian                    | 0.02% |
| 716 | Aves, Bird Island                      | 0.02% |
| 717 | Aves, Bird Local                       | 0.02% |
| 718 | Aves, Bird Small                       | 0.02% |
| 719 | Aves, Booby Blue Footed                | 0.02% |
| 720 | Aves, Crane Demoiselle                 | 0.02% |
| 721 | Aves, Dove Jambu Fruit                 | 0.02% |
| 722 | Aves, Dove Mariana Fruit               | 0.02% |
| 723 | Aves, Duck Endangered                  | 0.02% |
| 724 | Aves, Duck Mandarin                    | 0.02% |
| 725 | Aves, Falcon African Pygmy             | 0.02% |
| 726 | Aves, Flamingo American                | 0.02% |
| 727 | Aves, Flamingo Lesser                  | 0.02% |
| 728 | Aves, Ibis Scarlet                     | 0.02% |
| 729 | Aves, Loon                             | 0.02% |
| 730 | Aves, Macaw Scarlet                    | 0.02% |
| 731 | Aves, Owl New World                    | 0.02% |
| 732 | Aves, Parrot Endangered                | 0.02% |
| 733 | Aves, Peafowl Green                    | 0.02% |
| 734 | Aves, Penguin Magellanic               | 0.02% |
| 735 | Aves, Pheasant Argus                   | 0.02% |
| 736 | Aves, Quetzal                          | 0.02% |
| 737 | Aves, Raptor Endangered                | 0.02% |
| 738 | Aves, Seriema                          | 0.02% |
| 739 | Aves, Vulture Bearded                  | 0.02% |
| 740 | Aves, Vulture Hooded                   | 0.02% |
| 741 | Carnivora, Arctic                      | 0.02% |
| 742 | Carnivora, Cat Big Asian               | 0.02% |
| 743 | Carnivora, Cat Medium                  | 0.02% |
| 744 | Carnivora, Felids                      | 0.02% |
| 745 | Carnivora, Ringtail                    | 0.02% |
| 746 | Carnivora, Seal Ribbon                 | 0.02% |
| 747 | Cetacea, Cetacean Small                | 0.02% |
| 748 | Chelonia, Tortoise African             | 0.02% |
| 749 | Chelonia, Tortoise Spider              | 0.02% |
| 750 | Chiroptera, Microbat                   | 0.02% |
| 751 | Chondrichthyes, Ray Freshwater         | 0.02% |
| 752 | Crocodylia, Caiman Dwarf               | 0.02% |
| 753 | Crocodylia, Crocodile Siamese          | 0.02% |

|     |                                             |       |
|-----|---------------------------------------------|-------|
| 754 | Crocodylia, Crocodylia                      | 0.02% |
| 755 | Invertebrate, Bumblebee                     | 0.02% |
| 756 | Invertebrate, Butterfly Endangered          | 0.02% |
| 757 | Invertebrate, Centipedes                    | 0.02% |
| 758 | Invertebrate, Clam Giant                    | 0.02% |
| 759 | Invertebrate, Crab Coconut                  | 0.02% |
| 760 | Invertebrate, Crayfish                      | 0.02% |
| 761 | Invertebrate, Insect Lord Howe Island Stick | 0.02% |
| 762 | Invertebrate, Native                        | 0.02% |
| 763 | Invertebrate, Spider Goliath Birdeater      | 0.02% |
| 764 | Mammalia, Mammal Australian                 | 0.02% |
| 765 | Mammalia, Mammal Endangered                 | 0.02% |
| 766 | Marsupialia, Kangaroo Grey                  | 0.02% |
| 767 | Marsupialia, Marsupial Small                | 0.02% |
| 768 | Marsupialia, Possum                         | 0.02% |
| 769 | Perissodactyla, Rhinoceros Asian            | 0.02% |
| 770 | Pisces, Arrowana                            | 0.02% |
| 771 | Pisces, Fish Archer                         | 0.02% |
| 772 | Pisces, Fish Banggai Cardinal               | 0.02% |
| 773 | Pisces, Fish Caribbean Reef                 | 0.02% |
| 774 | Pisces, Fish Cold Water                     | 0.02% |
| 775 | Pisces, Fish Lionfish                       | 0.02% |
| 776 | Pisces, Fish Local                          | 0.02% |
| 777 | Pisces, Fish Sturgeon Lake                  | 0.02% |
| 778 | Pisces, Guitarfish Bowmouth                 | 0.02% |
| 779 | Pisces, Paddlefish                          | 0.02% |
| 780 | Primates, Cebids                            | 0.02% |
| 781 | Primates, Gelada                            | 0.02% |
| 782 | Primates, Monkey Swamp Allen's              | 0.02% |
| 783 | Primates, Monkey Titi                       | 0.02% |
| 784 | Primates, Monkey Yellow-Tailed Woolly       | 0.02% |
| 785 | Primates, Nocturnal                         | 0.02% |
| 786 | Primates, Prosimian Nocturnal               | 0.02% |
| 787 | Reptilia, Reptile South American            | 0.02% |
| 788 | Reptilia, Reptile Venomous                  | 0.02% |
| 789 | Rodentia, Chinchilla                        | 0.02% |
| 790 | Rodentia, Marmot                            | 0.02% |
| 791 | Rodentia, Rat Cloud                         | 0.02% |
| 792 | Squamata, Boa Jamaican                      | 0.02% |
| 793 | Squamata, Boa Rainbow                       | 0.02% |
| 794 | Squamata, Copperhead                        | 0.02% |
| 795 | Squamata, Dragon Bearded                    | 0.02% |
| 796 | Squamata, Iguana Rhinoceros                 | 0.02% |
| 797 | Squamata, Lizard Desert Horned              | 0.02% |
| 798 | Squamata, Lizard Glass                      | 0.02% |
| 799 | Squamata, Lizard Large                      | 0.02% |
| 800 | Squamata, Lizard Small                      | 0.02% |
| 801 | Squamata, Mamba Green                       | 0.02% |

|     |                                              |       |
|-----|----------------------------------------------|-------|
| 802 | Squamata, Monitor Crocodile                  | 0.02% |
| 803 | Squamata, Snake Coral                        | 0.02% |
| 804 | Squamata, Snake Rat                          | 0.02% |
| 805 | Squamata, Snake South American Non-Venomous) | 0.02% |
| 806 | Amphibia, Salamander Aquatic Siren           | 0.01% |
| 807 | Amphibia, Salamander Endangered              | 0.01% |
| 808 | Artiodactyla, Antelope Asian                 | 0.01% |
| 809 | Artiodactyla, Blesbok                        | 0.01% |
| 810 | Artiodactyla, Camel Dromedary                | 0.01% |
| 811 | Artiodactyla, Cattle Wild                    | 0.01% |
| 812 | Artiodactyla, Deer Asian                     | 0.01% |
| 813 | Artiodactyla, Deer Mouse-Deer                | 0.01% |
| 814 | Artiodactyla, Deer Tufted                    | 0.01% |
| 815 | Artiodactyla, Duiker Jentink's               | 0.01% |
| 816 | Artiodactyla, Duiker Zebra                   | 0.01% |
| 817 | Artiodactyla, Giraffe Masai                  | 0.01% |
| 818 | Artiodactyla, Goat Rocky Mountain            | 0.01% |
| 819 | Artiodactyla, Pig Endangered                 | 0.01% |
| 820 | Artiodactyla, Takin Sichuan                  | 0.01% |
| 821 | Aves, Barbet, Bearded                        | 0.01% |
| 822 | Aves, Bird Exotic                            | 0.01% |
| 823 | Aves, Bird Fairy Bluebird                    | 0.01% |
| 824 | Aves, Bird Large                             | 0.01% |
| 825 | Aves, Bird Large Flightless                  | 0.01% |
| 826 | Aves, Bird Lyre                              | 0.01% |
| 827 | Aves, Bird Migratory                         | 0.01% |
| 828 | Aves, Bird Mynah                             | 0.01% |
| 829 | Aves, Bird Songbirds Endangered              | 0.01% |
| 830 | Aves, Bird Songbirds Native                  | 0.01% |
| 831 | Aves, Bird Songbirds South American          | 0.01% |
| 832 | Aves, Crane Saurus                           | 0.01% |
| 833 | Aves, Crow                                   | 0.01% |
| 834 | Aves, Cuckoos Guira                          | 0.01% |
| 835 | Aves, Curassow Wattled                       | 0.01% |
| 836 | Aves, Dove Socorro                           | 0.01% |
| 837 | Aves, Duck West Indian Whistling             | 0.01% |
| 838 | Aves, Duck White-Winged Wood                 | 0.01% |
| 839 | Aves, Eagle Bateluer                         | 0.01% |
| 840 | Aves, Flamingo Caribbean                     | 0.01% |
| 841 | Aves, Flamingo Greater                       | 0.01% |
| 842 | Aves, Grouse Sage                            | 0.01% |
| 843 | Aves, Hawk Red Tail                          | 0.01% |
| 844 | Aves, Hoatzin                                | 0.01% |
| 845 | Aves, Hornbill Endangered                    | 0.01% |
| 846 | Aves, Hornbill Helmeted                      | 0.01% |
| 847 | Aves, Jays Green                             | 0.01% |
| 848 | Aves, Kestrel                                | 0.01% |
| 849 | Aves, Lapwing                                | 0.01% |

|     |                                     |       |
|-----|-------------------------------------|-------|
| 850 | Aves, Lorikeet Rainbow              | 0.01% |
| 851 | Aves, Oropendula                    | 0.01% |
| 852 | Aves, Owl Great Grey                | 0.01% |
| 853 | Aves, Owl Northern Spotted          | 0.01% |
| 854 | Aves, Parrot Grey                   | 0.01% |
| 855 | Aves, Passerine South American      | 0.01% |
| 856 | Aves, Pheasant Endangered           | 0.01% |
| 857 | Aves, Pheasant Palawan Peacock      | 0.01% |
| 858 | Aves, Pigeon Crowned                | 0.01% |
| 859 | Aves, Pigeon Tooth-Billed           | 0.01% |
| 860 | Aves, Plover                        | 0.01% |
| 861 | Aves, Plover Piping                 | 0.01% |
| 862 | Aves, Pochard Baers                 | 0.01% |
| 863 | Aves, Quetzal Resplendent           | 0.01% |
| 864 | Aves, Roller Lilac Breasted         | 0.01% |
| 865 | Aves, Screamer                      | 0.01% |
| 866 | Aves, Screamer Crested              | 0.01% |
| 867 | Aves, Starling Emerald              | 0.01% |
| 868 | Aves, Starling Gold Breasted        | 0.01% |
| 869 | Aves, Stork White                   | 0.01% |
| 870 | Aves, Tinamou                       | 0.01% |
| 871 | Aves, Toucan Keel Billed            | 0.01% |
| 872 | Aves, Tragopan                      | 0.01% |
| 873 | Aves, Vulture Egyptian              | 0.01% |
| 874 | Aves, Weaver African                | 0.01% |
| 875 | Carnivora, American                 | 0.01% |
| 876 | Carnivora, Cat Big African          | 0.01% |
| 877 | Carnivora, Cat Small Endangered     | 0.01% |
| 878 | Carnivora, Cat South American       | 0.01% |
| 879 | Carnivora, Dog Raccoon Japanese     | 0.01% |
| 880 | Carnivora, Hyena Brown              | 0.01% |
| 881 | Carnivora, Hyena Striped            | 0.01% |
| 882 | Carnivora, Leopard Asian            | 0.01% |
| 883 | Carnivora, Otter Asian              | 0.01% |
| 884 | Carnivora, Otter, Neotropical River | 0.01% |
| 885 | Carnivora, Sea Lion Steller         | 0.01% |
| 886 | Carnivora, Seal Fur                 | 0.01% |
| 887 | Carnivora, Skunk Striped            | 0.01% |
| 888 | Carnivora, Tayra                    | 0.01% |
| 889 | Carnivora, Walrus Pacific           | 0.01% |
| 890 | Carnivora, Wolf North American      | 0.01% |
| 891 | Cetacea, Whale Blue                 | 0.01% |
| 892 | Chelonia, Terrapin                  | 0.01% |
| 893 | Chelonia, Terrapin Diamond Back     | 0.01% |
| 894 | Chelonia, Tortoise African Spurred  | 0.01% |
| 895 | Chelonia, Tortoise Indian Star      | 0.01% |
| 896 | Chelonia, Turtle African            | 0.01% |
| 897 | Chelonia, Turtle Coahuilan Box      | 0.01% |

|     |                                           |       |
|-----|-------------------------------------------|-------|
| 898 | Chelonia, Turtle Diamond Back             | 0.01% |
| 899 | Chelonia, Turtle Hawksbill                | 0.01% |
| 900 | Chelonia, Turtle North American           | 0.01% |
| 901 | Chelonia, Turtle Roti Island Snake-Necked | 0.01% |
| 902 | Chelonia, Turtle Soft Shell               | 0.01% |
| 903 | Chelonia, Turtle South America            | 0.01% |
| 904 | Chiroptera, Bat Fox Indian Flying         | 0.01% |
| 905 | Chondrichthyes, Ray Mobula                | 0.01% |
| 906 | Chondrichthyes, Shark Angel               | 0.01% |
| 907 | Chondrichthyes, Shark Basking             | 0.01% |
| 908 | Chondrichthyes, Shark Endangered          | 0.01% |
| 909 | Chondrichthyes, Shark Tiger               | 0.01% |
| 910 | Crocodylia, Crocodile Dwarf               | 0.01% |
| 911 | Crocodylia, Crocodile Orinoco             | 0.01% |
| 912 | Crocodylia, Crocodile Philippine          | 0.01% |
| 913 | Insectivora, Shrew                        | 0.01% |
| 914 | Invertebrate, Centipede Giant             | 0.01% |
| 915 | Invertebrate, Crab Hermit                 | 0.01% |
| 916 | Invertebrate, Cucumber Sea                | 0.01% |
| 917 | Invertebrate, Grasshopper                 | 0.01% |
| 918 | Invertebrate, Insect Pollinating          | 0.01% |
| 919 | Invertebrate, Millipedes Giant            | 0.01% |
| 920 | Invertebrate, Oyster                      | 0.01% |
| 921 | Invertebrate, Shrimp Mantis               | 0.01% |
| 922 | Mammalia, Mammal Desert                   | 0.01% |
| 923 | Marsupialia, Koala Queensland             | 0.01% |
| 924 | Marsupialia, Numbat                       | 0.01% |
| 925 | Marsupialia, Quoll                        | 0.01% |
| 926 | Marsupialia, Wallaby Red-Necked           | 0.01% |
| 927 | Marsupialia, Wallaby Tammar               | 0.01% |
| 928 | Marsupialia, Wallaroo                     | 0.01% |
| 929 | Perissodactyla, Tapir Asian               | 0.01% |
| 930 | Pisces, Arrowana Asian                    | 0.01% |
| 931 | Pisces, Fish African                      | 0.01% |
| 932 | Pisces, Fish Bony                         | 0.01% |
| 933 | Pisces, Fish Butterflyfish                | 0.01% |
| 934 | Pisces, Fish Coelacanth                   | 0.01% |
| 935 | Pisces, Fish Darter                       | 0.01% |
| 936 | Pisces, Fish Drum Red                     | 0.01% |
| 937 | Pisces, Fish Eel Wolf                     | 0.01% |
| 938 | Pisces, Fish Goliath Grouper              | 0.01% |
| 939 | Pisces, Fish Lungfish                     | 0.01% |
| 940 | Pisces, Fish Pacu                         | 0.01% |
| 941 | Pisces, Fish Rainbowfish                  | 0.01% |
| 942 | Pisces, Fish South American Freshwater    | 0.01% |
| 943 | Pisces, Fish Sun                          | 0.01% |
| 944 | Pisces, Fish Threatened                   | 0.01% |
| 945 | Pisces, Ocean Sunfish                     | 0.01% |

|     |                                                 |       |
|-----|-------------------------------------------------|-------|
| 946 | Primates, Baboon Gelada                         | 0.01% |
| 947 | Primates, Baboon Old World                      | 0.01% |
| 948 | Primates, Gibbon White Handed                   | 0.01% |
| 949 | Primates, Large                                 | 0.01% |
| 950 | Primates, Lemur Collared Brown                  | 0.01% |
| 951 | Primates, Macaque Sulawesi                      | 0.01% |
| 952 | Primates, Marmoset Goeldi's                     | 0.01% |
| 953 | Primates, Monkey Angolan Colobus                | 0.01% |
| 954 | Primates, Monkey Bald Uakari                    | 0.01% |
| 955 | Primates, Monkey Capuchin                       | 0.01% |
| 956 | Primates, Monkey Rainforest                     | 0.01% |
| 957 | Primates, Monkey Wolf Guenon                    | 0.01% |
| 958 | Primates, Prosimian Endangered                  | 0.01% |
| 959 | Primates, Rainforest                            | 0.01% |
| 960 | Primates, Tarsier                               | 0.01% |
| 961 | Reptilia, Reptile African                       | 0.01% |
| 962 | Reptilia, Reptile Desert                        | 0.01% |
| 963 | Reptilia, Reptile North American                | 0.01% |
| 964 | Reptilia, Reptile Rainforest                    | 0.01% |
| 965 | Rodentia, Cavy                                  | 0.01% |
| 966 | Rodentia, Cavy Patagonian                       | 0.01% |
| 967 | Rodentia, Rodent Endangered                     | 0.01% |
| 968 | Rodentia, Squirrel                              | 0.01% |
| 969 | Squamata, Anaconda Green                        | 0.01% |
| 970 | Squamata, Anaconda Yellow                       | 0.01% |
| 971 | Squamata, Cobra Spectacled                      | 0.01% |
| 972 | Squamata, Galliwasp Haitian                     | 0.01% |
| 973 | Squamata, Gecko Crested                         | 0.01% |
| 974 | Squamata, Gecko Day                             | 0.01% |
| 975 | Squamata, Iguana Spiny Tailed                   | 0.01% |
| 976 | Squamata, Lizard Southern Alligator             | 0.01% |
| 977 | Squamata, Lizard Threatened                     | 0.01% |
| 978 | Squamata, Lizard Tropical                       | 0.01% |
| 979 | Squamata, Megafauna Charismatic                 | 0.01% |
| 980 | Squamata, Monitor Emerald Tree                  | 0.01% |
| 981 | Squamata, Monitor Tree                          | 0.01% |
| 982 | Squamata, Python Large                          | 0.01% |
| 983 | Squamata, Sea Snake                             | 0.01% |
| 984 | Squamata, Snake Adder Puff                      | 0.01% |
| 985 | Squamata, Snake Asian                           | 0.01% |
| 986 | Squamata, Snake Desert                          | 0.01% |
| 987 | Squamata, Snake Eastern Diamondback Rattlesnake | 0.01% |
| 988 | Squamata, Snake Milk Snake                      | 0.01% |
| 989 | Squamata, Snake North America                   | 0.01% |
| 990 | Squamata, Snake Viper Armenian                  | 0.01% |
| 991 | Squamata, Snake Viper Eyelash                   | 0.01% |
| 992 | Xenarthra, Pangolin Tree White Bellied          | 0.01% |
| 993 | Xenarthra, Sloth Pygmy Three-Toed               | 0.01% |

|      |                                     |       |
|------|-------------------------------------|-------|
| 994  | Amphibia, Amphibian Central America | 0.01% |
| 995  | Amphibia, Chytrid Fungus            | 0.01% |
| 996  | Amphibia, Frog Effected Chytrid     | 0.01% |
| 997  | Amphibia, Frog Goliath              | 0.01% |
| 998  | Amphibia, Frog Lake Titicaca        | 0.01% |
| 999  | Amphibia, Frog Mantella             | 0.01% |
| 1000 | Amphibia, Frog Purple               | 0.01% |
| 1001 | Amphibia, Frog Threatened Species   | 0.01% |
| 1002 | Amphibia, Mantella Golden           | 0.01% |
| 1003 | Amphibia, Salamander Barton Springs | 0.01% |
| 1004 | Amphibia, Salamander New            | 0.01% |
| 1005 | Amphibia, Salamander Tiger          | 0.01% |
| 1006 | Amphibia, Toad Stubfoot             | 0.01% |
| 1007 | Artiodactyla, Antelope Tibetan      | 0.01% |
| 1008 | Artiodactyla, Bighorn Desert        | 0.01% |
| 1009 | Artiodactyla, Bovidae               | 0.01% |
| 1010 | Artiodactyla, Bovidae Endangered    | 0.01% |
| 1011 | Artiodactyla, Camel Wild Bactrian   | 0.01% |
| 1012 | Artiodactyla, Cattle Ankole         | 0.01% |
| 1013 | Artiodactyla, Cattle Endangered     | 0.01% |
| 1014 | Artiodactyla, Cattle Watasi         | 0.01% |
| 1015 | Artiodactyla, Chevrotain Malayan    | 0.01% |
| 1016 | Artiodactyla, Deer African          | 0.01% |
| 1017 | Artiodactyla, Deer Endangered       | 0.01% |
| 1018 | Artiodactyla, Deer Huemul           | 0.01% |
| 1019 | Artiodactyla, Deer Large            | 0.01% |
| 1020 | Artiodactyla, Deer Sika             | 0.01% |
| 1021 | Artiodactyla, Deer Small            | 0.01% |
| 1022 | Artiodactyla, Dik-Dik Kirks         | 0.01% |
| 1023 | Proboscidea, Elephant Indian        | 0.01% |
| 1024 | Artiodactyla, Elk American          | 0.01% |
| 1025 | Artiodactyla, Gazelle Endangered    | 0.01% |
| 1026 | Artiodactyla, Gazelle Mountain      | 0.01% |
| 1027 | Artiodactyla, Goat American Pygmy   | 0.01% |
| 1028 | Artiodactyla, Hoof Endangered       | 0.01% |
| 1029 | Artiodactyla, Mouflon               | 0.01% |
| 1030 | Artiodactyla, Nilgai                | 0.01% |
| 1031 | Artiodactyla, Pig African           | 0.01% |
| 1032 | Artiodactyla, Pig Asian             | 0.01% |
| 1033 | Artiodactyla, Pig Babirusa          | 0.01% |
| 1034 | Artiodactyla, Pig Javan Warty       | 0.01% |
| 1035 | Artiodactyla, Puku                  | 0.01% |
| 1036 | Artiodactyla, Sheep Dall            | 0.01% |
| 1037 | Artiodactyla, Sheep Domestic        | 0.01% |
| 1038 | Artiodactyla, Sheep Mountain        | 0.01% |
| 1039 | Artiodactyla, Tamaraw               | 0.01% |
| 1040 | Artiodactyla, Topi                  | 0.01% |
| 1041 | Artiodactyla, Tragelaphines         | 0.01% |

|      |                                      |       |
|------|--------------------------------------|-------|
| 1042 | Artiodactyla, Ungulate Asian         | 0.01% |
| 1043 | Artiodactyla, Ungulate Endangered    | 0.01% |
| 1044 | Artiodactyla, Ungulate North America | 0.01% |
| 1045 | Artiodactyla, Ungulate South America | 0.01% |
| 1046 | Artiodactyla, Yak                    | 0.01% |
| 1047 | Artiodactyla, Zebu                   | 0.01% |
| 1048 | Aves, Auklet                         | 0.01% |
| 1049 | Aves, Barbet                         | 0.01% |
| 1050 | Aves, Bird European                  | 0.01% |
| 1051 | Aves, Bird Flightless                | 0.01% |
| 1052 | Aves, Bird Forest                    | 0.01% |
| 1053 | Aves, Bird Mousebird                 | 0.01% |
| 1054 | Aves, Bird Native                    | 0.01% |
| 1055 | Aves, Bird Of Prey Rehabilitated     | 0.01% |
| 1056 | Aves, Bird Pelagic                   | 0.01% |
| 1057 | Aves, Bird Pollinator                | 0.01% |
| 1058 | Aves, Bird Savanna                   | 0.01% |
| 1059 | Aves, Bird Shore Endangered          | 0.01% |
| 1060 | Aves, Bird Songbirds Colorful        | 0.01% |
| 1061 | Aves, Bird Sunbird                   | 0.01% |
| 1062 | Aves, Bird White-Eyes                | 0.01% |
| 1063 | Aves, Bird White-Eyes Golden         | 0.01% |
| 1064 | Aves, Budgerigar                     | 0.01% |
| 1065 | Aves, Cockatoo Moluccan              | 0.01% |
| 1066 | Aves, Condor Endangered              | 0.01% |
| 1067 | Aves, Condor North American          | 0.01% |
| 1068 | Aves, Cormorant                      | 0.01% |
| 1069 | Aves, Crane Siberian                 | 0.01% |
| 1070 | Aves, Cuckoos                        | 0.01% |
| 1071 | Aves, Curassow Endangered            | 0.01% |
| 1072 | Aves, Curassow Helmeted              | 0.01% |
| 1073 | Aves, Duck Dabbling                  | 0.01% |
| 1074 | Aves, Duck Harlequin                 | 0.01% |
| 1075 | Aves, Duck Mallard                   | 0.01% |
| 1076 | Aves, Duck Sea                       | 0.01% |
| 1077 | Aves, Duck White-Faced Whistling     | 0.01% |
| 1078 | Aves, Eagle Fish                     | 0.01% |
| 1079 | Aves, Eider Spectacled               | 0.01% |
| 1080 | Aves, Finch Gouldian                 | 0.01% |
| 1081 | Aves, Flamingo Endangered            | 0.01% |
| 1082 | Aves, Frogmouth                      | 0.01% |
| 1083 | Aves, Guan Horned                    | 0.01% |
| 1084 | Aves, Hawk Harris                    | 0.01% |
| 1085 | Aves, Honeycreeper                   | 0.01% |
| 1086 | Aves, Hornbill Arboreal              | 0.01% |
| 1087 | Aves, Hornbill Great                 | 0.01% |
| 1088 | Aves, Hornbill Great Indian          | 0.01% |
| 1089 | Aves, Hornbill Ground                | 0.01% |

|      |                                |       |
|------|--------------------------------|-------|
| 1090 | Aves, Ibis Giant               | 0.01% |
| 1091 | Aves, Ibis Northern Bald       | 0.01% |
| 1092 | Aves, Jays                     | 0.01% |
| 1093 | Aves, Jays Florida Scrub       | 0.01% |
| 1094 | Aves, Macaw Endangered         | 0.01% |
| 1095 | Aves, Magpie                   | 0.01% |
| 1096 | Aves, Magpie Java Green        | 0.01% |
| 1097 | Aves, Megapode                 | 0.01% |
| 1098 | Aves, Osprey                   | 0.01% |
| 1099 | Aves, Owl Eastern Screech      | 0.01% |
| 1100 | Aves, Owl Endangered           | 0.01% |
| 1101 | Aves, Owl Northern Saw-Whet    | 0.01% |
| 1102 | Aves, Owl Old World            | 0.01% |
| 1103 | Aves, Owl Short-Eared          | 0.01% |
| 1104 | Aves, Owl Western Screech      | 0.01% |
| 1105 | Aves, Parrot African           | 0.01% |
| 1106 | Aves, Parrot Australian        | 0.01% |
| 1107 | Aves, Parrot Caribbean         | 0.01% |
| 1108 | Aves, Parrot Puerto Rican      | 0.01% |
| 1109 | Aves, Parrot Small             | 0.01% |
| 1110 | Aves, Passerine North American | 0.01% |
| 1111 | Aves, Pelican Brown            | 0.01% |
| 1112 | Aves, Pelican Great White      | 0.01% |
| 1113 | Aves, Pelican Pink-Backed      | 0.01% |
| 1114 | Aves, Penguin Adelie           | 0.01% |
| 1115 | Aves, Penguin Endangered       | 0.01% |
| 1116 | Aves, Penguin South American   | 0.01% |
| 1117 | Aves, Penguin Yellow-Eyed      | 0.01% |
| 1118 | Aves, Pheasant Golden          | 0.01% |
| 1119 | Aves, Pheasant Himalayan Monal | 0.01% |
| 1120 | Aves, Pheasant Reeve's         | 0.01% |
| 1121 | Aves, Pigeon Pink              | 0.01% |
| 1122 | Aves, Plover Snowy             | 0.01% |
| 1123 | Aves, Puffin Atlantic          | 0.01% |
| 1124 | Aves, Quail                    | 0.01% |
| 1125 | Aves, Raptor North American    | 0.01% |
| 1126 | Aves, Roller Blue Bellied      | 0.01% |
| 1127 | Aves, Sparrow Grasshopper      | 0.01% |
| 1128 | Aves, Spoonbill African        | 0.01% |
| 1129 | Aves, Spoonbill Sandpiper      | 0.01% |
| 1130 | Aves, Starling                 | 0.01% |
| 1131 | Aves, Starling Violet Backed   | 0.01% |
| 1132 | Aves, Stork African            | 0.01% |
| 1133 | Aves, Stork Endangered         | 0.01% |
| 1134 | Aves, Swan Black               | 0.01% |
| 1135 | Aves, Tanager Paradise         | 0.01% |
| 1136 | Aves, Tern                     | 0.01% |
| 1137 | Aves, Tragopan Cabot's         | 0.01% |

|      |                                        |       |
|------|----------------------------------------|-------|
| 1138 | Aves, Turaco Great Blue                | 0.01% |
| 1139 | Aves, Turaco Lady Ross                 | 0.01% |
| 1140 | Aves, Vulture Black Eurasian           | 0.01% |
| 1141 | Aves, Vulture Griffon                  | 0.01% |
| 1142 | Aves, Warbler                          | 0.01% |
| 1143 | Aves, Waterfowl North American         | 0.01% |
| 1144 | Carnivora, Canid Endangered            | 0.01% |
| 1145 | Carnivora, Canid Large                 | 0.01% |
| 1146 | Carnivora, Cat Geoffroy's              | 0.01% |
| 1147 | Carnivora, Cat Serval                  | 0.01% |
| 1148 | Carnivora, Cat Small African           | 0.01% |
| 1149 | Carnivora, Cat Small Asian             | 0.01% |
| 1150 | Carnivora, Cat Small Wild              | 0.01% |
| 1151 | Carnivora, Felid Endangered            | 0.01% |
| 1152 | Carnivora, Fox Eastern America Red     | 0.01% |
| 1153 | Carnivora, Genet                       | 0.01% |
| 1154 | Carnivora, Lion Asian                  | 0.01% |
| 1155 | Carnivora, Lynx Iberian                | 0.01% |
| 1156 | Carnivora, Mink                        | 0.01% |
| 1157 | Carnivora, Otter Spot Necked           | 0.01% |
| 1158 | Carnivora, Seal Bearded                | 0.01% |
| 1159 | Carnivora, Seal Grey                   | 0.01% |
| 1160 | Carnivora, Seal Northern Fur           | 0.01% |
| 1161 | Carnivora, Seal Ringed                 | 0.01% |
| 1162 | Carnivora, Wolf Timber                 | 0.01% |
| 1163 | Carnivora, Wolverine North American    | 0.01% |
| 1164 | Cetacea, Dolphin Endangered            | 0.01% |
| 1165 | Cetacea, Dolphin Pacific Whited-Sided  | 0.01% |
| 1166 | Cetacea, Porpoise Yangtze Finless      | 0.01% |
| 1167 | Cetacea, Whale Fin                     | 0.01% |
| 1168 | Cetacea, Whale Humpback                | 0.01% |
| 1169 | Cetacea, Whale Sperm                   | 0.01% |
| 1170 | Chelonia, Aquatic Endangered Turtles   | 0.01% |
| 1171 | Chelonia, Chelonian Native             | 0.01% |
| 1172 | Chelonia, Terrapin Northern River      | 0.01% |
| 1173 | Chelonia, Tortoise Flat-Backed Spider  | 0.01% |
| 1174 | Chelonia, Tortoise Red-Footed          | 0.01% |
| 1175 | Chelonia, Tortoise Sulcata             | 0.01% |
| 1176 | Chelonia, Tortoise Threatened          | 0.01% |
| 1177 | Chelonia, Turtle Batagur               | 0.01% |
| 1178 | Chelonia, Turtle Black-Breasted Leaf   | 0.01% |
| 1179 | Chelonia, Turtle Galapagos             | 0.01% |
| 1180 | Chelonia, Turtle Madagascar Big-Headed | 0.01% |
| 1181 | Chelonia, Turtle Marine                | 0.01% |
| 1182 | Chelonia, Turtle Pig-Nosed             | 0.01% |
| 1183 | Chelonia, Turtle Pond                  | 0.01% |
| 1184 | Chelonia, Turtle Rescued Sea           | 0.01% |
| 1185 | Chiroptera, Bat Little Brown           | 0.01% |

|      |                                          |       |
|------|------------------------------------------|-------|
| 1186 | Chiroptera, Bat Rodrigues Flying Fox     | 0.01% |
| 1187 | Chiroptera, Fox Indian Flying            | 0.01% |
| 1188 | Chondrichthyes, Ray Large                | 0.01% |
| 1189 | Chondrichthyes, Shark Bonnethead         | 0.01% |
| 1190 | Chondrichthyes, Shark Bull               | 0.01% |
| 1191 | Chondrichthyes, Shark Cat                | 0.01% |
| 1192 | Chondrichthyes, Shark Horn               | 0.01% |
| 1193 | Chondrichthyes, Shark Mako Shortfin      | 0.01% |
| 1194 | Chondrichthyes, Shark Pelagic            | 0.01% |
| 1195 | Chondrichthyes, Shark Reef Species       | 0.01% |
| 1196 | Chondrichthyes, Shark Whitetip Reef      | 0.01% |
| 1197 | Chondrichthyes, Stingray Southern        | 0.01% |
| 1198 | Crocodylia, Caiman Black                 | 0.01% |
| 1199 | Crocodylia, Crocodile South American     | 0.01% |
| 1200 | Crocodylia, Crocodile West African Dwarf | 0.01% |
| 1201 | Insectivora, Hedgehog Lesser Tenrec      | 0.01% |
| 1202 | Insectivora, Mole Star Nose              | 0.01% |
| 1203 | Invertebrate, Bear Water                 | 0.01% |
| 1204 | Invertebrate, Beetle Goliath             | 0.01% |
| 1205 | Invertebrate, Beetle Hercules            | 0.01% |
| 1206 | Invertebrate, Beetle Rhinoceros          | 0.01% |
| 1207 | Invertebrate, Butterfly Birdwing         | 0.01% |
| 1208 | Invertebrate, Butterfly Swallowtail      | 0.01% |
| 1209 | Invertebrate, Conch                      | 0.01% |
| 1210 | Invertebrate, Coral Endangered           | 0.01% |
| 1211 | Invertebrate, Coral Pillar               | 0.01% |
| 1212 | Invertebrate, Coral Staghorn             | 0.01% |
| 1213 | Invertebrate, Crab King                  | 0.01% |
| 1214 | Invertebrate, Insect Metalmark           | 0.01% |
| 1215 | Invertebrate, Jellyfish Moon             | 0.01% |
| 1216 | Invertebrate, Lobster Spiny              | 0.01% |
| 1217 | Invertebrate, Millipedes Giant African   | 0.01% |
| 1218 | Invertebrate, Moth Barberry Carpet       | 0.01% |
| 1219 | Invertebrate, Moth Luna                  | 0.01% |
| 1220 | Invertebrate, Scorpion Emperor           | 0.01% |
| 1221 | Invertebrate, Spider Widow               | 0.01% |
| 1222 | Invertebrate, Starfish Basket            | 0.01% |
| 1223 | Invertebrate, Tarantula Bird Eating      | 0.01% |
| 1224 | Invertebrate, Tarantula Chilean          | 0.01% |
| 1225 | Mammalia, Edentates                      | 0.01% |
| 1226 | Marsupialia, Marsupial Carnivorous       | 0.01% |
| 1227 | Marsupialia, Marsupial Endangered        | 0.01% |
| 1228 | Marsupialia, Possum Leadbeater's         | 0.01% |
| 1229 | Marsupialia, Tiger Quoll                 | 0.01% |
| 1230 | Marsupialia, Wallaby Parma               | 0.01% |
| 1231 | Marsupialia, Wallaby Yellow-Footed Rock  | 0.01% |
| 1232 | Perissodactyla, Equid Wild               | 0.01% |
| 1233 | Perissodactyla, Horse Domestic           | 0.01% |

|      |                                        |       |
|------|----------------------------------------|-------|
| 1234 | Perissodactyla, Onager                 | 0.01% |
| 1235 | Pisces, Bass Giant Sea                 | 0.01% |
| 1236 | Pisces, Bass Striped                   | 0.01% |
| 1237 | Pisces, Cichlid Lake Tanganyika        | 0.01% |
| 1238 | Pisces, Drum Black                     | 0.01% |
| 1239 | Pisces, Fish African Fresh Water       | 0.01% |
| 1240 | Pisces, Fish Aquacultured              | 0.01% |
| 1241 | Pisces, Fish Arctic                    | 0.01% |
| 1242 | Pisces, Fish Asian                     | 0.01% |
| 1243 | Pisces, Fish Australian Lungfish       | 0.01% |
| 1244 | Pisces, Fish Blue Tang                 | 0.01% |
| 1245 | Pisces, Fish Cartilaginous             | 0.01% |
| 1246 | Pisces, Fish Catfish                   | 0.01% |
| 1247 | Pisces, Fish Cod                       | 0.01% |
| 1248 | Pisces, Fish Eel Garden                | 0.01% |
| 1249 | Pisces, Fish Estuarine                 | 0.01% |
| 1250 | Pisces, Fish Indo-Pacific Reef         | 0.01% |
| 1251 | Pisces, Fish Jack                      | 0.01% |
| 1252 | Pisces, Fish North American Freshwater | 0.01% |
| 1253 | Pisces, Fish Open Ocean                | 0.01% |
| 1254 | Pisces, Fish Sheepshead                | 0.01% |
| 1255 | Pisces, Fish South Pacific Reef        | 0.01% |
| 1256 | Pisces, Fish Stonefish                 | 0.01% |
| 1257 | Pisces, Fish Tropical Marine           | 0.01% |
| 1258 | Pisces, Garibaldi                      | 0.01% |
| 1259 | Pisces, Lookdown                       | 0.01% |
| 1260 | Pisces, Sawfish Smalltooth             | 0.01% |
| 1261 | Primates, Langur Francois              | 0.01% |
| 1262 | Primates, Lemur Madagascar             | 0.01% |
| 1263 | Primates, Loris Slender                | 0.01% |
| 1264 | Primates, Mangabeys                    | 0.01% |
| 1265 | Primates, Marmoset Buffy-Headed        | 0.01% |
| 1266 | Primates, Marmoset Geoffrey's          | 0.01% |
| 1267 | Primates, Monkey Asian Rainforest      | 0.01% |
| 1268 | Primates, Monkey Black-Handed Spider   | 0.01% |
| 1269 | Primates, Monkey Colobus Red           | 0.01% |
| 1270 | Primates, Monkey Endangered            | 0.01% |
| 1271 | Primates, Monkey Gray Langur           | 0.01% |
| 1272 | Primates, Monkey Patas                 | 0.01% |
| 1273 | Primates, Monkey Threatened            | 0.01% |
| 1274 | Primates, Monkey Vervet                | 0.01% |
| 1275 | Primates, Monkey White-Faced Saki      | 0.01% |
| 1276 | Primates, Primate Small African        | 0.01% |
| 1277 | Primates, Prosimians                   | 0.01% |
| 1278 | Primates, Rescued                      | 0.01% |
| 1279 | Primates, Tamarin Endangered           | 0.01% |
| 1280 | Primates, Tamarin Lion                 | 0.01% |
| 1281 | Reptilia, Reptile Asian                | 0.01% |

|      |                                                   |       |
|------|---------------------------------------------------|-------|
| 1282 | Reptilia, Reptile Large                           | 0.01% |
| 1283 | Rodentia, Beaver North American                   | 0.01% |
| 1284 | Rodentia, Groundhog                               | 0.01% |
| 1285 | Rodentia, Mice                                    | 0.01% |
| 1286 | Rodentia, Mouse Perdido Key Beach                 | 0.01% |
| 1287 | Rodentia, Porcupine South America                 | 0.01% |
| 1288 | Rodentia, Rat Gambian Pouched                     | 0.01% |
| 1289 | Rodentia, Squirrel Flying                         | 0.01% |
| 1290 | Sirenia, Manatee West Indian                      | 0.01% |
| 1291 | Squamata, Boa Madagascar Tree                     | 0.01% |
| 1292 | Squamata, Boa Round Island                        | 0.01% |
| 1293 | Squamata, Chameleon Parson's                      | 0.01% |
| 1294 | Squamata, Cobra Red Spitting                      | 0.01% |
| 1295 | Squamata, Gecko Henckel Leaf Tailed               | 0.01% |
| 1296 | Squamata, Iguana Jamaican                         | 0.01% |
| 1297 | Squamata, Lizard Arboreal Alligator               | 0.01% |
| 1298 | Squamata, Lizard Chinese Water Dragon             | 0.01% |
| 1299 | Squamata, Lizard Crocodile                        | 0.01% |
| 1300 | Squamata, Lizard Goanna                           | 0.01% |
| 1301 | Squamata, Lizard Mexican Beaded                   | 0.01% |
| 1302 | Squamata, Lizard South American                   | 0.01% |
| 1303 | Squamata, Lizard Spiny-Tailed                     | 0.01% |
| 1304 | Squamata, Lizard Venomous                         | 0.01% |
| 1305 | Squamata, Monitor Asian Water                     | 0.01% |
| 1306 | Squamata, Monitor Black Tree                      | 0.01% |
| 1307 | Squamata, Monitor Blue Tree                       | 0.01% |
| 1308 | Squamata, Python Boelon's                         | 0.01% |
| 1309 | Squamata, Python Indian Rock                      | 0.01% |
| 1310 | Squamata, Python Woma                             | 0.01% |
| 1311 | Squamata, Skink Solomon Island                    | 0.01% |
| 1312 | Squamata, Snake American                          | 0.01% |
| 1313 | Squamata, Snake Black Rat                         | 0.01% |
| 1314 | Squamata, Snake Brown Tree                        | 0.01% |
| 1315 | Squamata, Snake Bull                              | 0.01% |
| 1316 | Squamata, Snake Cat-Eyed                          | 0.01% |
| 1317 | Squamata, Snake Colubrid                          | 0.01% |
| 1318 | Squamata, Snake Corn                              | 0.01% |
| 1319 | Squamata, Snake Diamondback Rattlesnake           | 0.01% |
| 1320 | Squamata, Snake Fox                               | 0.01% |
| 1321 | Squamata, Snake Native Venomous                   | 0.01% |
| 1322 | Squamata, Snake North American Venomous           | 0.01% |
| 1323 | Squamata, Snake Pine                              | 0.01% |
| 1324 | Squamata, Snake Pygmy Rattlesnake                 | 0.01% |
| 1325 | Squamata, Snake Santa Catalina Island Rattlesnake | 0.01% |
| 1326 | Squamata, Snake Small Non-Venomous                | 0.01% |
| 1327 | Squamata, Snake South American                    | 0.01% |
| 1328 | Squamata, Snake Viper Rhinoceros                  | 0.01% |
| 1329 | Squamata, Snake Viper Tree                        | 0.01% |

|      |                                                      |       |
|------|------------------------------------------------------|-------|
| 1330 | Xenarthra, Armadillo Pink Fairy                      | 0.01% |
| 1331 | Xenarthra, Sloth Hoffmann's Two-Toed                 | 0.01% |
| 1332 | Xenarthra, Sloth Linnaeus's Two-Toed                 | 0.01% |
| 1333 | Amphibia, Amphibian Desert                           | 0.00% |
| 1334 | Amphibia, Amphibian European                         | 0.00% |
| 1335 | Amphibia, Amphibian Savanna                          | 0.00% |
| 1336 | Amphibia, Amphibian Terrestrial                      | 0.00% |
| 1337 | Amphibia, Amphibian Tundra                           | 0.00% |
| 1338 | Amphibia, Bullfrog African                           | 0.00% |
| 1339 | Amphibia, Bullfrog American                          | 0.00% |
| 1340 | Amphibia, Frog African                               | 0.00% |
| 1341 | Amphibia, Frog Brazilian Horned                      | 0.00% |
| 1342 | Amphibia, Frog Budgett's                             | 0.00% |
| 1343 | Amphibia, Frog California Red Legged                 | 0.00% |
| 1344 | Amphibia, Frog Clawed                                | 0.00% |
| 1345 | Amphibia, Frog Dusky Gopher                          | 0.00% |
| 1346 | Amphibia, Frog Gliding Tree                          | 0.00% |
| 1347 | Amphibia, Frog Horned Species                        | 0.00% |
| 1348 | Amphibia, Frog Leopard                               | 0.00% |
| 1349 | Amphibia, Frog Mossy                                 | 0.00% |
| 1350 | Amphibia, Frog Mountain Chicken                      | 0.00% |
| 1351 | Amphibia, Frog Pacman                                | 0.00% |
| 1352 | Amphibia, Frog Polka-Dot Tree                        | 0.00% |
| 1353 | Amphibia, Frog Pond                                  | 0.00% |
| 1354 | Amphibia, Frog Red Eyed Tree                         | 0.00% |
| 1355 | Amphibia, Frog Scrotum                               | 0.00% |
| 1356 | Amphibia, Frog Small                                 | 0.00% |
| 1357 | Amphibia, Frog Solomon Island Leaf                   | 0.00% |
| 1358 | Amphibia, Frog Stephen Island                        | 0.00% |
| 1359 | Amphibia, Frog Water                                 | 0.00% |
| 1360 | Amphibia, Frog Waxy Monkey Tree                      | 0.00% |
| 1361 | Amphibia, Hellbender Ozark                           | 0.00% |
| 1362 | Amphibia, Mantella Green                             | 0.00% |
| 1363 | Amphibia, Newt Black Spotted                         | 0.00% |
| 1364 | Amphibia, Newt California                            | 0.00% |
| 1365 | Amphibia, Newt Sierra                                | 0.00% |
| 1366 | Amphibia, Salamander Ambystomatid                    | 0.00% |
| 1367 | Amphibia, Salamander Aquatic Siren Rio Grande Lesser | 0.00% |
| 1368 | Amphibia, Salamander Blind Cave                      | 0.00% |
| 1369 | Amphibia, Salamander Chinese                         | 0.00% |
| 1370 | Amphibia, Salamander Cryptobranchid                  | 0.00% |
| 1371 | Amphibia, Salamander Four-Toed                       | 0.00% |
| 1372 | Amphibia, Salamander Frosted Flatwoods               | 0.00% |
| 1373 | Amphibia, Salamander Lungless                        | 0.00% |
| 1374 | Amphibia, Salamander Mole                            | 0.00% |
| 1375 | Amphibia, Salamander Mudpuppy                        | 0.00% |
| 1376 | Amphibia, Salamander North American                  | 0.00% |
| 1377 | Amphibia, Salamander Plethodon                       | 0.00% |

|      |                                              |       |
|------|----------------------------------------------|-------|
| 1378 | Amphibia, Salamander Texas Blind             | 0.00% |
| 1379 | Amphibia, Toad Boreal                        | 0.00% |
| 1380 | Amphibia, Toad Colorado River                | 0.00% |
| 1381 | Amphibia, Toad Firebelly                     | 0.00% |
| 1382 | Amphibia, Toad Marine                        | 0.00% |
| 1383 | Amphibia, Toad North American                | 0.00% |
| 1384 | Amphibia, Toad Oyster                        | 0.00% |
| 1385 | Amphibia, Toad Panamanian Golden             | 0.00% |
| 1386 | Amphibia, Toad River                         | 0.00% |
| 1387 | Amphibia, Toad Secret Headed Agama           | 0.00% |
| 1388 | Amphibia, Toad Spadefoot                     | 0.00% |
| 1389 | Amphibia, Toad Spray                         | 0.00% |
| 1390 | Amphibia, Toad Suriname                      | 0.00% |
| 1391 | Amphibia, Toad Walking                       | 0.00% |
| 1392 | Artiodactyla, Antelope Royal                 | 0.00% |
| 1393 | Artiodactyla, Antelope Sable Giant           | 0.00% |
| 1394 | Artiodactyla, Babirusa North Sulawesi        | 0.00% |
| 1395 | Artiodactyla, Bison Wood                     | 0.00% |
| 1396 | Artiodactyla, Caribou Woodland               | 0.00% |
| 1397 | Artiodactyla, Cattle American Heritage Breed | 0.00% |
| 1398 | Artiodactyla, Cattle Ankole-Watusi           | 0.00% |
| 1399 | Artiodactyla, Cattle Banteng                 | 0.00% |
| 1400 | Artiodactyla, Cattle Scottish Highland       | 0.00% |
| 1401 | Artiodactyla, Chevrotain Water               | 0.00% |
| 1402 | Artiodactyla, Cow Asian                      | 0.00% |
| 1403 | Artiodactyla, Cow Dairy                      | 0.00% |
| 1404 | Artiodactyla, Cow Domestic                   | 0.00% |
| 1405 | Artiodactyla, Deer Axis                      | 0.00% |
| 1406 | Artiodactyla, Deer Barasingha                | 0.00% |
| 1407 | Artiodactyla, Deer Bawean                    | 0.00% |
| 1408 | Artiodactyla, Deer Brocket                   | 0.00% |
| 1409 | Artiodactyla, Deer Calamian                  | 0.00% |
| 1410 | Artiodactyla, Deer Cheviot's Mouse           | 0.00% |
| 1411 | Artiodactyla, Deer Chinese Water             | 0.00% |
| 1412 | Artiodactyla, Deer European                  | 0.00% |
| 1413 | Artiodactyla, Deer Key                       | 0.00% |
| 1414 | Artiodactyla, Deer Muntjac Reeves            | 0.00% |
| 1415 | Artiodactyla, Deer North American            | 0.00% |
| 1416 | Artiodactyla, Deer Pampas                    | 0.00% |
| 1417 | Artiodactyla, Deer South American            | 0.00% |
| 1418 | Artiodactyla, Deer Thorold's                 | 0.00% |
| 1419 | Artiodactyla, Deer Visayan Spotted           | 0.00% |
| 1420 | Artiodactyla, Deer White Tailed              | 0.00% |
| 1421 | Artiodactyla, Duiker Bay                     | 0.00% |
| 1422 | Proboscidea, Elephant Forest                 | 0.00% |
| 1423 | Artiodactyla, Giraffe Endangered             | 0.00% |
| 1424 | Artiodactyla, Goat American Heritage Breed   | 0.00% |
| 1425 | Artiodactyla, Goat Anglo-Nubian              | 0.00% |

|      |                                               |       |
|------|-----------------------------------------------|-------|
| 1426 | Artiodactyla, Goat Arapawa                    | 0.00% |
| 1427 | Artiodactyla, Goat Asia                       | 0.00% |
| 1428 | Artiodactyla, Goat Dwarf Nigerian             | 0.00% |
| 1429 | Artiodactyla, Goat Exotic Mountain            | 0.00% |
| 1430 | Artiodactyla, Hog Guinea                      | 0.00% |
| 1431 | Artiodactyla, Hoof Mammals                    | 0.00% |
| 1432 | Artiodactyla, Hoof Small Stock                | 0.00% |
| 1433 | Artiodactyla, Hoofstock European              | 0.00% |
| 1434 | Artiodactyla, Ibex Walia                      | 0.00% |
| 1435 | Artiodactyla, Impala Black-faced              | 0.00% |
| 1436 | Artiodactyla, Kob                             | 0.00% |
| 1437 | Artiodactyla, Kouprey                         | 0.00% |
| 1438 | Artiodactyla, Lechwe                          | 0.00% |
| 1439 | Artiodactyla, Lechwe Red                      | 0.00% |
| 1440 | Artiodactyla, Moose Alaskan                   | 0.00% |
| 1441 | Artiodactyla, Mouflon Armenian                | 0.00% |
| 1442 | Artiodactyla, Peccary White Lipped            | 0.00% |
| 1443 | Artiodactyla, Pig Asian Wild                  | 0.00% |
| 1444 | Artiodactyla, Pig Bearded                     | 0.00% |
| 1445 | Artiodactyla, Pig Exotic                      | 0.00% |
| 1446 | Artiodactyla, Pig Wild Boar                   | 0.00% |
| 1447 | Artiodactyla, Serow                           | 0.00% |
| 1448 | Artiodactyla, Sheep American Heritage Breed   | 0.00% |
| 1449 | Artiodactyla, Sheep Heritage Breed            | 0.00% |
| 1450 | Artiodactyla, Sheep Peninsular Desert Bighorn | 0.00% |
| 1451 | Artiodactyla, Sheep Rare Breed                | 0.00% |
| 1452 | Artiodactyla, Sheep Wild                      | 0.00% |
| 1453 | Artiodactyla, Small                           | 0.00% |
| 1454 | Artiodactyla, Steenbok                        | 0.00% |
| 1455 | Artiodactyla, Tahr Himalayan                  | 0.00% |
| 1456 | Artiodactyla, Takin Golden                    | 0.00% |
| 1457 | Artiodactyla, Tur W Caucasian                 | 0.00% |
| 1458 | Artiodactyla, Ungulate European               | 0.00% |
| 1459 | Aves, Albatross Amsterdam                     | 0.00% |
| 1460 | Aves, Amazon Green Cheek                      | 0.00% |
| 1461 | Aves, Anhinga                                 | 0.00% |
| 1462 | Aves, Antpitta                                | 0.00% |
| 1463 | Aves, Aracari Green                           | 0.00% |
| 1464 | Aves, Bee Eater Carmine                       | 0.00% |
| 1465 | Aves, Bee Eater White Throated                | 0.00% |
| 1466 | Aves, Bird Endemic Hawaiian                   | 0.00% |
| 1467 | Aves, Bird Endemic To The Zoo's Region        | 0.00% |
| 1468 | Aves, Bird Eurasian                           | 0.00% |
| 1469 | Aves, Bird Every Geographical Region          | 0.00% |
| 1470 | Aves, Bird Fantail Rufous                     | 0.00% |
| 1471 | Aves, Bird Fish Eating                        | 0.00% |
| 1472 | Aves, Bird For Mixed Species Exhibits         | 0.00% |
| 1473 | Aves, Bird Frigate                            | 0.00% |

|      |                                           |       |
|------|-------------------------------------------|-------|
| 1474 | Aves, Bird Fruit Eating                   | 0.00% |
| 1475 | Aves, Bird Fruit/Seed Eating              | 0.00% |
| 1476 | Aves, Bird Go Away                        | 0.00% |
| 1477 | Aves, Bird Ground                         | 0.00% |
| 1478 | Aves, Bird Hawaiian Endangered            | 0.00% |
| 1479 | Aves, Bird Hawaiian Forest                | 0.00% |
| 1480 | Aves, Bird Hummingbird Endangered         | 0.00% |
| 1481 | Aves, Bird Killdeer                       | 0.00% |
| 1482 | Aves, Bird Large African                  | 0.00% |
| 1483 | Aves, Bird Large Ground                   | 0.00% |
| 1484 | Aves, Bird Large Land                     | 0.00% |
| 1485 | Aves, Bird Large Predatory                | 0.00% |
| 1486 | Aves, Bird Little Endangered              | 0.00% |
| 1487 | Aves, Bird Madagascar                     | 0.00% |
| 1488 | Aves, Bird Mariana Islands                | 0.00% |
| 1489 | Aves, Bird Marsh                          | 0.00% |
| 1490 | Aves, Bird Medium                         | 0.00% |
| 1491 | Aves, Bird Migratory Endangered           | 0.00% |
| 1492 | Aves, Bird Native WaterBird               | 0.00% |
| 1493 | Aves, Bird Neotropical                    | 0.00% |
| 1494 | Aves, Bird New World                      | 0.00% |
| 1495 | Aves, Bird New Zealand                    | 0.00% |
| 1496 | Aves, Bird North American Prairie         | 0.00% |
| 1497 | Aves, Bird North American ShoreBird       | 0.00% |
| 1498 | Aves, Bird Of Prey Rescued                | 0.00% |
| 1499 | Aves, Bird Of Prey Small                  | 0.00% |
| 1500 | Aves, Bird Old World                      | 0.00% |
| 1501 | Aves, Bird Paradise Fly-Catcher           | 0.00% |
| 1502 | Aves, Bird Perching                       | 0.00% |
| 1503 | Aves, Bird Predatory                      | 0.00% |
| 1504 | Aves, Bird Rescued                        | 0.00% |
| 1505 | Aves, Bird Rescued Native                 | 0.00% |
| 1506 | Aves, Bird Scrub-Bird                     | 0.00% |
| 1507 | Aves, Bird Songbirds African              | 0.00% |
| 1508 | Aves, Bird Songbirds America Native       | 0.00% |
| 1509 | Aves, Bird Songbirds Indonesian           | 0.00% |
| 1510 | Aves, Bird Songbirds Local                | 0.00% |
| 1511 | Aves, Bird Songbirds Migratory            | 0.00% |
| 1512 | Aves, Bird Songbirds SE Asian             | 0.00% |
| 1513 | Aves, Bird Songbirds Small                | 0.00% |
| 1514 | Aves, Bird Songbirds Small Colorful       | 0.00% |
| 1515 | Aves, Bird Songbirds Small South American | 0.00% |
| 1516 | Aves, Bird Songbirds Tropical             | 0.00% |
| 1517 | Aves, Bird Storks                         | 0.00% |
| 1518 | Aves, Bird Umbrella                       | 0.00% |
| 1519 | Aves, Bird Wading                         | 0.00% |
| 1520 | Aves, Bird Wading Endangered              | 0.00% |
| 1521 | Aves, Bird Wetland                        | 0.00% |

|      |                                       |       |
|------|---------------------------------------|-------|
| 1522 | Aves, Bird White-Eyes Bridled         | 0.00% |
| 1523 | Aves, Bittern American                | 0.00% |
| 1524 | Aves, Boobies                         | 0.00% |
| 1525 | Aves, Bulbul                          | 0.00% |
| 1526 | Aves, Bunting Painted                 | 0.00% |
| 1527 | Aves, Bustard Buff Crested            | 0.00% |
| 1528 | Aves, Bustard Great Indian            | 0.00% |
| 1529 | Aves, Bustard Houbara                 | 0.00% |
| 1530 | Aves, Buzzard                         | 0.00% |
| 1531 | Aves, Cacique Yellow Rumped           | 0.00% |
| 1532 | Aves, Canary                          | 0.00% |
| 1533 | Aves, Capercaillie                    | 0.00% |
| 1534 | Aves, Cara Cara                       | 0.00% |
| 1535 | Aves, Cardinal Red Crested            | 0.00% |
| 1536 | Aves, Chicken American Heritage Breed | 0.00% |
| 1537 | Aves, Chicken Prairie Lesser          | 0.00% |
| 1538 | Aves, Cockatoo Gang Gang              | 0.00% |
| 1539 | Aves, Cockatoo Indonesian             | 0.00% |
| 1540 | Aves, Cockatoo Leadbeater             | 0.00% |
| 1541 | Aves, Cockatoo Lesser Sulphur Crested | 0.00% |
| 1542 | Aves, Cockatoo Red Tail Black         | 0.00% |
| 1543 | Aves, Cockatoo Red Vented             | 0.00% |
| 1544 | Aves, Cockatoo Sulphur Crest          | 0.00% |
| 1545 | Aves, Cockatoo Umbrella               | 0.00% |
| 1546 | Aves, Conure                          | 0.00% |
| 1547 | Aves, Conure Golden                   | 0.00% |
| 1548 | Aves, Cotinga                         | 0.00% |
| 1549 | Aves, Coua Crested                    | 0.00% |
| 1550 | Aves, Crane Black Crowned             | 0.00% |
| 1551 | Aves, Crane Endangered                | 0.00% |
| 1552 | Aves, Crane Grey                      | 0.00% |
| 1553 | Aves, Crane Hooded                    | 0.00% |
| 1554 | Aves, Crane North American            | 0.00% |
| 1555 | Aves, Crane Threatened                | 0.00% |
| 1556 | Aves, Cuckoos Ground                  | 0.00% |
| 1557 | Aves, Curassow Blue-Faced             | 0.00% |
| 1558 | Aves, Curassow Great                  | 0.00% |
| 1559 | Aves, Dikkop                          | 0.00% |
| 1560 | Aves, Dikkop Spotted                  | 0.00% |
| 1561 | Aves, Dove Bleeding Heart Mindanao    | 0.00% |
| 1562 | Aves, Dove Bleeding Heart Sulu        | 0.00% |
| 1563 | Aves, Dove Blue-Headed Ground         | 0.00% |
| 1564 | Aves, Dove Diamond                    | 0.00% |
| 1565 | Aves, Dove Endangered                 | 0.00% |
| 1566 | Aves, Dove Flame                      | 0.00% |
| 1567 | Aves, Dove Pink-Necked Fruit          | 0.00% |
| 1568 | Aves, Duck American Heritage Breed    | 0.00% |
| 1569 | Aves, Duck Exotic                     | 0.00% |

|      |                                |       |
|------|--------------------------------|-------|
| 1570 | Aves, Duck Freshwater          | 0.00% |
| 1571 | Aves, Duck Laysan              | 0.00% |
| 1572 | Aves, Duck Long-Tailed         | 0.00% |
| 1573 | Aves, Duck Masked              | 0.00% |
| 1574 | Aves, Duck Muscovy             | 0.00% |
| 1575 | Aves, Duck North American      | 0.00% |
| 1576 | Aves, Duck Pink-Eared          | 0.00% |
| 1577 | Aves, Duck Redhead             | 0.00% |
| 1578 | Aves, Duck South American      | 0.00% |
| 1579 | Aves, Duck Spotted Whistling   | 0.00% |
| 1580 | Aves, Duck Stiff-Tail          | 0.00% |
| 1581 | Aves, Duck Torrent             | 0.00% |
| 1582 | Aves, Duck Whistling           | 0.00% |
| 1583 | Aves, Eagle African            | 0.00% |
| 1584 | Aves, Eagle African Crowned    | 0.00% |
| 1585 | Aves, Eagle African Fishing    | 0.00% |
| 1586 | Aves, Eagle American           | 0.00% |
| 1587 | Aves, Eagle Asian              | 0.00% |
| 1588 | Aves, Eagle Bangalore          | 0.00% |
| 1589 | Aves, Eagle Crowned            | 0.00% |
| 1590 | Aves, Eagle Endangered         | 0.00% |
| 1591 | Aves, Eagle Large              | 0.00% |
| 1592 | Aves, Eagle Native             | 0.00% |
| 1593 | Aves, Eagle Non-Native         | 0.00% |
| 1594 | Aves, Eagle North American     | 0.00% |
| 1595 | Aves, Eagle Pallas's Sea       | 0.00% |
| 1596 | Aves, Eagle Rescued Bald       | 0.00% |
| 1597 | Aves, Eagle Sea                | 0.00% |
| 1598 | Aves, Eagle South American     | 0.00% |
| 1599 | Aves, Eagle Spanish Imperial   | 0.00% |
| 1600 | Aves, Eider                    | 0.00% |
| 1601 | Aves, Falcon Aplomodo          | 0.00% |
| 1602 | Aves, Finch Diamond Firetail   | 0.00% |
| 1603 | Aves, Finch Estrildid          | 0.00% |
| 1604 | Aves, Finch Galapagos          | 0.00% |
| 1605 | Aves, Finfoot Masked           | 0.00% |
| 1606 | Aves, Firecrown Juan Fernandez | 0.00% |
| 1607 | Aves, Flowerpecker Cebu        | 0.00% |
| 1608 | Aves, Goose Bar-Headed         | 0.00% |
| 1609 | Aves, Goose Brant              | 0.00% |
| 1610 | Aves, Goose Canada             | 0.00% |
| 1611 | Aves, Goose Endangered         | 0.00% |
| 1612 | Aves, Goose Magpie             | 0.00% |
| 1613 | Aves, Grebe                    | 0.00% |
| 1614 | Aves, Grouse                   | 0.00% |
| 1615 | Aves, Grouse Endangered        | 0.00% |
| 1616 | Aves, Grouse Prairie           | 0.00% |
| 1617 | Aves, Grouse Sage Gunnison     | 0.00% |

|      |                                        |       |
|------|----------------------------------------|-------|
| 1618 | Aves, Guan                             | 0.00% |
| 1619 | Aves, Guineafowl Helmeted              | 0.00% |
| 1620 | Aves, Guineafowl Vulturine             | 0.00% |
| 1621 | Aves, Gull                             | 0.00% |
| 1622 | Aves, Gull Kelp                        | 0.00% |
| 1623 | Aves, Heron Black Crowned Night        | 0.00% |
| 1624 | Aves, Heron Green                      | 0.00% |
| 1625 | Aves, Honeyeater                       | 0.00% |
| 1626 | Aves, Hoopoe                           | 0.00% |
| 1627 | Aves, Hoopoe Wood                      | 0.00% |
| 1628 | Aves, Hornbill Abyssinian Ground       | 0.00% |
| 1629 | Aves, Hornbill Aerial                  | 0.00% |
| 1630 | Aves, Hornbill Black-and-White-Casqued | 0.00% |
| 1631 | Aves, Hornbill Giant                   | 0.00% |
| 1632 | Aves, Hornbill Malayan Wreath-Billed   | 0.00% |
| 1633 | Aves, Hornbill Northern Ground         | 0.00% |
| 1634 | Aves, Hornbill Rainforest              | 0.00% |
| 1635 | Aves, Hornbill Small Tockus            | 0.00% |
| 1636 | Aves, Hornbill Wreathed                | 0.00% |
| 1637 | Aves, Ibis African Sacred              | 0.00% |
| 1638 | Aves, Ibis Dwarf Olive                 | 0.00% |
| 1639 | Aves, Ibis Hadada                      | 0.00% |
| 1640 | Aves, Ibis Madagascar Crested          | 0.00% |
| 1641 | Aves, Ibis Puna                        | 0.00% |
| 1642 | Aves, Ibis Sacred                      | 0.00% |
| 1643 | Aves, Ibis South American              | 0.00% |
| 1644 | Aves, I'Iwi                            | 0.00% |
| 1645 | Aves, Jays Blue                        | 0.00% |
| 1646 | Aves, Jays Collies                     | 0.00% |
| 1647 | Aves, Jays Magpie                      | 0.00% |
| 1648 | Aves, Jays Plush Crested               | 0.00% |
| 1649 | Aves, Kestrel American                 | 0.00% |
| 1650 | Aves, Kestrel Mauritius                | 0.00% |
| 1651 | Aves, Kingfisher African Pygmy         | 0.00% |
| 1652 | Aves, Kittiwake                        | 0.00% |
| 1653 | Aves, Knot Red                         | 0.00% |
| 1654 | Aves, Lapwing Masked                   | 0.00% |
| 1655 | Aves, Lorikeet Coconut                 | 0.00% |
| 1656 | Aves, Lorikeet Forstens                | 0.00% |
| 1657 | Aves, Lorikeet Indonesian              | 0.00% |
| 1658 | Aves, Macaw Blue and Yellow            | 0.00% |
| 1659 | Aves, Macaw Military                   | 0.00% |
| 1660 | Aves, Macaw Red-and-Green              | 0.00% |
| 1661 | Aves, Magpie Yellow Billed             | 0.00% |
| 1662 | Aves, Manakin                          | 0.00% |
| 1663 | Aves, Manakin Araripe                  | 0.00% |
| 1664 | Aves, Merganser                        | 0.00% |
| 1665 | Aves, Merganser Large                  | 0.00% |

|      |                                            |       |
|------|--------------------------------------------|-------|
| 1666 | Aves, Moorhen                              | 0.00% |
| 1667 | Aves, Murre Common                         | 0.00% |
| 1668 | Aves, Nightjar                             | 0.00% |
| 1669 | Aves, Oriole                               | 0.00% |
| 1670 | Aves, Oriole Bahamas                       | 0.00% |
| 1671 | Aves, Oropendula Crested                   | 0.00% |
| 1672 | Aves, Owl Elf                              | 0.00% |
| 1673 | Aves, Owl Ferruginous Pygmy                | 0.00% |
| 1674 | Aves, Owl Longhorned                       | 0.00% |
| 1675 | Aves, Owl Verreaux's Eagle                 | 0.00% |
| 1676 | Aves, Parakeet Monk                        | 0.00% |
| 1677 | Aves, Parakeet Scarlet Chest               | 0.00% |
| 1678 | Aves, Parrot Blue-Crowned Hanging          | 0.00% |
| 1679 | Aves, Parrot Burrowing                     | 0.00% |
| 1680 | Aves, Parrot Fig                           | 0.00% |
| 1681 | Aves, Parrot Large                         | 0.00% |
| 1682 | Aves, Parrot New World                     | 0.00% |
| 1683 | Aves, Parrot New Zealand Ground            | 0.00% |
| 1684 | Aves, Parrot Old World                     | 0.00% |
| 1685 | Aves, Parrot Orange-Bellied                | 0.00% |
| 1686 | Aves, Parrot Quaker                        | 0.00% |
| 1687 | Aves, Parrot Rainforest                    | 0.00% |
| 1688 | Aves, Parrot Senegal                       | 0.00% |
| 1689 | Aves, Parrot St. Vincent Amazon            | 0.00% |
| 1690 | Aves, Parrot St. Vincents                  | 0.00% |
| 1691 | Aves, Parrot Threatened                    | 0.00% |
| 1692 | Aves, Parrot Tropical                      | 0.00% |
| 1693 | Aves, Parrot Yellow-Headed Amazon          | 0.00% |
| 1694 | Aves, Parrot Yellow-Naped Amazon           | 0.00% |
| 1695 | Aves, Partridge                            | 0.00% |
| 1696 | Aves, Passerine Affected By Climate Change | 0.00% |
| 1697 | Aves, Passerine Declining                  | 0.00% |
| 1698 | Aves, Passerine Neotropical                | 0.00% |
| 1699 | Aves, Passerine Social                     | 0.00% |
| 1700 | Aves, Passerine Tropical                   | 0.00% |
| 1701 | Aves, Peafowl Congo                        | 0.00% |
| 1702 | Aves, Peafowl Indian                       | 0.00% |
| 1703 | Aves, Pelican American White               | 0.00% |
| 1704 | Aves, Penguin Banded                       | 0.00% |
| 1705 | Aves, Penguin Brush Tailed                 | 0.00% |
| 1706 | Aves, Penguin Chinstrap                    | 0.00% |
| 1707 | Aves, Petrel                               | 0.00% |
| 1708 | Aves, Pheasant Asian                       | 0.00% |
| 1709 | Aves, Pheasant Currasow                    | 0.00% |
| 1710 | Aves, Pheasant Green-Naped                 | 0.00% |
| 1711 | Aves, Pheasant Silver                      | 0.00% |
| 1712 | Aves, Pheasant Vietnamese                  | 0.00% |
| 1713 | Aves, Pigeon Blue Crowned                  | 0.00% |

|      |                                   |       |
|------|-----------------------------------|-------|
| 1714 | Aves, Pigeon Crested              | 0.00% |
| 1715 | Aves, Pigeon Green-Naped Pheasant | 0.00% |
| 1716 | Aves, Pigeon Guillemot            | 0.00% |
| 1717 | Aves, Pigeon Mauritius Pink       | 0.00% |
| 1718 | Aves, Pigeon Mindoro Imperial     | 0.00% |
| 1719 | Aves, Pitohui                     | 0.00% |
| 1720 | Aves, Pitta                       | 0.00% |
| 1721 | Aves, Pitta Hooded                | 0.00% |
| 1722 | Aves, Plover Egyptian             | 0.00% |
| 1723 | Aves, Plover Mountain             | 0.00% |
| 1724 | Aves, Pochard Malagasy            | 0.00% |
| 1725 | Aves, Puffin Horned               | 0.00% |
| 1726 | Aves, Puffin Tufted               | 0.00% |
| 1727 | Aves, Quail Bobwhite              | 0.00% |
| 1728 | Aves, Quail Bobwhite Masked       | 0.00% |
| 1729 | Aves, Quail Himalayan             | 0.00% |
| 1730 | Aves, Rail                        | 0.00% |
| 1731 | Aves, Raptor Firehawk Australian  | 0.00% |
| 1732 | Aves, Ratite Cassowary Dwarf      | 0.00% |
| 1733 | Aves, Ratite Cassowary Northern   | 0.00% |
| 1734 | Aves, Rhea Greater                | 0.00% |
| 1735 | Aves, Rhea Lesser                 | 0.00% |
| 1736 | Aves, Robin Pekin                 | 0.00% |
| 1737 | Aves, Sandpiper                   | 0.00% |
| 1738 | Aves, Sandpiper Spoon Billed      | 0.00% |
| 1739 | Aves, Shrike Eastern Loggerhead   | 0.00% |
| 1740 | Aves, Skimmer                     | 0.00% |
| 1741 | Aves, Smew                        | 0.00% |
| 1742 | Aves, Starling Superb             | 0.00% |
| 1743 | Aves, Stork Black                 | 0.00% |
| 1744 | Aves, Stork Lesser Adjutant       | 0.00% |
| 1745 | Aves, Stork Yellow-Billed         | 0.00% |
| 1746 | Aves, Swan Whooper                | 0.00% |
| 1747 | Aves, Takahe                      | 0.00% |
| 1748 | Aves, Tanager Neotropical         | 0.00% |
| 1749 | Aves, Teal                        | 0.00% |
| 1750 | Aves, Teal Baikal                 | 0.00% |
| 1751 | Aves, Teal Hottentot              | 0.00% |
| 1752 | Aves, Teal Laysan                 | 0.00% |
| 1753 | Aves, Teal Malagasy               | 0.00% |
| 1754 | Aves, Teal Marbled                | 0.00% |
| 1755 | Aves, Tern Chinese Crested        | 0.00% |
| 1756 | Aves, Tern Least                  | 0.00% |
| 1757 | Aves, Thrush Chesnut Backed       | 0.00% |
| 1758 | Aves, Thrush Laughing             | 0.00% |
| 1759 | Aves, Thrush Shama                | 0.00% |
| 1760 | Aves, Tody Cuban or Jamaican      | 0.00% |
| 1761 | Aves, Toucan Large                | 0.00% |

|      |                                            |       |
|------|--------------------------------------------|-------|
| 1762 | Aves, Toucan Mountain                      | 0.00% |
| 1763 | Aves, Toucan Mountain Plate-Pilled         | 0.00% |
| 1764 | Aves, Toucanets                            | 0.00% |
| 1765 | Aves, Trogon                               | 0.00% |
| 1766 | Aves, Turaco Bannerman's                   | 0.00% |
| 1767 | Aves, Turaco Endangered                    | 0.00% |
| 1768 | Aves, Turaco Fischer's                     | 0.00% |
| 1769 | Aves, Turaco Green                         | 0.00% |
| 1770 | Aves, Turaco Red-Crested                   | 0.00% |
| 1771 | Aves, Turaco White Cheek                   | 0.00% |
| 1772 | Aves, Vulture Black                        | 0.00% |
| 1773 | Aves, Vulture Black American               | 0.00% |
| 1774 | Aves, Vulture Cape                         | 0.00% |
| 1775 | Aves, Vulture Indian                       | 0.00% |
| 1776 | Aves, Waterfowl African                    | 0.00% |
| 1777 | Aves, Waterfowl Endangered                 | 0.00% |
| 1778 | Aves, Waterfowl Eurasian                   | 0.00% |
| 1779 | Aves, Weaver Bishop                        | 0.00% |
| 1780 | Aves, Weaver White Headed Buffalo          | 0.00% |
| 1781 | Carnivora, Canid Asian                     | 0.00% |
| 1782 | Carnivora, Canid North American            | 0.00% |
| 1783 | Carnivora, Canid South American            | 0.00% |
| 1784 | Carnivora, Cat Arabian Sand                | 0.00% |
| 1785 | Carnivora, Cat Big American                | 0.00% |
| 1786 | Carnivora, Cat Big Endangered              | 0.00% |
| 1787 | Carnivora, Cat Big North American          | 0.00% |
| 1788 | Carnivora, Cat European Wild               | 0.00% |
| 1789 | Carnivora, Cat Exotic                      | 0.00% |
| 1790 | Carnivora, Cat Golden                      | 0.00% |
| 1791 | Carnivora, Cat Large African               | 0.00% |
| 1792 | Carnivora, Cat Large Asian                 | 0.00% |
| 1793 | Carnivora, Cat Large Endangered            | 0.00% |
| 1794 | Carnivora, Cat Lynx                        | 0.00% |
| 1795 | Carnivora, Cat Ocelot                      | 0.00% |
| 1796 | Carnivora, Cat Rainforest                  | 0.00% |
| 1797 | Carnivora, Cat Rusty-Spotted               | 0.00% |
| 1798 | Carnivora, Cat Savannah                    | 0.00% |
| 1799 | Carnivora, Cat Scottish Wild               | 0.00% |
| 1800 | Carnivora, Cat Small Exotic                | 0.00% |
| 1801 | Carnivora, Cat Small Unknown By The Public | 0.00% |
| 1802 | Carnivora, Cat Tundra                      | 0.00% |
| 1803 | Carnivora, Cat Wildcat                     | 0.00% |
| 1804 | Carnivora, Cheetah Asiatic                 | 0.00% |
| 1805 | Carnivora, Dog New Guinea Singing          | 0.00% |
| 1806 | Carnivora, Dog Raccoon                     | 0.00% |
| 1807 | Carnivora, Fox Kit                         | 0.00% |
| 1808 | Carnivora, Large                           | 0.00% |
| 1809 | Carnivora, Leopard Javan                   | 0.00% |

|      |                                          |       |
|------|------------------------------------------|-------|
| 1810 | Carnivora, Lion W African                | 0.00% |
| 1811 | Carnivora, Marbled Polecat               | 0.00% |
| 1812 | Carnivora, Marten                        | 0.00% |
| 1813 | Carnivora, Marten American               | 0.00% |
| 1814 | Carnivora, Mongoose Dwarf                | 0.00% |
| 1815 | Carnivora, Mustelidae North American     | 0.00% |
| 1816 | Carnivora, Procyonids                    | 0.00% |
| 1817 | Carnivora, Seal Antarctic Fur            | 0.00% |
| 1818 | Carnivora, Seal Arctic                   | 0.00% |
| 1819 | Carnivora, Seal Endangered               | 0.00% |
| 1820 | Carnivora, Seal Guadalupe Fur            | 0.00% |
| 1821 | Carnivora, Seal Harp                     | 0.00% |
| 1822 | Carnivora, Seal Leopard                  | 0.00% |
| 1823 | Carnivora, Skunk African polecat         | 0.00% |
| 1824 | Carnivora, Tiger Endangered              | 0.00% |
| 1825 | Carnivora, Tiger Indochinese             | 0.00% |
| 1826 | Carnivora, Tiger South China             | 0.00% |
| 1827 | Carnivora, Weasel                        | 0.00% |
| 1828 | Carnivora, Weasel North American         | 0.00% |
| 1829 | Carnivora, Wolf Endangered               | 0.00% |
| 1830 | Cetacea, Cetacean Rescued Rehab          | 0.00% |
| 1831 | Cetacea, Dolphin Hector's                | 0.00% |
| 1832 | Cetacea, Dolphin Humpback                | 0.00% |
| 1833 | Cetacea, Dolphin Indo-Pacific Bottlenose | 0.00% |
| 1834 | Cetacea, Dolphin Irrawaddy               | 0.00% |
| 1835 | Cetacea, Porpoise Harbor                 | 0.00% |
| 1836 | Cetacea, Whale Baleen                    | 0.00% |
| 1837 | Cetacea, Whale Gray                      | 0.00% |
| 1838 | Cetacea, Whale Pilot                     | 0.00% |
| 1839 | Cetacea, Whale Right                     | 0.00% |
| 1840 | Cetacea, Whale Small                     | 0.00% |
| 1841 | Chelonia, Chelonian Endangered           | 0.00% |
| 1842 | Chelonia, Chelonian Large                | 0.00% |
| 1843 | Chelonia, Chelonian Non-Native           | 0.00% |
| 1844 | Chelonia, Chelonian Sulawesi Endemic     | 0.00% |
| 1845 | Chelonia, Terrapin Painted               | 0.00% |
| 1846 | Chelonia, Tortoise Aldabra Giant         | 0.00% |
| 1847 | Chelonia, Tortoise America               | 0.00% |
| 1848 | Chelonia, Tortoise Angulate              | 0.00% |
| 1849 | Chelonia, Tortoise Burmese Star          | 0.00% |
| 1850 | Chelonia, Tortoise Forsten's             | 0.00% |
| 1851 | Chelonia, Tortoise Homopus               | 0.00% |
| 1852 | Chelonia, Tortoise Northern Spider       | 0.00% |
| 1853 | Chelonia, Tortoise Pinta Island          | 0.00% |
| 1854 | Chelonia, Tortoise Psammobates           | 0.00% |
| 1855 | Chelonia, Tortoise Spur-Thighed          | 0.00% |
| 1856 | Chelonia, Turtle Amazon River            | 0.00% |
| 1857 | Chelonia, Turtle America                 | 0.00% |

|      |                                                   |       |
|------|---------------------------------------------------|-------|
| 1858 | Chelonia, Turtle Asian Freshwater Box             | 0.00% |
| 1859 | Chelonia, Turtle Asian River                      | 0.00% |
| 1860 | Chelonia, Turtle Asian Softshell                  | 0.00% |
| 1861 | Chelonia, Turtle Bourret's Box                    | 0.00% |
| 1862 | Chelonia, Turtle Central American River           | 0.00% |
| 1863 | Chelonia, Turtle Chinese Three-Striped Box        | 0.00% |
| 1864 | Chelonia, Turtle Common Box                       | 0.00% |
| 1865 | Chelonia, Turtle Common Snapping                  | 0.00% |
| 1866 | Chelonia, Turtle Desert                           | 0.00% |
| 1867 | Chelonia, Turtle Eastern Box                      | 0.00% |
| 1868 | Chelonia, Turtle Endangered Soft-Shelled          | 0.00% |
| 1869 | Chelonia, Turtle Four-Eyed                        | 0.00% |
| 1870 | Chelonia, Turtle Giant Asian Softshell            | 0.00% |
| 1871 | Chelonia, Turtle Giant Softshelled                | 0.00% |
| 1872 | Chelonia, Turtle Hawksbill Sea                    | 0.00% |
| 1873 | Chelonia, Turtle Indochinese Box                  | 0.00% |
| 1874 | Chelonia, Turtle Lake                             | 0.00% |
| 1875 | Chelonia, Turtle Land                             | 0.00% |
| 1876 | Chelonia, Turtle Large                            | 0.00% |
| 1877 | Chelonia, Turtle Large River                      | 0.00% |
| 1878 | Chelonia, Turtle Local Snapping                   | 0.00% |
| 1879 | Chelonia, Turtle Malaysian Giant                  | 0.00% |
| 1880 | Chelonia, Turtle Mccord's Box                     | 0.00% |
| 1881 | Chelonia, Turtle Ornate Box                       | 0.00% |
| 1882 | Chelonia, Turtle Painted                          | 0.00% |
| 1883 | Chelonia, Turtle Pan's Box                        | 0.00% |
| 1884 | Chelonia, Turtle Podocnemis                       | 0.00% |
| 1885 | Chelonia, Turtle Red River Giant Softshell        | 0.00% |
| 1886 | Chelonia, Turtle Rehabbed                         | 0.00% |
| 1887 | Chelonia, Turtle Rescued                          | 0.00% |
| 1888 | Chelonia, Turtle Southern Vietnamese Box          | 0.00% |
| 1889 | Chelonia, Turtle Spiny                            | 0.00% |
| 1890 | Chelonia, Turtle Sulawesi Forest                  | 0.00% |
| 1891 | Chelonia, Turtle Vietnamese Pond                  | 0.00% |
| 1892 | Chelonia, Turtle Yellow-Bellied Slider            | 0.00% |
| 1893 | Chiroptera, Bat Australian                        | 0.00% |
| 1894 | Chiroptera, Bat Canyon                            | 0.00% |
| 1895 | Chiroptera, Bat Egyptian Fruit                    | 0.00% |
| 1896 | Chiroptera, Bat Fox Malayan Flying                | 0.00% |
| 1897 | Chiroptera, Bat Hammer Head                       | 0.00% |
| 1898 | Chiroptera, Bat Hawaiian Hoary                    | 0.00% |
| 1899 | Chiroptera, Bat Lesser Known                      | 0.00% |
| 1900 | Chiroptera, Bat Llaner Coquipacific Sheath Tailed | 0.00% |
| 1901 | Chiroptera, Bat Long Tongued                      | 0.00% |
| 1902 | Chiroptera, Bat Mexican Long Nose                 | 0.00% |
| 1903 | Chiroptera, Bat North American Endangered         | 0.00% |
| 1904 | Chiroptera, Bat Rafinesque's big eared            | 0.00% |
| 1905 | Chiroptera, Microbat Leaf Nose                    | 0.00% |

|      |                                                    |       |
|------|----------------------------------------------------|-------|
| 1906 | Chondrichthyes, Guitarfish Black Chin              | 0.00% |
| 1907 | Chondrichthyes, Ray Black Blotch                   | 0.00% |
| 1908 | Chondrichthyes, Shark Benthic                      | 0.00% |
| 1909 | Chondrichthyes, Shark Blue                         | 0.00% |
| 1910 | Chondrichthyes, Shark Bottom Dwelling              | 0.00% |
| 1911 | Chondrichthyes, Shark Brown                        | 0.00% |
| 1912 | Chondrichthyes, Shark Carcharias                   | 0.00% |
| 1913 | Chondrichthyes, Shark Carpet                       | 0.00% |
| 1914 | Chondrichthyes, Shark Chain Dogfish                | 0.00% |
| 1915 | Chondrichthyes, Shark Cookiecutter                 | 0.00% |
| 1916 | Chondrichthyes, Shark Epaulette                    | 0.00% |
| 1917 | Chondrichthyes, Shark Galapagos                    | 0.00% |
| 1918 | Chondrichthyes, Shark Goblin                       | 0.00% |
| 1919 | Chondrichthyes, Shark Great Hammerhead             | 0.00% |
| 1920 | Chondrichthyes, Shark Iridescent                   | 0.00% |
| 1921 | Chondrichthyes, Shark Lamnid                       | 0.00% |
| 1922 | Chondrichthyes, Shark Leopard                      | 0.00% |
| 1923 | Chondrichthyes, Shark Requiem                      | 0.00% |
| 1924 | Chondrichthyes, Shark Scalloped Hammerhead         | 0.00% |
| 1925 | Chondrichthyes, Shark Small Pelagic                | 0.00% |
| 1926 | Chondrichthyes, Shark Tropical Reef                | 0.00% |
| 1927 | Chondrichthyes, Shark Wobbegong                    | 0.00% |
| 1928 | Chondrichthyes, Skate                              | 0.00% |
| 1929 | Chondrichthyes, Skate Common                       | 0.00% |
| 1930 | Chondrichthyes, Stingray Atlantic                  | 0.00% |
| 1931 | Chondrichthyes, Stingray Bigtoothed River          | 0.00% |
| 1932 | Chondrichthyes, Stingray Giant Freshwater          | 0.00% |
| 1933 | Chondrichthyes, Stingray Saltwater                 | 0.00% |
| 1934 | Chondrichthyes, Stingray Tiger River               | 0.00% |
| 1935 | Chondrichthyes, Stingray Tropical                  | 0.00% |
| 1936 | Chondrichthyes, Stingray Yellow                    | 0.00% |
| 1937 | Chondrichthyes, Wedgefish                          | 0.00% |
| 1938 | Crocodylia, Caiman Broad Nose                      | 0.00% |
| 1939 | Crocodylia, Crocodile Chinese                      | 0.00% |
| 1940 | Crocodylia, Crocodile West African Slender-Snouted | 0.00% |
| 1941 | Dermoptera, Colugo                                 | 0.00% |
| 1942 | Dermoptera, Colugo Sunda                           | 0.00% |
| 1943 | Insectivora, Endangered                            | 0.00% |
| 1944 | Insectivora, Hedgehog Four-Toed                    | 0.00% |
| 1945 | Insectivora, Insectivore                           | 0.00% |
| 1946 | Insectivora, Mammal                                | 0.00% |
| 1947 | Insectivora, Mole                                  | 0.00% |
| 1948 | Invertebrate, Abalone                              | 0.00% |
| 1949 | Invertebrate, Anemone Mushroom                     | 0.00% |
| 1950 | Invertebrate, Anemone Strawberry                   | 0.00% |
| 1951 | Invertebrate, Ant Bullet                           | 0.00% |
| 1952 | Invertebrate, Appalachian Elktoe                   | 0.00% |
| 1953 | Invertebrate, Aquatic Nematodes                    | 0.00% |

|      |                                                  |       |
|------|--------------------------------------------------|-------|
| 1954 | Invertebrate, Australian Corals                  | 0.00% |
| 1955 | Invertebrate, Barnacle                           | 0.00% |
| 1956 | Invertebrate, Bee Carpenter                      | 0.00% |
| 1957 | Invertebrate, Beetle Aloeus Ox                   | 0.00% |
| 1958 | Invertebrate, Beetle Blue Death Feigning         | 0.00% |
| 1959 | Invertebrate, Beetle Cape Stag                   | 0.00% |
| 1960 | Invertebrate, Beetle Darkling                    | 0.00% |
| 1961 | Invertebrate, Beetle Elephant                    | 0.00% |
| 1962 | Invertebrate, Beetle Endangered                  | 0.00% |
| 1963 | Invertebrate, Beetle Green June                  | 0.00% |
| 1964 | Invertebrate, Beetle Large                       | 0.00% |
| 1965 | Invertebrate, Beetle Puritan Tiger               | 0.00% |
| 1966 | Invertebrate, Beetle Water                       | 0.00% |
| 1967 | Invertebrate, Bivalves                           | 0.00% |
| 1968 | Invertebrate, Bug Assassin                       | 0.00% |
| 1969 | Invertebrate, Bumblebee Franklins                | 0.00% |
| 1970 | Invertebrate, Butterfly Amazon                   | 0.00% |
| 1971 | Invertebrate, Butterfly Ant-Blue                 | 0.00% |
| 1972 | Invertebrate, Butterfly Blue Morpho              | 0.00% |
| 1973 | Invertebrate, Butterfly Endangered Endemic       | 0.00% |
| 1974 | Invertebrate, Butterfly Fritillary Regal         | 0.00% |
| 1975 | Invertebrate, Butterfly Illidge's Ant-Blue       | 0.00% |
| 1976 | Invertebrate, Butterfly Lange's Metalmark        | 0.00% |
| 1977 | Invertebrate, Butterfly Morpho                   | 0.00% |
| 1978 | Invertebrate, Butterfly Neotropical              | 0.00% |
| 1979 | Invertebrate, Butterfly North America            | 0.00% |
| 1980 | Invertebrate, Butterfly North American           | 0.00% |
| 1981 | Invertebrate, Butterfly Palos Verdes Blue        | 0.00% |
| 1982 | Invertebrate, Butterfly Prairie                  | 0.00% |
| 1983 | Invertebrate, Butterfly Queen Alexandra Birdwing | 0.00% |
| 1984 | Invertebrate, Butterfly Quino Checkerspot        | 0.00% |
| 1985 | Invertebrate, Butterfly Skipper Laguna Mountain  | 0.00% |
| 1986 | Invertebrate, Clam                               | 0.00% |
| 1987 | Invertebrate, Clam North American                | 0.00% |
| 1988 | Invertebrate, Cnidaria                           | 0.00% |
| 1989 | Invertebrate, Cockroach Giant                    | 0.00% |
| 1990 | Invertebrate, Coelenterates                      | 0.00% |
| 1991 | Invertebrate, Conch Queen                        | 0.00% |
| 1992 | Invertebrate, Coneshell Cumberlandian            | 0.00% |
| 1993 | Invertebrate, Coral Aquacultured                 | 0.00% |
| 1994 | Invertebrate, Coral Elkhorn                      | 0.00% |
| 1995 | Invertebrate, Coral Hairy Mushroom               | 0.00% |
| 1996 | Invertebrate, Coral Montiporid                   | 0.00% |
| 1997 | Invertebrate, Coral Star                         | 0.00% |
| 1998 | Invertebrate, Coral Tree                         | 0.00% |
| 1999 | Invertebrate, Coral Tubastraea                   | 0.00% |
| 2000 | Invertebrate, Crab Blue                          | 0.00% |
| 2001 | Invertebrate, Crab Chesapeake Blue               | 0.00% |

|      |                                                   |       |
|------|---------------------------------------------------|-------|
| 2002 | Invertebrate, Crab Fiddler                        | 0.00% |
| 2003 | Invertebrate, Crab Horned Ghost                   | 0.00% |
| 2004 | Invertebrate, Crayfish New Zealand Giant          | 0.00% |
| 2005 | Invertebrate, Crayfish Spiny                      | 0.00% |
| 2006 | Invertebrate, Cricket                             | 0.00% |
| 2007 | Invertebrate, Crinoid                             | 0.00% |
| 2008 | Invertebrate, Crustacean Endangered               | 0.00% |
| 2009 | Invertebrate, Crustacean Oceanic                  | 0.00% |
| 2010 | Invertebrate, Dollar Sand                         | 0.00% |
| 2011 | Invertebrate, Earthworm                           | 0.00% |
| 2012 | Invertebrate, Insect Aquatic                      | 0.00% |
| 2013 | Invertebrate, Insect Desert                       | 0.00% |
| 2014 | Invertebrate, Insect Ecologically Important       | 0.00% |
| 2015 | Invertebrate, Insect Endemic To The Zoo's Region  | 0.00% |
| 2016 | Invertebrate, Insect House                        | 0.00% |
| 2017 | Invertebrate, Insect Invasive                     | 0.00% |
| 2018 | Invertebrate, Insect Island Stick                 | 0.00% |
| 2019 | Invertebrate, Insect Native                       | 0.00% |
| 2020 | Invertebrate, Insect North American               | 0.00% |
| 2021 | Invertebrate, Insect Savanna                      | 0.00% |
| 2022 | Invertebrate, Insect Species That Uses Camouflage | 0.00% |
| 2023 | Invertebrate, Insect Stick Peruphasma             | 0.00% |
| 2024 | Invertebrate, Insect Terrestrial                  | 0.00% |
| 2025 | Invertebrate, Insect Tundra                       | 0.00% |
| 2026 | Invertebrate, Isopod Giant                        | 0.00% |
| 2027 | Invertebrate, Isopod Lee Cty Cave                 | 0.00% |
| 2028 | Invertebrate, Jellyfish Comb                      | 0.00% |
| 2029 | Invertebrate, Jellyfish Moon Jelly                | 0.00% |
| 2030 | Invertebrate, Katydid Giant                       | 0.00% |
| 2031 | Invertebrate, Keystone                            | 0.00% |
| 2032 | Invertebrate, Lobster Slipper                     | 0.00% |
| 2033 | Invertebrate, Lobster Squat                       | 0.00% |
| 2034 | Invertebrate, Mantis Chinese                      | 0.00% |
| 2035 | Invertebrate, Mantis Dead Leaf                    | 0.00% |
| 2036 | Invertebrate, Moth Sphinx                         | 0.00% |
| 2037 | Invertebrate, Mussel Fan                          | 0.00% |
| 2038 | Invertebrate, Nymph Jungle                        | 0.00% |
| 2039 | Invertebrate, Scallop                             | 0.00% |
| 2040 | Invertebrate, Scorpion Emperor Red Clawed         | 0.00% |
| 2041 | Invertebrate, Scorpion False                      | 0.00% |
| 2042 | Invertebrate, Scorpion Large                      | 0.00% |
| 2043 | Invertebrate, Sea Apple                           | 0.00% |
| 2044 | Invertebrate, Shrimp Longhorn fairy               | 0.00% |
| 2045 | Invertebrate, Shrimp Peacock Mantis               | 0.00% |
| 2046 | Invertebrate, Shrimp Tropical Reef                | 0.00% |
| 2047 | Invertebrate, Skipper Field                       | 0.00% |
| 2048 | Invertebrate, Slug Banana                         | 0.00% |
| 2049 | Invertebrate, Snail Apple                         | 0.00% |

|      |                                                 |       |
|------|-------------------------------------------------|-------|
| 2050 | Invertebrate, Snail Painted Snake-Coiled Forest | 0.00% |
| 2051 | Invertebrate, Snail Plicate Rocksnail           | 0.00% |
| 2052 | Invertebrate, Snail Scaly-Foot                  | 0.00% |
| 2053 | Invertebrate, Spider Brown Recluse              | 0.00% |
| 2054 | Invertebrate, Spider Cave                       | 0.00% |
| 2055 | Invertebrate, Spider Harvestmen                 | 0.00% |
| 2056 | Invertebrate, Spider Orb Weaving                | 0.00% |
| 2057 | Invertebrate, Spider Red-Kneed Bird             | 0.00% |
| 2058 | Invertebrate, Spider Spruce-Fir Moss            | 0.00% |
| 2059 | Invertebrate, Spider Wolf                       | 0.00% |
| 2060 | Invertebrate, Squid Bobtail                     | 0.00% |
| 2061 | Invertebrate, Squid Giant                       | 0.00% |
| 2062 | Invertebrate, Star Sand                         | 0.00% |
| 2063 | Invertebrate, Starfish Brittle                  | 0.00% |
| 2064 | Invertebrate, Starfish Sunflower                | 0.00% |
| 2065 | Invertebrate, Starfish Temperate                | 0.00% |
| 2066 | Invertebrate, Stonefly Tahoe                    | 0.00% |
| 2067 | Invertebrate, Tarantula Brazilian Black         | 0.00% |
| 2068 | Invertebrate, Tarantula Old World               | 0.00% |
| 2069 | Invertebrate, Tarantula Pink Toe                | 0.00% |
| 2070 | Invertebrate, Unusual                           | 0.00% |
| 2071 | Invertebrate, Weta Giant                        | 0.00% |
| 2072 | Invertebrate, Winged                            | 0.00% |
| 2073 | Lagomorpha, Rabbit Giant                        | 0.00% |
| 2074 | Lagomorpha, Rabbit Pygmy                        | 0.00% |
| 2075 | Mammalia, Mammal                                | 0.00% |
| 2076 | Mammalia, Mammal Arctic                         | 0.00% |
| 2077 | Mammalia, Mammal Asian                          | 0.00% |
| 2078 | Mammalia, Mammal European                       | 0.00% |
| 2079 | Mammalia, Mammal Malagasy                       | 0.00% |
| 2080 | Mammalia, Mammal Marine Rescued                 | 0.00% |
| 2081 | Mammalia, Mammal North American                 | 0.00% |
| 2082 | Mammalia, Mammal Terrestrial                    | 0.00% |
| 2083 | Mammalia, Mammal Tundra                         | 0.00% |
| 2084 | Marsupialia, Bandicoot Eastern Barred           | 0.00% |
| 2085 | Marsupialia, Bandicoot Pig Footed               | 0.00% |
| 2086 | Marsupialia, Bettong Brush Tailed               | 0.00% |
| 2087 | Marsupialia, Bilby                              | 0.00% |
| 2088 | Marsupialia, Cuscus                             | 0.00% |
| 2089 | Marsupialia, Dibbler                            | 0.00% |
| 2090 | Marsupialia, Marsupial Large                    | 0.00% |
| 2091 | Marsupialia, Potoroo                            | 0.00% |
| 2092 | Marsupialia, Wallaby Rock                       | 0.00% |
| 2093 | Marsupialia, Wallaby Rufous Hare                | 0.00% |
| 2094 | Perissodactyla, Donkey African Wild             | 0.00% |
| 2095 | Perissodactyla, Donkey Domestic                 | 0.00% |
| 2096 | Perissodactyla, Horse American Heritage Breed   | 0.00% |
| 2097 | Perissodactyla, Kiang                           | 0.00% |

|      |                                                         |       |
|------|---------------------------------------------------------|-------|
| 2098 | Pisces, Anglerfish                                      | 0.00% |
| 2099 | Pisces, Bass Largemouth                                 | 0.00% |
| 2100 | Pisces, Billfish                                        | 0.00% |
| 2101 | Pisces, Chromis Green                                   | 0.00% |
| 2102 | Pisces, Cichlid Lake Malawi                             | 0.00% |
| 2103 | Pisces, Cichlid Midas                                   | 0.00% |
| 2104 | Pisces, Cichlid Pintstrip Damba                         | 0.00% |
| 2105 | Pisces, Cichlid South American                          | 0.00% |
| 2106 | Pisces, Damselfish Shadow                               | 0.00% |
| 2107 | Pisces, Dogfish Spiny                                   | 0.00% |
| 2108 | Pisces, Fish Anchovy                                    | 0.00% |
| 2109 | Pisces, Fish Ancient                                    | 0.00% |
| 2110 | Pisces, Fish Angelfish                                  | 0.00% |
| 2111 | Pisces, Fish Atlantic                                   | 0.00% |
| 2112 | Pisces, Fish Atlantic Pelagic                           | 0.00% |
| 2113 | Pisces, Fish Atlantic Reef                              | 0.00% |
| 2114 | Pisces, Fish Atlantic Tarpon                            | 0.00% |
| 2115 | Pisces, Fish Australian Exhibit                         | 0.00% |
| 2116 | Pisces, Fish Australian Rainbow                         | 0.00% |
| 2117 | Pisces, Fish Australian Reef                            | 0.00% |
| 2118 | Pisces, Fish Bannerfish                                 | 0.00% |
| 2119 | Pisces, Fish Barracuda                                  | 0.00% |
| 2120 | Pisces, Fish Bass                                       | 0.00% |
| 2121 | Pisces, Fish Batfish                                    | 0.00% |
| 2122 | Pisces, Fish Bay                                        | 0.00% |
| 2123 | Pisces, Fish Blow                                       | 0.00% |
| 2124 | Pisces, Fish Bluegill                                   | 0.00% |
| 2125 | Pisces, Fish Captive-Bred Reef                          | 0.00% |
| 2126 | Pisces, Fish Cardinal                                   | 0.00% |
| 2127 | Pisces, Fish Carribean                                  | 0.00% |
| 2128 | Pisces, Fish China Rock                                 | 0.00% |
| 2129 | Pisces, Fish Common Sawfish                             | 0.00% |
| 2130 | Pisces, Fish Cowfish                                    | 0.00% |
| 2131 | Pisces, Fish Critically Endangered Fresh And Salt Water | 0.00% |
| 2132 | Pisces, Fish Croaker                                    | 0.00% |
| 2133 | Pisces, Fish Darter Native                              | 0.00% |
| 2134 | Pisces, Fish Discus                                     | 0.00% |
| 2135 | Pisces, Fish Ecologically Significant Species           | 0.00% |
| 2136 | Pisces, Fish Eel Coral Reef                             | 0.00% |
| 2137 | Pisces, Fish Eel Moray California                       | 0.00% |
| 2138 | Pisces, Fish Endemic Stream                             | 0.00% |
| 2139 | Pisces, Fish European                                   | 0.00% |
| 2140 | Pisces, Fish Ghost Catfish                              | 0.00% |
| 2141 | Pisces, Fish Grouper Nassau                             | 0.00% |
| 2142 | Pisces, Fish Grouper Warsaw                             | 0.00% |
| 2143 | Pisces, Fish Kelp Forest                                | 0.00% |
| 2144 | Pisces, Fish Lake                                       | 0.00% |
| 2145 | Pisces, Fish Large                                      | 0.00% |

|      |                                                     |       |
|------|-----------------------------------------------------|-------|
| 2146 | Pisces, Fish Large And Small                        | 0.00% |
| 2147 | Pisces, Fish Large Freshwater                       | 0.00% |
| 2148 | Pisces, Fish Large Predatory                        | 0.00% |
| 2149 | Pisces, Fish Leon Springs Pupfish                   | 0.00% |
| 2150 | Pisces, Fish Lumpfish                               | 0.00% |
| 2151 | Pisces, Fish Mahi Mahi                              | 0.00% |
| 2152 | Pisces, Fish Mangrove                               | 0.00% |
| 2153 | Pisces, Fish Marine Ornamental                      | 0.00% |
| 2154 | Pisces, Fish Minnow Rio Grande Silvery              | 0.00% |
| 2155 | Pisces, Fish Minnow Top                             | 0.00% |
| 2156 | Pisces, Fish Mudskipper                             | 0.00% |
| 2157 | Pisces, Fish Narrow Sawfish                         | 0.00% |
| 2158 | Pisces, Fish Native Freshwater                      | 0.00% |
| 2159 | Pisces, Fish Native North American Freshwater       | 0.00% |
| 2160 | Pisces, Fish North American Salmon                  | 0.00% |
| 2161 | Pisces, Fish North American Stream                  | 0.00% |
| 2162 | Pisces, Fish Oarfish                                | 0.00% |
| 2163 | Pisces, Fish Pacific Pelagic                        | 0.00% |
| 2164 | Pisces, Fish Pacific Reef                           | 0.00% |
| 2165 | Pisces, Fish Pecos Pupfish                          | 0.00% |
| 2166 | Pisces, Fish Pelagic                                | 0.00% |
| 2167 | Pisces, Fish Polar                                  | 0.00% |
| 2168 | Pisces, Fish Porcupine                              | 0.00% |
| 2169 | Pisces, Fish Predatory                              | 0.00% |
| 2170 | Pisces, Fish Queen Triggerfish                      | 0.00% |
| 2171 | Pisces, Fish Ratfish                                | 0.00% |
| 2172 | Pisces, Fish Regional Species Aquarium              | 0.00% |
| 2173 | Pisces, Fish RockFish, Sebastidae                   | 0.00% |
| 2174 | Pisces, Fish Salmon Alaskan                         | 0.00% |
| 2175 | Pisces, Fish Salmon Coho                            | 0.00% |
| 2176 | Pisces, Fish Schooling Marine                       | 0.00% |
| 2177 | Pisces, Fish Schooling Pelagic                      | 0.00% |
| 2178 | Pisces, Fish Sea Horses And Pipe                    | 0.00% |
| 2179 | Pisces, Fish Shiner Native                          | 0.00% |
| 2180 | Pisces, Fish Small Coral Reef                       | 0.00% |
| 2181 | Pisces, Fish Small Selection Of From Each Continent | 0.00% |
| 2182 | Pisces, Fish Small Temperate                        | 0.00% |
| 2183 | Pisces, Fish Small, Colorful, Schooling Freshwater  | 0.00% |
| 2184 | Pisces, Fish Snake Head                             | 0.00% |
| 2185 | Pisces, Fish South American Lung                    | 0.00% |
| 2186 | Pisces, Fish Striped Burrfish                       | 0.00% |
| 2187 | Pisces, Fish Sturgeon Russian                       | 0.00% |
| 2188 | Pisces, Fish Sustainable Populations                | 0.00% |
| 2189 | Pisces, Fish Sword                                  | 0.00% |
| 2190 | Pisces, Fish Temperate Marine                       | 0.00% |
| 2191 | Pisces, Fish Temperate Rockfish                     | 0.00% |
| 2192 | Pisces, Fish Tetra                                  | 0.00% |
| 2193 | Pisces, Fish Tropical Schooling                     | 0.00% |

|      |                                   |       |
|------|-----------------------------------|-------|
| 2194 | Pisces, Fish US Native SunFish    | 0.00% |
| 2195 | Pisces, Fish Very Large Amazonian | 0.00% |
| 2196 | Pisces, Fish Warm Water           | 0.00% |
| 2197 | Pisces, Fish Wrass Blue Head      | 0.00% |
| 2198 | Pisces, Fish Wrass Napoleon       | 0.00% |
| 2199 | Pisces, Fish Yellow Tang          | 0.00% |
| 2200 | Pisces, Fish Yelloweye Rock       | 0.00% |
| 2201 | Pisces, Fish Yellowfish           | 0.00% |
| 2202 | Pisces, Giant Pangasius           | 0.00% |
| 2203 | Pisces, Goby Neon                 | 0.00% |
| 2204 | Pisces, Grouper Peacock           | 0.00% |
| 2205 | Pisces, Herring                   | 0.00% |
| 2206 | Pisces, Menhaden                  | 0.00% |
| 2207 | Pisces, Minnows & Shiners Native  | 0.00% |
| 2208 | Pisces, Pupfish                   | 0.00% |
| 2209 | Pisces, Roughy Orange             | 0.00% |
| 2210 | Pisces, Sculpin                   | 0.00% |
| 2211 | Pisces, Sucker June               | 0.00% |
| 2212 | Pisces, Tang                      | 0.00% |
| 2213 | Pisces, Tarpon                    | 0.00% |
| 2214 | Pisces, Tautog                    | 0.00% |
| 2215 | Pisces, Teleosts                  | 0.00% |
| 2216 | Pisces, Toothcarp Valencia        | 0.00% |
| 2217 | Plankton, Plankton                | 0.00% |
| 2218 | Plankton, Zooplankton             | 0.00% |
| 2219 | Primates, Ape Endangered          | 0.00% |
| 2220 | Primates, Arboreal                | 0.00% |
| 2221 | Primates, Baboon Hamadryas        | 0.00% |
| 2222 | Primates, Capuchin Brown          | 0.00% |
| 2223 | Primates, Central America         | 0.00% |
| 2224 | Primates, Chimpanzee Western      | 0.00% |
| 2225 | Primates, Gibbon Hoolock          | 0.00% |
| 2226 | Primates, Gibbon Silvery          | 0.00% |
| 2227 | Primates, Gorilla Cross River     | 0.00% |
| 2228 | Primates, Gorilla Forest          | 0.00% |
| 2229 | Primates, Langur Asian            | 0.00% |
| 2230 | Primates, Lemur Black             | 0.00% |
| 2231 | Primates, Lemur Common Brown      | 0.00% |
| 2232 | Primates, Lemur Crowned           | 0.00% |
| 2233 | Primates, Lemur Golden Bamboo     | 0.00% |
| 2234 | Primates, Lemur Ruffed            | 0.00% |
| 2235 | Primates, Lemur Sifaka Coquerels  | 0.00% |
| 2236 | Primates, Lemur Sifaka Eastern    | 0.00% |
| 2237 | Primates, Mangabey Black          | 0.00% |
| 2238 | Primates, Marmoset Golden         | 0.00% |
| 2239 | Primates, Mid-Size                | 0.00% |
| 2240 | Primates, Monkey Black Howler     | 0.00% |
| 2241 | Primates, Monkey Black Spider     | 0.00% |

|      |                                                 |       |
|------|-------------------------------------------------|-------|
| 2242 | Primates, Monkey Blue                           | 0.00% |
| 2243 | Primates, Monkey Brown Spider                   | 0.00% |
| 2244 | Primates, Monkey Capuchin White Face            | 0.00% |
| 2245 | Primates, Monkey Dusky Leaf                     | 0.00% |
| 2246 | Primates, Monkey East Asian                     | 0.00% |
| 2247 | Primates, Monkey Goeldi's                       | 0.00% |
| 2248 | Primates, Monkey Golden Snub-Nosed              | 0.00% |
| 2249 | Primates, Monkey Guenon Schmidt's Red Tailed    | 0.00% |
| 2250 | Primates, Monkey Large                          | 0.00% |
| 2251 | Primates, Monkey Muriquis                       | 0.00% |
| 2252 | Primates, Monkey Prehensile Tail                | 0.00% |
| 2253 | Primates, Monkey Silvery Lutung                 | 0.00% |
| 2254 | Primates, Monkey Snub-Nosed                     | 0.00% |
| 2255 | Primates, Monkey Southeast Asian                | 0.00% |
| 2256 | Primates, Monkey Syke's                         | 0.00% |
| 2257 | Primates, Monkey Tiny                           | 0.00% |
| 2258 | Primates, Monkey Venezuelan Red Howler          | 0.00% |
| 2259 | Primates, New World Endangered                  | 0.00% |
| 2260 | Primates, Old World Endangered                  | 0.00% |
| 2261 | Primates, Orangutan Malaysian                   | 0.00% |
| 2262 | Primates, Orangutan Tapanuli                    | 0.00% |
| 2263 | Primates, Small Nocturnal                       | 0.00% |
| 2264 | Primates, Tamarin Black Lion                    | 0.00% |
| 2265 | Reptile, Aquatic Reptiles                       | 0.00% |
| 2266 | Reptile, Australian Reptiles                    | 0.00% |
| 2267 | Reptilia, Reptile and Amphibian Rainforest      | 0.00% |
| 2268 | Reptilia, Reptile and Amphibians Asian          | 0.00% |
| 2269 | Reptilia, Reptile and Amphibians Malagasy       | 0.00% |
| 2270 | Reptilia, Reptile and Amphibians Native         | 0.00% |
| 2271 | Reptilia, Reptile and Amphibians North American | 0.00% |
| 2272 | Reptilia, Reptile Arboreal                      | 0.00% |
| 2273 | Reptilia, Reptile European                      | 0.00% |
| 2274 | Reptilia, Reptile Local                         | 0.00% |
| 2275 | Reptilia, Reptile Malagasy                      | 0.00% |
| 2276 | Reptilia, Reptile Nonvenomous                   | 0.00% |
| 2277 | Reptilia, Reptile Savanna                       | 0.00% |
| 2278 | Reptilia, Reptile Small                         | 0.00% |
| 2279 | Reptilia, Reptile Terrestrial                   | 0.00% |
| 2280 | Reptilia, Reptile Tundra                        | 0.00% |
| 2281 | Rodentia, Acouchi                               | 0.00% |
| 2282 | Rodentia, Beaver Mongolian                      | 0.00% |
| 2283 | Rodentia, Chuck Wood                            | 0.00% |
| 2284 | Rodentia, Degu                                  | 0.00% |
| 2285 | Rodentia, Dog Prairie Mexican                   | 0.00% |
| 2286 | Rodentia, Hutia                                 | 0.00% |
| 2287 | Rodentia, Jerboa                                | 0.00% |
| 2288 | Rodentia, Large Rodents                         | 0.00% |
| 2289 | Rodentia, Mouse Domestic                        | 0.00% |

|      |                                           |       |
|------|-------------------------------------------|-------|
| 2290 | Rodentia, Mouse European Harvest          | 0.00% |
| 2291 | Rodentia, Mouse Grasshopper               | 0.00% |
| 2292 | Rodentia, Mouse Spiny                     | 0.00% |
| 2293 | Rodentia, Pig Guinea                      | 0.00% |
| 2294 | Rodentia, Porcupine Asian                 | 0.00% |
| 2295 | Rodentia, Porcupine Bristle-Spined        | 0.00% |
| 2296 | Rodentia, Porcupine Cape                  | 0.00% |
| 2297 | Rodentia, Porcupine Hystrix               | 0.00% |
| 2298 | Rodentia, Rat African Jumping             | 0.00% |
| 2299 | Rodentia, Rat Tree Red Crested            | 0.00% |
| 2300 | Rodentia, Rat Wood Key Largo              | 0.00% |
| 2301 | Rodentia, Springhaas                      | 0.00% |
| 2302 | Rodentia, Squirrel Asian                  | 0.00% |
| 2303 | Rodentia, Squirrel Prevost                | 0.00% |
| 2304 | Sirenia, Manatee Amazonian                | 0.00% |
| 2305 | Sirenia, Manatee Florida                  | 0.00% |
| 2306 | Squamata, Ackie Red Yellow                | 0.00% |
| 2307 | Squamata, Boa Amazon Tree                 | 0.00% |
| 2308 | Squamata, Boa Dumeril's                   | 0.00% |
| 2309 | Squamata, Boa Kenyan Sand                 | 0.00% |
| 2310 | Squamata, Boa Madagascar Ground           | 0.00% |
| 2311 | Squamata, Boa Rosy                        | 0.00% |
| 2312 | Squamata, Chameleon Lesser                | 0.00% |
| 2313 | Squamata, Chameleon Malagasy              | 0.00% |
| 2314 | Squamata, Chameleon Minute Leaf           | 0.00% |
| 2315 | Squamata, Chameleon Panther               | 0.00% |
| 2316 | Squamata, Chameleon Pygmy                 | 0.00% |
| 2317 | Squamata, Chameleon Rhampholeon Hattinghi | 0.00% |
| 2318 | Squamata, Chameleon Tarzan                | 0.00% |
| 2319 | Squamata, Cobra Black And White Spitting  | 0.00% |
| 2320 | Squamata, Cobra Endangered                | 0.00% |
| 2321 | Squamata, Gecko Chinese Cave              | 0.00% |
| 2322 | Squamata, Gecko Giant Bronze              | 0.00% |
| 2323 | Squamata, Gecko Golden Spiny Tail         | 0.00% |
| 2324 | Squamata, Gecko Leopard                   | 0.00% |
| 2325 | Squamata, Gecko Malagasy                  | 0.00% |
| 2326 | Squamata, Gecko New Caledonia Giant       | 0.00% |
| 2327 | Squamata, Gecko Standings Day             | 0.00% |
| 2328 | Squamata, Gecko Tokay                     | 0.00% |
| 2329 | Squamata, Gecko Western Chameleon         | 0.00% |
| 2330 | Squamata, Iguana Barrington Land          | 0.00% |
| 2331 | Squamata, Iguana Cuban                    | 0.00% |
| 2332 | Squamata, Iguana Cyclurid                 | 0.00% |
| 2333 | Squamata, Iguana Fiji Crested             | 0.00% |
| 2334 | Squamata, Iguana Fiji Island              | 0.00% |
| 2335 | Squamata, Iguana New World                | 0.00% |
| 2336 | Squamata, Iguana Rock Endangered          | 0.00% |
| 2337 | Squamata, Lizard Agama                    | 0.00% |

|      |                                             |       |
|------|---------------------------------------------|-------|
| 2338 | Squamata, Lizard Anole                      | 0.00% |
| 2339 | Squamata, Lizard Anole Honduran Giant       | 0.00% |
| 2340 | Squamata, Lizard Asian Water Monitor        | 0.00% |
| 2341 | Squamata, Lizard Chinese Crocodile          | 0.00% |
| 2342 | Squamata, Lizard Emerald Tree Monitor       | 0.00% |
| 2343 | Squamata, Lizard Forest                     | 0.00% |
| 2344 | Squamata, Lizard Gila Beaded                | 0.00% |
| 2345 | Squamata, Lizard Legless                    | 0.00% |
| 2346 | Squamata, Lizard Monitor Spiny Tail         | 0.00% |
| 2347 | Squamata, Lizard North America              | 0.00% |
| 2348 | Squamata, Lizard Perentie Monitor           | 0.00% |
| 2349 | Squamata, Lizard Sailfin                    | 0.00% |
| 2350 | Squamata, Lizard Southeast Asia             | 0.00% |
| 2351 | Squamata, Lizard Spineless Forest           | 0.00% |
| 2352 | Squamata, Lizard Spiny-Toed                 | 0.00% |
| 2353 | Squamata, Lizard Thorny Devil               | 0.00% |
| 2354 | Squamata, Lizard Whiptail                   | 0.00% |
| 2355 | Squamata, Megafauna African                 | 0.00% |
| 2356 | Squamata, Monitor African                   | 0.00% |
| 2357 | Squamata, Monitor Bornean Earless           | 0.00% |
| 2358 | Squamata, Monitor Desert                    | 0.00% |
| 2359 | Squamata, Monitor Gray's                    | 0.00% |
| 2360 | Squamata, Monitor Nile                      | 0.00% |
| 2361 | Squamata, Monitor Perentie                  | 0.00% |
| 2362 | Squamata, Monitor Philippine Fruit Eating   | 0.00% |
| 2363 | Squamata, Monitor Savannah                  | 0.00% |
| 2364 | Squamata, Python Arboreal                   | 0.00% |
| 2365 | Squamata, Python Black-Headed               | 0.00% |
| 2366 | Squamata, Python Timor                      | 0.00% |
| 2367 | Squamata, Python Tree                       | 0.00% |
| 2368 | Squamata, Rattlesnake Eastern Massasauga    | 0.00% |
| 2369 | Squamata, Skink Blue Tongued                | 0.00% |
| 2370 | Squamata, Skink Christmas Island Whiptail   | 0.00% |
| 2371 | Squamata, Skink Legless Burrowing           | 0.00% |
| 2372 | Squamata, Skink Mole Blue Tailed            | 0.00% |
| 2373 | Squamata, Skink Round Island                | 0.00% |
| 2374 | Squamata, Skink Shingleback                 | 0.00% |
| 2375 | Squamata, Snake African Egg-Eating          | 0.00% |
| 2376 | Squamata, Snake African Savanna             | 0.00% |
| 2377 | Squamata, Snake Australian                  | 0.00% |
| 2378 | Squamata, Snake Diamond Back Eastern Rattle | 0.00% |
| 2379 | Squamata, Snake Dusky Sea                   | 0.00% |
| 2380 | Squamata, Snake Fer-de-lance                | 0.00% |
| 2381 | Squamata, Snake Flying                      | 0.00% |
| 2382 | Squamata, Snake Forest                      | 0.00% |
| 2383 | Squamata, Snake From Africa/Asia            | 0.00% |
| 2384 | Squamata, Snake Giant Garter                | 0.00% |
| 2385 | Squamata, Snake Gray-Banded Kingsnake       | 0.00% |

|      |                                                         |       |
|------|---------------------------------------------------------|-------|
| 2386 | Squamata, Snake Local                                   | 0.00% |
| 2387 | Squamata, Snake Madagascar Blind                        | 0.00% |
| 2388 | Squamata, Snake Mountain Rattle                         | 0.00% |
| 2389 | Squamata, Snake Native Non-Venomous                     | 0.00% |
| 2390 | Squamata, Snake Neotropical                             | 0.00% |
| 2391 | Squamata, Snake North American Threatened               | 0.00% |
| 2392 | Squamata, Snake Racer                                   | 0.00% |
| 2393 | Squamata, Snake Racer Speckled                          | 0.00% |
| 2394 | Squamata, Snake Roatan Coral                            | 0.00% |
| 2395 | Squamata, Snake Rough-Backed Litter                     | 0.00% |
| 2396 | Squamata, Snake Small Native                            | 0.00% |
| 2397 | Squamata, Snake Small Venomous                          | 0.00% |
| 2398 | Squamata, Snake Timber Rattlesnake                      | 0.00% |
| 2399 | Squamata, Snake Tropical                                | 0.00% |
| 2400 | Squamata, Snake Venomous Endangered                     | 0.00% |
| 2401 | Squamata, Snake Viper African Gaboon                    | 0.00% |
| 2402 | Squamata, Snake Viper Arboreal                          | 0.00% |
| 2403 | Squamata, Snake Viper Bush                              | 0.00% |
| 2404 | Squamata, Snake Viper Common European                   | 0.00% |
| 2405 | Squamata, Snake Viper Eastern European Species          | 0.00% |
| 2406 | Squamata, Snake Viper Ethiopian Mountain                | 0.00% |
| 2407 | Squamata, Snake Viper Horned Pit                        | 0.00% |
| 2408 | Squamata, Snake Viper Multiple Species Of Colorful      | 0.00% |
| 2409 | Squamata, Snake Viper Pit Central American Cloud Forest | 0.00% |
| 2410 | Squamata, Snake Viper Sahara Sand                       | 0.00% |
| 2411 | Squamata, Snake Viper Sand                              | 0.00% |
| 2412 | Squamata, Snake Viper Saw Scaled                        | 0.00% |
| 2413 | Squamata, Snake Viper Usambara Eyelash                  | 0.00% |
| 2414 | Squamata, Snake Western Ground                          | 0.00% |
| 2415 | Squamata, Snake Yellow-Bellied Sea                      | 0.00% |
| 2416 | Xenarthra, Armadillo Nine-Banded                        | 0.00% |
| 2417 | Xenarthra, Armadillo Six-Banded                         | 0.00% |
| 2418 | Xenarthra, Armadillo South America                      | 0.00% |
| 2419 | Xenarthra, Endangered                                   | 0.00% |
| 2420 | Xenarthra, Pangolin Chinese                             | 0.00% |
| 2421 | Xenarthra, Pangolin Giant                               | 0.00% |
| 2422 | Xenarthra, Pangolin Long tailed                         | 0.00% |
| 2423 | Xenarthra, Pangolin Sunda                               | 0.00% |
| 2424 | Xenarthra, Pangolin Temminck's Ground                   | 0.00% |
| 2425 | Xenarthra, Pangolin Tree                                | 0.00% |
| 2426 | Xenarthra, Sloth Rainforest Threatened                  | 0.00% |

| AZA Directors (n=3,203 votes cast) |                       |         |
|------------------------------------|-----------------------|---------|
| Rank                               | Animal Name           | % Votes |
| 1                                  | Artiodactyla, Giraffe | 2.06%   |
| 2                                  | Proboscidea, Elephant | 1.65%   |
| 3                                  | Carnivora, Lion       | 1.65%   |

|    |                               |       |
|----|-------------------------------|-------|
| 4  | Carnivora, Tiger              | 1.37% |
| 5  | Aves, Penguin                 | 1.31% |
| 6  | Perissodactyla, Zebra         | 1.19% |
| 7  | Primates, Gorilla             | 1.19% |
| 8  | Artiodactyla, Hippopotamus    | 1.16% |
| 9  | Chondrichthyes, Shark         | 1.16% |
| 10 | Carnivora, Panda Red          | 1.03% |
| 11 | Carnivora, Jaguar             | 0.94% |
| 12 | Carnivora, Bear Polar         | 0.91% |
| 13 | Carnivora, Cheetah            | 0.91% |
| 14 | Primates, Chimpanzee          | 0.91% |
| 15 | Invertebrate, Coral           | 0.84% |
| 16 | Marsupialia, Koala            | 0.81% |
| 17 | Artiodactyla, Okapi           | 0.78% |
| 18 | Carnivora, Otter River        | 0.78% |
| 19 | Primates, Orangutan           | 0.78% |
| 20 | Aves, Flamingo                | 0.75% |
| 21 | Carnivora, Dog African Wild   | 0.72% |
| 22 | Xenarthra, Sloth              | 0.72% |
| 23 | Artiodactyla, Bison           | 0.69% |
| 24 | Carnivora, Bear               | 0.66% |
| 25 | Carnivora, Leopard Snow       | 0.66% |
| 26 | Chelonia, Turtle Sea          | 0.66% |
| 27 | Perissodactyla, Tapir         | 0.66% |
| 28 | Pisces, Fish Seahorse         | 0.66% |
| 29 | Primates, Lemur               | 0.66% |
| 30 | Carnivora, Sea Lion           | 0.62% |
| 31 | Aves, Crane                   | 0.59% |
| 32 | Invertebrate, Octopus         | 0.59% |
| 33 | Primates, Gibbon              | 0.59% |
| 34 | Primates, New World           | 0.59% |
| 35 | Rodentia, Capybara            | 0.59% |
| 36 | Squamata, Dragon Komodo       | 0.59% |
| 37 | Aves, Hornbill                | 0.56% |
| 38 | Aves, Raptor                  | 0.56% |
| 39 | Primates, Ape Great           | 0.56% |
| 40 | Carnivora, Leopard            | 0.53% |
| 41 | Crocodylia, Alligator         | 0.53% |
| 42 | Proboscidea, Elephant African | 0.50% |
| 43 | Aves, Vulture                 | 0.50% |
| 44 | Chiroptera, Bat               | 0.50% |
| 45 | Artiodactyla, Bongo           | 0.47% |
| 46 | Aves, Toucan                  | 0.47% |
| 47 | Carnivora, Hyena              | 0.47% |
| 48 | Carnivora, Meerkat            | 0.47% |
| 49 | Invertebrate, Butterfly       | 0.47% |
| 50 | Marsupialia, Kangaroo         | 0.47% |
| 51 | Amphibia, Frog Poison Dart    | 0.44% |

|    |                                  |       |
|----|----------------------------------|-------|
| 52 | Artiodactyla, Warthog            | 0.44% |
| 53 | Aves, Eagle Bald                 | 0.44% |
| 54 | Carnivora, Bear Grizzly          | 0.44% |
| 55 | Primates, Old World              | 0.44% |
| 56 | Aves, Kookaburra                 | 0.41% |
| 57 | Chondrichthyes, Ray              | 0.41% |
| 58 | Artiodactyla, Camel              | 0.37% |
| 59 | Artiodactyla, Duiker Zebra       | 0.37% |
| 60 | Proboscidea, Elephant Asian      | 0.37% |
| 61 | Artiodactyla, Takin              | 0.37% |
| 62 | Aves, Ostrich                    | 0.37% |
| 63 | Carnivora, Binturong             | 0.37% |
| 64 | Carnivora, Otter                 | 0.37% |
| 65 | Carnivora, Puma                  | 0.37% |
| 66 | Cetacea, Dolphin                 | 0.37% |
| 67 | Chelonia, Tortoise Galapagos     | 0.37% |
| 68 | Perissodactyla, Rhinoceros White | 0.37% |
| 69 | Primates, Orangutan Sumatran     | 0.37% |
| 70 | Sirenia, Manatee                 | 0.37% |
| 71 | Squamata, Rattlesnake            | 0.37% |
| 72 | Xenarthra, Pangolin              | 0.37% |
| 73 | Artiodactyla, Antelope           | 0.34% |
| 74 | Carnivora, Panda Giant           | 0.34% |
| 75 | Chelonia, Tortoise Large         | 0.34% |
| 76 | Crocodylia, Crocodile            | 0.34% |
| 77 | Rodentia, Porcupine              | 0.34% |
| 78 | Xenarthra, Armadillo             | 0.34% |
| 79 | Aves, Stork                      | 0.31% |
| 80 | Carnivora, Bear Sloth            | 0.31% |
| 81 | Carnivora, Ferret Black Footed   | 0.31% |
| 82 | Carnivora, Panda                 | 0.31% |
| 83 | Chelonia, Tortoise               | 0.31% |
| 84 | Perissodactyla, Rhinoceros Black | 0.31% |
| 85 | Primates, Tamarin                | 0.31% |
| 86 | Xenarthra, Anteater              | 0.31% |
| 87 | Xenarthra, Anteater Giant        | 0.31% |
| 88 | Artiodactyla, Hog Red River      | 0.28% |
| 89 | Aves, Condor California          | 0.28% |
| 90 | Aves, Macaw                      | 0.28% |
| 91 | Carnivora, Cat Small             | 0.28% |
| 92 | Carnivora, Leopard Clouded       | 0.28% |
| 93 | Carnivora, Seal                  | 0.28% |
| 94 | Carnivora, Wolf Gray             | 0.28% |
| 95 | Primates, Lemur Ring-Tailed      | 0.28% |
| 96 | Primates, Mandrill               | 0.28% |
| 97 | Primates, Marmoset               | 0.28% |
| 98 | Primates, Siamang                | 0.28% |
| 99 | Artiodactyla, Deer Moose         | 0.25% |

|     |                                          |       |
|-----|------------------------------------------|-------|
| 100 | Aves, Hornbill Ground                    | 0.25% |
| 101 | Carnivora, Ocelot                        | 0.25% |
| 102 | Carnivora, Serval                        | 0.25% |
| 103 | Carnivora, Tiger Amur                    | 0.25% |
| 104 | Carnivora, Walrus                        | 0.25% |
| 105 | Carnivora, Wolf Red                      | 0.25% |
| 106 | Cetacea, Whale                           | 0.25% |
| 107 | Chelonia, Turtle                         | 0.25% |
| 108 | Chelonia, Turtle Freshwater              | 0.25% |
| 109 | Chondrichthyes, Stingray                 | 0.25% |
| 110 | Crocodylia, Crocodilia                   | 0.25% |
| 111 | Perissodactyla, Horse Przewalski         | 0.25% |
| 112 | Reptilia, Reptile                        | 0.25% |
| 113 | Squamata, Boa Constrictor                | 0.25% |
| 114 | Artiodactyla, Pronghorn                  | 0.22% |
| 115 | Aves, Crane Crowned                      | 0.22% |
| 116 | Aves, Pheasant                           | 0.22% |
| 117 | Aves, Ratite Cassowary                   | 0.22% |
| 118 | Aves, Shorebird                          | 0.22% |
| 119 | Carnivora, Leopard Amur                  | 0.22% |
| 120 | Carnivora, Wolf Maned                    | 0.22% |
| 121 | Primates, Ape                            | 0.22% |
| 122 | Primates, Aye Aye                        | 0.22% |
| 123 | Primates, Bonobo                         | 0.22% |
| 124 | Primates, Monkey Black-and-White Colobus | 0.22% |
| 125 | Primates, Monkey Spider                  | 0.22% |
| 126 | Primates, Primate                        | 0.22% |
| 127 | Primates, Tamarin Golden Lion            | 0.22% |
| 128 | Tubulidentata, Aardvark                  | 0.22% |
| 129 | Artiodactyla, Babirusa                   | 0.19% |
| 130 | Artiodactyla, Deer                       | 0.19% |
| 131 | Artiodactyla, Gazelle                    | 0.19% |
| 132 | Artiodactyla, Hippopotamus Pygmy         | 0.19% |
| 133 | Aves, Condor                             | 0.19% |
| 134 | Aves, Crane Whooping                     | 0.19% |
| 135 | Aves, Emu                                | 0.19% |
| 136 | Aves, Pelican                            | 0.19% |
| 137 | Aves, Puffin                             | 0.19% |
| 138 | Aves, Ratite                             | 0.19% |
| 139 | Aves, Spoonbill                          | 0.19% |
| 140 | Aves, Waterfowl                          | 0.19% |
| 141 | Carnivora, Dog Bush                      | 0.19% |
| 142 | Carnivora, Fox                           | 0.19% |
| 143 | Carnivora, Large                         | 0.19% |
| 144 | Carnivora, Otter Giant                   | 0.19% |
| 145 | Chelonia, Tortoise Aldabra Giant         | 0.19% |
| 146 | Invertebrate, Bee                        | 0.19% |
| 147 | Marsupialia, Kangaroo Tree Matschie's    | 0.19% |

|     |                                        |       |
|-----|----------------------------------------|-------|
| 148 | Monotremata, Platypus                  | 0.19% |
| 149 | Primates, Monkey Howler                | 0.19% |
| 150 | Rodentia, Rat Mole                     | 0.19% |
| 151 | Squamata, Chameleon                    | 0.19% |
| 152 | Squamata, Iguana                       | 0.19% |
| 153 | Squamata, Lizard                       | 0.19% |
| 154 | Squamata, Monster Gila                 | 0.19% |
| 155 | Artiodactyla, Camel Bactrian           | 0.16% |
| 156 | Artiodactyla, Elk                      | 0.16% |
| 157 | Artiodactyla, Gerenuk                  | 0.16% |
| 158 | Artiodactyla, Hoofstock                | 0.16% |
| 159 | Artiodactyla, Impala                   | 0.16% |
| 160 | Artiodactyla, Wildebeest               | 0.16% |
| 161 | Aves, Bird Rainforest                  | 0.16% |
| 162 | Aves, Condor Andean                    | 0.16% |
| 163 | Aves, Frogmouth                        | 0.16% |
| 164 | Aves, Kiwi                             | 0.16% |
| 165 | Aves, Macaw Hyacinth                   | 0.16% |
| 166 | Aves, Parrot Thick Billed              | 0.16% |
| 167 | Aves, Pigeon Crowned                   | 0.16% |
| 168 | Aves, Songbird                         | 0.16% |
| 169 | Aves, Stork Marabou                    | 0.16% |
| 170 | Aves, Swan                             | 0.16% |
| 171 | Aves, Vulture King                     | 0.16% |
| 172 | Carnivora, Bear Spectacled             | 0.16% |
| 173 | Carnivora, Bear Sun                    | 0.16% |
| 174 | Carnivora, Wolf Mexican Gray           | 0.16% |
| 175 | Carnivora, Wolverine                   | 0.16% |
| 176 | Cetacea, Whale Beluga                  | 0.16% |
| 177 | Chelonia, Tortoise Radiated            | 0.16% |
| 178 | Invertebrate, Starfish                 | 0.16% |
| 179 | Invertebrate, Tarantula                | 0.16% |
| 180 | Perissodactyla, Tapir Malayan          | 0.16% |
| 181 | Primates, Callitrichids                | 0.16% |
| 182 | Primates, Lemur Black and White Ruffed | 0.16% |
| 183 | Primates, Tamarin Cotton Top           | 0.16% |
| 184 | Rodentia, Beaver                       | 0.16% |
| 185 | Squamata, Cobra King                   | 0.16% |
| 186 | Amphibia, Hellbender                   | 0.12% |
| 187 | Artiodactyla, Buffalo Cape             | 0.12% |
| 188 | Artiodactyla, Gazelle Thomsons         | 0.12% |
| 189 | Artiodactyla, Kudu                     | 0.12% |
| 190 | Artiodactyla, Kudu Greater             | 0.12% |
| 191 | Artiodactyla, Oryx                     | 0.12% |
| 192 | Artiodactyla, Oryx Scimitar            | 0.12% |
| 193 | Artiodactyla, Peccary                  | 0.12% |
| 194 | Artiodactyla, Pig                      | 0.12% |
| 195 | Artiodactyla, Reindeer                 | 0.12% |

|     |                                   |       |
|-----|-----------------------------------|-------|
| 196 | Aves, Bird North American Song    | 0.12% |
| 197 | Aves, Bird Secretary              | 0.12% |
| 198 | Aves, Duck                        | 0.12% |
| 199 | Aves, Ibis                        | 0.12% |
| 200 | Aves, Mynah Bali                  | 0.12% |
| 201 | Aves, Turaco                      | 0.12% |
| 202 | Carnivora, Bear Black             | 0.12% |
| 203 | Carnivora, Bear Brown             | 0.12% |
| 204 | Carnivora, Fossa                  | 0.12% |
| 205 | Carnivora, Tiger Sumatran         | 0.12% |
| 206 | Cetacea, Cetacean                 | 0.12% |
| 207 | Chiroptera, Fox Flying            | 0.12% |
| 208 | Crocodylia, Alligator Chinese     | 0.12% |
| 209 | Crocodylia, Crocodile Saltwater   | 0.12% |
| 210 | Crocodylia, Gharial Malay         | 0.12% |
| 211 | Marsupialia, Macropod             | 0.12% |
| 212 | Monotremata, Echidna              | 0.12% |
| 213 | Perissodactyla, Rhinoceros Indian | 0.12% |
| 214 | Pisces, Fish Piranha              | 0.12% |
| 215 | Pisces, Sawfish                   | 0.12% |
| 216 | Primates, Monkey                  | 0.12% |
| 217 | Squamata, Gecko                   | 0.12% |
| 218 | Squamata, Python                  | 0.12% |
| 219 | Squamata, Python Reticulated      | 0.12% |
| 220 | Xenarthra, Tamandua               | 0.12% |
| 221 | Amphibia, Salamander              | 0.09% |
| 222 | Artiodactyla, Addax               | 0.09% |
| 223 | Artiodactyla, Antelope Sable      | 0.09% |
| 224 | Artiodactyla, Duiker              | 0.09% |
| 225 | Artiodactyla, Eland               | 0.09% |
| 226 | Artiodactyla, Hoofstock African   | 0.09% |
| 227 | Artiodactyla, Oryx Arabian        | 0.09% |
| 228 | Aves, Chicken Prairie             | 0.09% |
| 229 | Aves, Dove                        | 0.09% |
| 230 | Aves, Flamingo Lesser             | 0.09% |
| 231 | Aves, Geese Nene                  | 0.09% |
| 232 | Aves, Hawk                        | 0.09% |
| 233 | Aves, Hummingbird                 | 0.09% |
| 234 | Aves, Kingfisher                  | 0.09% |
| 235 | Aves, Owl Eurasian Eagle          | 0.09% |
| 236 | Aves, Penguin African             | 0.09% |
| 237 | Aves, Rheas                       | 0.09% |
| 238 | Aves, Weaver                      | 0.09% |
| 239 | Carnivora, Caracal                | 0.09% |
| 240 | Carnivora, Cat Sand               | 0.09% |
| 241 | Carnivora, Hyena Spotted          | 0.09% |
| 242 | Carnivora, Otter Sea              | 0.09% |
| 243 | Chelonia, Turtle Asian            | 0.09% |

|     |                                       |       |
|-----|---------------------------------------|-------|
| 244 | Chiroptera, Bat Fruit                 | 0.09% |
| 245 | Chiroptera, Bat Vampire               | 0.09% |
| 246 | Chondrichthyes, Shark Sand Tiger      | 0.09% |
| 247 | Chondrichthyes, Skate                 | 0.09% |
| 248 | Crocodylia, Crocodile Cuban           | 0.09% |
| 249 | Crocodylia, Crocodilian Small         | 0.09% |
| 250 | Crocodylia, Gharial                   | 0.09% |
| 251 | Hyracoidea, Hyrax                     | 0.09% |
| 252 | Hyracoidea, Hyrax Rock                | 0.09% |
| 253 | Insectivora, Hedgehog                 | 0.09% |
| 254 | Insectivora, Tenrec                   | 0.09% |
| 255 | Invertebrate, Butterfly Monarch       | 0.09% |
| 256 | Marsupialia, Devil Tasmanian          | 0.09% |
| 257 | Marsupialia, Kangaroo Red             | 0.09% |
| 258 | Marsupialia, Opossum                  | 0.09% |
| 259 | Pisces, Fish Eel                      | 0.09% |
| 260 | Pisces, Fish Eel Electric             | 0.09% |
| 261 | Pisces, Fish Lionfish                 | 0.09% |
| 262 | Pisces, Fish Pacu                     | 0.09% |
| 263 | Pisces, Fish Sea Dragon               | 0.09% |
| 264 | Primates, Guenons                     | 0.09% |
| 265 | Primates, Lemur Red Ruffed            | 0.09% |
| 266 | Primates, Monkey DeBrazza             | 0.09% |
| 267 | Primates, Monkey Squirrel             | 0.09% |
| 268 | Rodentia, Porcupine Prehensile Tailed | 0.09% |
| 269 | Rodentia, Rodent                      | 0.09% |
| 270 | Squamata, Anaconda                    | 0.09% |
| 271 | Squamata, Python Large                | 0.09% |
| 272 | Squamata, Skink Blue Tongued          | 0.09% |
| 273 | Squamata, Skink Prehensile Tailed     | 0.09% |
| 274 | Squamata, Snake Giant                 | 0.09% |
| 275 | Squamata, Snake Viper Gaboon          | 0.09% |
| 276 | Xenarthra, Sloth Two-Toed             | 0.09% |
| 277 | Amphibia, Caecilian                   | 0.06% |
| 278 | Amphibia, Frog Red Eyed Tree          | 0.06% |
| 279 | Amphibia, Frog Tomato                 | 0.06% |
| 280 | Amphibia, Salamander Giant            | 0.06% |
| 281 | Amphibia, Salamander Green            | 0.06% |
| 282 | Amphibia, Toad Blombergs              | 0.06% |
| 283 | Amphibia, Toad Puerto Rican Crested   | 0.06% |
| 284 | Amphibia, Toad, Houston               | 0.06% |
| 285 | Artiodactyla, Antelope African        | 0.06% |
| 286 | Artiodactyla, Deer Pere David         | 0.06% |
| 287 | Artiodactyla, Dik-Dik                 | 0.06% |
| 288 | Artiodactyla, Goat                    | 0.06% |
| 289 | Artiodactyla, Goat Domestic           | 0.06% |
| 290 | Artiodactyla, Goat Wild               | 0.06% |
| 291 | Artiodactyla, Hoofstock Asian         | 0.06% |

|     |                                        |       |
|-----|----------------------------------------|-------|
| 292 | Artiodactyla, Llama                    | 0.06% |
| 293 | Artiodactyla, Markhor                  | 0.06% |
| 294 | Artiodactyla, Sheep Bighorn            | 0.06% |
| 295 | Aves, Bustard Kori                     | 0.06% |
| 296 | Aves, Crane Red Crowned                | 0.06% |
| 297 | Aves, Falcon                           | 0.06% |
| 298 | Aves, Flamingo Caribbean               | 0.06% |
| 299 | Aves, Flamingo Chilean                 | 0.06% |
| 300 | Aves, Flamingo Greater                 | 0.06% |
| 301 | Aves, Heron                            | 0.06% |
| 302 | Aves, Hornbill Asian                   | 0.06% |
| 303 | Aves, Macaw Scarlet                    | 0.06% |
| 304 | Aves, Owl Great Horned                 | 0.06% |
| 305 | Aves, Owl Snowy                        | 0.06% |
| 306 | Aves, Pheasant Edwards                 | 0.06% |
| 307 | Aves, Pigeon                           | 0.06% |
| 308 | Aves, Pigeon Nicobar                   | 0.06% |
| 309 | Aves, Stork European White             | 0.06% |
| 310 | Aves, Toucan Toco                      | 0.06% |
| 311 | Aves, Turaco Violaceous                | 0.06% |
| 312 | Aves, Vulture Old World                | 0.06% |
| 313 | Carnivora, Badger                      | 0.06% |
| 314 | Carnivora, Badger Honey                | 0.06% |
| 315 | Carnivora, Cat Fishing                 | 0.06% |
| 316 | Carnivora, Cat Pallas                  | 0.06% |
| 317 | Carnivora, Coyote                      | 0.06% |
| 318 | Carnivora, Dog Domestic                | 0.06% |
| 319 | Carnivora, Fox Bat Eared               | 0.06% |
| 320 | Carnivora, Fox Fennec                  | 0.06% |
| 321 | Carnivora, Fox Swift                   | 0.06% |
| 322 | Carnivora, Lynx                        | 0.06% |
| 323 | Carnivora, Mongoose                    | 0.06% |
| 324 | Carnivora, Seal Harbor                 | 0.06% |
| 325 | Carnivora, Wolf Ethiopian              | 0.06% |
| 326 | Cetacea, Whale Killer                  | 0.06% |
| 327 | Chelonia, Turtle Alligator Snapping    | 0.06% |
| 328 | Chelonia, Turtle Box                   | 0.06% |
| 329 | Chelonia, Turtle Green Sea             | 0.06% |
| 330 | Chondrichthyes, Shark Epaulette        | 0.06% |
| 331 | Chondrichthyes, Shark Sandbar          | 0.06% |
| 332 | Chondrichthyes, Stingray Freshwater    | 0.06% |
| 333 | Crocodylia, Crocodilian Large          | 0.06% |
| 334 | Insectivora, Insectivore               | 0.06% |
| 335 | Invertebrate, Butterfly Morpho         | 0.06% |
| 336 | Invertebrate, Butterfly North American | 0.06% |
| 337 | Invertebrate, Jellyfish Moon           | 0.06% |
| 338 | Invertebrate, Spider Goliath Birdeater | 0.06% |
| 339 | Marsupialia, Wallaby                   | 0.06% |

|     |                                     |       |
|-----|-------------------------------------|-------|
| 340 | Marsupialia, Wombat                 | 0.06% |
| 341 | Perissodactyla, Ass Somali Wild     | 0.06% |
| 342 | Perissodactyla, Tapir Brazilian     | 0.06% |
| 343 | Perissodactyla, Tapir Mountain      | 0.06% |
| 344 | Pisces, Fish Cat                    | 0.06% |
| 345 | Pisces, Fish Cichlid African        | 0.06% |
| 346 | Pisces, Fish Mudskipper             | 0.06% |
| 347 | Pisces, Fish Parrot                 | 0.06% |
| 348 | Pisces, Fish Sturgeon Lake          | 0.06% |
| 349 | Pisces, Paddlefish                  | 0.06% |
| 350 | Primates, Gibbon White Cheeked      | 0.06% |
| 351 | Primates, Gorilla Western Lowland   | 0.06% |
| 352 | Primates, Hamadryas                 | 0.06% |
| 353 | Primates, Lemur Mongoose            | 0.06% |
| 354 | Primates, Lemur Sifaka              | 0.06% |
| 355 | Primates, Loris Slow                | 0.06% |
| 356 | Primates, Macaque Japanese          | 0.06% |
| 357 | Primates, Prosimians                | 0.06% |
| 358 | Primates, Tamarin Emperor           | 0.06% |
| 359 | Reptilia, Reptile Large             | 0.06% |
| 360 | Rodentia, Dog Prairie               | 0.06% |
| 361 | Rodentia, Squirrel Prevost          | 0.06% |
| 362 | Sirenia, Dugong                     | 0.06% |
| 363 | Squamata, Boa Emerald Tree          | 0.06% |
| 364 | Squamata, Iguana Cyclurid           | 0.06% |
| 365 | Squamata, Lizard Beaded             | 0.06% |
| 366 | Squamata, Lizard Monitor            | 0.06% |
| 367 | Squamata, Lizard Monitor Green Tree | 0.06% |
| 368 | Squamata, Python Burmese            | 0.06% |
| 369 | Squamata, Skink                     | 0.06% |
| 370 | Squamata, Snake Colubrid            | 0.06% |
| 371 | Squamata, Snake Diamond Back Rattle | 0.06% |
| 372 | Squamata, Snake Indigo              | 0.06% |
| 373 | Squamata, Snake Large Constrictor   | 0.06% |
| 374 | Squamata, Snake Viper Old World     | 0.06% |
| 375 | Amphibia, Amphiuma                  | 0.03% |
| 376 | Amphibia, Bullfrog American         | 0.03% |
| 377 | Amphibia, Frog Carolina Gopher      | 0.03% |
| 378 | Amphibia, Frog Clawed               | 0.03% |
| 379 | Amphibia, Frog Glass                | 0.03% |
| 380 | Amphibia, Frog Goliath              | 0.03% |
| 381 | Amphibia, Frog Lake Titicaca        | 0.03% |
| 382 | Amphibia, Frog Ornate Tree          | 0.03% |
| 383 | Amphibia, Frog Painted              | 0.03% |
| 384 | Amphibia, Frog Panamanian Golden    | 0.03% |
| 385 | Amphibia, Frog Rainforest           | 0.03% |
| 386 | Amphibia, Frog Smokey Jungle        | 0.03% |
| 387 | Amphibia, Frog Spiny Headed Tree    | 0.03% |

|     |                                    |       |
|-----|------------------------------------|-------|
| 388 | Amphibia, Frog Tropical            | 0.03% |
| 389 | Amphibia, Frog Vietnamese Mossy    | 0.03% |
| 390 | Amphibia, Hellbender Eastern       | 0.03% |
| 391 | Amphibia, Hellbender Ozark         | 0.03% |
| 392 | Amphibia, Salamander Aquatic Siren | 0.03% |
| 393 | Amphibia, Salamander Brook         | 0.03% |
| 394 | Amphibia, Salamander Plethodon     | 0.03% |
| 395 | Amphibia, Toad Cane                | 0.03% |
| 396 | Amphibia, Toad Congolese Giant     | 0.03% |
| 397 | Artiodactyla, Alpaca               | 0.03% |
| 398 | Artiodactyla, Anoa                 | 0.03% |
| 399 | Artiodactyla, Banteng              | 0.03% |
| 400 | Artiodactyla, Blackbuck            | 0.03% |
| 401 | Artiodactyla, Blesbok              | 0.03% |
| 402 | Artiodactyla, Bontebok             | 0.03% |
| 403 | Artiodactyla, Buffalo Water        | 0.03% |
| 404 | Artiodactyla, Caribou              | 0.03% |
| 405 | Artiodactyla, Cow Domestic         | 0.03% |
| 406 | Artiodactyla, Deer Asian           | 0.03% |
| 407 | Artiodactyla, Deer Brocket         | 0.03% |
| 408 | Artiodactyla, Deer Elk             | 0.03% |
| 409 | Artiodactyla, Deer Muntjac         | 0.03% |
| 410 | Artiodactyla, Deer Musk            | 0.03% |
| 411 | Artiodactyla, Deer Pudu            | 0.03% |
| 412 | Artiodactyla, Deer Swamp           | 0.03% |
| 413 | Artiodactyla, Deer Tufted          | 0.03% |
| 414 | Artiodactyla, Dik-Dik Kirks        | 0.03% |
| 415 | Artiodactyla, Duiker Jentink's     | 0.03% |
| 416 | Artiodactyla, Duiker Yellow-Backed | 0.03% |
| 417 | Artiodactyla, Eland Giant          | 0.03% |
| 418 | Artiodactyla, Eland Lesser/Common  | 0.03% |
| 419 | Artiodactyla, Gaur                 | 0.03% |
| 420 | Artiodactyla, Gazelle African      | 0.03% |
| 421 | Artiodactyla, Gazelle Dama         | 0.03% |
| 422 | Artiodactyla, Gazelle Grants       | 0.03% |
| 423 | Artiodactyla, Gemsbok              | 0.03% |
| 424 | Artiodactyla, Giraffe Masai        | 0.03% |
| 425 | Artiodactyla, Giraffe Reticulated  | 0.03% |
| 426 | Artiodactyla, Ibex                 | 0.03% |
| 427 | Artiodactyla, Ibex Nubian          | 0.03% |
| 428 | Artiodactyla, Klipspringer         | 0.03% |
| 429 | Artiodactyla, Kudu Lesser          | 0.03% |
| 430 | Artiodactyla, Nyala                | 0.03% |
| 431 | Artiodactyla, Ox Musk              | 0.03% |
| 432 | Artiodactyla, Peccary Chacoan      | 0.03% |
| 433 | Artiodactyla, Peccary Collared     | 0.03% |
| 434 | Artiodactyla, Pig Asian            | 0.03% |
| 435 | Artiodactyla, Pig Bearded          | 0.03% |

|     |                                    |       |
|-----|------------------------------------|-------|
| 436 | Artiodactyla, Pig Exotic           | 0.03% |
| 437 | Artiodactyla, Pig Visayan Warty    | 0.03% |
| 438 | Artiodactyla, Pronghorn Peninsular | 0.03% |
| 439 | Artiodactyla, Sheep Domestic       | 0.03% |
| 440 | Artiodactyla, Sheep Wild           | 0.03% |
| 441 | Artiodactyla, Takin Sichuan        | 0.03% |
| 442 | Aves, Albatross                    | 0.03% |
| 443 | Aves, Aracari                      | 0.03% |
| 444 | Aves, Aracari Curl Crested         | 0.03% |
| 445 | Aves, Barbet                       | 0.03% |
| 446 | Aves, Bee Eater                    | 0.03% |
| 447 | Aves, Bird Amazon Cuban            | 0.03% |
| 448 | Aves, Bird Endangered              | 0.03% |
| 449 | Aves, Bird Exotic                  | 0.03% |
| 450 | Aves, Bird Migratory               | 0.03% |
| 451 | Aves, Bird Sun                     | 0.03% |
| 452 | Aves, Birds Large                  | 0.03% |
| 453 | Aves, Bluebird Fairy               | 0.03% |
| 454 | Aves, Cockatoo                     | 0.03% |
| 455 | Aves, Cockatoo Great Palm          | 0.03% |
| 456 | Aves, Cockatoo Leadbeater          | 0.03% |
| 457 | Aves, Cock-of-the-Rock             | 0.03% |
| 458 | Aves, Cormorant                    | 0.03% |
| 459 | Aves, Corvids                      | 0.03% |
| 460 | Aves, Cracidae                     | 0.03% |
| 461 | Aves, Crane Asian                  | 0.03% |
| 462 | Aves, Crane Sarus                  | 0.03% |
| 463 | Aves, Crane Wattled                | 0.03% |
| 464 | Aves, Crane White Naped            | 0.03% |
| 465 | Aves, Crow                         | 0.03% |
| 466 | Aves, Cuckoos                      | 0.03% |
| 467 | Aves, Curassow                     | 0.03% |
| 468 | Aves, Dove Bleeding Heart          | 0.03% |
| 469 | Aves, Eagle Golden                 | 0.03% |
| 470 | Aves, Eagle Harpy                  | 0.03% |
| 471 | Aves, Egret                        | 0.03% |
| 472 | Aves, Fowl Guinea                  | 0.03% |
| 473 | Aves, Fowl Guinea Vulturine        | 0.03% |
| 474 | Aves, Geese                        | 0.03% |
| 475 | Aves, Hammerkop                    | 0.03% |
| 476 | Aves, Hornbill Abyssinian Ground   | 0.03% |
| 477 | Aves, Hornbill Great Indian        | 0.03% |
| 478 | Aves, Hornbill Red Bill            | 0.03% |
| 479 | Aves, Hornbill Rhinoceros          | 0.03% |
| 480 | Aves, Hornbill Wreathed            | 0.03% |
| 481 | Aves, Hornbill Yellow Bill         | 0.03% |
| 482 | Aves, Jays                         | 0.03% |
| 483 | Aves, Kea                          | 0.03% |

|     |                                    |       |
|-----|------------------------------------|-------|
| 484 | Aves, Kingfisher Guam              | 0.03% |
| 485 | Aves, Lapwing Spur Winged          | 0.03% |
| 486 | Aves, Macaw Blue                   | 0.03% |
| 487 | Aves, Macaw Blue and Yellow        | 0.03% |
| 488 | Aves, Macaw Great Green            | 0.03% |
| 489 | Aves, Magpie                       | 0.03% |
| 490 | Aves, Motmot                       | 0.03% |
| 491 | Aves, Motmot, Blue Crowned         | 0.03% |
| 492 | Aves, Ostrich Masai                | 0.03% |
| 493 | Aves, Owl Burrowing                | 0.03% |
| 494 | Aves, Owl Pygmy                    | 0.03% |
| 495 | Aves, Owl Screech                  | 0.03% |
| 496 | Aves, Owl Tawny                    | 0.03% |
| 497 | Aves, Parrot Kakapo                | 0.03% |
| 498 | Aves, Parrot Maroon Fronted        | 0.03% |
| 499 | Aves, Parrot St. Vincents          | 0.03% |
| 500 | Aves, Parrot Yellow Headed         | 0.03% |
| 501 | Aves, Partridge Crested Wood       | 0.03% |
| 502 | Aves, Peafowl                      | 0.03% |
| 503 | Aves, Peafowl Congo                | 0.03% |
| 504 | Aves, Penguin King                 | 0.03% |
| 505 | Aves, Penguin Temperate            | 0.03% |
| 506 | Aves, Pheasant Argus               | 0.03% |
| 507 | Aves, Pigeon Victoria Crowned      | 0.03% |
| 508 | Aves, Puffin Tufted                | 0.03% |
| 509 | Aves, Quail                        | 0.03% |
| 510 | Aves, Quetzal Resplendent          | 0.03% |
| 511 | Aves, Raptor North American        | 0.03% |
| 512 | Aves, Screamer                     | 0.03% |
| 513 | Aves, Screamer Horned              | 0.03% |
| 514 | Aves, Shrike                       | 0.03% |
| 515 | Aves, Starling                     | 0.03% |
| 516 | Aves, Starling Superb              | 0.03% |
| 517 | Aves, Stork Saddle Billed          | 0.03% |
| 518 | Aves, Swan Trumpeter               | 0.03% |
| 519 | Aves, Tanager Blue Grey            | 0.03% |
| 520 | Aves, Tern Inca                    | 0.03% |
| 521 | Aves, Thrush Blue Crowned Laughing | 0.03% |
| 522 | Aves, Toucan Keel Billed           | 0.03% |
| 523 | Aves, Troupial                     | 0.03% |
| 524 | Aves, Turaco Lady Ross             | 0.03% |
| 525 | Aves, Turaco White Cheek           | 0.03% |
| 526 | Aves, Turkey                       | 0.03% |
| 527 | Aves, Vulture Cinereous            | 0.03% |
| 528 | Aves, Vulture Lappet Faced         | 0.03% |
| 529 | Aves, Vulture Large                | 0.03% |
| 530 | Aves, Vulture New World            | 0.03% |
| 531 | Aves, Vulture White Backed         | 0.03% |

|     |                                      |       |
|-----|--------------------------------------|-------|
| 532 | Aves, Waterfowl African              | 0.03% |
| 533 | Aves, Waterfowl North American       | 0.03% |
| 534 | Carnivora, Bear American             | 0.03% |
| 535 | Carnivora, Bear Asian                | 0.03% |
| 536 | Carnivora, Canid Small               | 0.03% |
| 537 | Carnivora, Cat Black-Footed          | 0.03% |
| 538 | Carnivora, Cat Small North American  | 0.03% |
| 539 | Carnivora, Coati                     | 0.03% |
| 540 | Carnivora, Dhole                     | 0.03% |
| 541 | Carnivora, Dingo                     | 0.03% |
| 542 | Carnivora, Fisher                    | 0.03% |
| 543 | Carnivora, Fox Darwin                | 0.03% |
| 544 | Carnivora, Fox Island                | 0.03% |
| 545 | Carnivora, Kinkajou                  | 0.03% |
| 546 | Carnivora, Margay                    | 0.03% |
| 547 | Carnivora, Mink                      | 0.03% |
| 548 | Carnivora, Olinguito                 | 0.03% |
| 549 | Carnivora, Otter Asian               | 0.03% |
| 550 | Carnivora, Otter Marine (not Sea)    | 0.03% |
| 551 | Carnivora, Otter Small Clawed        | 0.03% |
| 552 | Carnivora, Otter, Neotropical River  | 0.03% |
| 553 | Carnivora, Pandas                    | 0.03% |
| 554 | Carnivora, Raccoon                   | 0.03% |
| 555 | Carnivora, Sea Lion Steller          | 0.03% |
| 556 | Carnivora, Seal Hawaiian Monk        | 0.03% |
| 557 | Carnivora, Skunk                     | 0.03% |
| 558 | Carnivora, Small                     | 0.03% |
| 559 | Carnivora, Tiger Bengal              | 0.03% |
| 560 | Carnivora, Tiger Indochinese         | 0.03% |
| 561 | Carnivora, Tiger Malayan             | 0.03% |
| 562 | Carnivora, Weasel                    | 0.03% |
| 563 | Cetacea, Dolphin Bottlenose          | 0.03% |
| 564 | Cetacea, Vaquita                     | 0.03% |
| 565 | Chelonia, Tortoise Burmese Star      | 0.03% |
| 566 | Chelonia, Tortoise Endangered        | 0.03% |
| 567 | Chelonia, Tortoise Geometric         | 0.03% |
| 568 | Chelonia, Tortoise Ploughshare       | 0.03% |
| 569 | Chelonia, Tortoise Small             | 0.03% |
| 570 | Chelonia, Tortoise Spider            | 0.03% |
| 571 | Chelonia, Turtle Box Coahuilan       | 0.03% |
| 572 | Chelonia, Turtle Box Eastern         | 0.03% |
| 573 | Chelonia, Turtle Box Indochinese     | 0.03% |
| 574 | Chelonia, Turtle Box Mexican         | 0.03% |
| 575 | Chelonia, Turtle Box Pan's           | 0.03% |
| 576 | Chelonia, Turtle Endangered          | 0.03% |
| 577 | Chelonia, Turtle Malaysian Giant     | 0.03% |
| 578 | Chelonia, Turtle Mata Mata           | 0.03% |
| 579 | Chelonia, Turtle North American Wood | 0.03% |

|     |                                                 |       |
|-----|-------------------------------------------------|-------|
| 580 | Chelonia, Turtle Side Neck                      | 0.03% |
| 581 | Chelonia, Turtle Slider                         | 0.03% |
| 582 | Chelonia, Turtle Spotted                        | 0.03% |
| 583 | Chiroptera, Bat Fruit Balmers                   | 0.03% |
| 584 | Chiroptera, Bat Fruit Rodrigues                 | 0.03% |
| 585 | Chiroptera, Bat North American Endangered       | 0.03% |
| 586 | Chiroptera, Fox Indian Flying                   | 0.03% |
| 587 | Chiroptera, Microbat Leaf Nose                  | 0.03% |
| 588 | Chondrichthyes, Guitarfish Bowmouth             | 0.03% |
| 589 | Chondrichthyes, Ray Cownose                     | 0.03% |
| 590 | Chondrichthyes, Ray Freshwater                  | 0.03% |
| 591 | Chondrichthyes, Ray Large                       | 0.03% |
| 592 | Chondrichthyes, Ray Manta                       | 0.03% |
| 593 | Chondrichthyes, Shark Bamboo                    | 0.03% |
| 594 | Chondrichthyes, Shark Blacktip Reef             | 0.03% |
| 595 | Chondrichthyes, Shark Galapagos                 | 0.03% |
| 596 | Chondrichthyes, Shark Grey Reef                 | 0.03% |
| 597 | Chondrichthyes, Shark Hammerhead                | 0.03% |
| 598 | Chondrichthyes, Shark Leopard                   | 0.03% |
| 599 | Chondrichthyes, Shark Reef                      | 0.03% |
| 600 | Chondrichthyes, Shark Whale                     | 0.03% |
| 601 | Chondrichthyes, Shark Whitetip Reef             | 0.03% |
| 602 | Chondrichthyes, Shark Zebra                     | 0.03% |
| 603 | Crocodylia, Caiman                              | 0.03% |
| 604 | Crocodylia, Caiman Black                        | 0.03% |
| 605 | Crocodylia, Crocodile Nile                      | 0.03% |
| 606 | Crocodylia, Crocodile Orinoco                   | 0.03% |
| 607 | Crocodylia, Crocodile Slender Snout             | 0.03% |
| 608 | Insectivora, Shrew Elephant                     | 0.03% |
| 609 | Invertebrate, Bee Honey                         | 0.03% |
| 610 | Invertebrate, Butterfly Metalmark Lange's       | 0.03% |
| 611 | Invertebrate, Butterfly Palo Verdes Blue        | 0.03% |
| 612 | Invertebrate, Butterfly Skipper Laguna Mountain | 0.03% |
| 613 | Invertebrate, Cephalopods                       | 0.03% |
| 614 | Invertebrate, Cockroach                         | 0.03% |
| 615 | Invertebrate, Cuttlefish Spectacular            | 0.03% |
| 616 | Invertebrate, Earthworm                         | 0.03% |
| 617 | Invertebrate, Jellyfish Sea Nettle              | 0.03% |
| 618 | Invertebrate, Ladybug                           | 0.03% |
| 619 | Invertebrate, Lobster                           | 0.03% |
| 620 | Invertebrate, Nautilus Chambered                | 0.03% |
| 621 | Invertebrate, Oyster                            | 0.03% |
| 622 | Invertebrate, Scorpion Emperor                  | 0.03% |
| 623 | Invertebrate, Shrimp Mantis                     | 0.03% |
| 624 | Invertebrate, Spider Large                      | 0.03% |
| 625 | Invertebrate, Spider Orb Weaving                | 0.03% |
| 626 | Invertebrate, Spider Sea                        | 0.03% |
| 627 | Invertebrate, Tarantula Red Knee                | 0.03% |

|     |                                     |       |
|-----|-------------------------------------|-------|
| 628 | Marsupialia, Marsupial              | 0.03% |
| 629 | Marsupialia, Marsupial Australian   | 0.03% |
| 630 | Marsupialia, Marsupial Endangered   | 0.03% |
| 631 | Marsupialia, Wallaby Red-Necked     | 0.03% |
| 632 | Perissodactyla, Ass Wild            | 0.03% |
| 633 | Perissodactyla, Horse               | 0.03% |
| 634 | Perissodactyla, Onager              | 0.03% |
| 635 | Perissodactyla, Rhinoceros Javan    | 0.03% |
| 636 | Perissodactyla, Rhinoceros Sumatran | 0.03% |
| 637 | Perissodactyla, Zebra Grevy's       | 0.03% |
| 638 | Pisces, Arapaima                    | 0.03% |
| 639 | Pisces, Arrowana                    | 0.03% |
| 640 | Pisces, Arrowana Asian              | 0.03% |
| 641 | Pisces, Bowfins                     | 0.03% |
| 642 | Pisces, Catfish Redtail             | 0.03% |
| 643 | Pisces, Chromis Blue                | 0.03% |
| 644 | Pisces, Cowfish Longhorn            | 0.03% |
| 645 | Pisces, Fish Bass                   | 0.03% |
| 646 | Pisces, Fish Blue Tang              | 0.03% |
| 647 | Pisces, Fish Bonytongue             | 0.03% |
| 648 | Pisces, Fish Clown                  | 0.03% |
| 649 | Pisces, Fish Clown Trigger          | 0.03% |
| 650 | Pisces, Fish Cod Potato             | 0.03% |
| 651 | Pisces, Fish Eel Garden             | 0.03% |
| 652 | Pisces, Fish Lungfish               | 0.03% |
| 653 | Pisces, Fish Puffer Porcupine       | 0.03% |
| 654 | Pisces, Fish Salmon                 | 0.03% |
| 655 | Pisces, Fish Sturgeon Atlantic      | 0.03% |
| 656 | Pisces, Gar Alligator               | 0.03% |
| 657 | Pisces, Gar Longnose                | 0.03% |
| 658 | Pisces, Menhaden                    | 0.03% |
| 659 | Pisces, Piranha Red Bellied         | 0.03% |
| 660 | Pisces, Tarpon                      | 0.03% |
| 661 | Pisces, Trigger Queen               | 0.03% |
| 662 | Primates, Ape Lesser                | 0.03% |
| 663 | Primates, Baby Bush                 | 0.03% |
| 664 | Primates, Capuchin                  | 0.03% |
| 665 | Primates, Drill                     | 0.03% |
| 666 | Primates, Gelada                    | 0.03% |
| 667 | Primates, Gibbon White Handed       | 0.03% |
| 668 | Primates, Gorilla Mountain          | 0.03% |
| 669 | Primates, Langur                    | 0.03% |
| 670 | Primates, Langur Francois           | 0.03% |
| 671 | Primates, Large                     | 0.03% |
| 672 | Primates, Lemur Blue Eyed Black     | 0.03% |
| 673 | Primates, Lemur Collared Brown      | 0.03% |
| 674 | Primates, Lemur Crowned             | 0.03% |
| 675 | Primates, Lemur Indri               | 0.03% |

|     |                                     |       |
|-----|-------------------------------------|-------|
| 676 | Primates, Lemur Mouse               | 0.03% |
| 677 | Primates, Lesser                    | 0.03% |
| 678 | Primates, Macaque                   | 0.03% |
| 679 | Primates, Mangabeys                 | 0.03% |
| 680 | Primates, Marmoset Pygmy            | 0.03% |
| 681 | Primates, Monkey African            | 0.03% |
| 682 | Primates, Monkey Allen's Swamp      | 0.03% |
| 683 | Primates, Monkey Asian              | 0.03% |
| 684 | Primates, Monkey Golden             | 0.03% |
| 685 | Primates, Monkey Owl                | 0.03% |
| 686 | Primates, Monkey Prehensile Tail    | 0.03% |
| 687 | Primates, Monkey Rainforest         | 0.03% |
| 688 | Primates, Monkey Saki               | 0.03% |
| 689 | Primates, Primate Asian             | 0.03% |
| 690 | Primates, Primate Rainforest        | 0.03% |
| 691 | Primates, Small/Medium Attractive   | 0.03% |
| 692 | Primates, Tarsier                   | 0.03% |
| 693 | Reptilia, Reptile and Amphibians    | 0.03% |
| 694 | Reptilia, Reptile Asian             | 0.03% |
| 695 | Reptilia, Reptile Malagasy          | 0.03% |
| 696 | Reptilia, Reptile Unique            | 0.03% |
| 697 | Rhynchocephalia, Tuatara            | 0.03% |
| 698 | Rodentia, Chinchilla                | 0.03% |
| 699 | Rodentia, Mice                      | 0.03% |
| 700 | Rodentia, Nutria                    | 0.03% |
| 701 | Rodentia, Pig Guinea                | 0.03% |
| 702 | Rodentia, Porcupine African Crested | 0.03% |
| 703 | Rodentia, Porcupine Coendu          | 0.03% |
| 704 | Rodentia, Porcupine Crested         | 0.03% |
| 705 | Rodentia, Rat Malagasy Giant        | 0.03% |
| 706 | Rodentia, Rat Pack                  | 0.03% |
| 707 | Rodentia, Squirrel                  | 0.03% |
| 708 | Rodentia, Squirrel Flying           | 0.03% |
| 709 | Rodentia, Squirrel Fox              | 0.03% |
| 710 | Squamata, Anaconda Green            | 0.03% |
| 711 | Squamata, Gecko Day                 | 0.03% |
| 712 | Squamata, Gecko Henckel Leaf Tailed | 0.03% |
| 713 | Squamata, Gecko Leaf Tailed         | 0.03% |
| 714 | Squamata, Iguana Caribbean          | 0.03% |
| 715 | Squamata, Iguana Grand Cayman Blue  | 0.03% |
| 716 | Squamata, Iguana Spiny Tailed       | 0.03% |
| 717 | Squamata, Lizard Agama              | 0.03% |
| 718 | Squamata, Lizard Australian         | 0.03% |
| 719 | Squamata, Lizard Chuckwalla         | 0.03% |
| 720 | Squamata, Lizard Colorful           | 0.03% |
| 721 | Squamata, Lizard Cordylid           | 0.03% |
| 722 | Squamata, Lizard Crocodile          | 0.03% |
| 723 | Squamata, Lizard Desert             | 0.03% |

|     |                                             |       |
|-----|---------------------------------------------|-------|
| 724 | Squamata, Lizard Endangered                 | 0.03% |
| 725 | Squamata, Lizard Glass                      | 0.03% |
| 726 | Squamata, Lizard Horned                     | 0.03% |
| 727 | Squamata, Lizard South American             | 0.03% |
| 728 | Squamata, Mamba                             | 0.03% |
| 729 | Squamata, Python Green Tree                 | 0.03% |
| 730 | Squamata, Rattlesnake Aruba Island          | 0.03% |
| 731 | Squamata, Rattlesnake Eastern Massasauga    | 0.03% |
| 732 | Squamata, Snake Colorful                    | 0.03% |
| 733 | Squamata, Snake Diamond Back Eastern Rattle | 0.03% |
| 734 | Squamata, Snake Endangered                  | 0.03% |
| 735 | Squamata, Snake King                        | 0.03% |
| 736 | Squamata, Snake Louisiana Pine              | 0.03% |
| 737 | Squamata, Snake Rat                         | 0.03% |
| 738 | Squamata, Snake Tiger Rat                   | 0.03% |
| 739 | Squamata, Snake Viper New World             | 0.03% |
| 740 | Squamata, Toad Horny                        | 0.03% |
| 741 | Xenarthra, Armadillo Three-Banded           | 0.03% |
| 742 | Xenarthra, Sloth Hoffmann's Two-Toed        | 0.03% |

| All Surveys Combined (n=42,866 votes cast) |                            |         |
|--------------------------------------------|----------------------------|---------|
| Rank                                       | Animal Name                | % Votes |
| 1                                          | Carnivora, Tiger           | 2.99%   |
| 2                                          | Carnivora, Lion            | 2.80%   |
| 3                                          | Proboscidea, Elephant      | 2.64%   |
| 4                                          | Artiodactyla, Giraffe      | 2.64%   |
| 5                                          | Perissodactyla, Rhinoceros | 1.96%   |
| 6                                          | Carnivora, Bear Polar      | 1.59%   |
| 7                                          | Perissodactyla, Zebra      | 1.56%   |
| 8                                          | Primates, Gorilla          | 1.54%   |
| 9                                          | Carnivora, Bear            | 1.43%   |
| 10                                         | Primates, Monkey           | 1.42%   |
| 11                                         | Chondrichthyes, Shark      | 1.29%   |
| 12                                         | Artiodactyla, Hippopotamus | 1.13%   |
| 13                                         | Carnivora, Panda Giant     | 1.08%   |
| 14                                         | Aves, Penguin              | 0.99%   |
| 15                                         | Primates, Orangutan        | 0.98%   |
| 16                                         | Cetacea, Dolphin           | 0.95%   |
| 17                                         | Carnivora, Cheetah         | 0.83%   |
| 18                                         | Invertebrate, Coral        | 0.83%   |
| 19                                         | Primates, Lemur            | 0.78%   |
| 20                                         | Marsupialia, Koala         | 0.77%   |
| 21                                         | Carnivora, Panda Red       | 0.76%   |
| 22                                         | Squamata, Snake            | 0.75%   |
| 23                                         | Aves, Bird                 | 0.71%   |
| 24                                         | Primates, Chimpanzee       | 0.70%   |

|    |                               |       |
|----|-------------------------------|-------|
| 25 | Cetacea, Whale                | 0.70% |
| 26 | Aves, Eagle Bald              | 0.70% |
| 27 | Crocodylia, Crocodile         | 0.66% |
| 28 | Crocodylia, Alligator         | 0.66% |
| 29 | Carnivora, Leopard Snow       | 0.66% |
| 30 | Xenarthra, Sloth              | 0.66% |
| 31 | Aves, Flamingo                | 0.64% |
| 32 | Carnivora, Leopard            | 0.64% |
| 33 | Invertebrate, Butterfly       | 0.63% |
| 34 | Chelonia, Turtle              | 0.61% |
| 35 | Chelonia, Turtle Sea          | 0.61% |
| 36 | Carnivora, Jaguar             | 0.59% |
| 37 | Aves, Pelican                 | 0.58% |
| 38 | Carnivora, Seal               | 0.58% |
| 39 | Carnivora, Otter              | 0.57% |
| 40 | Marsupialia, Kangaroo         | 0.57% |
| 41 | Pisces, Fish                  | 0.56% |
| 42 | Carnivora, Sea Lion           | 0.55% |
| 43 | Carnivora, Dog African Wild   | 0.53% |
| 44 | Artiodactyla, Okapi           | 0.52% |
| 45 | Carnivora, Puma               | 0.49% |
| 46 | Artiodactyla, Bison           | 0.49% |
| 47 | Invertebrate, Octopus         | 0.49% |
| 48 | Xenarthra, Anteater           | 0.46% |
| 49 | Aves, Parrot                  | 0.45% |
| 50 | Squamata, Dragon Komodo       | 0.45% |
| 51 | Sirenia, Manatee              | 0.45% |
| 52 | Xenarthra, Pangolin           | 0.44% |
| 53 | Invertebrate, Jellyfish       | 0.43% |
| 54 | Perissodactyla, Tapir         | 0.42% |
| 55 | Amphibia, Frog                | 0.41% |
| 56 | Aves, Ostrich                 | 0.41% |
| 57 | Carnivora, Hyena              | 0.38% |
| 58 | Aves, Vulture                 | 0.37% |
| 59 | Carnivora, Meerkat            | 0.36% |
| 60 | Aves, Owl                     | 0.36% |
| 61 | Carnivora, Wolf Gray          | 0.36% |
| 62 | Primates, Ape                 | 0.35% |
| 63 | Primates, Gibbon              | 0.35% |
| 64 | Carnivora, Cat Big            | 0.35% |
| 65 | Artiodactyla, Camel           | 0.34% |
| 66 | Chelonia, Tortoise            | 0.34% |
| 67 | Proboscidea, Elephant African | 0.33% |
| 68 | Pisces, Fish Seahorse         | 0.33% |
| 69 | Carnivora, Wolf               | 0.32% |
| 70 | Amphibia, Amphibian           | 0.32% |
| 71 | Artiodactyla, Deer            | 0.32% |
| 72 | Proboscidea, Elephant Asian   | 0.32% |

|     |                                  |       |
|-----|----------------------------------|-------|
| 73  | Carnivora, Walrus                | 0.31% |
| 74  | Aves, Hornbill                   | 0.30% |
| 75  | Artiodactyla, Bongo              | 0.29% |
| 76  | Aves, Crane                      | 0.29% |
| 77  | Carnivora, Bear Grizzly          | 0.29% |
| 78  | Squamata, Lizard                 | 0.29% |
| 79  | Aves, Toucan                     | 0.29% |
| 80  | Invertebrate, Bee                | 0.28% |
| 81  | Perissodactyla, Rhinoceros Black | 0.28% |
| 82  | Perissodactyla, Rhinoceros White | 0.28% |
| 83  | Carnivora, Cat                   | 0.28% |
| 84  | Primates, Ape Great              | 0.28% |
| 85  | Carnivora, Dog Domestic          | 0.28% |
| 86  | Artiodactyla, Antelope           | 0.27% |
| 87  | Chelonia, Tortoise Galapagos     | 0.27% |
| 88  | Invertebrate, Insect             | 0.27% |
| 89  | Aves, Macaw                      | 0.27% |
| 90  | Perissodactyla, Horse            | 0.27% |
| 91  | Chondrichthyes, Stingray         | 0.27% |
| 92  | Carnivora, Bear Black            | 0.26% |
| 93  | Chiroptera, Bat                  | 0.26% |
| 94  | Primates, Bonobo                 | 0.26% |
| 95  | Carnivora, Otter Sea             | 0.26% |
| 96  | Carnivora, Fox                   | 0.25% |
| 97  | Amphibia, Frog Poison Dart       | 0.25% |
| 98  | Carnivora, Leopard Amur          | 0.25% |
| 99  | Pisces, Fish Coral Reef          | 0.25% |
| 100 | Rodentia, Capybara               | 0.25% |
| 101 | Cetacea, Whale Killer            | 0.24% |
| 102 | Reptilia, Reptile                | 0.24% |
| 103 | Monotremata, Platypus            | 0.24% |
| 104 | Artiodactyla, Warthog            | 0.23% |
| 105 | Carnivora, Otter River           | 0.22% |
| 106 | Primates, Tamarin                | 0.22% |
| 107 | Artiodactyla, Gazelle            | 0.21% |
| 108 | Carnivora, Leopard Clouded       | 0.21% |
| 109 | Chondrichthyes, Ray              | 0.21% |
| 110 | Aves, Bird Rainforest            | 0.21% |
| 111 | Carnivora, Ferret Black Footed   | 0.21% |
| 112 | Carnivora, Wolf Maned            | 0.21% |
| 113 | Aves, Ratite Cassowary           | 0.20% |
| 114 | Carnivora, Bear Sun              | 0.20% |
| 115 | Carnivora, Panda                 | 0.20% |
| 116 | Invertebrate, Butterfly Monarch  | 0.20% |
| 117 | Carnivora, Bear Sloth            | 0.20% |
| 118 | Artiodactyla, Goat               | 0.19% |
| 119 | Carnivora, Tiger Amur            | 0.19% |
| 120 | Cetacea, Whale Beluga            | 0.19% |

|     |                                       |       |
|-----|---------------------------------------|-------|
| 121 | Aves, Condor                          | 0.19% |
| 122 | Carnivora, Bear Brown                 | 0.19% |
| 123 | Carnivora, Wolf Red                   | 0.19% |
| 124 | Marsupialia, Devil Tasmanian          | 0.19% |
| 125 | Artiodactyla, Pig                     | 0.19% |
| 126 | Carnivora, Fossa                      | 0.19% |
| 127 | Rodentia, Beaver                      | 0.19% |
| 128 | Aves, Hawk                            | 0.18% |
| 129 | Aves, Raptor                          | 0.18% |
| 130 | Carnivora, Binturong                  | 0.18% |
| 131 | Invertebrate, Starfish                | 0.18% |
| 132 | Rodentia, Porcupine                   | 0.18% |
| 133 | Squamata, Rattlesnake                 | 0.18% |
| 134 | Pisces, Fish Freshwater               | 0.18% |
| 135 | Aves, Condor California               | 0.18% |
| 136 | Marsupialia, Wombat                   | 0.17% |
| 137 | Primates, Monkey Spider               | 0.17% |
| 138 | Artiodactyla, Moose                   | 0.17% |
| 139 | Aves, Eagle                           | 0.17% |
| 140 | Tubulidentata, Aardvark               | 0.17% |
| 141 | Artiodactyla, Cattle                  | 0.17% |
| 142 | Aves, Emu                             | 0.17% |
| 143 | Artiodactyla, Elk                     | 0.17% |
| 144 | Artiodactyla, Hog Red River           | 0.17% |
| 145 | Aves, Peafowl                         | 0.17% |
| 146 | Primates, Baboon                      | 0.16% |
| 147 | Artiodactyla, Sheep                   | 0.16% |
| 148 | Carnivora, Ocelot                     | 0.16% |
| 149 | Primates, Siamang                     | 0.16% |
| 150 | Perissodactyla, Rhinoceros Indian     | 0.16% |
| 151 | Amphibia, Salamander                  | 0.16% |
| 152 | Artiodactyla, Buffalo                 | 0.16% |
| 153 | Carnivora, Cat Small                  | 0.15% |
| 154 | Marsupialia, Kangaroo Tree Matschie's | 0.15% |
| 155 | Artiodactyla, Takin                   | 0.15% |
| 156 | Invertebrate, Tarantula               | 0.15% |
| 157 | Xenarthra, Armadillo                  | 0.15% |
| 158 | Amphibia, Hellbender                  | 0.15% |
| 159 | Aves, Kiwi                            | 0.15% |
| 160 | Invertebrate, Spider                  | 0.15% |
| 161 | Perissodactyla, Horse Przewalski      | 0.15% |
| 162 | Rodentia, Dog Prairie                 | 0.15% |
| 163 | Lagomorpha, Rabbit                    | 0.14% |
| 164 | Primates, Tamarin Golden Lion         | 0.14% |
| 165 | Carnivora, Coyote                     | 0.14% |
| 166 | Marsupialia, Wallaby                  | 0.14% |
| 167 | Squamata, Iguana                      | 0.14% |
| 168 | Aves, Penguin African                 | 0.14% |

|     |                                  |       |
|-----|----------------------------------|-------|
| 169 | Carnivora, Lion African          | 0.14% |
| 170 | Artiodactyla, Deer Moose         | 0.14% |
| 171 | Aves, Puffin                     | 0.14% |
| 172 | Aves, Songbird                   | 0.14% |
| 173 | Aves, Duck                       | 0.14% |
| 174 | Artiodactyla, Hoofstock African  | 0.13% |
| 175 | Aves, Waterfowl                  | 0.13% |
| 176 | Carnivora, Raccoon               | 0.13% |
| 177 | Monotremata, Echidna             | 0.13% |
| 178 | Squamata, Snake Venomous         | 0.13% |
| 179 | Aves, Kookaburra                 | 0.13% |
| 180 | Invertebrate, Invertebrate       | 0.13% |
| 181 | Squamata, Boa Constrictor        | 0.13% |
| 182 | Artiodactyla, Wildebeest         | 0.13% |
| 183 | Primates, Aye Aye                | 0.13% |
| 184 | Primates, Primate South American | 0.13% |
| 185 | Artiodactyla, Oryx               | 0.12% |
| 186 | Carnivora, Serval                | 0.12% |
| 187 | Artiodactyla, Addax              | 0.12% |
| 188 | Aves, Chicken                    | 0.12% |
| 189 | Chelonia, Tortoise Radiated      | 0.12% |
| 190 | Crocodylia, Gharial              | 0.12% |
| 191 | Pisces, Fish Eel                 | 0.12% |
| 192 | Primates, Monkey New World       | 0.12% |
| 193 | Pisces, Fish Tropical            | 0.12% |
| 194 | Squamata, Anaconda               | 0.12% |
| 195 | Artiodactyla, Kudu               | 0.12% |
| 196 | Primates, Baboon Mandrill        | 0.12% |
| 197 | Amphibia, Toad                   | 0.11% |
| 198 | Aves, Bird Of Prey               | 0.11% |
| 199 | Marsupialia, Marsupial           | 0.11% |
| 200 | Primates, New World              | 0.11% |
| 201 | Aves, Crane Whooping             | 0.11% |
| 202 | Artiodactyla, Hippopotamus Pygmy | 0.11% |
| 203 | Generic, Species Endangered      | 0.11% |
| 204 | Primates, Marmoset               | 0.11% |
| 205 | Rodentia, Naked Mole-Rat         | 0.11% |
| 206 | Carnivora, Wolverine             | 0.11% |
| 207 | Squamata, Chameleon              | 0.11% |
| 208 | Artiodactyla, Hoofstock          | 0.10% |
| 209 | Aves, Bird of Paradise           | 0.10% |
| 210 | Carnivora, Lynx                  | 0.10% |
| 211 | Carnivora, Pinnipedia            | 0.10% |
| 212 | Carnivora, Wolf Mexican Gray     | 0.10% |
| 213 | Chondrichthyes, Shark Whale      | 0.10% |
| 214 | Perissodactyla, Zebra Grevy's    | 0.10% |
| 215 | Primates, Monkey Howler          | 0.10% |
| 216 | Primates, Monkey Old World       | 0.10% |

|     |                                          |       |
|-----|------------------------------------------|-------|
| 217 | Artiodactyla, Pronghorn                  | 0.10% |
| 218 | Carnivora, Cat Sand                      | 0.10% |
| 219 | Artiodactyla, Llama                      | 0.10% |
| 220 | Aves, Bird Tropical                      | 0.10% |
| 221 | Carnivora, Cat Pallas                    | 0.10% |
| 222 | Primates, Lemur Ring-Tailed              | 0.10% |
| 223 | Aves, Stork                              | 0.10% |
| 224 | Cetacea, Vaquita                         | 0.10% |
| 225 | Squamata, Cobra                          | 0.10% |
| 226 | Carnivora, Fox Fennec                    | 0.10% |
| 227 | Carnivora, Otter Giant                   | 0.10% |
| 228 | Generic, Animals Rainforest              | 0.10% |
| 229 | Aves, Condor Andean                      | 0.09% |
| 230 | Chondrichthyes, Shark Great White        | 0.09% |
| 231 | Invertebrate, Crab                       | 0.09% |
| 232 | Artiodactyla, Babirusa                   | 0.09% |
| 233 | Aves, Passerine                          | 0.09% |
| 234 | Aves, Ratite                             | 0.09% |
| 235 | Invertebrate, Bee Honey                  | 0.09% |
| 236 | Marsupialia, Opossum                     | 0.09% |
| 237 | Pisces, Fish Clown                       | 0.09% |
| 238 | Primates, Old World                      | 0.09% |
| 239 | Squamata, Python                         | 0.09% |
| 240 | Carnivora, Fox Arctic                    | 0.09% |
| 241 | Chelonia, Tortoise Giant Aldabra         | 0.09% |
| 242 | Primates, Generic                        | 0.09% |
| 243 | Xenarthra, Tamandua                      | 0.09% |
| 244 | Aves, Swan                               | 0.09% |
| 245 | Carnivora, Otter Small Clawed            | 0.09% |
| 246 | Invertebrate, Ant                        | 0.09% |
| 247 | Aves, Bird Bali Mynah Endangered         | 0.08% |
| 248 | Aves, Bird Hummingbird                   | 0.08% |
| 249 | Perissodactyla, Donkey                   | 0.08% |
| 250 | Rodentia, Rodent                         | 0.08% |
| 251 | Aves, Eagle Harpy                        | 0.08% |
| 252 | Carnivora, Badger                        | 0.08% |
| 253 | Carnivora, Mongoose                      | 0.08% |
| 254 | Chelonia, Tortoise Giant                 | 0.08% |
| 255 | Invertebrate, Beetle                     | 0.08% |
| 256 | Perissodactyla, Tapir Malayan            | 0.08% |
| 257 | Primates, Monkey Black-and-White Colobus | 0.08% |
| 258 | Amphibia, Axolotl                        | 0.08% |
| 259 | Aves, Bird Secretary                     | 0.08% |
| 260 | Aves, Crane Crowned                      | 0.08% |
| 261 | Carnivora, Cat Fishing                   | 0.08% |
| 262 | Primates, Orangutan Sumatran             | 0.08% |
| 263 | Amphibia, Frog Panamanian Golden         | 0.08% |
| 264 | Aves, Hummingbird                        | 0.08% |

|     |                                     |       |
|-----|-------------------------------------|-------|
| 265 | Aves, Turaco                        | 0.08% |
| 266 | Carnivora, Seal Harbor              | 0.08% |
| 267 | Carnivora, Skunk                    | 0.08% |
| 268 | Perissodactyla, Rhinoceros Sumatran | 0.08% |
| 269 | Squamata, Cobra King                | 0.08% |
| 270 | Carnivora, Tiger Sumatran           | 0.07% |
| 271 | Chiroptera, Bat Fruit               | 0.07% |
| 272 | Chiroptera, Fox Flying              | 0.07% |
| 273 | Chondrichthyes, Ray Manta           | 0.07% |
| 274 | Crocodylia, Alligator Chinese       | 0.07% |
| 275 | Pisces, Fish Tuna                   | 0.07% |
| 276 | Primates, Lemur Red Ruffed          | 0.07% |
| 277 | Squamata, Gecko                     | 0.07% |
| 278 | Aves, Macaw Hyacinth                | 0.07% |
| 279 | Artiodactyla, Camel Bactrian        | 0.07% |
| 280 | Artiodactyla, Peccary               | 0.07% |
| 281 | Aves, Kea                           | 0.07% |
| 282 | Invertebrate, Squid                 | 0.07% |
| 283 | Mammalia, Mammal Marine             | 0.07% |
| 284 | Pisces, Fish Salmon                 | 0.07% |
| 285 | Primates, Macaque                   | 0.07% |
| 286 | Artiodactyla, Duiker                | 0.07% |
| 287 | Artiodactyla, Oryx Scimitar         | 0.07% |
| 288 | Aves, Falcon                        | 0.07% |
| 289 | Generic, Carnivore                  | 0.07% |
| 290 | Invertebrate, Lobster               | 0.07% |
| 291 | Artiodactyla, Eland                 | 0.07% |
| 292 | Artiodactyla, Gerenuk               | 0.07% |
| 293 | Aves, Bird Endangered               | 0.07% |
| 294 | Aves, Hornbill Southern Gound       | 0.07% |
| 295 | Carnivora, Bear Spectacled          | 0.07% |
| 296 | Generic, Animals Domesticated       | 0.07% |
| 297 | Generic, Animals Local              | 0.07% |
| 298 | Invertebrate, Anemone               | 0.07% |
| 299 | Invertebrate, Shrimp                | 0.07% |
| 300 | Pisces, Fish Sea Dragon             | 0.07% |
| 301 | Pisces, Fish Sturgeon               | 0.07% |
| 302 | Primates, Tamarin Cotton Top        | 0.07% |
| 303 | Squamata, Snake Viper               | 0.07% |
| 304 | Amphibia, Amphibian Endangered      | 0.06% |
| 305 | Aves, Stork Shoebill                | 0.06% |
| 306 | Carnivora, Canid                    | 0.06% |
| 307 | Carnivora, Tiger Bengal             | 0.06% |
| 308 | Invertebrate, Ant Leafcutter        | 0.06% |
| 309 | Aves, Ibis                          | 0.06% |
| 310 | Aves, Vulture King                  | 0.06% |
| 311 | Carnivora, Cat Black-Footed         | 0.06% |
| 312 | Invertebrate, Cuttlefish            | 0.06% |

|     |                                        |       |
|-----|----------------------------------------|-------|
| 313 | Invertebrate, Scorpion                 | 0.06% |
| 314 | Primates, Lemur Sifaka                 | 0.06% |
| 315 | Artiodactyla, Antelope Sable           | 0.06% |
| 316 | Artiodactyla, Dik-Dik                  | 0.06% |
| 317 | Carnivora, Caracal                     | 0.06% |
| 318 | Carnivora, Hyena Spotted               | 0.06% |
| 319 | Insectivora, Hedgehog                  | 0.06% |
| 320 | Invertebrate, Marine                   | 0.06% |
| 321 | Perissodactyla, Ass Somali Wild        | 0.06% |
| 322 | Artiodactyla, Caribou                  | 0.06% |
| 323 | Aves, Parrot Kakapo                    | 0.06% |
| 324 | Aves, Shorebird                        | 0.06% |
| 325 | Carnivora, Coati                       | 0.06% |
| 326 | Carnivora, Fox Red                     | 0.06% |
| 327 | Cetacea, Whale Blue                    | 0.06% |
| 328 | Chelonia, Tortoise Large               | 0.06% |
| 329 | Generic, Animals All                   | 0.06% |
| 330 | Generic, Animals Endangered            | 0.06% |
| 331 | Invertebrate, Crustacean               | 0.06% |
| 332 | Perissodactyla, Rhinoceros Javan       | 0.06% |
| 333 | Pisces, Sawfish                        | 0.06% |
| 334 | Primates, Gorilla Western Lowland      | 0.06% |
| 335 | Amphibia, Salamander Giant             | 0.05% |
| 336 | Artiodactyla, Gazelle Dama             | 0.05% |
| 337 | Artiodactyla, Impala                   | 0.05% |
| 338 | Artiodactyla, Saola                    | 0.05% |
| 339 | Aves, Bird Exotic                      | 0.05% |
| 340 | Aves, Stork Marabou                    | 0.05% |
| 341 | Carnivora, Cat Bobcat                  | 0.05% |
| 342 | Chelonia, Turtle Freshwater            | 0.05% |
| 343 | Chiroptera, Bat Vampire                | 0.05% |
| 344 | Primates, Callitrichids                | 0.05% |
| 345 | Primates, Langur                       | 0.05% |
| 346 | Primates, Loris                        | 0.05% |
| 347 | Squamata, Snake Non-Venomous           | 0.05% |
| 348 | Artiodactyla, Buffalo Water            | 0.05% |
| 349 | Artiodactyla, Pig Visayan Warty        | 0.05% |
| 350 | Aves, Dove                             | 0.05% |
| 351 | Aves, Penguin King                     | 0.05% |
| 352 | Carnivora, Dhole                       | 0.05% |
| 353 | Cetacea, Narwhal                       | 0.05% |
| 354 | Cetacea, Porpoise                      | 0.05% |
| 355 | Pisces, Fish Marine                    | 0.05% |
| 356 | Primates, Lemur Black and White Ruffed | 0.05% |
| 357 | Rodentia, Porcupine Crested            | 0.05% |
| 358 | Squamata, Lizard Monitor               | 0.05% |
| 359 | Artiodactyla, Alpaca                   | 0.05% |
| 360 | Aves, Bird African                     | 0.05% |

|     |                                     |       |
|-----|-------------------------------------|-------|
| 361 | Aves, Hornbill Asian                | 0.05% |
| 362 | Aves, Owl Burrowing                 | 0.05% |
| 363 | Aves, Owl Snowy                     | 0.05% |
| 364 | Cetacea, Cetacean                   | 0.05% |
| 365 | Generic, Species Coral Reef         | 0.05% |
| 366 | Invertebrate, Arachnid              | 0.05% |
| 367 | Primates, Monkey Squirrel           | 0.05% |
| 368 | Rhynchocephalia, Tuatara            | 0.05% |
| 369 | Squamata, Snake Giant               | 0.05% |
| 370 | Artiodactyla, Antelope African      | 0.05% |
| 371 | Aves, Bird Tawny Frogmouth          | 0.05% |
| 372 | Aves, Cockatoo                      | 0.05% |
| 373 | Aves, Crane Red Crowned             | 0.05% |
| 374 | Aves, Hornbill Rhinoceros           | 0.05% |
| 375 | Aves, Pheasant                      | 0.05% |
| 376 | Aves, Psittacines                   | 0.05% |
| 377 | Aves, Vulture African               | 0.05% |
| 378 | Carnivora, Dog Bush                 | 0.05% |
| 379 | Chelonia, Turtle Alligator Snapping | 0.05% |
| 380 | Generic, Animals Pollinators        | 0.05% |
| 381 | Mammalia, Mammal                    | 0.05% |
| 382 | Perissodactyla, Rhinoceros African  | 0.05% |
| 383 | Primates, Prosimian                 | 0.05% |
| 384 | Rodentia, Squirrel                  | 0.05% |
| 385 | Artiodactyla, Hoofstock Asian       | 0.04% |
| 386 | Artiodactyla, Oryx Arabian          | 0.04% |
| 387 | Artiodactyla, Sheep Bighorn         | 0.04% |
| 388 | Aves, Bird South America            | 0.04% |
| 389 | Aves, Pigeon                        | 0.04% |
| 390 | Aves, Spoonbill                     | 0.04% |
| 391 | Carnivora, Sea Lion California      | 0.04% |
| 392 | Carnivora, Wolf Generic             | 0.04% |
| 393 | Chelonia, Turtle Asian              | 0.04% |
| 394 | Chondrichthyes, Shark Hammerhead    | 0.04% |
| 395 | Hyracoidea, Hyrax                   | 0.04% |
| 396 | Invertebrate, Terrestrial           | 0.04% |
| 397 | Primates, Ape Lesser                | 0.04% |
| 398 | Squamata, Python Reticulated        | 0.04% |
| 399 | Squamata, Snake Endangered          | 0.04% |
| 400 | Amphibia, Frog Tree                 | 0.04% |
| 401 | Artiodactyla, Ibex                  | 0.04% |
| 402 | Artiodactyla, Ox Musk               | 0.04% |
| 403 | Aves, Bustard Kori                  | 0.04% |
| 404 | Aves, Cardinals                     | 0.04% |
| 405 | Aves, Kingfisher                    | 0.04% |
| 406 | Aves, Kingfisher Guam               | 0.04% |
| 407 | Aves, Owl Great Horned              | 0.04% |
| 408 | Aves, Stork Saddle Billed           | 0.04% |

|     |                                   |       |
|-----|-----------------------------------|-------|
| 409 | Chondrichthyes, Shark Sand Tiger  | 0.04% |
| 410 | Pisces, Fish Cat                  | 0.04% |
| 411 | Pisces, Fish Clownfish            | 0.04% |
| 412 | Primates, Baby Bush               | 0.04% |
| 413 | Primates, Monkey African          | 0.04% |
| 414 | Rodentia, Rat                     | 0.04% |
| 415 | Artiodactyla, Deer Pere David     | 0.04% |
| 416 | Artiodactyla, Goat Mountain       | 0.04% |
| 417 | Aves, Lorikeets                   | 0.04% |
| 418 | Aves, Turkey                      | 0.04% |
| 419 | Aves, Woodpecker                  | 0.04% |
| 420 | Chelonia, Turtle Snake-Necked     | 0.04% |
| 421 | Insectivora, Tenrec               | 0.04% |
| 422 | Invertebrate, Bug                 | 0.04% |
| 423 | Invertebrate, Crab Horseshoe      | 0.04% |
| 424 | Invertebrate, Oyster              | 0.04% |
| 425 | Invertebrate, Snail               | 0.04% |
| 426 | Marsupialia, Macropod             | 0.04% |
| 427 | Pisces, Fish Eel Electric         | 0.04% |
| 428 | Pisces, Fish Piranha              | 0.04% |
| 429 | Pisces, Fish Salt Water           | 0.04% |
| 430 | Pisces, Fish Trout                | 0.04% |
| 431 | Primates, Loris Slow              | 0.04% |
| 432 | Primates, Orangutan Bornean       | 0.04% |
| 433 | Squamata, Snake Viper Gaboon      | 0.04% |
| 434 | Artiodactyla, Banteng             | 0.04% |
| 435 | Artiodactyla, Buffalo Cape        | 0.04% |
| 436 | Artiodactyla, Kudu Greater        | 0.04% |
| 437 | Aves, Bird North American Song    | 0.04% |
| 438 | Aves, Corvids                     | 0.04% |
| 439 | Carnivora, Bear Asian             | 0.04% |
| 440 | Carnivora, Dingo                  | 0.04% |
| 441 | Carnivora, Kinkajou               | 0.04% |
| 442 | Chelonia, Turtle Box              | 0.04% |
| 443 | Invertebrate, Cephalopods         | 0.04% |
| 444 | Mammalia, Mammal Small            | 0.04% |
| 445 | Pisces, Fish Puffer               | 0.04% |
| 446 | Primates, Gorilla Lowland Eastern | 0.04% |
| 447 | Primates, Monkey Saki             | 0.04% |
| 448 | Sirenia, Dugong                   | 0.04% |
| 449 | Squamata, Iguana Galapagos Marine | 0.04% |
| 450 | Squamata, Monitor                 | 0.04% |
| 451 | Artiodactyla, Deer Pudu           | 0.03% |
| 452 | Artiodactyla, Duiker Zebra        | 0.03% |
| 453 | Artiodactyla, Giraffe Reticulated | 0.03% |
| 454 | Artiodactyla, Ungulate            | 0.03% |
| 455 | Aves, Chicken Prairie             | 0.03% |
| 456 | Aves, Eagle Steller's Sea         | 0.03% |

|     |                                       |       |
|-----|---------------------------------------|-------|
| 457 | Aves, Geese                           | 0.03% |
| 458 | Aves, Goose                           | 0.03% |
| 459 | Aves, Owl Barn                        | 0.03% |
| 460 | Aves, Parakeet                        | 0.03% |
| 461 | Aves, Penguin Emperor                 | 0.03% |
| 462 | Aves, Robin                           | 0.03% |
| 463 | Aves, Weaver                          | 0.03% |
| 464 | Carnivora, Tiger Malayan              | 0.03% |
| 465 | Cetacea, Dolphin Bottlenose           | 0.03% |
| 466 | Chelonia, Turtle Green Sea            | 0.03% |
| 467 | Crocodylia, Crocodile Cuban           | 0.03% |
| 468 | Invertebrate, Insect Walking Stick    | 0.03% |
| 469 | Pisces, Fish Moray Eel                | 0.03% |
| 470 | Primates, Guenons                     | 0.03% |
| 471 | Primates, Macaque Japanese            | 0.03% |
| 472 | Primates, Primate                     | 0.03% |
| 473 | Primates, Small                       | 0.03% |
| 474 | Rodentia, Porcupine Prehensile Tailed | 0.03% |
| 475 | Artiodactyla, Anoa                    | 0.03% |
| 476 | Artiodactyla, Antelope Saiga          | 0.03% |
| 477 | Artiodactyla, Markhor                 | 0.03% |
| 478 | Artiodactyla, Springbok               | 0.03% |
| 479 | Aves, Bee Eater                       | 0.03% |
| 480 | Aves, Eagle Golden                    | 0.03% |
| 481 | Aves, Penguin Antarctica              | 0.03% |
| 482 | Aves, Penguin Humboldt                | 0.03% |
| 483 | Aves, Rail Guam                       | 0.03% |
| 484 | Aves, Rheas                           | 0.03% |
| 485 | Carnivora, Bear North American        | 0.03% |
| 486 | Carnivora, Civet                      | 0.03% |
| 487 | Carnivora, Ferret                     | 0.03% |
| 488 | Carnivora, Leopard African            | 0.03% |
| 489 | Chelonia, Tortoise Asian Forest       | 0.03% |
| 490 | Chelonia, Turtle Leatherback          | 0.03% |
| 491 | Hyracoidea, Hyrax Rock                | 0.03% |
| 492 | Insectivora, Shrew Elephant           | 0.03% |
| 493 | Invertebrate, Coral Hard              | 0.03% |
| 494 | Perissodactyla, Tapir Baird's         | 0.03% |
| 495 | Pisces, Fish Pufferfish               | 0.03% |
| 496 | Reptilia, Reptile Endangered          | 0.03% |
| 497 | Artiodactyla, Gaur                    | 0.03% |
| 498 | Artiodactyla, Gazelle Thomsons        | 0.03% |
| 499 | Artiodactyla, Hippopotamus Nile       | 0.03% |
| 500 | Artiodactyla, Klipspringer            | 0.03% |
| 501 | Aves, Curassow                        | 0.03% |
| 502 | Aves, Falcon Peregrine                | 0.03% |
| 503 | Aves, Owl Eurasian Eagle              | 0.03% |
| 504 | Aves, Owl Screech                     | 0.03% |

|     |                                          |       |
|-----|------------------------------------------|-------|
| 505 | Aves, Penguin Rockhopper                 | 0.03% |
| 506 | Aves, Roadrunner                         | 0.03% |
| 507 | Carnivora, Badger Honey                  | 0.03% |
| 508 | Cetacea, Whale Humpback                  | 0.03% |
| 509 | Generic, Life Marine                     | 0.03% |
| 510 | Invertebrate, Beetle Dung                | 0.03% |
| 511 | Invertebrate, Dragonflies                | 0.03% |
| 512 | Invertebrate, Insect Rainforest          | 0.03% |
| 513 | Pisces, Fish Amazon                      | 0.03% |
| 514 | Pisces, Fish Angel                       | 0.03% |
| 515 | Pisces, Fish Bass                        | 0.03% |
| 516 | Pisces, Fish Endangered                  | 0.03% |
| 517 | Primates, Gorilla Mountain               | 0.03% |
| 518 | Primates, Monkey Colobus                 | 0.03% |
| 519 | Primates, Monkey Owl                     | 0.03% |
| 520 | Rodentia, Porcupine North American       | 0.03% |
| 521 | Squamata, Gecko Leaf Tailed              | 0.03% |
| 522 | Squamata, Snake Eastern Indigo           | 0.03% |
| 523 | Xenarthra, Sloth Two-Toed                | 0.03% |
| 524 | Amphibia, Toad Wyoming                   | 0.03% |
| 525 | Artiodactyla, Gazelle Slender-Horned     | 0.03% |
| 526 | Artiodactyla, Gemsbok                    | 0.03% |
| 527 | Artiodactyla, Peccary Chacoan            | 0.03% |
| 528 | Artiodactyla, Reindeer                   | 0.03% |
| 529 | Aves, Finch                              | 0.03% |
| 530 | Aves, Hammerkop                          | 0.03% |
| 531 | Aves, Heron                              | 0.03% |
| 532 | Aves, Swan Trumpeter                     | 0.03% |
| 533 | Chelonia, Turtle Mata Mata               | 0.03% |
| 534 | Crocodylia, Crocodile Saltwater          | 0.03% |
| 535 | Crocodylia, Crocodile Tomistoma          | 0.03% |
| 536 | Crocodylia, Crocodilia                   | 0.03% |
| 537 | Generic, Animals African                 | 0.03% |
| 538 | Invertebrate, Insect Endangered          | 0.03% |
| 539 | Invertebrate, Mantis Praying             | 0.03% |
| 540 | Perissodactyla, Zebra Hartman's Mountain | 0.03% |
| 541 | Pisces, Fish Gold                        | 0.03% |
| 542 | Pisces, Fish Grouper                     | 0.03% |
| 543 | Primates, Mandrill                       | 0.03% |
| 544 | Primates, Monkey Asian                   | 0.03% |
| 545 | Reptilia, Reptile and Amphibians         | 0.03% |
| 546 | Rodentia, Mice                           | 0.03% |
| 547 | Squamata, Snake Louisiana Pine           | 0.03% |
| 548 | Amphibia, Frog Rainforest                | 0.03% |
| 549 | Amphibia, Frog Tropical Species          | 0.03% |
| 550 | Artiodactyla, Bontebok                   | 0.03% |
| 551 | Artiodactyla, Deer Muntjac               | 0.03% |
| 552 | Artiodactyla, Duiker Yellow-Backed       | 0.03% |

|     |                                       |       |
|-----|---------------------------------------|-------|
| 553 | Aves, Cockatoo Great Palm             | 0.03% |
| 554 | Aves, Macaw Blue-Throated             | 0.03% |
| 555 | Aves, Parrot Thick Billed             | 0.03% |
| 556 | Aves, Penguin Galapagos               | 0.03% |
| 557 | Aves, Penguin Temperate               | 0.03% |
| 558 | Aves, Pigeon Nicobar                  | 0.03% |
| 559 | Aves, Raven                           | 0.03% |
| 560 | Carnivora, Jackal                     | 0.03% |
| 561 | Carnivora, Puma Florida               | 0.03% |
| 562 | Chelonia, Tortoise Gopher             | 0.03% |
| 563 | Chelonia, Turtle Snapping             | 0.03% |
| 564 | Crocodylia, Caiman                    | 0.03% |
| 565 | Generic, Animals Arctic               | 0.03% |
| 566 | Generic, Animals Large                | 0.03% |
| 567 | Invertebrate, Beetle American Burying | 0.03% |
| 568 | Marsupialia, Kangaroo Red             | 0.03% |
| 569 | Pisces, Fish Lionfish                 | 0.03% |
| 570 | Pisces, Fish Sword                    | 0.03% |
| 571 | Primates, Capuchin                    | 0.03% |
| 572 | Primates, Endangered                  | 0.03% |
| 573 | Primates, Tamarin Emperor             | 0.03% |
| 574 | Squamata, Lizard Horned               | 0.03% |
| 575 | Amphibia, Caecilian                   | 0.02% |
| 576 | Amphibia, Frog Endangered             | 0.02% |
| 577 | Amphibia, Salamander Chinese Giant    | 0.02% |
| 578 | Amphibia, Salamander Giant Japanese   | 0.02% |
| 579 | Amphibia, Toad Puerto Rican Crested   | 0.02% |
| 580 | Amphibia, Toad, Houston               | 0.02% |
| 581 | Aves, Bird North American             | 0.02% |
| 582 | Aves, Bird Songbirds Asian            | 0.02% |
| 583 | Aves, Crane Sandhill                  | 0.02% |
| 584 | Aves, Geese Nene                      | 0.02% |
| 585 | Aves, Hornbill Ground                 | 0.02% |
| 586 | Aves, Jays Blue                       | 0.02% |
| 587 | Aves, Tern Inca                       | 0.02% |
| 588 | Aves, Thrush Blue Crowned Laughing    | 0.02% |
| 589 | Carnivora, Canid Small                | 0.02% |
| 590 | Carnivora, Felid Small                | 0.02% |
| 591 | Carnivora, Felids                     | 0.02% |
| 592 | Carnivora, Fisher                     | 0.02% |
| 593 | Carnivora, Fox Bat Eared              | 0.02% |
| 594 | Carnivora, Fox Gray                   | 0.02% |
| 595 | Carnivora, Jaguarundi                 | 0.02% |
| 596 | Carnivora, Mustelidae                 | 0.02% |
| 597 | Chondrichthyes, Cownose Ray           | 0.02% |
| 598 | Chondrichthyes, Shark Sandbar         | 0.02% |
| 599 | Chondrichthyes, Shark Tiger           | 0.02% |
| 600 | Invertebrate, Crayfish                | 0.02% |

|     |                                    |       |
|-----|------------------------------------|-------|
| 601 | Invertebrate, Insect Stick Walking | 0.02% |
| 602 | Invertebrate, Mussel Freshwater    | 0.02% |
| 603 | Invertebrate, Nudibranch           | 0.02% |
| 604 | Pisces, Cichlid                    | 0.02% |
| 605 | Pisces, Fish Cichlid African       | 0.02% |
| 606 | Primates, Loris Pygmy Slow         | 0.02% |
| 607 | Rodentia, Agouti                   | 0.02% |
| 608 | Squamata, Iguana Grand Cayman Blue | 0.02% |
| 609 | Squamata, Mamba Black              | 0.02% |
| 610 | Squamata, Python Burmese           | 0.02% |
| 611 | Squamata, Python Green Tree        | 0.02% |
| 612 | Squamata, Skink Prehensile Tailed  | 0.02% |
| 613 | Xenarthra, Anteater Giant          | 0.02% |
| 614 | Amphibia, Amphibian Rainforest     | 0.02% |
| 615 | Amphibia, Frog South American      | 0.02% |
| 616 | Artiodactyla, Goat Domestic        | 0.02% |
| 617 | Artiodactyla, Nyala                | 0.02% |
| 618 | Aves, Albatross                    | 0.02% |
| 619 | Aves, Aracari                      | 0.02% |
| 620 | Aves, Bird Asia                    | 0.02% |
| 621 | Aves, Bustard                      | 0.02% |
| 622 | Aves, Canary                       | 0.02% |
| 623 | Aves, Cock-of-the-Rock             | 0.02% |
| 624 | Aves, Flamingo Chilean             | 0.02% |
| 625 | Aves, Macaw Spix's                 | 0.02% |
| 626 | Aves, Pigeon Victoria Crowned      | 0.02% |
| 627 | Aves, Vulture Turkey               | 0.02% |
| 628 | Carnivora, Lynx Canadian           | 0.02% |
| 629 | Carnivora, Mink                    | 0.02% |
| 630 | Carnivora, Seal Hawaiian Monk      | 0.02% |
| 631 | Chelonia, Aquatic Turtles          | 0.02% |
| 632 | Chelonia, Tortoise Ploughshare     | 0.02% |
| 633 | Chelonia, Turtle Endangered        | 0.02% |
| 634 | Chelonia, Turtle Fly River         | 0.02% |
| 635 | Chelonia, Turtle Spotted           | 0.02% |
| 636 | Chondrichthyes, Elasmobranchs      | 0.02% |
| 637 | Generic, Animals Local Endangered  | 0.02% |
| 638 | Generic, Animals North America     | 0.02% |
| 639 | Generic, Pachyderm                 | 0.02% |
| 640 | Generic, Species All               | 0.02% |
| 641 | Generic, Species Reintroduction    | 0.02% |
| 642 | Invertebrate, Bumblebee            | 0.02% |
| 643 | Invertebrate, Clam                 | 0.02% |
| 644 | Invertebrate, Cockroach            | 0.02% |
| 645 | Invertebrate, Millipedes           | 0.02% |
| 646 | Perissodactyla, Ass Wild           | 0.02% |
| 647 | Pisces, Fish Humphead Wrasse       | 0.02% |
| 648 | Primates, African                  | 0.02% |

|     |                                       |       |
|-----|---------------------------------------|-------|
| 649 | Primates, Drill                       | 0.02% |
| 650 | Primates, Lemur Mongoose              | 0.02% |
| 651 | Primates, Monkey DeBrazza             | 0.02% |
| 652 | Rodentia, Groundhog                   | 0.02% |
| 653 | Rodentia, Hamster                     | 0.02% |
| 654 | Squamata, Lizard Basilisk             | 0.02% |
| 655 | Squamata, Skink                       | 0.02% |
| 656 | Squamata, Snake Hognose               | 0.02% |
| 657 | Squamata, Snake King                  | 0.02% |
| 658 | Artiodactyla, Boar                    | 0.02% |
| 659 | Artiodactyla, Gazelle Speke's         | 0.02% |
| 660 | Aves, Crow                            | 0.02% |
| 661 | Aves, Goose Red-Breasted              | 0.02% |
| 662 | Aves, Hornbill African Grey           | 0.02% |
| 663 | Aves, Hornbill Southern Ground        | 0.02% |
| 664 | Aves, Penguin Little                  | 0.02% |
| 665 | Aves, Pigeon Crowned                  | 0.02% |
| 666 | Aves, Quail                           | 0.02% |
| 667 | Aves, Ratite Cassowary Double Wattled | 0.02% |
| 668 | Aves, Sparrow                         | 0.02% |
| 669 | Aves, Toucan Toco                     | 0.02% |
| 670 | Aves, Vulture Old World               | 0.02% |
| 671 | Carnivora, Cat African                | 0.02% |
| 672 | Carnivora, Felid                      | 0.02% |
| 673 | Carnivora, Fox Swift                  | 0.02% |
| 674 | Carnivora, Seal Elephant              | 0.02% |
| 675 | Chelonia, Tortoise Aldabra Giant      | 0.02% |
| 676 | Chelonia, Tortoise Endangered         | 0.02% |
| 677 | Chelonia, Tortoise Pancake            | 0.02% |
| 678 | Chelonia, Turtle Blanding's           | 0.02% |
| 679 | Chelonia, Turtle Hawksbill            | 0.02% |
| 680 | Chiroptera, Bat North American        | 0.02% |
| 681 | Generic, Animals Australian           | 0.02% |
| 682 | Generic, Predators                    | 0.02% |
| 683 | Generic, Species Keystone             | 0.02% |
| 684 | Invertebrate, Cockroach Hissing       | 0.02% |
| 685 | Invertebrate, Mantids                 | 0.02% |
| 686 | Invertebrate, Mollusk                 | 0.02% |
| 687 | Invertebrate, Moth                    | 0.02% |
| 688 | Invertebrate, Nautilus Chambered      | 0.02% |
| 689 | Invertebrate, Urchin Sea              | 0.02% |
| 690 | Invertebrate, Worms                   | 0.02% |
| 691 | Marsupialia, Possum                   | 0.02% |
| 692 | Monotremata, Monotremes               | 0.02% |
| 693 | Perissodactyla, Tapir South America   | 0.02% |
| 694 | Pisces, Arapaima                      | 0.02% |
| 695 | Pisces, Fish Flounder                 | 0.02% |
| 696 | Pisces, Fish Parrot                   | 0.02% |

|     |                                        |       |
|-----|----------------------------------------|-------|
| 697 | Pisces, Ocean Sunfish                  | 0.02% |
| 698 | Primates, Asian                        | 0.02% |
| 699 | Primates, Gibbon White Cheeked         | 0.02% |
| 700 | Primates, Marmoset Pygmy               | 0.02% |
| 701 | Primates, Monkey Proboscis             | 0.02% |
| 702 | Primates, Primate Small                | 0.02% |
| 703 | Rodentia, Chinchilla                   | 0.02% |
| 704 | Squamata, Bushmaster                   | 0.02% |
| 705 | Squamata, Dragon Bearded               | 0.02% |
| 706 | Squamata, Lizard Cayman                | 0.02% |
| 707 | Squamata, Lizard Endangered            | 0.02% |
| 708 | Squamata, Lizard Frilled-Neck          | 0.02% |
| 709 | Squamata, Monster Gila                 | 0.02% |
| 710 | Squamata, Snake Large Constrictor      | 0.02% |
| 711 | Xenarthra, Armadillo Giant             | 0.02% |
| 712 | Amphibia, Amphibian South American     | 0.02% |
| 713 | Artiodactyla, Camelids                 | 0.02% |
| 714 | Artiodactyla, Deer White Tailed        | 0.02% |
| 715 | Artiodactyla, Duiker Blue              | 0.02% |
| 716 | Artiodactyla, Eland Giant              | 0.02% |
| 717 | Artiodactyla, Guanaco                  | 0.02% |
| 718 | Artiodactyla, Hoofstock North American | 0.02% |
| 719 | Artiodactyla, Kudu Lesser              | 0.02% |
| 720 | Artiodactyla, Waterbuck                | 0.02% |
| 721 | Artiodactyla, Yak                      | 0.02% |
| 722 | Aves, Bird Amazon                      | 0.02% |
| 723 | Aves, Bird Desert                      | 0.02% |
| 724 | Aves, Bird Roller                      | 0.02% |
| 725 | Aves, Bluebird                         | 0.02% |
| 726 | Aves, Crane Wattled                    | 0.02% |
| 727 | Aves, Eagle Philippine                 | 0.02% |
| 728 | Aves, Flamingo Lesser                  | 0.02% |
| 729 | Aves, Frogmouth                        | 0.02% |
| 730 | Aves, Guineafowl                       | 0.02% |
| 731 | Aves, Kagu                             | 0.02% |
| 732 | Aves, Macaw Scarlet                    | 0.02% |
| 733 | Aves, Osprey                           | 0.02% |
| 734 | Aves, Parrot African Grey              | 0.02% |
| 735 | Aves, Partridge Crested Wood           | 0.02% |
| 736 | Aves, Penguin Gentoo                   | 0.02% |
| 737 | Aves, Pheasant Edwards                 | 0.02% |
| 738 | Aves, Tanager                          | 0.02% |
| 739 | Aves, Vulture Cinereous                | 0.02% |
| 740 | Carnivora, Cat Domestic                | 0.02% |
| 741 | Carnivora, Cheetah African             | 0.02% |
| 742 | Carnivora, Felid Large                 | 0.02% |
| 743 | Carnivora, Large                       | 0.02% |
| 744 | Carnivora, Margay                      | 0.02% |

|     |                                        |       |
|-----|----------------------------------------|-------|
| 745 | Carnivora, Weasel                      | 0.02% |
| 746 | Chelonia, Tortoise Desert              | 0.02% |
| 747 | Chelonia, Tortoise Small               | 0.02% |
| 748 | Chelonia, Turtle Bog                   | 0.02% |
| 749 | Chelonia, Turtle Loggerhead Sea        | 0.02% |
| 750 | Chondrichthyes, Fresh Water Stingray   | 0.02% |
| 751 | Chondrichthyes, Ray Spotted Eagle      | 0.02% |
| 752 | Chondrichthyes, Shark Nurse            | 0.02% |
| 753 | Chondrichthyes, Shark Small            | 0.02% |
| 754 | Crocodylia, Crocodile Slender Snout    | 0.02% |
| 755 | Crocodylia, Gharial Indian             | 0.02% |
| 756 | Insectivora, Mole                      | 0.02% |
| 757 | Invertebrate, Aquatic Invertebrates    | 0.02% |
| 758 | Invertebrate, Snail Partula            | 0.02% |
| 759 | Invertebrate, Spider Goliath Birdeater | 0.02% |
| 760 | Pisces, Cichlid Lake Victoria          | 0.02% |
| 761 | Pisces, Fish Bluefin Tuna              | 0.02% |
| 762 | Pisces, Fish Pacu                      | 0.02% |
| 763 | Pisces, Fish South American            | 0.02% |
| 764 | Primates, Lemur Indri                  | 0.02% |
| 765 | Primates, Monkey Diana                 | 0.02% |
| 766 | Primates, Monkey Rainforest            | 0.02% |
| 767 | Primates, Potto                        | 0.02% |
| 768 | Rodentia, Rat Mole                     | 0.02% |
| 769 | Rodentia, Squirrel Flying              | 0.02% |
| 770 | Squamata, Boa Emerald Tree             | 0.02% |
| 771 | Squamata, Iguana Fiji Banded           | 0.02% |
| 772 | Squamata, Mamba                        | 0.02% |
| 773 | Squamata, Toad Horny                   | 0.02% |
| 774 | Xenarthra, Armadillo Banded            | 0.02% |
| 775 | Xenarthra, Sloth Three-Toed            | 0.02% |
| 776 | Amphibia, Amphibian African            | 0.01% |
| 777 | Amphibia, Amphibian North American     | 0.01% |
| 778 | Amphibia, Frog Glass                   | 0.01% |
| 779 | Amphibia, Frog Tomato                  | 0.01% |
| 780 | Artiodactyla, Blackbuck                | 0.01% |
| 781 | Artiodactyla, Buffalo African Savannah | 0.01% |
| 782 | Artiodactyla, Goat Wild                | 0.01% |
| 783 | Artiodactyla, Goral                    | 0.01% |
| 784 | Artiodactyla, Ibex Nubian              | 0.01% |
| 785 | Artiodactyla, Pig Wild                 | 0.01% |
| 786 | Artiodactyla, Sheep Barbary            | 0.01% |
| 787 | Artiodactyla, Vicuna                   | 0.01% |
| 788 | Aves, Bird Australian                  | 0.01% |
| 789 | Aves, Bird Migratory                   | 0.01% |
| 790 | Aves, Bird Sea                         | 0.01% |
| 791 | Aves, Booby Blue Footed                | 0.01% |
| 792 | Aves, Crane Asian                      | 0.01% |

|     |                                     |       |
|-----|-------------------------------------|-------|
| 793 | Aves, Crane Blue                    | 0.01% |
| 794 | Aves, Crane Sarus                   | 0.01% |
| 795 | Aves, Crane White Naped             | 0.01% |
| 796 | Aves, Dove Bleeding Heart           | 0.01% |
| 797 | Aves, Duck Wood                     | 0.01% |
| 798 | Aves, Hornbill Wrinkled             | 0.01% |
| 799 | Aves, Merganser Scaly Sided         | 0.01% |
| 800 | Aves, Motmot, Blue Crowned          | 0.01% |
| 801 | Aves, Owl Barred                    | 0.01% |
| 802 | Aves, Vulture Lappet Faced          | 0.01% |
| 803 | Aves, Vulture New World             | 0.01% |
| 804 | Aves, Vulture White Backed          | 0.01% |
| 805 | Carnivora, Aardwolf                 | 0.01% |
| 806 | Cetacea, Dolphin Amazon River       | 0.01% |
| 807 | Cetacea, Whale Sperm                | 0.01% |
| 808 | Chelonia, Chelonian                 | 0.01% |
| 809 | Chelonia, Turtle Asian Box          | 0.01% |
| 810 | Chiroptera, Bat Fruit Rodrigues     | 0.01% |
| 811 | Chondrichthyes, Shark Blacktip Reef | 0.01% |
| 812 | Chondrichthyes, Skate               | 0.01% |
| 813 | Crocodylia, Crocodile Nile          | 0.01% |
| 814 | Crocodylia, Gharial False           | 0.01% |
| 815 | Generic, Animals Extinct in wild    | 0.01% |
| 816 | Insectivora, Shrew Tree             | 0.01% |
| 817 | Invertebrate, Crab Giant Spider     | 0.01% |
| 818 | Invertebrate, Crab Hermit           | 0.01% |
| 819 | Invertebrate, Grasshopper           | 0.01% |
| 820 | Lagomorpha, Pikas                   | 0.01% |
| 821 | Marsupialia, Glider Sugar           | 0.01% |
| 822 | Perissodactyla, Equid               | 0.01% |
| 823 | Perissodactyla, Horse Wild          | 0.01% |
| 824 | Perissodactyla, Mule                | 0.01% |
| 825 | Pisces, Fish Cod                    | 0.01% |
| 826 | Pisces, Fish Koi                    | 0.01% |
| 827 | Pisces, Fish Native                 | 0.01% |
| 828 | Pisces, Fish North American         | 0.01% |
| 829 | Pisces, Fish Rockfish               | 0.01% |
| 830 | Pisces, Fish Sturgeon Lake          | 0.01% |
| 831 | Pisces, Paddlefish                  | 0.01% |
| 832 | Primates, Lemur Mouse               | 0.01% |
| 833 | Rodentia, Chipmunk                  | 0.01% |
| 834 | Squamata, Iguana Caribbean          | 0.01% |
| 835 | Squamata, Lizard Chuckwalla         | 0.01% |
| 836 | Squamata, Mamba Green               | 0.01% |
| 837 | Squamata, Megafauna                 | 0.01% |
| 838 | Squamata, Python Ball               | 0.01% |
| 839 | Squamata, Python Large              | 0.01% |
| 840 | Squamata, Snake African             | 0.01% |

|     |                                          |       |
|-----|------------------------------------------|-------|
| 841 | Squamata, Snake Aruba Island Rattlesnake | 0.01% |
| 842 | Squamata, Snake Coral                    | 0.01% |
| 843 | Squamata, Snake Native Species           | 0.01% |
| 844 | Squamata, Snake Rainforest               | 0.01% |
| 845 | Amphibia, Amphibian Asia                 | 0.01% |
| 846 | Amphibia, Newt                           | 0.01% |
| 847 | Amphibia, Salamander Giant Chinese       | 0.01% |
| 848 | Amphibia, Toad Kihansi Spray             | 0.01% |
| 849 | Artiodactyla, Antelope Desert African    | 0.01% |
| 850 | Artiodactyla, Antelope Roan              | 0.01% |
| 851 | Artiodactyla, Cow                        | 0.01% |
| 852 | Artiodactyla, Deer Reindeer              | 0.01% |
| 853 | Artiodactyla, Hartebeest                 | 0.01% |
| 854 | Artiodactyla, Hirola                     | 0.01% |
| 855 | Artiodactyla, Ox                         | 0.01% |
| 856 | Artiodactyla, Sitatunga                  | 0.01% |
| 857 | Artiodactyla, Ungulate African           | 0.01% |
| 858 | Aves, Auks                               | 0.01% |
| 859 | Aves, Crane African                      | 0.01% |
| 860 | Aves, Crane Grey Crowned                 | 0.01% |
| 861 | Aves, Curassow Blue-Billed               | 0.01% |
| 862 | Aves, Dove Fruit                         | 0.01% |
| 863 | Aves, Flamingo Caribbean                 | 0.01% |
| 864 | Aves, Flamingo Greater                   | 0.01% |
| 865 | Aves, Goose Nene                         | 0.01% |
| 866 | Aves, Ibis Waldrapp                      | 0.01% |
| 867 | Aves, Maleo                              | 0.01% |
| 868 | Aves, Mockingbird                        | 0.01% |
| 869 | Aves, Mynah Bali                         | 0.01% |
| 870 | Aves, Parrot Hawk-Headed                 | 0.01% |
| 871 | Aves, Parrot South American              | 0.01% |
| 872 | Aves, Pelican Dalmatian                  | 0.01% |
| 873 | Aves, Penguin Macaroni                   | 0.01% |
| 874 | Aves, Pheasant Argus                     | 0.01% |
| 875 | Aves, Quetzal                            | 0.01% |
| 876 | Aves, Raptor Large                       | 0.01% |
| 877 | Aves, Spoonbill Roseate                  | 0.01% |
| 878 | Aves, Sunbittern                         | 0.01% |
| 879 | Aves, Vulture Asian                      | 0.01% |
| 880 | Aves, Vulture Bearded                    | 0.01% |
| 881 | Aves, Vulture Ruppell                    | 0.01% |
| 882 | Carnivora, Bear South American           | 0.01% |
| 883 | Carnivora, Fox Channel Island            | 0.01% |
| 884 | Chelonia, Tortoise Egyptian              | 0.01% |
| 885 | Chelonia, Tortoise Spider                | 0.01% |
| 886 | Chelonia, Turtle Kemps Ridley Sea        | 0.01% |
| 887 | Chelonia, Turtle Terrestrial             | 0.01% |
| 888 | Chelonia, Turtle Western Pond            | 0.01% |

|     |                                              |       |
|-----|----------------------------------------------|-------|
| 889 | Chelonia, Turtle Wood                        | 0.01% |
| 890 | Chiroptera, Microbat                         | 0.01% |
| 891 | Chondrichthyes, Ray Eagle                    | 0.01% |
| 892 | Chondrichthyes, Ray Freshwater               | 0.01% |
| 893 | Chondrichthyes, Shark Large                  | 0.01% |
| 894 | Crocodylia, Crocodile African                | 0.01% |
| 895 | Generic, Animals Desert                      | 0.01% |
| 896 | Generic, Animals Domesticated Heritage Breed | 0.01% |
| 897 | Generic, Animals Island                      | 0.01% |
| 898 | Generic, Animals Rescued                     | 0.01% |
| 899 | Generic, Animals South America               | 0.01% |
| 900 | Generic, Animals Trafficked                  | 0.01% |
| 901 | Generic, Victims Climate Change              | 0.01% |
| 902 | Insectivora, Shrew                           | 0.01% |
| 903 | Invertebrate, Aquatic                        | 0.01% |
| 904 | Invertebrate, Bee Native                     | 0.01% |
| 905 | Invertebrate, Butterfly Karner Blue          | 0.01% |
| 906 | Invertebrate, Centipede                      | 0.01% |
| 907 | Invertebrate, Echinoderm                     | 0.01% |
| 908 | Invertebrate, Insect Leaf                    | 0.01% |
| 909 | Invertebrate, Mosquito                       | 0.01% |
| 910 | Invertebrate, Shellfish                      | 0.01% |
| 911 | Invertebrate, Tarantula Blue Sapphire        | 0.01% |
| 912 | Invertebrate, Wasp                           | 0.01% |
| 913 | Lagomorpha, Hare                             | 0.01% |
| 914 | Mammalia, Mammal African                     | 0.01% |
| 915 | Mammalia, Mammal Aquatic                     | 0.01% |
| 916 | Mammalia, Mammal Large                       | 0.01% |
| 917 | Mammalia, Mammal Rainforest                  | 0.01% |
| 918 | Marsupialia, Kangaroo Grey                   | 0.01% |
| 919 | Marsupialia, Kangaroo Rat                    | 0.01% |
| 920 | Marsupialia, Quokka                          | 0.01% |
| 921 | Perissodactyla, Equid Endangered             | 0.01% |
| 922 | Perissodactyla, Horse Asian Wild             | 0.01% |
| 923 | Pisces, Arrowana                             | 0.01% |
| 924 | Pisces, Fish Cichlid                         | 0.01% |
| 925 | Pisces, Fish Coelacanth                      | 0.01% |
| 926 | Pisces, Fish Deep Sea                        | 0.01% |
| 927 | Pisces, Fish Desert Pupfish                  | 0.01% |
| 928 | Pisces, Fish Exotic                          | 0.01% |
| 929 | Pisces, Fish Perch                           | 0.01% |
| 930 | Pisces, Fish Rainbow                         | 0.01% |
| 931 | Pisces, Fish Sun                             | 0.01% |
| 932 | Pisces, Fish Trigger                         | 0.01% |
| 933 | Primates, Gelada                             | 0.01% |
| 934 | Primates, Tamarin Pied                       | 0.01% |
| 935 | Rodentia, Cavy Patagonian                    | 0.01% |
| 936 | Rodentia, Marmot                             | 0.01% |

|     |                                             |       |
|-----|---------------------------------------------|-------|
| 937 | Rodentia, Marmot Vancouver Island           | 0.01% |
| 938 | Rodentia, Rodent Large                      | 0.01% |
| 939 | Squamata, Copperhead                        | 0.01% |
| 940 | Squamata, Iguana Caribbean Rock             | 0.01% |
| 941 | Squamata, Lizard Gila Monster               | 0.01% |
| 942 | Squamata, Lizard Glass                      | 0.01% |
| 943 | Squamata, Lizard Tegu                       | 0.01% |
| 944 | Squamata, Monitor Komodo Dragon             | 0.01% |
| 945 | Squamata, Skink Blue Tongued                | 0.01% |
| 946 | Squamata, Snake Rat                         | 0.01% |
| 947 | Squamata, Snake Viper Mang Mountain         | 0.01% |
| 948 | Xenarthra, Armadillo Brazilian Three-Banded | 0.01% |
| 949 | Xenarthra, Generic                          | 0.01% |
| 950 | Amphibia, Bullfrog                          | 0.01% |
| 951 | Amphibia, Bullfrog American                 | 0.01% |
| 952 | Amphibia, Frog Goliath                      | 0.01% |
| 953 | Amphibia, Frog Yellow Legged Mountain       | 0.01% |
| 954 | Amphibia, Salamander Aquatic Siren          | 0.01% |
| 955 | Amphibia, Toad South American               | 0.01% |
| 956 | Artiodactyla, Blesbok                       | 0.01% |
| 957 | Artiodactyla, Bongo Mountain                | 0.01% |
| 958 | Artiodactyla, Cattle Domestic               | 0.01% |
| 959 | Artiodactyla, Deer Asian                    | 0.01% |
| 960 | Artiodactyla, Deer Eld's                    | 0.01% |
| 961 | Artiodactyla, Deer Tufted                   | 0.01% |
| 962 | Artiodactyla, Duiker Jentink's              | 0.01% |
| 963 | Proboscidea, Elephant Sumatran              | 0.01% |
| 964 | Artiodactyla, Giraffe Masai                 | 0.01% |
| 965 | Artiodactyla, Hoofstock South American      | 0.01% |
| 966 | Artiodactyla, Lechwe Nile                   | 0.01% |
| 967 | Artiodactyla, Oryx East African             | 0.01% |
| 968 | Artiodactyla, Sheep Mountain                | 0.01% |
| 969 | Artiodactyla, Takin Sichuan                 | 0.01% |
| 970 | Aves, Bird Hawaiian                         | 0.01% |
| 971 | Aves, Bird Island                           | 0.01% |
| 972 | Aves, Bird Local                            | 0.01% |
| 973 | Aves, Bird Small                            | 0.01% |
| 974 | Aves, Crane Demoiselle                      | 0.01% |
| 975 | Aves, Dove Jambu Fruit                      | 0.01% |
| 976 | Aves, Dove Mariana Fruit                    | 0.01% |
| 977 | Aves, Duck Endangered                       | 0.01% |
| 978 | Aves, Duck Mandarin                         | 0.01% |
| 979 | Aves, Egret                                 | 0.01% |
| 980 | Aves, Falcon African Pygmy                  | 0.01% |
| 981 | Aves, Flamingo American                     | 0.01% |
| 982 | Aves, Gull                                  | 0.01% |
| 983 | Aves, Hawk Red Tail                         | 0.01% |
| 984 | Aves, Ibis Scarlet                          | 0.01% |

|      |                                     |       |
|------|-------------------------------------|-------|
| 985  | Aves, Loon                          | 0.01% |
| 986  | Aves, Oriole                        | 0.01% |
| 987  | Aves, Owl Great Grey                | 0.01% |
| 988  | Aves, Owl New World                 | 0.01% |
| 989  | Aves, Parrot Amazon                 | 0.01% |
| 990  | Aves, Parrot Endangered             | 0.01% |
| 991  | Aves, Passerine Rainforest          | 0.01% |
| 992  | Aves, Peafowl Green                 | 0.01% |
| 993  | Aves, Penguin Magellanic            | 0.01% |
| 994  | Aves, Quetzal Resplendent           | 0.01% |
| 995  | Aves, Raptor Endangered             | 0.01% |
| 996  | Aves, Screamer                      | 0.01% |
| 997  | Aves, Seriema                       | 0.01% |
| 998  | Aves, Tern                          | 0.01% |
| 999  | Aves, Toucan Keel Billed            | 0.01% |
| 1000 | Aves, Vulture Hooded                | 0.01% |
| 1001 | Carnivora, Arctic                   | 0.01% |
| 1002 | Carnivora, Cat Big Asian            | 0.01% |
| 1003 | Carnivora, Cat Medium               | 0.01% |
| 1004 | Carnivora, Cat South American       | 0.01% |
| 1005 | Carnivora, Otter Asian              | 0.01% |
| 1006 | Carnivora, Otter, Neotropical River | 0.01% |
| 1007 | Carnivora, Ringtail                 | 0.01% |
| 1008 | Carnivora, Sea Lion Steller         | 0.01% |
| 1009 | Carnivora, Seal Fur                 | 0.01% |
| 1010 | Carnivora, Seal Ribbon              | 0.01% |
| 1011 | Cetacea, Cetacean Small             | 0.01% |
| 1012 | Chelonia, Tortoise African          | 0.01% |
| 1013 | Chondrichthyes, Shark Basking       | 0.01% |
| 1014 | Crocodylia, Caiman Dwarf            | 0.01% |
| 1015 | Crocodylia, Crocodile Orinoco       | 0.01% |
| 1016 | Crocodylia, Crocodile Siamese       | 0.01% |
| 1017 | Crocodylia, Gharial Malay           | 0.01% |
| 1018 | Generic, Animals Amazon Forest      | 0.01% |
| 1019 | Generic, Animals Ambassador         | 0.01% |
| 1020 | Generic, Animals Antarctica         | 0.01% |
| 1021 | Generic, Animals Aquatic            | 0.01% |
| 1022 | Generic, Animals Asian              | 0.01% |
| 1023 | Generic, Animals Galapagos          | 0.01% |
| 1024 | Generic, Animals Savanna            | 0.01% |
| 1025 | Generic, Animals Unique             | 0.01% |
| 1026 | Generic, Animals Uniquely Adapted   | 0.01% |
| 1027 | Generic, Carnivore Endangered       | 0.01% |
| 1028 | Generic, Invertebrate Endangered    | 0.01% |
| 1029 | Invertebrate, Arachnid Endangered   | 0.01% |
| 1030 | Invertebrate, Beetle Burying        | 0.01% |
| 1031 | Invertebrate, Butterfly Endangered  | 0.01% |
| 1032 | Invertebrate, Butterfly Morpho      | 0.01% |

|      |                                             |       |
|------|---------------------------------------------|-------|
| 1033 | Invertebrate, Butterfly North American      | 0.01% |
| 1034 | Invertebrate, Centipedes                    | 0.01% |
| 1035 | Invertebrate, Clam Giant                    | 0.01% |
| 1036 | Invertebrate, Coral Soft                    | 0.01% |
| 1037 | Invertebrate, Crab Blue                     | 0.01% |
| 1038 | Invertebrate, Crab Coconut                  | 0.01% |
| 1039 | Invertebrate, Fireflies                     | 0.01% |
| 1040 | Invertebrate, Fly                           | 0.01% |
| 1041 | Invertebrate, Insect Lord Howe Island Stick | 0.01% |
| 1042 | Invertebrate, Jellyfish Moon                | 0.01% |
| 1043 | Invertebrate, Krill                         | 0.01% |
| 1044 | Invertebrate, Mussel                        | 0.01% |
| 1045 | Invertebrate, Native                        | 0.01% |
| 1046 | Invertebrate, Shrimp Mantis                 | 0.01% |
| 1047 | Invertebrate, Snail Sea                     | 0.01% |
| 1048 | Invertebrate, Squid Giant                   | 0.01% |
| 1049 | Mammalia, Mammal Australian                 | 0.01% |
| 1050 | Mammalia, Mammal Endangered                 | 0.01% |
| 1051 | Marsupialia, Marsupial Small                | 0.01% |
| 1052 | Marsupialia, Quoll                          | 0.01% |
| 1053 | Marsupialia, Wallaby Red-Necked             | 0.01% |
| 1054 | Perissodactyla, Rhinoceros Asian            | 0.01% |
| 1055 | Pisces, Arrowana Asian                      | 0.01% |
| 1056 | Pisces, Fish Archer                         | 0.01% |
| 1057 | Pisces, Fish Banggai Cardinal               | 0.01% |
| 1058 | Pisces, Fish Blue Tang                      | 0.01% |
| 1059 | Pisces, Fish Caribbean Reef                 | 0.01% |
| 1060 | Pisces, Fish Cold Water                     | 0.01% |
| 1061 | Pisces, Fish Deep Ocean                     | 0.01% |
| 1062 | Pisces, Fish Goliath Grouper                | 0.01% |
| 1063 | Pisces, Fish Halibut                        | 0.01% |
| 1064 | Pisces, Fish Local                          | 0.01% |
| 1065 | Pisces, Fish Lungfish                       | 0.01% |
| 1066 | Pisces, Fish Rock                           | 0.01% |
| 1067 | Pisces, Fish Sardine                        | 0.01% |
| 1068 | Pisces, Fish Tropical Freshwater            | 0.01% |
| 1069 | Pisces, Guitarfish Bowmouth                 | 0.01% |
| 1070 | Plankton, Plankton                          | 0.01% |
| 1071 | Primates, Cebids                            | 0.01% |
| 1072 | Primates, Gibbon White Handed               | 0.01% |
| 1073 | Primates, Large                             | 0.01% |
| 1074 | Primates, Lemur Collared Brown              | 0.01% |
| 1075 | Primates, Monkey Swamp Allen's              | 0.01% |
| 1076 | Primates, Monkey Titi                       | 0.01% |
| 1077 | Primates, Monkey Yellow-Tailed Woolly       | 0.01% |
| 1078 | Primates, Nocturnal                         | 0.01% |
| 1079 | Primates, Prosimian Nocturnal               | 0.01% |
| 1080 | Primates, Prosimians                        | 0.01% |

|      |                                              |       |
|------|----------------------------------------------|-------|
| 1081 | Primates, Tarsier                            | 0.01% |
| 1082 | Reptilia, Reptile Large                      | 0.01% |
| 1083 | Reptilia, Reptile South American             | 0.01% |
| 1084 | Reptilia, Reptile Venomous                   | 0.01% |
| 1085 | Rodentia, Rat Cloud                          | 0.01% |
| 1086 | Rodentia, Rodent Small                       | 0.01% |
| 1087 | Squamata, Anaconda Green                     | 0.01% |
| 1088 | Squamata, Boa Jamaican                       | 0.01% |
| 1089 | Squamata, Boa Rainbow                        | 0.01% |
| 1090 | Squamata, Gecko Day                          | 0.01% |
| 1091 | Squamata, Iguana Rhinoceros                  | 0.01% |
| 1092 | Squamata, Iguana Spiny Tailed                | 0.01% |
| 1093 | Squamata, Lizard Desert Horned               | 0.01% |
| 1094 | Squamata, Lizard Large                       | 0.01% |
| 1095 | Squamata, Lizard Small                       | 0.01% |
| 1096 | Squamata, Monitor Crocodile                  | 0.01% |
| 1097 | Squamata, Snake Colubrid                     | 0.01% |
| 1098 | Squamata, Snake Corn                         | 0.01% |
| 1099 | Squamata, Snake Cotton Mouth                 | 0.01% |
| 1100 | Squamata, Snake South American Non-Venomous) | 0.01% |
| 1101 | Amphibia, Frog Lake Titicaca                 | 0.01% |
| 1102 | Amphibia, Frog Neotropical                   | 0.01% |
| 1103 | Amphibia, Frog North American                | 0.01% |
| 1104 | Amphibia, Frog Red Eyed Tree                 | 0.01% |
| 1105 | Amphibia, Salamander Endangered              | 0.01% |
| 1106 | Artiodactyla, Antelope Asian                 | 0.01% |
| 1107 | Artiodactyla, Antelope Desert                | 0.01% |
| 1108 | Artiodactyla, Antelope Large                 | 0.01% |
| 1109 | Artiodactyla, Camel Dromedary                | 0.01% |
| 1110 | Artiodactyla, Caprines                       | 0.01% |
| 1111 | Artiodactyla, Cattle Wild                    | 0.01% |
| 1112 | Artiodactyla, Chevrotain                     | 0.01% |
| 1113 | Artiodactyla, Deer Mouse-Deer                | 0.01% |
| 1114 | Artiodactyla, Deer Sika                      | 0.01% |
| 1115 | Artiodactyla, Dik-Dik Kirks                  | 0.01% |
| 1116 | Artiodactyla, Goat Rocky Mountain            | 0.01% |
| 1117 | Artiodactyla, Pig Asian                      | 0.01% |
| 1118 | Artiodactyla, Pig Endangered                 | 0.01% |
| 1119 | Artiodactyla, Sheep Dall                     | 0.01% |
| 1120 | Artiodactyla, Sheep Domestic                 | 0.01% |
| 1121 | Aves, Barbet                                 | 0.01% |
| 1122 | Aves, Barbet, Bearded                        | 0.01% |
| 1123 | Aves, Bird Aquatic                           | 0.01% |
| 1124 | Aves, Bird Arctic                            | 0.01% |
| 1125 | Aves, Bird Colorful                          | 0.01% |
| 1126 | Aves, Bird Fairy Bluebird                    | 0.01% |
| 1127 | Aves, Bird Large                             | 0.01% |
| 1128 | Aves, Bird Large Flightless                  | 0.01% |

|      |                                      |       |
|------|--------------------------------------|-------|
| 1129 | Aves, Bird Lyre                      | 0.01% |
| 1130 | Aves, Bird Mynah                     | 0.01% |
| 1131 | Aves, Bird Of Prey Large             | 0.01% |
| 1132 | Aves, Bird Songbirds Endangered      | 0.01% |
| 1133 | Aves, Bird Songbirds Native          | 0.01% |
| 1134 | Aves, Bird Songbirds South American  | 0.01% |
| 1135 | Aves, Bird South American Rainforest | 0.01% |
| 1136 | Aves, Cormorant                      | 0.01% |
| 1137 | Aves, Crane Saurus                   | 0.01% |
| 1138 | Aves, Cuckoos                        | 0.01% |
| 1139 | Aves, Cuckoos Guira                  | 0.01% |
| 1140 | Aves, Curassow Wattled               | 0.01% |
| 1141 | Aves, Dove Socorro                   | 0.01% |
| 1142 | Aves, Duck West Indian Whistling     | 0.01% |
| 1143 | Aves, Duck White-Winged Wood         | 0.01% |
| 1144 | Aves, Eagle Bateluer                 | 0.01% |
| 1145 | Aves, Eagle Generic                  | 0.01% |
| 1146 | Aves, Galliformes                    | 0.01% |
| 1147 | Aves, Grouse Sage                    | 0.01% |
| 1148 | Aves, Hoatzin                        | 0.01% |
| 1149 | Aves, Honeycreeper                   | 0.01% |
| 1150 | Aves, Hornbill Endangered            | 0.01% |
| 1151 | Aves, Hornbill Great Indian          | 0.01% |
| 1152 | Aves, Hornbill Helmeted              | 0.01% |
| 1153 | Aves, Jays                           | 0.01% |
| 1154 | Aves, Jays Green                     | 0.01% |
| 1155 | Aves, Kestrel                        | 0.01% |
| 1156 | Aves, Lapwing                        | 0.01% |
| 1157 | Aves, Lorikeet Rainbow               | 0.01% |
| 1158 | Aves, Macaw Blue                     | 0.01% |
| 1159 | Aves, Oropendula                     | 0.01% |
| 1160 | Aves, Owl Northern Spotted           | 0.01% |
| 1161 | Aves, Parrot Grey                    | 0.01% |
| 1162 | Aves, Passerine South American       | 0.01% |
| 1163 | Aves, Pheasant Endangered            | 0.01% |
| 1164 | Aves, Pheasant Golden                | 0.01% |
| 1165 | Aves, Pheasant Palawan Peacock       | 0.01% |
| 1166 | Aves, Pigeon Tooth-Billed            | 0.01% |
| 1167 | Aves, Plover                         | 0.01% |
| 1168 | Aves, Plover Piping                  | 0.01% |
| 1169 | Aves, Pochard Baers                  | 0.01% |
| 1170 | Aves, Raptor North American          | 0.01% |
| 1171 | Aves, Roller Lilac Breasted          | 0.01% |
| 1172 | Aves, Screamer Crested               | 0.01% |
| 1173 | Aves, Starling                       | 0.01% |
| 1174 | Aves, Starling Emerald               | 0.01% |
| 1175 | Aves, Starling Gold Breasted         | 0.01% |
| 1176 | Aves, Stork White                    | 0.01% |

|      |                                           |       |
|------|-------------------------------------------|-------|
| 1177 | Aves, Tinamou                             | 0.01% |
| 1178 | Aves, Tragopan                            | 0.01% |
| 1179 | Aves, Turaco Lady Ross                    | 0.01% |
| 1180 | Aves, Vulture Egyptian                    | 0.01% |
| 1181 | Aves, Waterfowl North American            | 0.01% |
| 1182 | Aves, Weaver African                      | 0.01% |
| 1183 | Aves, Wren                                | 0.01% |
| 1184 | Carnivora, American                       | 0.01% |
| 1185 | Carnivora, Cat Big African                | 0.01% |
| 1186 | Carnivora, Cat Desert                     | 0.01% |
| 1187 | Carnivora, Cat Small Endangered           | 0.01% |
| 1188 | Carnivora, Dog Raccoon Japanese           | 0.01% |
| 1189 | Carnivora, Hyena Brown                    | 0.01% |
| 1190 | Carnivora, Hyena Striped                  | 0.01% |
| 1191 | Carnivora, Leopard Asian                  | 0.01% |
| 1192 | Carnivora, Pinniped Endangered            | 0.01% |
| 1193 | Carnivora, Skunk Striped                  | 0.01% |
| 1194 | Carnivora, Tayra                          | 0.01% |
| 1195 | Carnivora, Tiger South China              | 0.01% |
| 1196 | Carnivora, Walrus Pacific                 | 0.01% |
| 1197 | Carnivora, Wolf Ethiopian                 | 0.01% |
| 1198 | Carnivora, Wolf North American            | 0.01% |
| 1199 | Cetacea, Porpoise Yangtze Finless         | 0.01% |
| 1200 | Cetacea, Whale Fin                        | 0.01% |
| 1201 | Cetacea, Whale Gray                       | 0.01% |
| 1202 | Chelonia, Terrapin                        | 0.01% |
| 1203 | Chelonia, Terrapin Diamond Back           | 0.01% |
| 1204 | Chelonia, Tortoise African Spurred        | 0.01% |
| 1205 | Chelonia, Tortoise Indian Star            | 0.01% |
| 1206 | Chelonia, Turtle African                  | 0.01% |
| 1207 | Chelonia, Turtle Coahuilan Box            | 0.01% |
| 1208 | Chelonia, Turtle Diamond Back             | 0.01% |
| 1209 | Chelonia, Turtle North American           | 0.01% |
| 1210 | Chelonia, Turtle Roti Island Snake-Necked | 0.01% |
| 1211 | Chelonia, Turtle Soft Shell               | 0.01% |
| 1212 | Chelonia, Turtle South America            | 0.01% |
| 1213 | Chiroptera, Bat Fox Indian Flying         | 0.01% |
| 1214 | Chiroptera, Fox Indian Flying             | 0.01% |
| 1215 | Chondrichthyes, Ray Large                 | 0.01% |
| 1216 | Chondrichthyes, Ray Mobula                | 0.01% |
| 1217 | Chondrichthyes, Shark Angel               | 0.01% |
| 1218 | Chondrichthyes, Shark Endangered          | 0.01% |
| 1219 | Chondrichthyes, Shark Epauvette           | 0.01% |
| 1220 | Chondrichthyes, Shark Whitetip Reef       | 0.01% |
| 1221 | Crocodylia, Caiman Black                  | 0.01% |
| 1222 | Crocodylia, Crocodile Dwarf               | 0.01% |
| 1223 | Crocodylia, Crocodile Philippine          | 0.01% |
| 1224 | Crocodylia, Crocodilian Small             | 0.01% |

|      |                                   |       |
|------|-----------------------------------|-------|
| 1225 | Generic, Animals Charismatic      | 0.01% |
| 1226 | Generic, Animals Deep Ocean       | 0.01% |
| 1227 | Generic, Animals Endemic          | 0.01% |
| 1228 | Generic, Animals Exotic           | 0.01% |
| 1229 | Generic, Animals Malagasy         | 0.01% |
| 1230 | Generic, Animals Nocturnal        | 0.01% |
| 1231 | Generic, Animals Popular          | 0.01% |
| 1232 | Generic, Aquatic Species          | 0.01% |
| 1233 | Generic, Carnivore African        | 0.01% |
| 1234 | Generic, Carnivore South American | 0.01% |
| 1235 | Generic, Endangered Species       | 0.01% |
| 1236 | Insectivora, Insectivore          | 0.01% |
| 1237 | Invertebrate, Centipede Giant     | 0.01% |
| 1238 | Invertebrate, Cricket             | 0.01% |
| 1239 | Invertebrate, Cucumber Sea        | 0.01% |
| 1240 | Invertebrate, Earthworm           | 0.01% |
| 1241 | Invertebrate, Insect Pollinating  | 0.01% |
| 1242 | Invertebrate, Insect Stick        | 0.01% |
| 1243 | Invertebrate, Ladybug             | 0.01% |
| 1244 | Invertebrate, Millipedes Giant    | 0.01% |
| 1245 | Invertebrate, Moth Luna           | 0.01% |
| 1246 | Invertebrate, Scorpion Emperor    | 0.01% |
| 1247 | Invertebrate, Slug Blue Sea       | 0.01% |
| 1248 | Invertebrate, Sponge              | 0.01% |
| 1249 | Mammalia, Mammal African Large    | 0.01% |
| 1250 | Mammalia, Mammal Desert           | 0.01% |
| 1251 | Marsupialia, Koala Queensland     | 0.01% |
| 1252 | Marsupialia, Marsupial Endangered | 0.01% |
| 1253 | Marsupialia, Numbat               | 0.01% |
| 1254 | Marsupialia, Wallaby Tammar       | 0.01% |
| 1255 | Marsupialia, Wallaroo             | 0.01% |
| 1256 | Perissodactyla, Onager            | 0.01% |
| 1257 | Perissodactyla, Tapir Asian       | 0.01% |
| 1258 | Pisces, Fish African              | 0.01% |
| 1259 | Pisces, Fish Anchovy              | 0.01% |
| 1260 | Pisces, Fish Barracuda            | 0.01% |
| 1261 | Pisces, Fish Blob                 | 0.01% |
| 1262 | Pisces, Fish Blow                 | 0.01% |
| 1263 | Pisces, Fish Bluegill             | 0.01% |
| 1264 | Pisces, Fish Bony                 | 0.01% |
| 1265 | Pisces, Fish Butterflyfish        | 0.01% |
| 1266 | Pisces, Fish Darter               | 0.01% |
| 1267 | Pisces, Fish Drum Red             | 0.01% |
| 1268 | Pisces, Fish Eel Garden           | 0.01% |
| 1269 | Pisces, Fish Eel Wolf             | 0.01% |
| 1270 | Pisces, Fish Flying               | 0.01% |
| 1271 | Pisces, Fish Large                | 0.01% |
| 1272 | Pisces, Fish Mudskipper           | 0.01% |

|      |                                        |       |
|------|----------------------------------------|-------|
| 1273 | Pisces, Fish Rainbow Trout             | 0.01% |
| 1274 | Pisces, Fish Rainbowfish               | 0.01% |
| 1275 | Pisces, Fish Schooling                 | 0.01% |
| 1276 | Pisces, Fish Sea Bass                  | 0.01% |
| 1277 | Pisces, Fish Sheepshead                | 0.01% |
| 1278 | Pisces, Fish South American Freshwater | 0.01% |
| 1279 | Pisces, Fish Threatened                | 0.01% |
| 1280 | Pisces, Fish Walleye                   | 0.01% |
| 1281 | Pisces, Fish Wrasse                    | 0.01% |
| 1282 | Pisces, Gar                            | 0.01% |
| 1283 | Primates, Baboon Gelada                | 0.01% |
| 1284 | Primates, Baboon Old World             | 0.01% |
| 1285 | Primates, Gorilla Cross River          | 0.01% |
| 1286 | Primates, Langur Francois              | 0.01% |
| 1287 | Primates, Macaque Sulawesi             | 0.01% |
| 1288 | Primates, Mangabeys                    | 0.01% |
| 1289 | Primates, Marmoset Goeldi's            | 0.01% |
| 1290 | Primates, Monkey Angolan Colobus       | 0.01% |
| 1291 | Primates, Monkey Bald Uakari           | 0.01% |
| 1292 | Primates, Monkey Capuchin              | 0.01% |
| 1293 | Primates, Monkey Wolf Guenon           | 0.01% |
| 1294 | Primates, Prosimian Endangered         | 0.01% |
| 1295 | Primates, Rainforest                   | 0.01% |
| 1296 | Reptilia, Reptile African              | 0.01% |
| 1297 | Reptilia, Reptile Asian                | 0.01% |
| 1298 | Reptilia, Reptile Desert               | 0.01% |
| 1299 | Reptilia, Reptile North American       | 0.01% |
| 1300 | Reptilia, Reptile Rainforest           | 0.01% |
| 1301 | Rodentia, Cavy                         | 0.01% |
| 1302 | Rodentia, Pig Guinea                   | 0.01% |
| 1303 | Rodentia, Rodent Endangered            | 0.01% |
| 1304 | Rodentia, Squirrel Prevost             | 0.01% |
| 1305 | Squamata, Anaconda Yellow              | 0.01% |
| 1306 | Squamata, Cobra Spectacled             | 0.01% |
| 1307 | Squamata, Galliwasp Haitian            | 0.01% |
| 1308 | Squamata, Gecko Crested                | 0.01% |
| 1309 | Squamata, Gecko Henckel Leaf Tailed    | 0.01% |
| 1310 | Squamata, Gecko Leopard                | 0.01% |
| 1311 | Squamata, Iguana Cyclurid              | 0.01% |
| 1312 | Squamata, Lizard Crocodile             | 0.01% |
| 1313 | Squamata, Lizard South American        | 0.01% |
| 1314 | Squamata, Lizard Southern Alligator    | 0.01% |
| 1315 | Squamata, Lizard Threatened            | 0.01% |
| 1316 | Squamata, Lizard Tropical              | 0.01% |
| 1317 | Squamata, Megafauna Charismatic        | 0.01% |
| 1318 | Squamata, Monitor Emerald Tree         | 0.01% |
| 1319 | Squamata, Monitor Tree                 | 0.01% |
| 1320 | Squamata, Sea Snake                    | 0.01% |

|      |                                                 |       |
|------|-------------------------------------------------|-------|
| 1321 | Squamata, Snake Adder Puff                      | 0.01% |
| 1322 | Squamata, Snake Asian                           | 0.01% |
| 1323 | Squamata, Snake Black Rat                       | 0.01% |
| 1324 | Squamata, Snake Desert                          | 0.01% |
| 1325 | Squamata, Snake Diamond Back Rattle             | 0.01% |
| 1326 | Squamata, Snake Eastern Diamondback Rattlesnake | 0.01% |
| 1327 | Squamata, Snake Milk Snake                      | 0.01% |
| 1328 | Squamata, Snake North America                   | 0.01% |
| 1329 | Squamata, Snake Viper Armenian                  | 0.01% |
| 1330 | Squamata, Snake Viper Eyelash                   | 0.01% |
| 1331 | Squamata, Snake Water                           | 0.01% |
| 1332 | Xenarthra, Pangolin Tree White Bellied          | 0.01% |
| 1333 | Xenarthra, Sloth Hoffmann's Two-Toed            | 0.01% |
| 1334 | Xenarthra, Sloth Pygmy Three-Toed               | 0.01% |
| 1335 | Amphibia, Amphibian Central America             | <.01% |
| 1336 | Amphibia, Amphibian Colorful                    | <.01% |
| 1337 | Amphibia, Chytrid Fungus                        | <.01% |
| 1338 | Amphibia, Frog Asian                            | <.01% |
| 1339 | Amphibia, Frog Clawed                           | <.01% |
| 1340 | Amphibia, Frog Effected Chytrid                 | <.01% |
| 1341 | Amphibia, Frog Mantella                         | <.01% |
| 1342 | Amphibia, Frog Mountain Chicken                 | <.01% |
| 1343 | Amphibia, Frog Purple                           | <.01% |
| 1344 | Amphibia, Frog Threatened Species               | <.01% |
| 1345 | Amphibia, Hellbender Ozark                      | <.01% |
| 1346 | Amphibia, Mantella Golden                       | <.01% |
| 1347 | Amphibia, Salamander Barton Springs             | <.01% |
| 1348 | Amphibia, Salamander Green                      | <.01% |
| 1349 | Amphibia, Salamander New                        | <.01% |
| 1350 | Amphibia, Salamander Plethodon                  | <.01% |
| 1351 | Amphibia, Salamander Tiger                      | <.01% |
| 1352 | Amphibia, Toad Blombergs                        | <.01% |
| 1353 | Amphibia, Toad Stubfoot                         | <.01% |
| 1354 | Artiodactyla, Antelope Forest                   | <.01% |
| 1355 | Artiodactyla, Antelope Tibetan                  | <.01% |
| 1356 | Artiodactyla, Bighorn Desert                    | <.01% |
| 1357 | Artiodactyla, Bison Wood                        | <.01% |
| 1358 | Artiodactyla, Bovidae                           | <.01% |
| 1359 | Artiodactyla, Bovidae Endangered                | <.01% |
| 1360 | Artiodactyla, Bovines                           | <.01% |
| 1361 | Artiodactyla, Camel Wild Bactrian               | <.01% |
| 1362 | Artiodactyla, Cattle Ankole                     | <.01% |
| 1363 | Artiodactyla, Cattle Endangered                 | <.01% |
| 1364 | Artiodactyla, Cattle Watusi                     | <.01% |
| 1365 | Artiodactyla, Cervid                            | <.01% |
| 1366 | Artiodactyla, Chevrotain Malayan                | <.01% |
| 1367 | Artiodactyla, Cow Domestic                      | <.01% |
| 1368 | Artiodactyla, Deer African                      | <.01% |

|      |                                      |       |
|------|--------------------------------------|-------|
| 1369 | Artiodactyla, Deer Axis              | <.01% |
| 1370 | Artiodactyla, Deer Brocket           | <.01% |
| 1371 | Artiodactyla, Deer Endangered        | <.01% |
| 1372 | Artiodactyla, Deer Huemul            | <.01% |
| 1373 | Artiodactyla, Deer Key               | <.01% |
| 1374 | Artiodactyla, Deer Large             | <.01% |
| 1375 | Artiodactyla, Deer Small             | <.01% |
| 1376 | Proboscidea, Elephant Indian         | <.01% |
| 1377 | Artiodactyla, Elk American           | <.01% |
| 1378 | Artiodactyla, Gazelle Endangered     | <.01% |
| 1379 | Artiodactyla, Gazelle Mountain       | <.01% |
| 1380 | Artiodactyla, Goat American Pygmy    | <.01% |
| 1381 | Artiodactyla, Hoof Endangered        | <.01% |
| 1382 | Artiodactyla, Mouflon                | <.01% |
| 1383 | Artiodactyla, Nilgai                 | <.01% |
| 1384 | Artiodactyla, Pig African            | <.01% |
| 1385 | Artiodactyla, Pig Babirusa           | <.01% |
| 1386 | Artiodactyla, Pig Bearded            | <.01% |
| 1387 | Artiodactyla, Pig Exotic             | <.01% |
| 1388 | Artiodactyla, Pig Javan Warty        | <.01% |
| 1389 | Artiodactyla, Puku                   | <.01% |
| 1390 | Artiodactyla, Sheep Wild             | <.01% |
| 1391 | Artiodactyla, Tamaraw                | <.01% |
| 1392 | Artiodactyla, Topi                   | <.01% |
| 1393 | Artiodactyla, Tragelaphines          | <.01% |
| 1394 | Artiodactyla, Ungulate Asian         | <.01% |
| 1395 | Artiodactyla, Ungulate Endangered    | <.01% |
| 1396 | Artiodactyla, Ungulate North America | <.01% |
| 1397 | Artiodactyla, Ungulate South America | <.01% |
| 1398 | Artiodactyla, Zebu                   | <.01% |
| 1399 | Aves, Auklet                         | <.01% |
| 1400 | Aves, Bird Amazon Rainforest         | <.01% |
| 1401 | Aves, Bird Asian Song                | <.01% |
| 1402 | Aves, Bird Compatible Aviary         | <.01% |
| 1403 | Aves, Bird Critically Endangered     | <.01% |
| 1404 | Aves, Bird European                  | <.01% |
| 1405 | Aves, Bird Flightless                | <.01% |
| 1406 | Aves, Bird Forest                    | <.01% |
| 1407 | Aves, Bird Large Ground              | <.01% |
| 1408 | Aves, Bird Mousebird                 | <.01% |
| 1409 | Aves, Bird Native                    | <.01% |
| 1410 | Aves, Bird Of Prey Rehabilitated     | <.01% |
| 1411 | Aves, Bird Pelagic                   | <.01% |
| 1412 | Aves, Bird Pollinator                | <.01% |
| 1413 | Aves, Bird Predatory                 | <.01% |
| 1414 | Aves, Bird Savanna                   | <.01% |
| 1415 | Aves, Bird Shore Endangered          | <.01% |
| 1416 | Aves, Bird Songbirds Colorful        | <.01% |

|      |                                  |       |
|------|----------------------------------|-------|
| 1417 | Aves, Bird South American        | <.01% |
| 1418 | Aves, Bird Sunbird               | <.01% |
| 1419 | Aves, Bird Terrestrial           | <.01% |
| 1420 | Aves, Bird Threatened            | <.01% |
| 1421 | Aves, Bird Tropical Rainforest   | <.01% |
| 1422 | Aves, Bird White-Eyes            | <.01% |
| 1423 | Aves, Bird White-Eyes Golden     | <.01% |
| 1424 | Aves, Birds Large                | <.01% |
| 1425 | Aves, Bluebird Fairy             | <.01% |
| 1426 | Aves, Budgerigar                 | <.01% |
| 1427 | Aves, Buzzard                    | <.01% |
| 1428 | Aves, Cockatiel                  | <.01% |
| 1429 | Aves, Cockatoo Leadbeater        | <.01% |
| 1430 | Aves, Cockatoo Moluccan          | <.01% |
| 1431 | Aves, Condor Endangered          | <.01% |
| 1432 | Aves, Condor North American      | <.01% |
| 1433 | Aves, Crane Siberian             | <.01% |
| 1434 | Aves, Curassow Endangered        | <.01% |
| 1435 | Aves, Curassow Helmeted          | <.01% |
| 1436 | Aves, Duck Dabbling              | <.01% |
| 1437 | Aves, Duck Harlequin             | <.01% |
| 1438 | Aves, Duck Mallard               | <.01% |
| 1439 | Aves, Duck Sea                   | <.01% |
| 1440 | Aves, Duck White-Faced Whistling | <.01% |
| 1441 | Aves, Eagle Fish                 | <.01% |
| 1442 | Aves, Eider Spectacled           | <.01% |
| 1443 | Aves, Finch Galapagos            | <.01% |
| 1444 | Aves, Finch Gouldian             | <.01% |
| 1445 | Aves, Flamingo Endangered        | <.01% |
| 1446 | Aves, Fowl Guinea                | <.01% |
| 1447 | Aves, Geese Canadian             | <.01% |
| 1448 | Aves, Guan Horned                | <.01% |
| 1449 | Aves, Guineafowl Helmeted        | <.01% |
| 1450 | Aves, Hawk Harris                | <.01% |
| 1451 | Aves, Herons Blue                | <.01% |
| 1452 | Aves, Hornbill Abyssinian Ground | <.01% |
| 1453 | Aves, Hornbill Arboreal          | <.01% |
| 1454 | Aves, Hornbill Great             | <.01% |
| 1455 | Aves, Hornbill Wreathed          | <.01% |
| 1456 | Aves, Hummingbird Bee            | <.01% |
| 1457 | Aves, Ibis Giant                 | <.01% |
| 1458 | Aves, Ibis Northern Bald         | <.01% |
| 1459 | Aves, Ibis Sacred                | <.01% |
| 1460 | Aves, I'Iwi                      | <.01% |
| 1461 | Aves, Jays Florida Scrub         | <.01% |
| 1462 | Aves, Macaw Blue and Yellow      | <.01% |
| 1463 | Aves, Macaw Endangered           | <.01% |
| 1464 | Aves, Magpie                     | <.01% |

|      |                                |       |
|------|--------------------------------|-------|
| 1465 | Aves, Magpie Java Green        | <.01% |
| 1466 | Aves, Megapode                 | <.01% |
| 1467 | Aves, Owl Eastern Screech      | <.01% |
| 1468 | Aves, Owl Elf                  | <.01% |
| 1469 | Aves, Owl Endangered           | <.01% |
| 1470 | Aves, Owl Large                | <.01% |
| 1471 | Aves, Owl Northern Saw-Whet    | <.01% |
| 1472 | Aves, Owl Old World            | <.01% |
| 1473 | Aves, Owl Short-Eared          | <.01% |
| 1474 | Aves, Owl Western Screech      | <.01% |
| 1475 | Aves, Parrot African           | <.01% |
| 1476 | Aves, Parrot Australian        | <.01% |
| 1477 | Aves, Parrot Caribbean         | <.01% |
| 1478 | Aves, Parrot Puerto Rican      | <.01% |
| 1479 | Aves, Parrot Small             | <.01% |
| 1480 | Aves, Parrot St. Vincents      | <.01% |
| 1481 | Aves, Parrot Tropical          | <.01% |
| 1482 | Aves, Passerine Asian          | <.01% |
| 1483 | Aves, Passerine North American | <.01% |
| 1484 | Aves, Peafowl Congo            | <.01% |
| 1485 | Aves, Pelican Brown            | <.01% |
| 1486 | Aves, Pelican Great White      | <.01% |
| 1487 | Aves, Pelican Pink-Backed      | <.01% |
| 1488 | Aves, Penguin Adelie           | <.01% |
| 1489 | Aves, Penguin Endangered       | <.01% |
| 1490 | Aves, Penguin South American   | <.01% |
| 1491 | Aves, Penguin Yellow-Eyed      | <.01% |
| 1492 | Aves, Pheasant Himalayan Monal | <.01% |
| 1493 | Aves, Pheasant Reeve's         | <.01% |
| 1494 | Aves, Pigeon Pink              | <.01% |
| 1495 | Aves, Plover Snowy             | <.01% |
| 1496 | Aves, Puffin Atlantic          | <.01% |
| 1497 | Aves, Puffin Tufted            | <.01% |
| 1498 | Aves, Roller Blue Bellied      | <.01% |
| 1499 | Aves, Sandpiper                | <.01% |
| 1500 | Aves, Sparrow Grasshopper      | <.01% |
| 1501 | Aves, Spoonbill African        | <.01% |
| 1502 | Aves, Spoonbill Sandpiper      | <.01% |
| 1503 | Aves, Starling Superb          | <.01% |
| 1504 | Aves, Starling Violet Backed   | <.01% |
| 1505 | Aves, Stork African            | <.01% |
| 1506 | Aves, Stork Endangered         | <.01% |
| 1507 | Aves, Stork European White     | <.01% |
| 1508 | Aves, Swan Black               | <.01% |
| 1509 | Aves, Tanager Paradise         | <.01% |
| 1510 | Aves, Tragopan Cabot's         | <.01% |
| 1511 | Aves, Turaco Great Blue        | <.01% |
| 1512 | Aves, Turaco Violaceous        | <.01% |

|      |                                        |       |
|------|----------------------------------------|-------|
| 1513 | Aves, Turaco White Cheek               | <.01% |
| 1514 | Aves, Vulture Black Eurasian           | <.01% |
| 1515 | Aves, Vulture Griffon                  | <.01% |
| 1516 | Aves, Warbler                          | <.01% |
| 1517 | Aves, Waterfowl African                | <.01% |
| 1518 | Carnivora, Canid Endangered            | <.01% |
| 1519 | Carnivora, Canid Large                 | <.01% |
| 1520 | Carnivora, Cat Geoffroy's              | <.01% |
| 1521 | Carnivora, Cat Serval                  | <.01% |
| 1522 | Carnivora, Cat Small African           | <.01% |
| 1523 | Carnivora, Cat Small Asian             | <.01% |
| 1524 | Carnivora, Cat Small Wild              | <.01% |
| 1525 | Carnivora, Felid Endangered            | <.01% |
| 1526 | Carnivora, Fox Eastern America Red     | <.01% |
| 1527 | Carnivora, Fox Kit                     | <.01% |
| 1528 | Carnivora, Genet                       | <.01% |
| 1529 | Carnivora, Lion Asian                  | <.01% |
| 1530 | Carnivora, Lynx Iberian                | <.01% |
| 1531 | Carnivora, Otter Spot Necked           | <.01% |
| 1532 | Carnivora, Raccoon South American      | <.01% |
| 1533 | Carnivora, Seal Bearded                | <.01% |
| 1534 | Carnivora, Seal Grey                   | <.01% |
| 1535 | Carnivora, Seal Northern Fur           | <.01% |
| 1536 | Carnivora, Seal Ringed                 | <.01% |
| 1537 | Carnivora, Tiger Indochinese           | <.01% |
| 1538 | Carnivora, Wolf Timber                 | <.01% |
| 1539 | Carnivora, Wolverine North American    | <.01% |
| 1540 | Cetacea, Dolphin Endangered            | <.01% |
| 1541 | Cetacea, Dolphin Irrawaddy             | <.01% |
| 1542 | Cetacea, Dolphin Pacific Whited-Sided  | <.01% |
| 1543 | Cetacea, Whale Pilot                   | <.01% |
| 1544 | Cetacea, Whale Right                   | <.01% |
| 1545 | Chelonia, Aquatic Endangered Turtles   | <.01% |
| 1546 | Chelonia, Chelonian Native             | <.01% |
| 1547 | Chelonia, Terrapin Northern River      | <.01% |
| 1548 | Chelonia, Tortoise Burmese Star        | <.01% |
| 1549 | Chelonia, Tortoise Flat-Backed Spider  | <.01% |
| 1550 | Chelonia, Tortoise Red-Footed          | <.01% |
| 1551 | Chelonia, Tortoise Sulcata             | <.01% |
| 1552 | Chelonia, Tortoise Threatened          | <.01% |
| 1553 | Chelonia, Turtle Batagur               | <.01% |
| 1554 | Chelonia, Turtle Black-Breasted Leaf   | <.01% |
| 1555 | Chelonia, Turtle Galapagos             | <.01% |
| 1556 | Chelonia, Turtle Madagascar Big-Headed | <.01% |
| 1557 | Chelonia, Turtle Malaysian Giant       | <.01% |
| 1558 | Chelonia, Turtle Marine                | <.01% |
| 1559 | Chelonia, Turtle Pig-Nosed             | <.01% |
| 1560 | Chelonia, Turtle Pond                  | <.01% |

|      |                                                 |       |
|------|-------------------------------------------------|-------|
| 1561 | Chelonia, Turtle Rescued Sea                    | <.01% |
| 1562 | Chelonia, Turtle Threatened                     | <.01% |
| 1563 | Chiroptera, Bat Little Brown                    | <.01% |
| 1564 | Chiroptera, Bat North American Endangered       | <.01% |
| 1565 | Chiroptera, Bat Rodrigues Flying Fox            | <.01% |
| 1566 | Chiroptera, Microbat Leaf Nose                  | <.01% |
| 1567 | Chondrichthyes, Shark Bonnethead                | <.01% |
| 1568 | Chondrichthyes, Shark Bull                      | <.01% |
| 1569 | Chondrichthyes, Shark Cat                       | <.01% |
| 1570 | Chondrichthyes, Shark Galapagos                 | <.01% |
| 1571 | Chondrichthyes, Shark Goblin                    | <.01% |
| 1572 | Chondrichthyes, Shark Horn                      | <.01% |
| 1573 | Chondrichthyes, Shark Leopard                   | <.01% |
| 1574 | Chondrichthyes, Shark Mako Shortfin             | <.01% |
| 1575 | Chondrichthyes, Shark Pelagic                   | <.01% |
| 1576 | Chondrichthyes, Shark Reef Species              | <.01% |
| 1577 | Chondrichthyes, Stingray Freshwater             | <.01% |
| 1578 | Chondrichthyes, Stingray Southern               | <.01% |
| 1579 | Crocodylia, Crocodile South American            | <.01% |
| 1580 | Crocodylia, Crocodile West African Dwarf        | <.01% |
| 1581 | Crocodylia, Crocodilian Large                   | <.01% |
| 1582 | Generic, All Species Currently In Zoos/Aqs      | <.01% |
| 1583 | Generic, Animals African Savanna                | <.01% |
| 1584 | Generic, Animals Cold Weather                   | <.01% |
| 1585 | Generic, Animals Dangerous                      | <.01% |
| 1586 | Generic, Animals Decomposer                     | <.01% |
| 1587 | Generic, Animals European                       | <.01% |
| 1588 | Generic, Animals Grassland                      | <.01% |
| 1589 | Generic, Animals Mountain                       | <.01% |
| 1590 | Generic, Animals Savannah                       | <.01% |
| 1591 | Generic, Animals Successfully Managed in Zoos   | <.01% |
| 1592 | Generic, Animals Tide Pool                      | <.01% |
| 1593 | Generic, Carnivore Asian                        | <.01% |
| 1594 | Generic, Carnivore North American               | <.01% |
| 1595 | Generic, Endangered Terrestrial Invertebrate    | <.01% |
| 1596 | Generic, Species Prairie Animal                 | <.01% |
| 1597 | Insectivora, Hedgehog Lesser Tenrec             | <.01% |
| 1598 | Insectivora, Mole Star Nose                     | <.01% |
| 1599 | Invertebrate, Abalone                           | <.01% |
| 1600 | Invertebrate, Arthropod                         | <.01% |
| 1601 | Invertebrate, Bear Water                        | <.01% |
| 1602 | Invertebrate, Beetle Goliath                    | <.01% |
| 1603 | Invertebrate, Beetle Hercules                   | <.01% |
| 1604 | Invertebrate, Beetle Rhinoceros                 | <.01% |
| 1605 | Invertebrate, Butterfly Birdwing                | <.01% |
| 1606 | Invertebrate, Butterfly Blue                    | <.01% |
| 1607 | Invertebrate, Butterfly Rainforest              | <.01% |
| 1608 | Invertebrate, Butterfly Skipper Laguna Mountain | <.01% |

|      |                                         |       |
|------|-----------------------------------------|-------|
| 1609 | Invertebrate, Butterfly South American  | <.01% |
| 1610 | Invertebrate, Butterfly Swallowtail     | <.01% |
| 1611 | Invertebrate, Butterfly Tropical        | <.01% |
| 1612 | Invertebrate, Caterpillar               | <.01% |
| 1613 | Invertebrate, Conch                     | <.01% |
| 1614 | Invertebrate, Coral Endangered          | <.01% |
| 1615 | Invertebrate, Coral Pillar              | <.01% |
| 1616 | Invertebrate, Coral Staghorn            | <.01% |
| 1617 | Invertebrate, Crab King                 | <.01% |
| 1618 | Invertebrate, Crab Snow                 | <.01% |
| 1619 | Invertebrate, Dollar Sand               | <.01% |
| 1620 | Invertebrate, Insect Metalmark          | <.01% |
| 1621 | Invertebrate, Lobster Spiny             | <.01% |
| 1622 | Invertebrate, Millipedes Giant African  | <.01% |
| 1623 | Invertebrate, Moth Barberry Carpet      | <.01% |
| 1624 | Invertebrate, Scallop                   | <.01% |
| 1625 | Invertebrate, Skipper Field             | <.01% |
| 1626 | Invertebrate, Slug                      | <.01% |
| 1627 | Invertebrate, Snail Apple               | <.01% |
| 1628 | Invertebrate, Snail Land                | <.01% |
| 1629 | Invertebrate, Spider Black Widow        | <.01% |
| 1630 | Invertebrate, Spider Orb Weaving        | <.01% |
| 1631 | Invertebrate, Spider Widow              | <.01% |
| 1632 | Invertebrate, Spider Wolf               | <.01% |
| 1633 | Invertebrate, Squid Vampire             | <.01% |
| 1634 | Invertebrate, Starfish Basket           | <.01% |
| 1635 | Invertebrate, Tarantula Bird Eating     | <.01% |
| 1636 | Invertebrate, Tarantula Chilean         | <.01% |
| 1637 | Lagomorpha, Jackrabbit                  | <.01% |
| 1638 | Mammalia, Edentates                     | <.01% |
| 1639 | Marsupialia, Marsupial Carnivorous      | <.01% |
| 1640 | Marsupialia, Possum Leadbeater's        | <.01% |
| 1641 | Marsupialia, Tiger Quoll                | <.01% |
| 1642 | Marsupialia, Wallaby Parma              | <.01% |
| 1643 | Marsupialia, Wallaby Yellow-Footed Rock | <.01% |
| 1644 | Perissodactyla, Equid Wild              | <.01% |
| 1645 | Perissodactyla, Horse Domestic          | <.01% |
| 1646 | Perissodactyla, Tapir Brazilian         | <.01% |
| 1647 | Perissodactyla, Tapir Mountain          | <.01% |
| 1648 | Pisces, Bass Giant Sea                  | <.01% |
| 1649 | Pisces, Bass Striped                    | <.01% |
| 1650 | Pisces, Cichlid Lake Tanganyika         | <.01% |
| 1651 | Pisces, Drum Black                      | <.01% |
| 1652 | Pisces, Fish African Fresh Water        | <.01% |
| 1653 | Pisces, Fish Aquacultured               | <.01% |
| 1654 | Pisces, Fish Arctic                     | <.01% |
| 1655 | Pisces, Fish Asian                      | <.01% |
| 1656 | Pisces, Fish Australian Lungfish        | <.01% |

|      |                                        |       |
|------|----------------------------------------|-------|
| 1657 | Pisces, Fish Cartilaginous             | <.01% |
| 1658 | Pisces, Fish Catfish                   | <.01% |
| 1659 | Pisces, Fish Colorful                  | <.01% |
| 1660 | Pisces, Fish Convict Cichlid           | <.01% |
| 1661 | Pisces, Fish Dragon                    | <.01% |
| 1662 | Pisces, Fish Estuarine                 | <.01% |
| 1663 | Pisces, Fish Great Lakes               | <.01% |
| 1664 | Pisces, Fish Guppy                     | <.01% |
| 1665 | Pisces, Fish Indo-Pacific Reef         | <.01% |
| 1666 | Pisces, Fish Jack                      | <.01% |
| 1667 | Pisces, Fish Mahi Mahi                 | <.01% |
| 1668 | Pisces, Fish Marlin                    | <.01% |
| 1669 | Pisces, Fish North American Freshwater | <.01% |
| 1670 | Pisces, Fish Northern Pike             | <.01% |
| 1671 | Pisces, Fish Open Ocean                | <.01% |
| 1672 | Pisces, Fish Pipe                      | <.01% |
| 1673 | Pisces, Fish Rainforest                | <.01% |
| 1674 | Pisces, Fish Small                     | <.01% |
| 1675 | Pisces, Fish South Pacific Reef        | <.01% |
| 1676 | Pisces, Fish Stonefish                 | <.01% |
| 1677 | Pisces, Fish Tetra                     | <.01% |
| 1678 | Pisces, Fish Tropical Marine           | <.01% |
| 1679 | Pisces, Fish White                     | <.01% |
| 1680 | Pisces, Fish Yellow Tang               | <.01% |
| 1681 | Pisces, Fish Zebra                     | <.01% |
| 1682 | Pisces, Garibaldi                      | <.01% |
| 1683 | Pisces, Lookdown                       | <.01% |
| 1684 | Pisces, Menhaden                       | <.01% |
| 1685 | Pisces, Pupfish                        | <.01% |
| 1686 | Pisces, Sawfish Smalltooth             | <.01% |
| 1687 | Pisces, Sunfish Freshwater             | <.01% |
| 1688 | Pisces, Tarpon                         | <.01% |
| 1689 | Plankton, Zooplankton                  | <.01% |
| 1690 | Primates, Hamadryas                    | <.01% |
| 1691 | Primates, Lemur Black                  | <.01% |
| 1692 | Primates, Lemur Crowned                | <.01% |
| 1693 | Primates, Lemur Golden Bamboo          | <.01% |
| 1694 | Primates, Lemur Madagascar             | <.01% |
| 1695 | Primates, Loris Slender                | <.01% |
| 1696 | Primates, Marmoset Buffy-Headed        | <.01% |
| 1697 | Primates, Marmoset Geoffrey's          | <.01% |
| 1698 | Primates, Monkey Asian Rainforest      | <.01% |
| 1699 | Primates, Monkey Black-Handed Spider   | <.01% |
| 1700 | Primates, Monkey Colobus Red           | <.01% |
| 1701 | Primates, Monkey Dusky Leaf            | <.01% |
| 1702 | Primates, Monkey Endangered            | <.01% |
| 1703 | Primates, Monkey Golden Snub-Nosed     | <.01% |
| 1704 | Primates, Monkey Gray Langur           | <.01% |

|      |                                          |       |
|------|------------------------------------------|-------|
| 1705 | Primates, Monkey Patas                   | <.01% |
| 1706 | Primates, Monkey Prehensile Tail         | <.01% |
| 1707 | Primates, Monkey Threatened              | <.01% |
| 1708 | Primates, Monkey Vervet                  | <.01% |
| 1709 | Primates, Monkey White-Faced Saki        | <.01% |
| 1710 | Primates, Primate Small African          | <.01% |
| 1711 | Primates, Primates Endangered            | <.01% |
| 1712 | Primates, Rescued                        | <.01% |
| 1713 | Primates, Tamarin Endangered             | <.01% |
| 1714 | Primates, Tamarin Lion                   | <.01% |
| 1715 | Reptilia, Reptile Malagasy               | <.01% |
| 1716 | Reptilia, Reptile Small                  | <.01% |
| 1717 | Rodentia, Beaver North American          | <.01% |
| 1718 | Rodentia, Chuck Wood                     | <.01% |
| 1719 | Rodentia, Mouse Perdido Key Beach        | <.01% |
| 1720 | Rodentia, Porcupine South America        | <.01% |
| 1721 | Rodentia, Rat Gambian Pouched            | <.01% |
| 1722 | Sirenia, Cow Sea                         | <.01% |
| 1723 | Sirenia, Manatee West Indian             | <.01% |
| 1724 | Squamata, Boa Madagascar Tree            | <.01% |
| 1725 | Squamata, Boa Round Island               | <.01% |
| 1726 | Squamata, Chameleon Parson's             | <.01% |
| 1727 | Squamata, Cobra Red Spitting             | <.01% |
| 1728 | Squamata, Iguana Green                   | <.01% |
| 1729 | Squamata, Iguana Jamaican                | <.01% |
| 1730 | Squamata, Lizard Agama                   | <.01% |
| 1731 | Squamata, Lizard Arboreal Alligator      | <.01% |
| 1732 | Squamata, Lizard Australian              | <.01% |
| 1733 | Squamata, Lizard Beaded                  | <.01% |
| 1734 | Squamata, Lizard Big                     | <.01% |
| 1735 | Squamata, Lizard Chinese Water Dragon    | <.01% |
| 1736 | Squamata, Lizard Goanna                  | <.01% |
| 1737 | Squamata, Lizard Mexican Beaded          | <.01% |
| 1738 | Squamata, Lizard Monitor Green Tree      | <.01% |
| 1739 | Squamata, Lizard Spiny-Tailed            | <.01% |
| 1740 | Squamata, Lizard Venomous                | <.01% |
| 1741 | Squamata, Monitor Asian Water            | <.01% |
| 1742 | Squamata, Monitor Black Tree             | <.01% |
| 1743 | Squamata, Monitor Blue Tree              | <.01% |
| 1744 | Squamata, Monitor Nile                   | <.01% |
| 1745 | Squamata, Python Boelon's                | <.01% |
| 1746 | Squamata, Python Indian Rock             | <.01% |
| 1747 | Squamata, Python Woma                    | <.01% |
| 1748 | Squamata, Rattlesnake Eastern Massasauga | <.01% |
| 1749 | Squamata, Skink Solomon Island           | <.01% |
| 1750 | Squamata, Snake American                 | <.01% |
| 1751 | Squamata, Snake Brown Tree               | <.01% |
| 1752 | Squamata, Snake Bull                     | <.01% |

|      |                                                   |       |
|------|---------------------------------------------------|-------|
| 1753 | Squamata, Snake Cat-Eyed                          | <.01% |
| 1754 | Squamata, Snake Diamond Back Eastern Rattle       | <.01% |
| 1755 | Squamata, Snake Diamondback Rattlesnake           | <.01% |
| 1756 | Squamata, Snake Fox                               | <.01% |
| 1757 | Squamata, Snake Indigo                            | <.01% |
| 1758 | Squamata, Snake Native Venomous                   | <.01% |
| 1759 | Squamata, Snake North American Venomous           | <.01% |
| 1760 | Squamata, Snake Pine                              | <.01% |
| 1761 | Squamata, Snake Pygmy Rattlesnake                 | <.01% |
| 1762 | Squamata, Snake Santa Catalina Island Rattlesnake | <.01% |
| 1763 | Squamata, Snake Sea                               | <.01% |
| 1764 | Squamata, Snake Small Non-Venomous                | <.01% |
| 1765 | Squamata, Snake South American                    | <.01% |
| 1766 | Squamata, Snake Viper Old World                   | <.01% |
| 1767 | Squamata, Snake Viper Rhinoceros                  | <.01% |
| 1768 | Squamata, Snake Viper Tree                        | <.01% |
| 1769 | Xenarthra, Armadillo Pink Fairy                   | <.01% |
| 1770 | Xenarthra, Armadillo Three-Banded                 | <.01% |
| 1771 | Xenarthra, Sloth Linnaeus's Two-Toed              | <.01% |
| 1772 | Amphibia, Amphibian Desert                        | <.01% |
| 1773 | Amphibia, Amphibian European                      | <.01% |
| 1774 | Amphibia, Amphibian Savanna                       | <.01% |
| 1775 | Amphibia, Amphibian Terrestrial                   | <.01% |
| 1776 | Amphibia, Amphibian Tundra                        | <.01% |
| 1777 | Amphibia, Amphibian Unique                        | <.01% |
| 1778 | Amphibia, Amphiuma                                | <.01% |
| 1779 | Amphibia, Bullfrog African                        | <.01% |
| 1780 | Amphibia, Frog African                            | <.01% |
| 1781 | Amphibia, Frog Blue Poison Dart                   | <.01% |
| 1782 | Amphibia, Frog Brazilian Horned                   | <.01% |
| 1783 | Amphibia, Frog Budgett's                          | <.01% |
| 1784 | Amphibia, Frog California Red Legged              | <.01% |
| 1785 | Amphibia, Frog Carolina Gopher                    | <.01% |
| 1786 | Amphibia, Frog Dusky Gopher                       | <.01% |
| 1787 | Amphibia, Frog Gliding Tree                       | <.01% |
| 1788 | Amphibia, Frog Horned Species                     | <.01% |
| 1789 | Amphibia, Frog Lehmann's Poison                   | <.01% |
| 1790 | Amphibia, Frog Leopard                            | <.01% |
| 1791 | Amphibia, Frog Little Tree                        | <.01% |
| 1792 | Amphibia, Frog Mossy                              | <.01% |
| 1793 | Amphibia, Frog Ornate Tree                        | <.01% |
| 1794 | Amphibia, Frog Pacman                             | <.01% |
| 1795 | Amphibia, Frog Painted                            | <.01% |
| 1796 | Amphibia, Frog Peruvian River                     | <.01% |
| 1797 | Amphibia, Frog Pine Barren Tree                   | <.01% |
| 1798 | Amphibia, Frog Polka-Dot Tree                     | <.01% |
| 1799 | Amphibia, Frog Pond                               | <.01% |
| 1800 | Amphibia, Frog Scrotum                            | <.01% |

|      |                                                      |       |
|------|------------------------------------------------------|-------|
| 1801 | Amphibia, Frog Small                                 | <.01% |
| 1802 | Amphibia, Frog Smokey Jungle                         | <.01% |
| 1803 | Amphibia, Frog Solomon Island Leaf                   | <.01% |
| 1804 | Amphibia, Frog Spiny Headed Tree                     | <.01% |
| 1805 | Amphibia, Frog Stephen Island                        | <.01% |
| 1806 | Amphibia, Frog Tropical                              | <.01% |
| 1807 | Amphibia, Frog Vietnamese Mossy                      | <.01% |
| 1808 | Amphibia, Frog Water                                 | <.01% |
| 1809 | Amphibia, Frog Waxy Monkey Tree                      | <.01% |
| 1810 | Amphibia, Hellbender Eastern                         | <.01% |
| 1811 | Amphibia, Mantella Green                             | <.01% |
| 1812 | Amphibia, Newt Black Spotted                         | <.01% |
| 1813 | Amphibia, Newt California                            | <.01% |
| 1814 | Amphibia, Newt Sierra                                | <.01% |
| 1815 | Amphibia, Salamander Ambystomatid                    | <.01% |
| 1816 | Amphibia, Salamander Aquatic Siren Rio Grande Lesser | <.01% |
| 1817 | Amphibia, Salamander Blind Cave                      | <.01% |
| 1818 | Amphibia, Salamander Brook                           | <.01% |
| 1819 | Amphibia, Salamander Chinese                         | <.01% |
| 1820 | Amphibia, Salamander Cryptobranchid                  | <.01% |
| 1821 | Amphibia, Salamander Four-Toed                       | <.01% |
| 1822 | Amphibia, Salamander Frosted Flatwoods               | <.01% |
| 1823 | Amphibia, Salamander Lungless                        | <.01% |
| 1824 | Amphibia, Salamander Mole                            | <.01% |
| 1825 | Amphibia, Salamander Mudpuppy                        | <.01% |
| 1826 | Amphibia, Salamander North American                  | <.01% |
| 1827 | Amphibia, Salamander Shenandoah                      | <.01% |
| 1828 | Amphibia, Salamander Texas Blind                     | <.01% |
| 1829 | Amphibia, Toad Boreal                                | <.01% |
| 1830 | Amphibia, Toad Cane                                  | <.01% |
| 1831 | Amphibia, Toad Colorado River                        | <.01% |
| 1832 | Amphibia, Toad Congolese Giant                       | <.01% |
| 1833 | Amphibia, Toad Firebelly                             | <.01% |
| 1834 | Amphibia, Toad Marine                                | <.01% |
| 1835 | Amphibia, Toad North American                        | <.01% |
| 1836 | Amphibia, Toad Oyster                                | <.01% |
| 1837 | Amphibia, Toad Panamanian Golden                     | <.01% |
| 1838 | Amphibia, Toad River                                 | <.01% |
| 1839 | Amphibia, Toad Secret Headed Agama                   | <.01% |
| 1840 | Amphibia, Toad Spadefoot                             | <.01% |
| 1841 | Amphibia, Toad Spray                                 | <.01% |
| 1842 | Amphibia, Toad Suriname                              | <.01% |
| 1843 | Amphibia, Toad Walking                               | <.01% |
| 1844 | Artiodactyla, Antelope Royal                         | <.01% |
| 1845 | Artiodactyla, Antelope Sable Giant                   | <.01% |
| 1846 | Artiodactyla, Babirusa North Sulawesi                | <.01% |
| 1847 | Artiodactyla, Caribou Woodland                       | <.01% |
| 1848 | Artiodactyla, Cattle American Heritage Breed         | <.01% |

|      |                                            |       |
|------|--------------------------------------------|-------|
| 1849 | Artiodactyla, Cattle Ankole-Watusi         | <.01% |
| 1850 | Artiodactyla, Cattle Banteng               | <.01% |
| 1851 | Artiodactyla, Cattle Scottish Highland     | <.01% |
| 1852 | Artiodactyla, Chevrotain Water             | <.01% |
| 1853 | Artiodactyla, Chinkara                     | <.01% |
| 1854 | Artiodactyla, Cow Asian                    | <.01% |
| 1855 | Artiodactyla, Cow Dairy                    | <.01% |
| 1856 | Artiodactyla, Deer Barasingha              | <.01% |
| 1857 | Artiodactyla, Deer Bawean                  | <.01% |
| 1858 | Artiodactyla, Deer Blacktailed             | <.01% |
| 1859 | Artiodactyla, Deer Calamian                | <.01% |
| 1860 | Artiodactyla, Deer Cheviot's Mouse         | <.01% |
| 1861 | Artiodactyla, Deer Chinese Water           | <.01% |
| 1862 | Artiodactyla, Deer Elk                     | <.01% |
| 1863 | Artiodactyla, Deer European                | <.01% |
| 1864 | Artiodactyla, Deer Leaf                    | <.01% |
| 1865 | Artiodactyla, Deer Mule                    | <.01% |
| 1866 | Artiodactyla, Deer Muntjac Reeves          | <.01% |
| 1867 | Artiodactyla, Deer Musk                    | <.01% |
| 1868 | Artiodactyla, Deer North American          | <.01% |
| 1869 | Artiodactyla, Deer Pampas                  | <.01% |
| 1870 | Artiodactyla, Deer South American          | <.01% |
| 1871 | Artiodactyla, Deer Swamp                   | <.01% |
| 1872 | Artiodactyla, Deer Thorold's               | <.01% |
| 1873 | Artiodactyla, Deer Visayan Spotted         | <.01% |
| 1874 | Artiodactyla, Duiker Bay                   | <.01% |
| 1875 | Artiodactyla, Eland Lesser/Common          | <.01% |
| 1876 | Proboscidea, Elephant African Bush         | <.01% |
| 1877 | Proboscidea, Elephant Borneo Pygmy         | <.01% |
| 1878 | Proboscidea, Elephant Forest               | <.01% |
| 1879 | Proboscidea, Elephant Pygmy                | <.01% |
| 1880 | Artiodactyla, Elk Roosevelt                | <.01% |
| 1881 | Artiodactyla, Gazelle African              | <.01% |
| 1882 | Artiodactyla, Gazelle Grants               | <.01% |
| 1883 | Artiodactyla, Giraffe Endangered           | <.01% |
| 1884 | Artiodactyla, Goat American Heritage Breed | <.01% |
| 1885 | Artiodactyla, Goat Anglo-Nubian            | <.01% |
| 1886 | Artiodactyla, Goat Arapawa                 | <.01% |
| 1887 | Artiodactyla, Goat Asia                    | <.01% |
| 1888 | Artiodactyla, Goat Dwarf Nigerian          | <.01% |
| 1889 | Artiodactyla, Goat Exotic Mountain         | <.01% |
| 1890 | Artiodactyla, Hog Guinea                   | <.01% |
| 1891 | Artiodactyla, Hoof Mammals                 | <.01% |
| 1892 | Artiodactyla, Hoof Small Stock             | <.01% |
| 1893 | Artiodactyla, Hoofstock European           | <.01% |
| 1894 | Artiodactyla, Ibex Walia                   | <.01% |
| 1895 | Artiodactyla, Impala Black-faced           | <.01% |
| 1896 | Artiodactyla, Kob                          | <.01% |

|      |                                               |       |
|------|-----------------------------------------------|-------|
| 1897 | Artiodactyla, Kouprey                         | <.01% |
| 1898 | Artiodactyla, Lechwe                          | <.01% |
| 1899 | Artiodactyla, Lechwe Red                      | <.01% |
| 1900 | Artiodactyla, Moose Alaskan                   | <.01% |
| 1901 | Artiodactyla, Mouflon Armenian                | <.01% |
| 1902 | Artiodactyla, Peccary Collared                | <.01% |
| 1903 | Artiodactyla, Peccary White Lipped            | <.01% |
| 1904 | Artiodactyla, Pig Asian Wild                  | <.01% |
| 1905 | Artiodactyla, Pig Wild Boar                   | <.01% |
| 1906 | Artiodactyla, Pronghorn Peninsular            | <.01% |
| 1907 | Artiodactyla, Serow                           | <.01% |
| 1908 | Artiodactyla, Sheep American Heritage Breed   | <.01% |
| 1909 | Artiodactyla, Sheep Heritage Breed            | <.01% |
| 1910 | Artiodactyla, Sheep Peninsular Desert Bighorn | <.01% |
| 1911 | Artiodactyla, Sheep Rare Breed                | <.01% |
| 1912 | Artiodactyla, Small                           | <.01% |
| 1913 | Artiodactyla, Steenbok                        | <.01% |
| 1914 | Artiodactyla, Tahr Himalayan                  | <.01% |
| 1915 | Artiodactyla, Takin Golden                    | <.01% |
| 1916 | Artiodactyla, Tur W Caucasian                 | <.01% |
| 1917 | Artiodactyla, Ungulate European               | <.01% |
| 1918 | Artiodactyla, Wildebeest Black                | <.01% |
| 1919 | Aves, Albatross Amsterdam                     | <.01% |
| 1920 | Aves, Amazon Green Cheek                      | <.01% |
| 1921 | Aves, Anhinga                                 | <.01% |
| 1922 | Aves, Antpitta                                | <.01% |
| 1923 | Aves, Aracari Curl Crested                    | <.01% |
| 1924 | Aves, Aracari Green                           | <.01% |
| 1925 | Aves, Bee Eater Carmine                       | <.01% |
| 1926 | Aves, Bee Eater White Throated                | <.01% |
| 1927 | Aves, Bird African Endangered                 | <.01% |
| 1928 | Aves, Bird African Rainforest                 | <.01% |
| 1929 | Aves, Bird African Savannah                   | <.01% |
| 1930 | Aves, Bird African Song                       | <.01% |
| 1931 | Aves, Bird Amazon Cuban                       | <.01% |
| 1932 | Aves, Bird America                            | <.01% |
| 1933 | Aves, Bird Antarctic                          | <.01% |
| 1934 | Aves, Bird Aquatic Africa                     | <.01% |
| 1935 | Aves, Bird Aquatic America                    | <.01% |
| 1936 | Aves, Bird Asian                              | <.01% |
| 1937 | Aves, Bird Asian Songbirds Endangered         | <.01% |
| 1938 | Aves, Bird Aviary Tropical                    | <.01% |
| 1939 | Aves, Bird Bell                               | <.01% |
| 1940 | Aves, Bird Bristlebird                        | <.01% |
| 1941 | Aves, Bird Cape Sable Seaside Sparrow         | <.01% |
| 1942 | Aves, Bird Carnivorous                        | <.01% |
| 1943 | Aves, Bird Coastal                            | <.01% |
| 1944 | Aves, Bird Colorful Tropical                  | <.01% |

|      |                                             |       |
|------|---------------------------------------------|-------|
| 1945 | Aves, Bird Compatible African Aviary        | <.01% |
| 1946 | Aves, Bird Compatible Asian Aviary          | <.01% |
| 1947 | Aves, Bird Compatible South American Aviary | <.01% |
| 1948 | Aves, Bird Deciduous Forest                 | <.01% |
| 1949 | Aves, Bird Domesticated                     | <.01% |
| 1950 | Aves, Bird Endangered North American        | <.01% |
| 1951 | Aves, Bird Endangered Rainforest            | <.01% |
| 1952 | Aves, Bird Endemic Hawaiian                 | <.01% |
| 1953 | Aves, Bird Endemic To The Zoo's Region      | <.01% |
| 1954 | Aves, Bird Eurasian                         | <.01% |
| 1955 | Aves, Bird Every Geographical Region        | <.01% |
| 1956 | Aves, Bird Fantail Rufous                   | <.01% |
| 1957 | Aves, Bird Fish Eating                      | <.01% |
| 1958 | Aves, Bird For Mixed Species Exhibits       | <.01% |
| 1959 | Aves, Bird Frigate                          | <.01% |
| 1960 | Aves, Bird Fruit Eating                     | <.01% |
| 1961 | Aves, Bird Fruit/Seed Eating                | <.01% |
| 1962 | Aves, Bird Go Away                          | <.01% |
| 1963 | Aves, Bird Ground                           | <.01% |
| 1964 | Aves, Bird Hawaiian Endangered              | <.01% |
| 1965 | Aves, Bird Hawaiian Forest                  | <.01% |
| 1966 | Aves, Bird Hummingbird Endangered           | <.01% |
| 1967 | Aves, Bird Killdeer                         | <.01% |
| 1968 | Aves, Bird Large African                    | <.01% |
| 1969 | Aves, Bird Large Land                       | <.01% |
| 1970 | Aves, Bird Large Predatory                  | <.01% |
| 1971 | Aves, Bird Little Endangered                | <.01% |
| 1972 | Aves, Bird Madagascar                       | <.01% |
| 1973 | Aves, Bird Mariana Islands                  | <.01% |
| 1974 | Aves, Bird Marsh                            | <.01% |
| 1975 | Aves, Bird Medium                           | <.01% |
| 1976 | Aves, Bird Migratory Endangered             | <.01% |
| 1977 | Aves, Bird Mountain                         | <.01% |
| 1978 | Aves, Bird Native WaterBird                 | <.01% |
| 1979 | Aves, Bird Neotropical                      | <.01% |
| 1980 | Aves, Bird New World                        | <.01% |
| 1981 | Aves, Bird New Zealand                      | <.01% |
| 1982 | Aves, Bird North American Prairie           | <.01% |
| 1983 | Aves, Bird North American ShoreBird         | <.01% |
| 1984 | Aves, Bird Of Paradise Superb               | <.01% |
| 1985 | Aves, Bird Of Prey Endangered               | <.01% |
| 1986 | Aves, Bird Of Prey Rescued                  | <.01% |
| 1987 | Aves, Bird Of Prey Small                    | <.01% |
| 1988 | Aves, Bird Old World                        | <.01% |
| 1989 | Aves, Bird Paradise Fly-Catcher             | <.01% |
| 1990 | Aves, Bird Perching                         | <.01% |
| 1991 | Aves, Bird Prairie                          | <.01% |
| 1992 | Aves, Bird Rescued                          | <.01% |

|      |                                           |       |
|------|-------------------------------------------|-------|
| 1993 | Aves, Bird Rescued Native                 | <.01% |
| 1994 | Aves, Bird Scrub-Bird                     | <.01% |
| 1995 | Aves, Bird Songbirds African              | <.01% |
| 1996 | Aves, Bird Songbirds America Native       | <.01% |
| 1997 | Aves, Bird Songbirds Indonesian           | <.01% |
| 1998 | Aves, Bird Songbirds Local                | <.01% |
| 1999 | Aves, Bird Songbirds Migratory            | <.01% |
| 2000 | Aves, Bird Songbirds SE Asian             | <.01% |
| 2001 | Aves, Bird Songbirds Small                | <.01% |
| 2002 | Aves, Bird Songbirds Small Colorful       | <.01% |
| 2003 | Aves, Bird Songbirds Small South American | <.01% |
| 2004 | Aves, Bird Songbirds Tropical             | <.01% |
| 2005 | Aves, Bird South American Tropical        | <.01% |
| 2006 | Aves, Bird Storks                         | <.01% |
| 2007 | Aves, Bird Sun                            | <.01% |
| 2008 | Aves, Bird Swamp                          | <.01% |
| 2009 | Aves, Bird Temperate                      | <.01% |
| 2010 | Aves, Bird Temperate Forest               | <.01% |
| 2011 | Aves, Bird Temperate Habitat              | <.01% |
| 2012 | Aves, Bird Threatened Migratory           | <.01% |
| 2013 | Aves, Bird Tropical Endangered            | <.01% |
| 2014 | Aves, Bird Tundra                         | <.01% |
| 2015 | Aves, Bird Umbrella                       | <.01% |
| 2016 | Aves, Bird Wading                         | <.01% |
| 2017 | Aves, Bird Wading Endangered              | <.01% |
| 2018 | Aves, Bird Wetland                        | <.01% |
| 2019 | Aves, Bird White-Eyes Bridled             | <.01% |
| 2020 | Aves, Bittern American                    | <.01% |
| 2021 | Aves, Boobies                             | <.01% |
| 2022 | Aves, Bulbul                              | <.01% |
| 2023 | Aves, Bunting Painted                     | <.01% |
| 2024 | Aves, Bustard Buff Crested                | <.01% |
| 2025 | Aves, Bustard Great Indian                | <.01% |
| 2026 | Aves, Bustard Houbara                     | <.01% |
| 2027 | Aves, Cacique Yellow Rumped               | <.01% |
| 2028 | Aves, Capercaillie                        | <.01% |
| 2029 | Aves, Cara Cara                           | <.01% |
| 2030 | Aves, Cardinal Red Crested                | <.01% |
| 2031 | Aves, Chicken American Heritage Breed     | <.01% |
| 2032 | Aves, Chicken Prairie Lesser              | <.01% |
| 2033 | Aves, Cockatoo Gang Gang                  | <.01% |
| 2034 | Aves, Cockatoo Indonesian                 | <.01% |
| 2035 | Aves, Cockatoo Lesser Sulphur Crested     | <.01% |
| 2036 | Aves, Cockatoo Red Tail Black             | <.01% |
| 2037 | Aves, Cockatoo Red Vented                 | <.01% |
| 2038 | Aves, Cockatoo Sulphur Crest              | <.01% |
| 2039 | Aves, Cockatoo Umbrella                   | <.01% |
| 2040 | Aves, Conure                              | <.01% |

|      |                                    |       |
|------|------------------------------------|-------|
| 2041 | Aves, Conure Golden                | <.01% |
| 2042 | Aves, Cotinga                      | <.01% |
| 2043 | Aves, Coua Crested                 | <.01% |
| 2044 | Aves, Cracidae                     | <.01% |
| 2045 | Aves, Crane Black Crowned          | <.01% |
| 2046 | Aves, Crane Endangered             | <.01% |
| 2047 | Aves, Crane Grey                   | <.01% |
| 2048 | Aves, Crane Hooded                 | <.01% |
| 2049 | Aves, Crane North American         | <.01% |
| 2050 | Aves, Crane Threatened             | <.01% |
| 2051 | Aves, Cuckoos Ground               | <.01% |
| 2052 | Aves, Curassow Blue-Faced          | <.01% |
| 2053 | Aves, Curassow Great               | <.01% |
| 2054 | Aves, Dikkop                       | <.01% |
| 2055 | Aves, Dikkop Spotted               | <.01% |
| 2056 | Aves, Dove Bleeding Heart Mindanao | <.01% |
| 2057 | Aves, Dove Bleeding Heart Sulu     | <.01% |
| 2058 | Aves, Dove Blue-Headed Ground      | <.01% |
| 2059 | Aves, Dove Diamond                 | <.01% |
| 2060 | Aves, Dove Endangered              | <.01% |
| 2061 | Aves, Dove Flame                   | <.01% |
| 2062 | Aves, Dove Pink-Necked Fruit       | <.01% |
| 2063 | Aves, Duck American                | <.01% |
| 2064 | Aves, Duck American Heritage Breed | <.01% |
| 2065 | Aves, Duck Exotic                  | <.01% |
| 2066 | Aves, Duck Freshwater              | <.01% |
| 2067 | Aves, Duck Laysan                  | <.01% |
| 2068 | Aves, Duck Long-Tailed             | <.01% |
| 2069 | Aves, Duck Masked                  | <.01% |
| 2070 | Aves, Duck Muscovy                 | <.01% |
| 2071 | Aves, Duck North American          | <.01% |
| 2072 | Aves, Duck Pink-Eared              | <.01% |
| 2073 | Aves, Duck Redhead                 | <.01% |
| 2074 | Aves, Duck South American          | <.01% |
| 2075 | Aves, Duck Spotted Whistling       | <.01% |
| 2076 | Aves, Duck Stiff-Tail              | <.01% |
| 2077 | Aves, Duck Torrent                 | <.01% |
| 2078 | Aves, Duck Whistling               | <.01% |
| 2079 | Aves, Ducks South American         | <.01% |
| 2080 | Aves, Eagle African                | <.01% |
| 2081 | Aves, Eagle African Crowned        | <.01% |
| 2082 | Aves, Eagle African Fishing        | <.01% |
| 2083 | Aves, Eagle American               | <.01% |
| 2084 | Aves, Eagle Asian                  | <.01% |
| 2085 | Aves, Eagle Bangalore              | <.01% |
| 2086 | Aves, Eagle Crowned                | <.01% |
| 2087 | Aves, Eagle Endangered             | <.01% |
| 2088 | Aves, Eagle Large                  | <.01% |

|      |                                        |       |
|------|----------------------------------------|-------|
| 2089 | Aves, Eagle Native                     | <.01% |
| 2090 | Aves, Eagle Non-Native                 | <.01% |
| 2091 | Aves, Eagle North American             | <.01% |
| 2092 | Aves, Eagle Pallas's Sea               | <.01% |
| 2093 | Aves, Eagle Rescued Bald               | <.01% |
| 2094 | Aves, Eagle Sea                        | <.01% |
| 2095 | Aves, Eagle South American             | <.01% |
| 2096 | Aves, Eagle Spanish Imperial           | <.01% |
| 2097 | Aves, Eider                            | <.01% |
| 2098 | Aves, Emerald Hummingbird              | <.01% |
| 2099 | Aves, Falcon Aplomodo                  | <.01% |
| 2100 | Aves, Falcon Gyr                       | <.01% |
| 2101 | Aves, Finch Diamond Firetail           | <.01% |
| 2102 | Aves, Finch Estrildid                  | <.01% |
| 2103 | Aves, Finfoot Masked                   | <.01% |
| 2104 | Aves, Firecrown Juan Fernandez         | <.01% |
| 2105 | Aves, Flowerpecker Cebu                | <.01% |
| 2106 | Aves, Fowl Guinea Vulturine            | <.01% |
| 2107 | Aves, Galliformes Endangered           | <.01% |
| 2108 | Aves, Goldfinch                        | <.01% |
| 2109 | Aves, Goose Bar-Headed                 | <.01% |
| 2110 | Aves, Goose Brant                      | <.01% |
| 2111 | Aves, Goose Canada                     | <.01% |
| 2112 | Aves, Goose Endangered                 | <.01% |
| 2113 | Aves, Goose Magpie                     | <.01% |
| 2114 | Aves, Grebe                            | <.01% |
| 2115 | Aves, Grouse                           | <.01% |
| 2116 | Aves, Grouse Endangered                | <.01% |
| 2117 | Aves, Grouse Prairie                   | <.01% |
| 2118 | Aves, Grouse Sage Gunnison             | <.01% |
| 2119 | Aves, Guan                             | <.01% |
| 2120 | Aves, Guineafowl Vulturine             | <.01% |
| 2121 | Aves, Gull Kelp                        | <.01% |
| 2122 | Aves, Heron Black Crowned Night        | <.01% |
| 2123 | Aves, Heron Green                      | <.01% |
| 2124 | Aves, Honeyeater                       | <.01% |
| 2125 | Aves, Honeyeater Regent                | <.01% |
| 2126 | Aves, Hoopoe                           | <.01% |
| 2127 | Aves, Hoopoe Wood                      | <.01% |
| 2128 | Aves, Hornbill Aerial                  | <.01% |
| 2129 | Aves, Hornbill Black-and-White-Casqued | <.01% |
| 2130 | Aves, Hornbill Giant                   | <.01% |
| 2131 | Aves, Hornbill Malayan Wreath-Billed   | <.01% |
| 2132 | Aves, Hornbill Northern Ground         | <.01% |
| 2133 | Aves, Hornbill Rainforest              | <.01% |
| 2134 | Aves, Hornbill Red Bill                | <.01% |
| 2135 | Aves, Hornbill Small Tockus            | <.01% |
| 2136 | Aves, Hornbill Yellow Bill             | <.01% |

|      |                                    |       |
|------|------------------------------------|-------|
| 2137 | Aves, Hummingbird - Green Breasted | <.01% |
| 2138 | Aves, Ibis African Sacred          | <.01% |
| 2139 | Aves, Ibis Dwarf Olive             | <.01% |
| 2140 | Aves, Ibis Hadada                  | <.01% |
| 2141 | Aves, Ibis Madagascar Crested      | <.01% |
| 2142 | Aves, Ibis Puna                    | <.01% |
| 2143 | Aves, Ibis South American          | <.01% |
| 2144 | Aves, Jays Collies                 | <.01% |
| 2145 | Aves, Jays Magpie                  | <.01% |
| 2146 | Aves, Jays Plush Crested           | <.01% |
| 2147 | Aves, Kestrel American             | <.01% |
| 2148 | Aves, Kestrel Mauritius            | <.01% |
| 2149 | Aves, Kingfisher African Pygmy     | <.01% |
| 2150 | Aves, Kittiwake                    | <.01% |
| 2151 | Aves, Knot Red                     | <.01% |
| 2152 | Aves, Lapwing Masked               | <.01% |
| 2153 | Aves, Lapwing Spur Winged          | <.01% |
| 2154 | Aves, Lorikeet Coconut             | <.01% |
| 2155 | Aves, Lorikeet Forstens            | <.01% |
| 2156 | Aves, Lorikeet Indonesian          | <.01% |
| 2157 | Aves, Macaw Great Green            | <.01% |
| 2158 | Aves, Macaw Military               | <.01% |
| 2159 | Aves, Macaw Red-and-Green          | <.01% |
| 2160 | Aves, Magpie                       | <.01% |
| 2161 | Aves, Magpie Yellow Billed         | <.01% |
| 2162 | Aves, Manakin                      | <.01% |
| 2163 | Aves, Manakin Araripe              | <.01% |
| 2164 | Aves, Martin Purple                | <.01% |
| 2165 | Aves, Merganser                    | <.01% |
| 2166 | Aves, Merganser Large              | <.01% |
| 2167 | Aves, Moorhen                      | <.01% |
| 2168 | Aves, Motmot                       | <.01% |
| 2169 | Aves, Murre Common                 | <.01% |
| 2170 | Aves, Nightjar                     | <.01% |
| 2171 | Aves, Oriole Bahamas               | <.01% |
| 2172 | Aves, Oropendula Crested           | <.01% |
| 2173 | Aves, Ostrich Masai                | <.01% |
| 2174 | Aves, Owl Ferruginous Pygmy        | <.01% |
| 2175 | Aves, Owl Longhorned               | <.01% |
| 2176 | Aves, Owl Pygmy                    | <.01% |
| 2177 | Aves, Owl Spotted                  | <.01% |
| 2178 | Aves, Owl Tawny                    | <.01% |
| 2179 | Aves, Owl Verreaux's Eagle         | <.01% |
| 2180 | Aves, Parakeet Echo                | <.01% |
| 2181 | Aves, Parakeet Monk                | <.01% |
| 2182 | Aves, Parakeet Scarlet Chest       | <.01% |
| 2183 | Aves, Parrot Amazon Large          | <.01% |
| 2184 | Aves, Parrot Blue-Crowned Hanging  | <.01% |

|      |                                            |       |
|------|--------------------------------------------|-------|
| 2185 | Aves, Parrot Burrowing                     | <.01% |
| 2186 | Aves, Parrot Fig                           | <.01% |
| 2187 | Aves, Parrot Large                         | <.01% |
| 2188 | Aves, Parrot Maroon Fronted                | <.01% |
| 2189 | Aves, Parrot New World                     | <.01% |
| 2190 | Aves, Parrot New Zealand Ground            | <.01% |
| 2191 | Aves, Parrot Old World                     | <.01% |
| 2192 | Aves, Parrot Orange-Bellied                | <.01% |
| 2193 | Aves, Parrot Quaker                        | <.01% |
| 2194 | Aves, Parrot Rainforest                    | <.01% |
| 2195 | Aves, Parrot Senegal                       | <.01% |
| 2196 | Aves, Parrot St. Vincent Amazon            | <.01% |
| 2197 | Aves, Parrot Threatened                    | <.01% |
| 2198 | Aves, Parrot Tropical                      | <.01% |
| 2199 | Aves, Parrot Yellow Headed                 | <.01% |
| 2200 | Aves, Parrot Yellow Naped                  | <.01% |
| 2201 | Aves, Parrot Yellow-Headed Amazon          | <.01% |
| 2202 | Aves, Parrot Yellow-Naped Amazon           | <.01% |
| 2203 | Aves, Partridge                            | <.01% |
| 2204 | Aves, Passerine Affected By Climate Change | <.01% |
| 2205 | Aves, Passerine Declining                  | <.01% |
| 2206 | Aves, Passerine Neotropical                | <.01% |
| 2207 | Aves, Passerine Social                     | <.01% |
| 2208 | Aves, Passerine Tropical                   | <.01% |
| 2209 | Aves, Peafowl Indian                       | <.01% |
| 2210 | Aves, Pelican American White               | <.01% |
| 2211 | Aves, Penguin Banded                       | <.01% |
| 2212 | Aves, Penguin Brush Tailed                 | <.01% |
| 2213 | Aves, Penguin Chinstrap                    | <.01% |
| 2214 | Aves, Petrel                               | <.01% |
| 2215 | Aves, Pheasant Asian                       | <.01% |
| 2216 | Aves, Pheasant Currasow                    | <.01% |
| 2217 | Aves, Pheasant Green-Naped                 | <.01% |
| 2218 | Aves, Pheasant Silver                      | <.01% |
| 2219 | Aves, Pheasant Vietnamese                  | <.01% |
| 2220 | Aves, Pigeon Blue Crowned                  | <.01% |
| 2221 | Aves, Pigeon Crested                       | <.01% |
| 2222 | Aves, Pigeon Green-Naped Pheasant          | <.01% |
| 2223 | Aves, Pigeon Guillemot                     | <.01% |
| 2224 | Aves, Pigeon Mauritius Pink                | <.01% |
| 2225 | Aves, Pigeon Mindoro Imperial              | <.01% |
| 2226 | Aves, Pitohui                              | <.01% |
| 2227 | Aves, Pitta                                | <.01% |
| 2228 | Aves, Pitta Hooded                         | <.01% |
| 2229 | Aves, Plover Egyptian                      | <.01% |
| 2230 | Aves, Plover Gray                          | <.01% |
| 2231 | Aves, Plover Mountain                      | <.01% |
| 2232 | Aves, Pochard Malagasy                     | <.01% |

|      |                                    |       |
|------|------------------------------------|-------|
| 2233 | Aves, Psittacines Large            | <.01% |
| 2234 | Aves, Psittacines South American   | <.01% |
| 2235 | Aves, Puffin Horned                | <.01% |
| 2236 | Aves, Quail Bobwhite               | <.01% |
| 2237 | Aves, Quail Bobwhite Masked        | <.01% |
| 2238 | Aves, Quail Himalayan              | <.01% |
| 2239 | Aves, Rail                         | <.01% |
| 2240 | Aves, Raptor Firehawk Australian   | <.01% |
| 2241 | Aves, Ratite Cassowary Dwarf       | <.01% |
| 2242 | Aves, Ratite Cassowary Northern    | <.01% |
| 2243 | Aves, Rhea Greater                 | <.01% |
| 2244 | Aves, Rhea Lesser                  | <.01% |
| 2245 | Aves, Robin Pekin                  | <.01% |
| 2246 | Aves, Sandpiper Spoon Billed       | <.01% |
| 2247 | Aves, Screamer Horned              | <.01% |
| 2248 | Aves, Shrike                       | <.01% |
| 2249 | Aves, Shrike Eastern Loggerhead    | <.01% |
| 2250 | Aves, Skimmer                      | <.01% |
| 2251 | Aves, Smew                         | <.01% |
| 2252 | Aves, Stork Black                  | <.01% |
| 2253 | Aves, Stork Lesser Adjutant        | <.01% |
| 2254 | Aves, Stork Yellow-Billed          | <.01% |
| 2255 | Aves, Swallow                      | <.01% |
| 2256 | Aves, Swan Whooper                 | <.01% |
| 2257 | Aves, Takahe                       | <.01% |
| 2258 | Aves, Tanager Blue Grey            | <.01% |
| 2259 | Aves, Tanager Neotropical          | <.01% |
| 2260 | Aves, Teal                         | <.01% |
| 2261 | Aves, Teal Baikal                  | <.01% |
| 2262 | Aves, Teal Hottentot               | <.01% |
| 2263 | Aves, Teal Laysan                  | <.01% |
| 2264 | Aves, Teal Malagasy                | <.01% |
| 2265 | Aves, Teal Marbled                 | <.01% |
| 2266 | Aves, Tern Chinese Crested         | <.01% |
| 2267 | Aves, Tern Least                   | <.01% |
| 2268 | Aves, Thrush Chesnut Backed        | <.01% |
| 2269 | Aves, Thrush Laughing              | <.01% |
| 2270 | Aves, Thrush Shama                 | <.01% |
| 2271 | Aves, Titmouse                     | <.01% |
| 2272 | Aves, Tody Cuban or Jamaican       | <.01% |
| 2273 | Aves, Toucan Large                 | <.01% |
| 2274 | Aves, Toucan Mountain              | <.01% |
| 2275 | Aves, Toucan Mountain Plate-Pilled | <.01% |
| 2276 | Aves, Toucanets                    | <.01% |
| 2277 | Aves, Trogon                       | <.01% |
| 2278 | Aves, Troupial                     | <.01% |
| 2279 | Aves, Trumpeter                    | <.01% |
| 2280 | Aves, Turaco Bannerman's           | <.01% |

|      |                                            |       |
|------|--------------------------------------------|-------|
| 2281 | Aves, Turaco Endangered                    | <.01% |
| 2282 | Aves, Turaco Fischer's                     | <.01% |
| 2283 | Aves, Turaco Green                         | <.01% |
| 2284 | Aves, Turaco Red-Crested                   | <.01% |
| 2285 | Aves, Vulture Black                        | <.01% |
| 2286 | Aves, Vulture Black American               | <.01% |
| 2287 | Aves, Vulture Cape                         | <.01% |
| 2288 | Aves, Vulture Indian                       | <.01% |
| 2289 | Aves, Vulture Large                        | <.01% |
| 2290 | Aves, Warbler Kirtland's                   | <.01% |
| 2291 | Aves, Warbler Yellow Bellied               | <.01% |
| 2292 | Aves, Waterfowl Endangered                 | <.01% |
| 2293 | Aves, Waterfowl Eurasian                   | <.01% |
| 2294 | Aves, Weaver Bishop                        | <.01% |
| 2295 | Aves, Weaver White Headed Buffalo          | <.01% |
| 2296 | Aves, Whippoorwill                         | <.01% |
| 2297 | Carnivora, Bear American                   | <.01% |
| 2298 | Carnivora, Black Bear, Formosan            | <.01% |
| 2299 | Carnivora, Canid Asian                     | <.01% |
| 2300 | Carnivora, Canid North American            | <.01% |
| 2301 | Carnivora, Canid South American            | <.01% |
| 2302 | Carnivora, Cat Amazon Wild                 | <.01% |
| 2303 | Carnivora, Cat Arabian Sand                | <.01% |
| 2304 | Carnivora, Cat Bengal                      | <.01% |
| 2305 | Carnivora, Cat Big American                | <.01% |
| 2306 | Carnivora, Cat Big Endangered              | <.01% |
| 2307 | Carnivora, Cat Big North American          | <.01% |
| 2308 | Carnivora, Cat Endangered                  | <.01% |
| 2309 | Carnivora, Cat Endangered Big              | <.01% |
| 2310 | Carnivora, Cat European Wild               | <.01% |
| 2311 | Carnivora, Cat Exotic                      | <.01% |
| 2312 | Carnivora, Cat Golden                      | <.01% |
| 2313 | Carnivora, Cat Large African               | <.01% |
| 2314 | Carnivora, Cat Large Asian                 | <.01% |
| 2315 | Carnivora, Cat Large Endangered            | <.01% |
| 2316 | Carnivora, Cat Lynx                        | <.01% |
| 2317 | Carnivora, Cat Ocelot                      | <.01% |
| 2318 | Carnivora, Cat Rainforest                  | <.01% |
| 2319 | Carnivora, Cat Rusty-Spotted               | <.01% |
| 2320 | Carnivora, Cat Savannah                    | <.01% |
| 2321 | Carnivora, Cat Scottish Wild               | <.01% |
| 2322 | Carnivora, Cat Small Exotic                | <.01% |
| 2323 | Carnivora, Cat Small North American        | <.01% |
| 2324 | Carnivora, Cat Small Unknown By The Public | <.01% |
| 2325 | Carnivora, Cat Tundra                      | <.01% |
| 2326 | Carnivora, Cat Wildcat                     | <.01% |
| 2327 | Carnivora, Cheetah Asiatic                 | <.01% |
| 2328 | Carnivora, Dog New Guinea Singing          | <.01% |

|      |                                          |       |
|------|------------------------------------------|-------|
| 2329 | Carnivora, Dog Raccoon                   | <.01% |
| 2330 | Carnivora, Fox Darwin                    | <.01% |
| 2331 | Carnivora, Fox Island                    | <.01% |
| 2332 | Carnivora, Fox Tibetan Sand              | <.01% |
| 2333 | Carnivora, Genet Spotted                 | <.01% |
| 2334 | Carnivora, Leopard Javan                 | <.01% |
| 2335 | Carnivora, Lion W African                | <.01% |
| 2336 | Carnivora, Marbled Polecat               | <.01% |
| 2337 | Carnivora, Marten                        | <.01% |
| 2338 | Carnivora, Marten American               | <.01% |
| 2339 | Carnivora, Mongoose Dwarf                | <.01% |
| 2340 | Carnivora, Mustelidae North American     | <.01% |
| 2341 | Carnivora, Olinguito                     | <.01% |
| 2342 | Carnivora, Otter Marine (not Sea)        | <.01% |
| 2343 | Carnivora, Pandas                        | <.01% |
| 2344 | Carnivora, Procyonids                    | <.01% |
| 2345 | Carnivora, Seal Antarctic Fur            | <.01% |
| 2346 | Carnivora, Seal Arctic                   | <.01% |
| 2347 | Carnivora, Seal Endangered               | <.01% |
| 2348 | Carnivora, Seal Guadalupe Fur            | <.01% |
| 2349 | Carnivora, Seal Harp                     | <.01% |
| 2350 | Carnivora, Seal Leopard                  | <.01% |
| 2351 | Carnivora, Skunk African polecat         | <.01% |
| 2352 | Carnivora, Small                         | <.01% |
| 2353 | Carnivora, Tiger Endangered              | <.01% |
| 2354 | Carnivora, Weasel North American         | <.01% |
| 2355 | Carnivora, Wolf Endangered               | <.01% |
| 2356 | Cetacea, Cetacean Rescued Rehab          | <.01% |
| 2357 | Cetacea, Dolphin Ganges River            | <.01% |
| 2358 | Cetacea, Dolphin Hector's                | <.01% |
| 2359 | Cetacea, Dolphin Humpback                | <.01% |
| 2360 | Cetacea, Dolphin Indo-Pacific Bottlenose | <.01% |
| 2361 | Cetacea, Dolphin Indus River             | <.01% |
| 2362 | Cetacea, Dolphin River                   | <.01% |
| 2363 | Cetacea, Porpoise Harbor                 | <.01% |
| 2364 | Cetacea, Whale Baleen                    | <.01% |
| 2365 | Cetacea, Whale Minke                     | <.01% |
| 2366 | Cetacea, Whale North Atlantic Right      | <.01% |
| 2367 | Cetacea, Whale Small                     | <.01% |
| 2368 | Chelonia, Chelonian Endangered           | <.01% |
| 2369 | Chelonia, Chelonian Large                | <.01% |
| 2370 | Chelonia, Chelonian Non-Native           | <.01% |
| 2371 | Chelonia, Chelonian Sulawesi Endemic     | <.01% |
| 2372 | Chelonia, Cooter                         | <.01% |
| 2373 | Chelonia, Slider                         | <.01% |
| 2374 | Chelonia, Terrapin Painted               | <.01% |
| 2375 | Chelonia, Tortoise America               | <.01% |
| 2376 | Chelonia, Tortoise Angulate              | <.01% |

|      |                                            |       |
|------|--------------------------------------------|-------|
| 2377 | Chelonia, Tortoise Forsten's               | <.01% |
| 2378 | Chelonia, Tortoise Geometric               | <.01% |
| 2379 | Chelonia, Tortoise Homopus                 | <.01% |
| 2380 | Chelonia, Tortoise Northern Spider         | <.01% |
| 2381 | Chelonia, Tortoise Pinta Island            | <.01% |
| 2382 | Chelonia, Tortoise Psammobates             | <.01% |
| 2383 | Chelonia, Tortoise Spur-Thighed            | <.01% |
| 2384 | Chelonia, Turtle Amazon River              | <.01% |
| 2385 | Chelonia, Turtle America                   | <.01% |
| 2386 | Chelonia, Turtle Asian Freshwater Box      | <.01% |
| 2387 | Chelonia, Turtle Asian River               | <.01% |
| 2388 | Chelonia, Turtle Asian Softshell           | <.01% |
| 2389 | Chelonia, Turtle Bourret's Box             | <.01% |
| 2390 | Chelonia, Turtle Box Coahuilan             | <.01% |
| 2391 | Chelonia, Turtle Box Eastern               | <.01% |
| 2392 | Chelonia, Turtle Box Indochinese           | <.01% |
| 2393 | Chelonia, Turtle Box Mexican               | <.01% |
| 2394 | Chelonia, Turtle Box Pan's                 | <.01% |
| 2395 | Chelonia, Turtle Central American River    | <.01% |
| 2396 | Chelonia, Turtle Chinese Three-Striped Box | <.01% |
| 2397 | Chelonia, Turtle Common Box                | <.01% |
| 2398 | Chelonia, Turtle Common Snapping           | <.01% |
| 2399 | Chelonia, Turtle Desert                    | <.01% |
| 2400 | Chelonia, Turtle Eastern Box               | <.01% |
| 2401 | Chelonia, Turtle Endangered Soft-Shelled   | <.01% |
| 2402 | Chelonia, Turtle Every Genus               | <.01% |
| 2403 | Chelonia, Turtle Four-Eyed                 | <.01% |
| 2404 | Chelonia, Turtle Giant Asian Softshell     | <.01% |
| 2405 | Chelonia, Turtle Giant Softshelled         | <.01% |
| 2406 | Chelonia, Turtle Hawksbill Sea             | <.01% |
| 2407 | Chelonia, Turtle Indochinese Box           | <.01% |
| 2408 | Chelonia, Turtle Lake                      | <.01% |
| 2409 | Chelonia, Turtle Land                      | <.01% |
| 2410 | Chelonia, Turtle Large                     | <.01% |
| 2411 | Chelonia, Turtle Large River               | <.01% |
| 2412 | Chelonia, Turtle Local Snapping            | <.01% |
| 2413 | Chelonia, Turtle Mccord's Box              | <.01% |
| 2414 | Chelonia, Turtle North American Wood       | <.01% |
| 2415 | Chelonia, Turtle Ornate Box                | <.01% |
| 2416 | Chelonia, Turtle Painted                   | <.01% |
| 2417 | Chelonia, Turtle Pan's Box                 | <.01% |
| 2418 | Chelonia, Turtle Podocnemis                | <.01% |
| 2419 | Chelonia, Turtle Red River Giant Softshell | <.01% |
| 2420 | Chelonia, Turtle Rehabbed                  | <.01% |
| 2421 | Chelonia, Turtle Rescued                   | <.01% |
| 2422 | Chelonia, Turtle Saltwater                 | <.01% |
| 2423 | Chelonia, Turtle Side Neck                 | <.01% |
| 2424 | Chelonia, Turtle Slider                    | <.01% |

|      |                                                   |       |
|------|---------------------------------------------------|-------|
| 2425 | Chelonia, Turtle Southern Vietnamese Box          | <.01% |
| 2426 | Chelonia, Turtle Spiny                            | <.01% |
| 2427 | Chelonia, Turtle Sulawesi Forest                  | <.01% |
| 2428 | Chelonia, Turtle Sustainable                      | <.01% |
| 2429 | Chelonia, Turtle Threatened Freshwater            | <.01% |
| 2430 | Chelonia, Turtle Vietnamese Pond                  | <.01% |
| 2431 | Chelonia, Turtle Yellow-Bellied Slider            | <.01% |
| 2432 | Chiroptera, Bat Australian                        | <.01% |
| 2433 | Chiroptera, Bat Canyon                            | <.01% |
| 2434 | Chiroptera, Bat Egyptian Fruit                    | <.01% |
| 2435 | Chiroptera, Bat Fox Malayan Flying                | <.01% |
| 2436 | Chiroptera, Bat Fruit Balms                       | <.01% |
| 2437 | Chiroptera, Bat Hammer Head                       | <.01% |
| 2438 | Chiroptera, Bat Hawaiian Hoary                    | <.01% |
| 2439 | Chiroptera, Bat Lesser Known                      | <.01% |
| 2440 | Chiroptera, Bat Llaner Coquipacific Sheath Tailed | <.01% |
| 2441 | Chiroptera, Bat Long Tongued                      | <.01% |
| 2442 | Chiroptera, Bat Mexican Long Nose                 | <.01% |
| 2443 | Chiroptera, Bat Rafinesque's big eared            | <.01% |
| 2444 | Chondrichthyes, Guitarfish Black Chin             | <.01% |
| 2445 | Chondrichthyes, Guitarfish Bowmouth               | <.01% |
| 2446 | Chondrichthyes, Ray Black Blotch                  | <.01% |
| 2447 | Chondrichthyes, Ray Cownose                       | <.01% |
| 2448 | Chondrichthyes, Shark Bamboo                      | <.01% |
| 2449 | Chondrichthyes, Shark Benthic                     | <.01% |
| 2450 | Chondrichthyes, Shark Blue                        | <.01% |
| 2451 | Chondrichthyes, Shark Bottom Dwelling             | <.01% |
| 2452 | Chondrichthyes, Shark Brown                       | <.01% |
| 2453 | Chondrichthyes, Shark Carcharias                  | <.01% |
| 2454 | Chondrichthyes, Shark Carpet                      | <.01% |
| 2455 | Chondrichthyes, Shark Chain Dogfish               | <.01% |
| 2456 | Chondrichthyes, Shark Cookiecutter                | <.01% |
| 2457 | Chondrichthyes, Shark Frilled                     | <.01% |
| 2458 | Chondrichthyes, Shark Great Hammerhead            | <.01% |
| 2459 | Chondrichthyes, Shark Grey Reef                   | <.01% |
| 2460 | Chondrichthyes, Shark Iridescent                  | <.01% |
| 2461 | Chondrichthyes, Shark Lamnid                      | <.01% |
| 2462 | Chondrichthyes, Shark Reef                        | <.01% |
| 2463 | Chondrichthyes, Shark Requiem                     | <.01% |
| 2464 | Chondrichthyes, Shark Scalloped Hammerhead        | <.01% |
| 2465 | Chondrichthyes, Shark Small Pelagic               | <.01% |
| 2466 | Chondrichthyes, Shark Tropical Reef               | <.01% |
| 2467 | Chondrichthyes, Shark Wobbegong                   | <.01% |
| 2468 | Chondrichthyes, Shark Zebra                       | <.01% |
| 2469 | Chondrichthyes, Skate Common                      | <.01% |
| 2470 | Chondrichthyes, Stingray Atlantic                 | <.01% |
| 2471 | Chondrichthyes, Stingray Bigtoothed River         | <.01% |
| 2472 | Chondrichthyes, Stingray Giant Freshwater         | <.01% |

|      |                                                            |       |
|------|------------------------------------------------------------|-------|
| 2473 | Chondrichthyes, Stingray Saltwater                         | <.01% |
| 2474 | Chondrichthyes, Stingray Tiger River                       | <.01% |
| 2475 | Chondrichthyes, Stingray Tropical                          | <.01% |
| 2476 | Chondrichthyes, Stingray Yellow                            | <.01% |
| 2477 | Chondrichthyes, Wedgefish                                  | <.01% |
| 2478 | Crocodylia, Caiman Broad Nose                              | <.01% |
| 2479 | Crocodylia, Crocodile Chinese                              | <.01% |
| 2480 | Crocodylia, Crocodile West African Slender-Snouted         | <.01% |
| 2481 | Dermoptera, Colugo                                         | <.01% |
| 2482 | Dermoptera, Colugo Sunda                                   | <.01% |
| 2483 | Generic, Animals African Rainforest                        | <.01% |
| 2484 | Generic, Animals African Safari                            | <.01% |
| 2485 | Generic, Animals Alaska                                    | <.01% |
| 2486 | Generic, Animals Amazon                                    | <.01% |
| 2487 | Generic, Animals Amazon Rainforest                         | <.01% |
| 2488 | Generic, Animals Aquatic Endangered                        | <.01% |
| 2489 | Generic, Animals Aquatic North American                    | <.01% |
| 2490 | Generic, Animals Asian Mountain                            | <.01% |
| 2491 | Generic, Animals Burrowing                                 | <.01% |
| 2492 | Generic, Animals Captive Born                              | <.01% |
| 2493 | Generic, Animals Cave                                      | <.01% |
| 2494 | Generic, Animals Central American                          | <.01% |
| 2495 | Generic, Animals Coastal                                   | <.01% |
| 2496 | Generic, Animals Desert Large                              | <.01% |
| 2497 | Generic, Animals Easily Exhibited & Ecologically Important | <.01% |
| 2498 | Generic, Animals Endangered and Evol Distinct              | <.01% |
| 2499 | Generic, Animals Endangered Local                          | <.01% |
| 2500 | Generic, Animals Estuarine                                 | <.01% |
| 2501 | Generic, Animals Ethiopian                                 | <.01% |
| 2502 | Generic, Animals Exotic Pet Trade                          | <.01% |
| 2503 | Generic, Animals Forest                                    | <.01% |
| 2504 | Generic, Animals Herbivore                                 | <.01% |
| 2505 | Generic, Animals Hotspring                                 | <.01% |
| 2506 | Generic, Animals Kelp Forest                               | <.01% |
| 2507 | Generic, Animals Large Herding                             | <.01% |
| 2508 | Generic, Animals Large North American                      | <.01% |
| 2509 | Generic, Animals Large Ocean                               | <.01% |
| 2510 | Generic, Animals Pacific NW                                | <.01% |
| 2511 | Generic, Animals Patagonian                                | <.01% |
| 2512 | Generic, Animals Rainforest SE Asia                        | <.01% |
| 2513 | Generic, Animals Reintroduced Successfully                 | <.01% |
| 2514 | Generic, Animals Scavengers                                | <.01% |
| 2515 | Generic, Animals Small                                     | <.01% |
| 2516 | Generic, Animals Small Aquatic                             | <.01% |
| 2517 | Generic, Animals South Pacific                             | <.01% |
| 2518 | Generic, Animals Temperate                                 | <.01% |
| 2519 | Generic, Animals Terrestrial                               | <.01% |
| 2520 | Generic, Animals Terrestrial North American                | <.01% |

|      |                                                     |       |
|------|-----------------------------------------------------|-------|
| 2521 | Generic, Animals Tropical Montane                   | <.01% |
| 2522 | Generic, Animals Tundra                             | <.01% |
| 2523 | Generic, Animals Wetland                            | <.01% |
| 2524 | Generic, Aquatic Arthropods                         | <.01% |
| 2525 | Generic, Aquatic Endangered                         | <.01% |
| 2526 | Generic, Aquatic Endangered Invertebrate            | <.01% |
| 2527 | Generic, Carnivore European                         | <.01% |
| 2528 | Generic, Carnivore From Central America             | <.01% |
| 2529 | Generic, Carnivore New World                        | <.01% |
| 2530 | Generic, Carnivore Old World                        | <.01% |
| 2531 | Generic, Chordata                                   | <.01% |
| 2532 | Generic, Creatures From Volcanic Vents              | <.01% |
| 2533 | Generic, Detritivore Rainforest                     | <.01% |
| 2534 | Generic, Endangered                                 | <.01% |
| 2535 | Generic, Endangered Marine Life                     | <.01% |
| 2536 | Generic, Endangered Rare Ones That Look Interesting | <.01% |
| 2537 | Generic, Herbivore Large                            | <.01% |
| 2538 | Generic, Herbivores Small                           | <.01% |
| 2539 | Generic, Invertebrate African                       | <.01% |
| 2540 | Generic, Invertebrate Asian                         | <.01% |
| 2541 | Generic, Life Endangered Marine                     | <.01% |
| 2542 | Generic, Life Jungle                                | <.01% |
| 2543 | Generic, Mammal Native Small Medium                 | <.01% |
| 2544 | Generic, Mountain Species                           | <.01% |
| 2545 | Generic, Omnivores                                  | <.01% |
| 2546 | Generic, Prey                                       | <.01% |
| 2547 | Generic, Specialiszed Pollinators                   | <.01% |
| 2548 | Generic, Species Endangered Amazon                  | <.01% |
| 2549 | Generic, Species Endangered Ocean                   | <.01% |
| 2550 | Generic, Species Large Charismatic                  | <.01% |
| 2551 | Generic, Species Non-Endangered                     | <.01% |
| 2552 | Insectivora, Endangered                             | <.01% |
| 2553 | Insectivora, Hedgehog Four-Toed                     | <.01% |
| 2554 | Insectivora, Mammal                                 | <.01% |
| 2555 | Invertebrate, Anemome Sea                           | <.01% |
| 2556 | Invertebrate, Anemone Mushroom                      | <.01% |
| 2557 | Invertebrate, Anemone Strawberry                    | <.01% |
| 2558 | Invertebrate, Annelid                               | <.01% |
| 2559 | Invertebrate, Ant Army                              | <.01% |
| 2560 | Invertebrate, Ant Bullet                            | <.01% |
| 2561 | Invertebrate, Ant Fire                              | <.01% |
| 2562 | Invertebrate, Ant Gliding                           | <.01% |
| 2563 | Invertebrate, Ant Trap Jaw                          | <.01% |
| 2564 | Invertebrate, Appalachian Elktoe                    | <.01% |
| 2565 | Invertebrate, Aquatic Nematodes                     | <.01% |
| 2566 | Invertebrate, Asian                                 | <.01% |
| 2567 | Invertebrate, Australian Corals                     | <.01% |
| 2568 | Invertebrate, Barnacle                              | <.01% |

|      |                                                  |       |
|------|--------------------------------------------------|-------|
| 2569 | Invertebrate, Bee Carpenter                      | <.01% |
| 2570 | Invertebrate, Beetle Aloeus Ox                   | <.01% |
| 2571 | Invertebrate, Beetle Bess                        | <.01% |
| 2572 | Invertebrate, Beetle Blue Death Feigning         | <.01% |
| 2573 | Invertebrate, Beetle Cape Stag                   | <.01% |
| 2574 | Invertebrate, Beetle Darkling                    | <.01% |
| 2575 | Invertebrate, Beetle Elephant                    | <.01% |
| 2576 | Invertebrate, Beetle Endangered                  | <.01% |
| 2577 | Invertebrate, Beetle Green June                  | <.01% |
| 2578 | Invertebrate, Beetle Large                       | <.01% |
| 2579 | Invertebrate, Beetle Puritan Tiger               | <.01% |
| 2580 | Invertebrate, Beetle Water                       | <.01% |
| 2581 | Invertebrate, Bivalves                           | <.01% |
| 2582 | Invertebrate, Bug Assassin                       | <.01% |
| 2583 | Invertebrate, Bug Stink                          | <.01% |
| 2584 | Invertebrate, Bumblebee Franklins                | <.01% |
| 2585 | Invertebrate, Butterfly African                  | <.01% |
| 2586 | Invertebrate, Butterfly Amazon                   | <.01% |
| 2587 | Invertebrate, Butterfly Ant-Blue                 | <.01% |
| 2588 | Invertebrate, Butterfly Asian                    | <.01% |
| 2589 | Invertebrate, Butterfly Australian               | <.01% |
| 2590 | Invertebrate, Butterfly Blue Morpho              | <.01% |
| 2591 | Invertebrate, Butterfly Endangered Endemic       | <.01% |
| 2592 | Invertebrate, Butterfly Fritillary Regal         | <.01% |
| 2593 | Invertebrate, Butterfly Illidge's Ant-Blue       | <.01% |
| 2594 | Invertebrate, Butterfly Lange's Metalmark        | <.01% |
| 2595 | Invertebrate, Butterfly Metalmark Lange's        | <.01% |
| 2596 | Invertebrate, Butterfly Neotropical              | <.01% |
| 2597 | Invertebrate, Butterfly North America            | <.01% |
| 2598 | Invertebrate, Butterfly Palo Verdes Blue         | <.01% |
| 2599 | Invertebrate, Butterfly Palos Verdes Blue        | <.01% |
| 2600 | Invertebrate, Butterfly Prairie                  | <.01% |
| 2601 | Invertebrate, Butterfly Queen Alexandra Birdwing | <.01% |
| 2602 | Invertebrate, Butterfly Quino Checkerspot        | <.01% |
| 2603 | Invertebrate, Butterfly Silvery Blue             | <.01% |
| 2604 | Invertebrate, Cicadas                            | <.01% |
| 2605 | Invertebrate, Clam North American                | <.01% |
| 2606 | Invertebrate, Cnidaria                           | <.01% |
| 2607 | Invertebrate, Cockroach Giant                    | <.01% |
| 2608 | Invertebrate, Coelenterates                      | <.01% |
| 2609 | Invertebrate, Conch Queen                        | <.01% |
| 2610 | Invertebrate, Coneshell Cumberlandian            | <.01% |
| 2611 | Invertebrate, Coral Aquacultured                 | <.01% |
| 2612 | Invertebrate, Coral Deep Water                   | <.01% |
| 2613 | Invertebrate, Coral Elkhorn                      | <.01% |
| 2614 | Invertebrate, Coral Fan                          | <.01% |
| 2615 | Invertebrate, Coral Hairy Mushroom               | <.01% |
| 2616 | Invertebrate, Coral Montiporid                   | <.01% |

|      |                                                   |       |
|------|---------------------------------------------------|-------|
| 2617 | Invertebrate, Coral Shallow Water                 | <.01% |
| 2618 | Invertebrate, Coral Star                          | <.01% |
| 2619 | Invertebrate, Coral Tree                          | <.01% |
| 2620 | Invertebrate, Coral Tubastraea                    | <.01% |
| 2621 | Invertebrate, Crab Chesapeake Blue                | <.01% |
| 2622 | Invertebrate, Crab Fiddler                        | <.01% |
| 2623 | Invertebrate, Crab Horned Ghost                   | <.01% |
| 2624 | Invertebrate, Crab Japanese Spider                | <.01% |
| 2625 | Invertebrate, Crayfish New Zealand Giant          | <.01% |
| 2626 | Invertebrate, Crayfish Spiny                      | <.01% |
| 2627 | Invertebrate, Crayfish White Clawed               | <.01% |
| 2628 | Invertebrate, Crinoid                             | <.01% |
| 2629 | Invertebrate, Crustacean Endangered               | <.01% |
| 2630 | Invertebrate, Crustacean Oceanic                  | <.01% |
| 2631 | Invertebrate, Cuttlefish Spectacular              | <.01% |
| 2632 | Invertebrate, Dinflagellates Bioluminescent       | <.01% |
| 2633 | Invertebrate, Dumbo Jelly                         | <.01% |
| 2634 | Invertebrate, Dusky-Wing Dreamy                   | <.01% |
| 2635 | Invertebrate, Gnat                                | <.01% |
| 2636 | Invertebrate, Hornet                              | <.01% |
| 2637 | Invertebrate, Insect Aquatic                      | <.01% |
| 2638 | Invertebrate, Insect Beneficial                   | <.01% |
| 2639 | Invertebrate, Insect Desert                       | <.01% |
| 2640 | Invertebrate, Insect Ecologically Important       | <.01% |
| 2641 | Invertebrate, Insect Endemic To The Zoo's Region  | <.01% |
| 2642 | Invertebrate, Insect House                        | <.01% |
| 2643 | Invertebrate, Insect Invasive                     | <.01% |
| 2644 | Invertebrate, Insect Island Stick                 | <.01% |
| 2645 | Invertebrate, Insect Large                        | <.01% |
| 2646 | Invertebrate, Insect Native                       | <.01% |
| 2647 | Invertebrate, Insect North American               | <.01% |
| 2648 | Invertebrate, Insect Savanna                      | <.01% |
| 2649 | Invertebrate, Insect Species That Uses Camouflage | <.01% |
| 2650 | Invertebrate, Insect Stick Peruphasma             | <.01% |
| 2651 | Invertebrate, Insect Terrestrial                  | <.01% |
| 2652 | Invertebrate, Insect Tundra                       | <.01% |
| 2653 | Invertebrate, Intertidal Pacific NW               | <.01% |
| 2654 | Invertebrate, Invertebrate Marine                 | <.01% |
| 2655 | Invertebrate, Invertebrate North American         | <.01% |
| 2656 | Invertebrate, Invertebrate Popular                | <.01% |
| 2657 | Invertebrate, Isopod Giant                        | <.01% |
| 2658 | Invertebrate, Isopod Lee Cty Cave                 | <.01% |
| 2659 | Invertebrate, Jellyfish Comb                      | <.01% |
| 2660 | Invertebrate, Jellyfish Moon Jelly                | <.01% |
| 2661 | Invertebrate, Jellyfish Sea Nettle                | <.01% |
| 2662 | Invertebrate, Katydid Giant                       | <.01% |
| 2663 | Invertebrate, Keystone                            | <.01% |
| 2664 | Invertebrate, Lobster Slipper                     | <.01% |

|      |                                                 |       |
|------|-------------------------------------------------|-------|
| 2665 | Invertebrate, Lobster Squat                     | <.01% |
| 2666 | Invertebrate, Mantis Chinese                    | <.01% |
| 2667 | Invertebrate, Mantis Dead Leaf                  | <.01% |
| 2668 | Invertebrate, Moth Gypsy                        | <.01% |
| 2669 | Invertebrate, Moth Sphinx                       | <.01% |
| 2670 | Invertebrate, Mussel Fan                        | <.01% |
| 2671 | Invertebrate, Nematodes                         | <.01% |
| 2672 | Invertebrate, Nymph Jungle                      | <.01% |
| 2673 | Invertebrate, Phasmid                           | <.01% |
| 2674 | Invertebrate, Portuguese Man O' War             | <.01% |
| 2675 | Invertebrate, Prawn                             | <.01% |
| 2676 | Invertebrate, Roach South Africa                | <.01% |
| 2677 | Invertebrate, Scorpion Emperor Red Clawed       | <.01% |
| 2678 | Invertebrate, Scorpion False                    | <.01% |
| 2679 | Invertebrate, Scorpion Giant Forest             | <.01% |
| 2680 | Invertebrate, Scorpion Large                    | <.01% |
| 2681 | Invertebrate, Sea Apple                         | <.01% |
| 2682 | Invertebrate, Shrimp Longhorn fairy             | <.01% |
| 2683 | Invertebrate, Shrimp Peacock Mantis             | <.01% |
| 2684 | Invertebrate, Shrimp Tropical Reef              | <.01% |
| 2685 | Invertebrate, Slug Banana                       | <.01% |
| 2686 | Invertebrate, Snail Painted Snake-Coiled Forest | <.01% |
| 2687 | Invertebrate, Snail Plicate Rocksnail           | <.01% |
| 2688 | Invertebrate, Snail Scaly-Foot                  | <.01% |
| 2689 | Invertebrate, Spider Australian                 | <.01% |
| 2690 | Invertebrate, Spider Brazilian Wandering        | <.01% |
| 2691 | Invertebrate, Spider Brown Recluse              | <.01% |
| 2692 | Invertebrate, Spider Cave                       | <.01% |
| 2693 | Invertebrate, Spider Harvestmen                 | <.01% |
| 2694 | Invertebrate, Spider Huntsman                   | <.01% |
| 2695 | Invertebrate, Spider Jumping                    | <.01% |
| 2696 | Invertebrate, Spider Large                      | <.01% |
| 2697 | Invertebrate, Spider Red-Kneed Bird             | <.01% |
| 2698 | Invertebrate, Spider Sea                        | <.01% |
| 2699 | Invertebrate, Spider Spruce-Fir Moss            | <.01% |
| 2700 | Invertebrate, Squid Bobtail                     | <.01% |
| 2701 | Invertebrate, Star Sand                         | <.01% |
| 2702 | Invertebrate, Starfish Brittle                  | <.01% |
| 2703 | Invertebrate, Starfish Sunflower                | <.01% |
| 2704 | Invertebrate, Starfish Temperate                | <.01% |
| 2705 | Invertebrate, Stonefly Tahoe                    | <.01% |
| 2706 | Invertebrate, Tarantula Brazilian Black         | <.01% |
| 2707 | Invertebrate, Tarantula Old World               | <.01% |
| 2708 | Invertebrate, Tarantula Pink Toe                | <.01% |
| 2709 | Invertebrate, Tarantula Red Knee                | <.01% |
| 2710 | Invertebrate, Termite                           | <.01% |
| 2711 | Invertebrate, Unusual                           | <.01% |
| 2712 | Invertebrate, Weta Giant                        | <.01% |

|      |                                               |       |
|------|-----------------------------------------------|-------|
| 2713 | Invertebrate, Winged                          | <.01% |
| 2714 | Invertebrate, Worms Feather Duster            | <.01% |
| 2715 | Lagomorpha, Rabbit Angora                     | <.01% |
| 2716 | Lagomorpha, Rabbit Giant                      | <.01% |
| 2717 | Lagomorpha, Rabbit Pygmy                      | <.01% |
| 2718 | Mammalia, Mammal Arctic                       | <.01% |
| 2719 | Mammalia, Mammal Asian                        | <.01% |
| 2720 | Mammalia, Mammal Charismatic                  | <.01% |
| 2721 | Mammalia, Mammal European                     | <.01% |
| 2722 | Mammalia, Mammal Ground                       | <.01% |
| 2723 | Mammalia, Mammal Hooved                       | <.01% |
| 2724 | Mammalia, Mammal Malagasy                     | <.01% |
| 2725 | Mammalia, Mammal Marine Pacific Coast         | <.01% |
| 2726 | Mammalia, Mammal Marine Rescued               | <.01% |
| 2727 | Mammalia, Mammal Nocturnal                    | <.01% |
| 2728 | Mammalia, Mammal North American               | <.01% |
| 2729 | Mammalia, Mammal Small Tropical               | <.01% |
| 2730 | Mammalia, Mammal South American               | <.01% |
| 2731 | Mammalia, Mammal Terrestrial                  | <.01% |
| 2732 | Mammalia, Mammal Tropical                     | <.01% |
| 2733 | Mammalia, Mammal Tundra                       | <.01% |
| 2734 | Marsupialia, Bandicoot Eastern Barred         | <.01% |
| 2735 | Marsupialia, Bandicoot Pig Footed             | <.01% |
| 2736 | Marsupialia, Bettong Brush Tailed             | <.01% |
| 2737 | Marsupialia, Bilby                            | <.01% |
| 2738 | Marsupialia, Cuscus                           | <.01% |
| 2739 | Marsupialia, Dibbler                          | <.01% |
| 2740 | Marsupialia, Marsupial Australian             | <.01% |
| 2741 | Marsupialia, Marsupial Large                  | <.01% |
| 2742 | Marsupialia, Potoroo                          | <.01% |
| 2743 | Marsupialia, Wallaby Rock                     | <.01% |
| 2744 | Marsupialia, Wallaby Rufous Hare              | <.01% |
| 2745 | Perissodactyla, Donkey African Wild           | <.01% |
| 2746 | Perissodactyla, Donkey Domestic               | <.01% |
| 2747 | Perissodactyla, Horse American Heritage Breed | <.01% |
| 2748 | Perissodactyla, Kiang                         | <.01% |
| 2749 | Perissodactyla, Rhinoceros Endangered         | <.01% |
| 2750 | Pisces, Anglerfish                            | <.01% |
| 2751 | Pisces, Armored Catfish                       | <.01% |
| 2752 | Pisces, Bass Largemouth                       | <.01% |
| 2753 | Pisces, Billfish                              | <.01% |
| 2754 | Pisces, Bowfins                               | <.01% |
| 2755 | Pisces, Catfish Redtail                       | <.01% |
| 2756 | Pisces, Chromis Blue                          | <.01% |
| 2757 | Pisces, Chromis Green                         | <.01% |
| 2758 | Pisces, Cichlid Lake Malawi                   | <.01% |
| 2759 | Pisces, Cichlid Midas                         | <.01% |
| 2760 | Pisces, Cichlid Pintstrip Damba               | <.01% |

|      |                                                         |       |
|------|---------------------------------------------------------|-------|
| 2761 | Pisces, Cichlid South American                          | <.01% |
| 2762 | Pisces, Cowfish Longhorn                                | <.01% |
| 2763 | Pisces, Damselfish Shadow                               | <.01% |
| 2764 | Pisces, Dogfish Spiny                                   | <.01% |
| 2765 | Pisces, Fish Ancient                                    | <.01% |
| 2766 | Pisces, Fish Angelfish                                  | <.01% |
| 2767 | Pisces, Fish Atlantic                                   | <.01% |
| 2768 | Pisces, Fish Atlantic Pelagic                           | <.01% |
| 2769 | Pisces, Fish Atlantic Reef                              | <.01% |
| 2770 | Pisces, Fish Atlantic Tarpon                            | <.01% |
| 2771 | Pisces, Fish Australian Exhibit                         | <.01% |
| 2772 | Pisces, Fish Australian Rainbow                         | <.01% |
| 2773 | Pisces, Fish Australian Reef                            | <.01% |
| 2774 | Pisces, Fish Bannerfish                                 | <.01% |
| 2775 | Pisces, Fish Batfish                                    | <.01% |
| 2776 | Pisces, Fish Bay                                        | <.01% |
| 2777 | Pisces, Fish Blue                                       | <.01% |
| 2778 | Pisces, Fish Bonytongue                                 | <.01% |
| 2779 | Pisces, Fish Butterfly                                  | <.01% |
| 2780 | Pisces, Fish Captive-Bred Reef                          | <.01% |
| 2781 | Pisces, Fish Cardinal                                   | <.01% |
| 2782 | Pisces, Fish Caribbean                                  | <.01% |
| 2783 | Pisces, Fish Carp                                       | <.01% |
| 2784 | Pisces, Fish Carribean                                  | <.01% |
| 2785 | Pisces, Fish China Rock                                 | <.01% |
| 2786 | Pisces, Fish Chub                                       | <.01% |
| 2787 | Pisces, Fish Clown Trigger                              | <.01% |
| 2788 | Pisces, Fish Coastal                                    | <.01% |
| 2789 | Pisces, Fish Cod Potato                                 | <.01% |
| 2790 | Pisces, Fish Colorful Ocean                             | <.01% |
| 2791 | Pisces, Fish Common Sawfish                             | <.01% |
| 2792 | Pisces, Fish Cowfish                                    | <.01% |
| 2793 | Pisces, Fish Critically Endangered Fresh And Salt Water | <.01% |
| 2794 | Pisces, Fish Croaker                                    | <.01% |
| 2795 | Pisces, Fish Cutthroat Trout                            | <.01% |
| 2796 | Pisces, Fish Damsel                                     | <.01% |
| 2797 | Pisces, Fish Darter Native                              | <.01% |
| 2798 | Pisces, Fish Devil's Hole Pup                           | <.01% |
| 2799 | Pisces, Fish Discus                                     | <.01% |
| 2800 | Pisces, Fish Ecologically Significant Species           | <.01% |
| 2801 | Pisces, Fish Eel Coral Reef                             | <.01% |
| 2802 | Pisces, Fish Eel Large                                  | <.01% |
| 2803 | Pisces, Fish Eel Marine                                 | <.01% |
| 2804 | Pisces, Fish Eel Moray California                       | <.01% |
| 2805 | Pisces, Fish Endemic Stream                             | <.01% |
| 2806 | Pisces, Fish European                                   | <.01% |
| 2807 | Pisces, Fish Exotic Salt Water                          | <.01% |
| 2808 | Pisces, Fish Flat                                       | <.01% |

|      |                                               |       |
|------|-----------------------------------------------|-------|
| 2809 | Pisces, Fish Ghost Catfish                    | <.01% |
| 2810 | Pisces, Fish Grouper Nassau                   | <.01% |
| 2811 | Pisces, Fish Grouper Warsaw                   | <.01% |
| 2812 | Pisces, Fish Guitar                           | <.01% |
| 2813 | Pisces, Fish Kelp Forest                      | <.01% |
| 2814 | Pisces, Fish King                             | <.01% |
| 2815 | Pisces, Fish Lake                             | <.01% |
| 2816 | Pisces, Fish Large And Small                  | <.01% |
| 2817 | Pisces, Fish Large Freshwater                 | <.01% |
| 2818 | Pisces, Fish Large Predatory                  | <.01% |
| 2819 | Pisces, Fish Leon Springs Pupfish             | <.01% |
| 2820 | Pisces, Fish Lumpfish                         | <.01% |
| 2821 | Pisces, Fish Mackerel                         | <.01% |
| 2822 | Pisces, Fish Mangrove                         | <.01% |
| 2823 | Pisces, Fish Marine Ornamental                | <.01% |
| 2824 | Pisces, Fish Minnow                           | <.01% |
| 2825 | Pisces, Fish Minnow Rio Grande Silvery        | <.01% |
| 2826 | Pisces, Fish Minnow Top                       | <.01% |
| 2827 | Pisces, Fish Moony                            | <.01% |
| 2828 | Pisces, Fish Narrow Sawfish                   | <.01% |
| 2829 | Pisces, Fish Native Freshwater                | <.01% |
| 2830 | Pisces, Fish Native North American Freshwater | <.01% |
| 2831 | Pisces, Fish North American Salmon            | <.01% |
| 2832 | Pisces, Fish North American Stream            | <.01% |
| 2833 | Pisces, Fish Oarfish                          | <.01% |
| 2834 | Pisces, Fish Pacific                          | <.01% |
| 2835 | Pisces, Fish Pacific Pelagic                  | <.01% |
| 2836 | Pisces, Fish Pacific Reef                     | <.01% |
| 2837 | Pisces, Fish Pecos Pupfish                    | <.01% |
| 2838 | Pisces, Fish Pelagic                          | <.01% |
| 2839 | Pisces, Fish Pike                             | <.01% |
| 2840 | Pisces, Fish Polar                            | <.01% |
| 2841 | Pisces, Fish Porcupine                        | <.01% |
| 2842 | Pisces, Fish Predatory                        | <.01% |
| 2843 | Pisces, Fish Puffer Porcupine                 | <.01% |
| 2844 | Pisces, Fish Queen Triggerfish                | <.01% |
| 2845 | Pisces, Fish Ratfish                          | <.01% |
| 2846 | Pisces, Fish Red                              | <.01% |
| 2847 | Pisces, Fish Regional Species Aquarium        | <.01% |
| 2848 | Pisces, Fish RockFish, Sebastidae             | <.01% |
| 2849 | Pisces, Fish Salmon Alaskan                   | <.01% |
| 2850 | Pisces, Fish Salmon Coho                      | <.01% |
| 2851 | Pisces, Fish Salmon King                      | <.01% |
| 2852 | Pisces, Fish Schooling Marine                 | <.01% |
| 2853 | Pisces, Fish Schooling Pelagic                | <.01% |
| 2854 | Pisces, Fish Sea Horses And Pipe              | <.01% |
| 2855 | Pisces, Fish Shiner Native                    | <.01% |
| 2856 | Pisces, Fish Siamese Fighting                 | <.01% |

|      |                                                     |       |
|------|-----------------------------------------------------|-------|
| 2857 | Pisces, Fish Small Coral Reef                       | <.01% |
| 2858 | Pisces, Fish Small Selection Of From Each Continent | <.01% |
| 2859 | Pisces, Fish Small Temperate                        | <.01% |
| 2860 | Pisces, Fish Small, Colorful, Schooling Freshwater  | <.01% |
| 2861 | Pisces, Fish Snake Head                             | <.01% |
| 2862 | Pisces, Fish South American Lung                    | <.01% |
| 2863 | Pisces, Fish Spiny                                  | <.01% |
| 2864 | Pisces, Fish Striped Burrfish                       | <.01% |
| 2865 | Pisces, Fish Sturgeon Atlantic                      | <.01% |
| 2866 | Pisces, Fish Sturgeon Russian                       | <.01% |
| 2867 | Pisces, Fish Sustainable Populations                | <.01% |
| 2868 | Pisces, Fish Temperate Marine                       | <.01% |
| 2869 | Pisces, Fish Temperate Rockfish                     | <.01% |
| 2870 | Pisces, Fish Tropical Schooling                     | <.01% |
| 2871 | Pisces, Fish US Native SunFish                      | <.01% |
| 2872 | Pisces, Fish Very Large Amazonian                   | <.01% |
| 2873 | Pisces, Fish Warm Water                             | <.01% |
| 2874 | Pisces, Fish Wrass Blue Head                        | <.01% |
| 2875 | Pisces, Fish Wrass Napoleon                         | <.01% |
| 2876 | Pisces, Fish Yelloweye Rock                         | <.01% |
| 2877 | Pisces, Fish Yellowfish                             | <.01% |
| 2878 | Pisces, Gar Alligator                               | <.01% |
| 2879 | Pisces, Gar Longnose                                | <.01% |
| 2880 | Pisces, Giant Pangasius                             | <.01% |
| 2881 | Pisces, Goby Neon                                   | <.01% |
| 2882 | Pisces, Grouper Peacock                             | <.01% |
| 2883 | Pisces, Herring                                     | <.01% |
| 2884 | Pisces, Large Amazon                                | <.01% |
| 2885 | Pisces, Minnows & Shiners Native                    | <.01% |
| 2886 | Pisces, Piranha Red Bellied                         | <.01% |
| 2887 | Pisces, Roughy Orange                               | <.01% |
| 2888 | Pisces, Sculpin                                     | <.01% |
| 2889 | Pisces, Sucker June                                 | <.01% |
| 2890 | Pisces, Tang                                        | <.01% |
| 2891 | Pisces, Tautog                                      | <.01% |
| 2892 | Pisces, Teleosts                                    | <.01% |
| 2893 | Pisces, Toothcarp Valencia                          | <.01% |
| 2894 | Pisces, Trigger Queen                               | <.01% |
| 2895 | Primates, Ape Endangered                            | <.01% |
| 2896 | Primates, Arboreal                                  | <.01% |
| 2897 | Primates, Baboon Hamadryas                          | <.01% |
| 2898 | Primates, Capuchin Brown                            | <.01% |
| 2899 | Primates, Central America                           | <.01% |
| 2900 | Primates, Chimpanzee Western                        | <.01% |
| 2901 | Primates, Gibbon Hoolock                            | <.01% |
| 2902 | Primates, Gibbon Silvery                            | <.01% |
| 2903 | Primates, Gorilla Eastern Lowland                   | <.01% |
| 2904 | Primates, Gorilla Forest                            | <.01% |

|      |                                                 |       |
|------|-------------------------------------------------|-------|
| 2905 | Primates, Langur Asian                          | <.01% |
| 2906 | Primates, Lemur Blue Eyed Black                 | <.01% |
| 2907 | Primates, Lemur Common Brown                    | <.01% |
| 2908 | Primates, Lemur Ruffed                          | <.01% |
| 2909 | Primates, Lemur Sifaka Coquerels                | <.01% |
| 2910 | Primates, Lemur Sifaka Eastern                  | <.01% |
| 2911 | Primates, Lesser                                | <.01% |
| 2912 | Primates, Mangabey Black                        | <.01% |
| 2913 | Primates, Marmoset Golden                       | <.01% |
| 2914 | Primates, Mid-Size                              | <.01% |
| 2915 | Primates, Monkey Allen's Swamp                  | <.01% |
| 2916 | Primates, Monkey Black Howler                   | <.01% |
| 2917 | Primates, Monkey Black Spider                   | <.01% |
| 2918 | Primates, Monkey Blue                           | <.01% |
| 2919 | Primates, Monkey Brown Spider                   | <.01% |
| 2920 | Primates, Monkey Capuchin White Face            | <.01% |
| 2921 | Primates, Monkey East Asian                     | <.01% |
| 2922 | Primates, Monkey Goeldi's                       | <.01% |
| 2923 | Primates, Monkey Golden                         | <.01% |
| 2924 | Primates, Monkey Guenon Schmidt's Red Tailed    | <.01% |
| 2925 | Primates, Monkey Large                          | <.01% |
| 2926 | Primates, Monkey Muriquis                       | <.01% |
| 2927 | Primates, Monkey Rhesus                         | <.01% |
| 2928 | Primates, Monkey Silvery Lutung                 | <.01% |
| 2929 | Primates, Monkey Snub-Nosed                     | <.01% |
| 2930 | Primates, Monkey Southeast Asian                | <.01% |
| 2931 | Primates, Monkey Syke's                         | <.01% |
| 2932 | Primates, Monkey Tiny                           | <.01% |
| 2933 | Primates, Monkey Venezuelan Red Howler          | <.01% |
| 2934 | Primates, New World Endangered                  | <.01% |
| 2935 | Primates, Old World Endangered                  | <.01% |
| 2936 | Primates, Orangutan Malaysian                   | <.01% |
| 2937 | Primates, Orangutan Tapanuli                    | <.01% |
| 2938 | Primates, Primate Asian                         | <.01% |
| 2939 | Primates, Primate Rainforest                    | <.01% |
| 2940 | Primates, Small Nocturnal                       | <.01% |
| 2941 | Primates, Small/Medium Attractive               | <.01% |
| 2942 | Primates, Tamarin Black Lion                    | <.01% |
| 2943 | Reptile, Aquatic Reptiles                       | <.01% |
| 2944 | Reptile, Australian Reptiles                    | <.01% |
| 2945 | Reptilia, Reptile and Amphibian Rainforest      | <.01% |
| 2946 | Reptilia, Reptile and Amphibians Asian          | <.01% |
| 2947 | Reptilia, Reptile and Amphibians Malagasy       | <.01% |
| 2948 | Reptilia, Reptile and Amphibians Native         | <.01% |
| 2949 | Reptilia, Reptile and Amphibians North American | <.01% |
| 2950 | Reptilia, Reptile Arboreal                      | <.01% |
| 2951 | Reptilia, Reptile European                      | <.01% |
| 2952 | Reptilia, Reptile Local                         | <.01% |

|      |                                             |       |
|------|---------------------------------------------|-------|
| 2953 | Reptilia, Reptile Nonvenomous               | <.01% |
| 2954 | Reptilia, Reptile Savanna                   | <.01% |
| 2955 | Reptilia, Reptile Terrestrial               | <.01% |
| 2956 | Reptilia, Reptile Tundra                    | <.01% |
| 2957 | Reptilia, Reptile Unique                    | <.01% |
| 2958 | Rodentia, Acouchi                           | <.01% |
| 2959 | Rodentia, Beaver Mongolian                  | <.01% |
| 2960 | Rodentia, Degu                              | <.01% |
| 2961 | Rodentia, Dog Prairie Mexican               | <.01% |
| 2962 | Rodentia, Gerbil                            | <.01% |
| 2963 | Rodentia, Gopher                            | <.01% |
| 2964 | Rodentia, Hutia                             | <.01% |
| 2965 | Rodentia, Jerboa                            | <.01% |
| 2966 | Rodentia, Large Rodents                     | <.01% |
| 2967 | Rodentia, Mouse Domestic                    | <.01% |
| 2968 | Rodentia, Mouse European Harvest            | <.01% |
| 2969 | Rodentia, Mouse Field                       | <.01% |
| 2970 | Rodentia, Mouse Grasshopper                 | <.01% |
| 2971 | Rodentia, Mouse Spiny                       | <.01% |
| 2972 | Rodentia, Muskrat                           | <.01% |
| 2973 | Rodentia, Nutria                            | <.01% |
| 2974 | Rodentia, Porcupine African Crested         | <.01% |
| 2975 | Rodentia, Porcupine Asian                   | <.01% |
| 2976 | Rodentia, Porcupine Bristle-Spined          | <.01% |
| 2977 | Rodentia, Porcupine Cape                    | <.01% |
| 2978 | Rodentia, Porcupine Coendu                  | <.01% |
| 2979 | Rodentia, Porcupine Hystrix                 | <.01% |
| 2980 | Rodentia, Rat African Jumping               | <.01% |
| 2981 | Rodentia, Rat Malagasy Giant                | <.01% |
| 2982 | Rodentia, Rat Pack                          | <.01% |
| 2983 | Rodentia, Rat Tree Red Crested              | <.01% |
| 2984 | Rodentia, Rat Wood Key Largo                | <.01% |
| 2985 | Rodentia, Rodents Endangered North American | <.01% |
| 2986 | Rodentia, Springhaas                        | <.01% |
| 2987 | Rodentia, Squirrel Asian                    | <.01% |
| 2988 | Rodentia, Squirrel Fox                      | <.01% |
| 2989 | Rodentia, Squirrel Ground                   | <.01% |
| 2990 | Rodentia, Vole                              | <.01% |
| 2991 | Sirenia, Manatee Amazonian                  | <.01% |
| 2992 | Sirenia, Manatee Florida                    | <.01% |
| 2993 | Squamata, Ackie Red Yellow                  | <.01% |
| 2994 | Squamata, Boa Amazon Tree                   | <.01% |
| 2995 | Squamata, Boa Dumeril's                     | <.01% |
| 2996 | Squamata, Boa Kenyan Sand                   | <.01% |
| 2997 | Squamata, Boa Madagascar Ground             | <.01% |
| 2998 | Squamata, Boa Rosy                          | <.01% |
| 2999 | Squamata, Chameleon Lesser                  | <.01% |
| 3000 | Squamata, Chameleon Malagasy                | <.01% |

|      |                                           |       |
|------|-------------------------------------------|-------|
| 3001 | Squamata, Chameleon Minute Leaf           | <.01% |
| 3002 | Squamata, Chameleon Panther               | <.01% |
| 3003 | Squamata, Chameleon Pygmy                 | <.01% |
| 3004 | Squamata, Chameleon Rhampholeon Hattinghi | <.01% |
| 3005 | Squamata, Chameleon Tarzan                | <.01% |
| 3006 | Squamata, Cobra Black And White Spitting  | <.01% |
| 3007 | Squamata, Cobra Endangered                | <.01% |
| 3008 | Squamata, Gecko Chinese Cave              | <.01% |
| 3009 | Squamata, Gecko Giant Bronze              | <.01% |
| 3010 | Squamata, Gecko Golden Spiny Tail         | <.01% |
| 3011 | Squamata, Gecko Malagasy                  | <.01% |
| 3012 | Squamata, Gecko New Caledonia Giant       | <.01% |
| 3013 | Squamata, Gecko Standings Day             | <.01% |
| 3014 | Squamata, Gecko Tokay                     | <.01% |
| 3015 | Squamata, Gecko Western Chameleon         | <.01% |
| 3016 | Squamata, Iguana Barrington Land          | <.01% |
| 3017 | Squamata, Iguana Cuban                    | <.01% |
| 3018 | Squamata, Iguana Fiji Crested             | <.01% |
| 3019 | Squamata, Iguana Fiji Island              | <.01% |
| 3020 | Squamata, Iguana New World                | <.01% |
| 3021 | Squamata, Iguana Rock Endangered          | <.01% |
| 3022 | Squamata, Lizard Anole                    | <.01% |
| 3023 | Squamata, Lizard Anole Honduran Giant     | <.01% |
| 3024 | Squamata, Lizard Asian Water Monitor      | <.01% |
| 3025 | Squamata, Lizard Chinese Crocodile        | <.01% |
| 3026 | Squamata, Lizard Colorful                 | <.01% |
| 3027 | Squamata, Lizard Cordylid                 | <.01% |
| 3028 | Squamata, Lizard Desert                   | <.01% |
| 3029 | Squamata, Lizard Emerald Tree Monitor     | <.01% |
| 3030 | Squamata, Lizard Forest                   | <.01% |
| 3031 | Squamata, Lizard Gila Beaded              | <.01% |
| 3032 | Squamata, Lizard Legless                  | <.01% |
| 3033 | Squamata, Lizard Monitor Spiny Tail       | <.01% |
| 3034 | Squamata, Lizard North America            | <.01% |
| 3035 | Squamata, Lizard Perentie Monitor         | <.01% |
| 3036 | Squamata, Lizard Sailfin                  | <.01% |
| 3037 | Squamata, Lizard Southeast Asia           | <.01% |
| 3038 | Squamata, Lizard Spineless Forest         | <.01% |
| 3039 | Squamata, Lizard Spiny-Toed               | <.01% |
| 3040 | Squamata, Lizard Thorny Devil             | <.01% |
| 3041 | Squamata, Lizard Whiptail                 | <.01% |
| 3042 | Squamata, Megafauna African               | <.01% |
| 3043 | Squamata, Monitor African                 | <.01% |
| 3044 | Squamata, Monitor Bornean Earless         | <.01% |
| 3045 | Squamata, Monitor Desert                  | <.01% |
| 3046 | Squamata, Monitor Gray's                  | <.01% |
| 3047 | Squamata, Monitor Perentie                | <.01% |
| 3048 | Squamata, Monitor Philippine Fruit Eating | <.01% |

|      |                                                |       |
|------|------------------------------------------------|-------|
| 3049 | Squamata, Monitor Savannah                     | <.01% |
| 3050 | Squamata, Python Arboreal                      | <.01% |
| 3051 | Squamata, Python Black-Headed                  | <.01% |
| 3052 | Squamata, Python Blood                         | <.01% |
| 3053 | Squamata, Python Timor                         | <.01% |
| 3054 | Squamata, Python Tree                          | <.01% |
| 3055 | Squamata, Rattlesnake Aruba Island             | <.01% |
| 3056 | Squamata, Skink Christmas Island Whiptail      | <.01% |
| 3057 | Squamata, Skink Legless Burrowing              | <.01% |
| 3058 | Squamata, Skink Mole Blue Tailed               | <.01% |
| 3059 | Squamata, Skink Round Island                   | <.01% |
| 3060 | Squamata, Skink Shingleback                    | <.01% |
| 3061 | Squamata, Snake African Egg-Eating             | <.01% |
| 3062 | Squamata, Snake African Savanna                | <.01% |
| 3063 | Squamata, Snake Australian                     | <.01% |
| 3064 | Squamata, Snake Colorful                       | <.01% |
| 3065 | Squamata, Snake Dusky Sea                      | <.01% |
| 3066 | Squamata, Snake Fer-de-lance                   | <.01% |
| 3067 | Squamata, Snake Flying                         | <.01% |
| 3068 | Squamata, Snake Forest                         | <.01% |
| 3069 | Squamata, Snake From Africa/Asia               | <.01% |
| 3070 | Squamata, Snake Garden                         | <.01% |
| 3071 | Squamata, Snake Giant Garter                   | <.01% |
| 3072 | Squamata, Snake Gray-Banded Kingsnake          | <.01% |
| 3073 | Squamata, Snake Grey Rat                       | <.01% |
| 3074 | Squamata, Snake Local                          | <.01% |
| 3075 | Squamata, Snake Madagascar Blind               | <.01% |
| 3076 | Squamata, Snake Mountian Rattle                | <.01% |
| 3077 | Squamata, Snake Native Non-Venomous            | <.01% |
| 3078 | Squamata, Snake Neotropical                    | <.01% |
| 3079 | Squamata, Snake North American Threatened      | <.01% |
| 3080 | Squamata, Snake Racer                          | <.01% |
| 3081 | Squamata, Snake Racer Speckled                 | <.01% |
| 3082 | Squamata, Snake Roatan Coral                   | <.01% |
| 3083 | Squamata, Snake Rough-Backed Litter            | <.01% |
| 3084 | Squamata, Snake Small Native                   | <.01% |
| 3085 | Squamata, Snake Small Venomous                 | <.01% |
| 3086 | Squamata, Snake Tiger Rat                      | <.01% |
| 3087 | Squamata, Snake Timber Rattlesnake             | <.01% |
| 3088 | Squamata, Snake Tropical                       | <.01% |
| 3089 | Squamata, Snake Venomous Endangered            | <.01% |
| 3090 | Squamata, Snake Viper African Gaboon           | <.01% |
| 3091 | Squamata, Snake Viper Arboreal                 | <.01% |
| 3092 | Squamata, Snake Viper Bush                     | <.01% |
| 3093 | Squamata, Snake Viper Common European          | <.01% |
| 3094 | Squamata, Snake Viper Eastern European Species | <.01% |
| 3095 | Squamata, Snake Viper Ethiopian Mountain       | <.01% |
| 3096 | Squamata, Snake Viper Horned Pit               | <.01% |

|      |                                                         |       |
|------|---------------------------------------------------------|-------|
| 3097 | Squamata, Snake Viper Multiple Species Of Colorful      | <.01% |
| 3098 | Squamata, Snake Viper New World                         | <.01% |
| 3099 | Squamata, Snake Viper Pit Central American Cloud Forest | <.01% |
| 3100 | Squamata, Snake Viper Sahara Sand                       | <.01% |
| 3101 | Squamata, Snake Viper Sand                              | <.01% |
| 3102 | Squamata, Snake Viper Saw Scaled                        | <.01% |
| 3103 | Squamata, Snake Viper Usambara Eyelash                  | <.01% |
| 3104 | Squamata, Snake Western Ground                          | <.01% |
| 3105 | Squamata, Snake Yellow-Bellied Sea                      | <.01% |
| 3106 | Squamata, Snakes Sidewinder                             | <.01% |
| 3107 | Xenarthra, Armadillo Nine-Banded                        | <.01% |
| 3108 | Xenarthra, Armadillo Six-Banded                         | <.01% |
| 3109 | Xenarthra, Armadillo South America                      | <.01% |
| 3110 | Xenarthra, Endangered                                   | <.01% |
| 3111 | Xenarthra, Pangolin Chinese                             | <.01% |
| 3112 | Xenarthra, Pangolin Giant                               | <.01% |
| 3113 | Xenarthra, Pangolin Long tailed                         | <.01% |
| 3114 | Xenarthra, Pangolin Sunda                               | <.01% |
| 3115 | Xenarthra, Pangolin Temminck's Ground                   | <.01% |
| 3116 | Xenarthra, Pangolin Tree                                | <.01% |
| 3117 | Xenarthra, Sloth Rainforest Threatened                  | <.01% |
