# Supplementary material
Source: MDPI journal article supplement (https://www.mdpi.com/2673-5636/5/2/11)
Supplement: s1 [file s1]

**Supplementary Material Table S2: The public's and directors' priority species**

Public's Top 3 animals they hope to see when visiting a zoo or aquarium they haven't been to before (n=2820 votes cast)

| Rank | Animal       | % Votes |
|------|--------------|---------|
| 1    | Lion         | 14.61   |
| 2    | Elephant     | 11.31   |
| 3    | Tiger        | 11.10   |
| 4    | Giraffe      | 8.55    |
| 5    | Monkey       | 8.51    |
| 6    | Bear         | 4.89    |
| 7    | Gorilla      | 3.94    |
| 8    | Panda Giant  | 3.12    |
| 9    | Zebra        | 2.20    |
| 10   | Penguin      | 2.13    |
| 11   | Bear Polar   | 2.02    |
| 12   | Bird         | 1.84    |
| 13   | Snake        | 1.56    |
| 14   | Rhinoceros   | 1.42    |
| 15   | Hippopotamus | 1.35    |
| 16   | Ape          | 1.03    |
| 17   | Koala        | 0.99    |
| 18   | Wolf         | 0.85    |
| 19   | Cheetah      | 0.82    |
| 20   | Fish         | 0.78    |
| 21   | Dolphin      | 0.71    |
| 22   | Kangaroo     | 0.71    |
| 23   | Seal         | 0.67    |
| 24   | Cat Big      | 0.53    |
| 25   | Leopard      | 0.50    |
| 26   | Otter        | 0.50    |
| 27   | Tiger Bengal | 0.50    |
| 28   | Panther      | 0.46    |
| 29   | Alligator    | 0.43    |
| 30   | Reptile      | 0.43    |
| 31   | Flamingo     | 0.39    |
| 32   | Shark        | 0.39    |
| 33   | Chimpanzee   | 0.35    |
| 34   | Lion Sea     | 0.35    |
| 35   | Cougar       | 0.32    |
| 36   | Eagle        | 0.32    |
| 37   | Leopard Snow | 0.28    |
| 38   | Primate      | 0.28    |
| 39   | Sloth        | 0.28    |
| 40   | Turtle       | 0.28    |
| 41   | Bison        | 0.25    |
| 42   | Meerkat      | 0.25    |
| 43   | Orangutan    | 0.25    |
| 44   | Owl          | 0.25    |

Director's Top 5 species most important for their guest experience (n=646 votes cast)

| Rank | Animal               | % Votes |
|------|----------------------|---------|
| 1    | Giraffe              | 9.91    |
| 2    | Elephant             | 6.04    |
| 3    | Tiger                | 4.33    |
| 4    | Lion                 | 4.18    |
| 5    | Otter River          | 3.41    |
| 6    | Panda Red            | 3.10    |
| 7    | Penguin              | 2.94    |
| 8    | Rhinoceros           | 2.79    |
| 9    | Gorilla              | 2.63    |
| 10   | Shark                | 2.01    |
| 11   | Californian Sea Lion | 2.01    |
| 12   | Bear                 | 1.70    |
| 13   | Cat Big              | 1.70    |
| 14   | Orangutan            | 1.70    |
| 15   | Primate              | 1.70    |
| 16   | Bird                 | 1.55    |
| 17   | Bear Polar           | 1.24    |
| 18   | Cheetah              | 1.24    |
| 19   | Alligator            | 1.08    |
| 20   | Ape Great            | 2.17    |
| 21   | Lion African         | 1.08    |
| 22   | Reptile              | 1.08    |
| 23   | Jellyfish            | 0.93    |
| 24   | Turtle Sea           | 0.93    |
| 25   | Zebra                | 0.93    |
| 26   | Animals Domesticated | 0.77    |
| 27   | Bear Black           | 0.77    |
| 28   | Cougar               | 0.77    |
| 29   | Eagle Bald           | 0.77    |
| 30   | Goat                 | 0.77    |
| 31   | Rhinoceros Black     | 0.77    |
| 32   | Shark Sand Tiger     | 0.77    |
| 33   | Camel Bactrian       | 0.62    |
| 34   | Chimpanzee           | 0.62    |
| 35   | Dragon Komodo        | 0.62    |
| 36   | Leopard Snow         | 0.62    |
| 37   | Monkey               | 0.62    |
| 38   | Rhinoceros White     | 0.62    |
| 39   | Stingray             | 0.62    |
| 40   | Wolf Red             | 0.62    |
| 41   | Bison                | 0.46    |
| 42   | Dog Prairie          | 0.46    |
| 43   | Dolphin              | 0.46    |
| 44   | Fish Seahorse        | 0.46    |

|    |                  |      |
|----|------------------|------|
| 45 | Panda Red        | 0.25 |
| 46 | Bird Exotic      | 0.21 |
| 47 | Butterfly        | 0.21 |
| 48 | Camel            | 0.21 |
| 49 | Cat              | 0.21 |
| 50 | Llama            | 0.21 |
| 51 | Crocodile        | 0.18 |
| 52 | Deer             | 0.18 |
| 53 | Komodo Dragon    | 0.18 |
| 54 | Peacock          | 0.18 |
| 55 | Fox              | 0.14 |
| 56 | Goat             | 0.14 |
| 57 | Horse            | 0.14 |
| 58 | Otter Sea        | 0.14 |
| 59 | Parrot           | 0.14 |
| 60 | Pig              | 0.14 |
| 61 | Sheep            | 0.14 |
| 62 | Alpaca           | 0.11 |
| 63 | Bear Grizzly     | 0.11 |
| 64 | Cat Wildcat      | 0.14 |
| 65 | Cow              | 0.11 |
| 66 | Jaguar           | 0.11 |
| 67 | Python           | 0.11 |
| 68 | Rhinoceros Black | 0.11 |
| 69 | Tapir            | 0.11 |
| 70 | Tiger Amur       | 0.11 |
| 71 | Whale            | 0.11 |
| 72 | Anaconda         | 0.07 |
| 73 | Antelope         | 0.07 |
| 74 | Ape Great        | 0.07 |
| 75 | Bat              | 0.07 |
| 76 | Dog              | 0.07 |
| 77 | Dragon Komodo    | 0.07 |
| 78 | Hyena            | 0.07 |
| 79 | Lizard           | 0.07 |
| 80 | Ostrich          | 0.07 |
| 81 | Panther Black    | 0.07 |
| 82 | Raccoon          | 0.07 |
| 83 | Stingray         | 0.07 |
| 84 | Animals Domestic | 0.04 |
| 85 | Anoles           | 0.04 |
| 86 | Anteater         | 0.04 |
| 87 | Baboon           | 0.04 |
| 88 | Badger           | 0.04 |
| 89 | Binturong        | 0.04 |
| 90 | Bird Native      | 0.04 |
| 91 | Black Mamba      | 0.04 |
| 92 | Blacktailed Deer | 0.04 |

|    |                       |      |
|----|-----------------------|------|
| 45 | Gibbon                | 0.46 |
| 46 | Hippopotamus          | 0.46 |
| 47 | Jaguar                | 0.46 |
| 48 | Meerkat               | 0.46 |
| 49 | Penguin African       | 0.46 |
| 50 | Ray                   | 0.46 |
| 51 | Rhinoceros Indian     | 0.46 |
| 52 | Sloth                 | 0.46 |
| 53 | Tiger Amur            | 0.46 |
| 54 | Wolf Gray             | 0.46 |
| 55 | Wolf Mexican Gray     | 0.46 |
| 56 | Bear Grizzly          | 0.31 |
| 57 | Butterfly Tropical    | 0.31 |
| 58 | Cetacean              | 0.31 |
| 59 | Condor Andean         | 0.31 |
| 60 | Dog African Wild      | 0.31 |
| 61 | Elephant Asian        | 0.31 |
| 62 | Felids                | 0.31 |
| 63 | Fish Coral Reef       | 0.31 |
| 64 | Flamingo              | 0.31 |
| 65 | Frog                  | 0.31 |
| 66 | Goat Domestic         | 0.31 |
| 67 | Salamander Hellbender | 0.31 |
| 68 | Aquatic Invertebrates | 0.31 |
| 69 | Kangaroo              | 0.31 |
| 70 | Lemur                 | 0.31 |
| 71 | Leopard Amur          | 0.31 |
| 72 | Moose                 | 0.31 |
| 73 | Moth                  | 0.31 |
| 74 | Penguin Magellanic    | 0.31 |
| 75 | Seal                  | 0.31 |
| 76 | Seal Harbor           | 0.31 |
| 77 | Tamarin               | 0.31 |
| 78 | Turtle                | 0.31 |
| 79 | Wolf                  | 0.31 |
| 80 | Antelope              | 0.15 |
| 81 | Arachnid              | 0.15 |
| 82 | Bear Sloth            | 0.15 |
| 83 | Beetle                | 0.15 |
| 84 | Bird Of Prey          | 0.15 |
| 85 | Bongo                 | 0.15 |
| 86 | Budgerigar            | 0.15 |
| 87 | Butterfly             | 0.15 |
| 88 | Callitrichids         | 0.15 |
| 89 | Carnivore Large       | 0.15 |
| 90 | Cat                   | 0.15 |
| 91 | Cephalopods           | 0.15 |
| 92 | Chicken Prairie       | 0.15 |

|     |                          |      |
|-----|--------------------------|------|
| 93  | Buffalo Cape             | 0.04 |
| 94  | Buffalo Water            | 0.04 |
| 95  | Bull                     | 0.04 |
| 96  | Capybara                 | 0.04 |
| 97  | Cat Small                | 0.04 |
| 98  | Chamois                  | 0.04 |
| 99  | Cobra                    | 0.04 |
| 100 | Cuttlefish               | 0.04 |
| 101 | Devil Tasmanian          | 0.04 |
| 102 | Donkey                   | 0.04 |
| 103 | Eagle African            | 0.04 |
| 104 | Elephant African         | 0.04 |
| 105 | Fish Seahorse            | 0.04 |
| 106 | Fox Red                  | 0.04 |
| 107 | Gazelle                  | 0.04 |
| 108 | Giant Turtle             | 0.04 |
| 109 | Gibbon                   | 0.04 |
| 110 | Gorilla Western Lowland  | 0.04 |
| 111 | Ibex                     | 0.04 |
| 112 | Insects                  | 0.04 |
| 113 | Jelly Fish               | 0.04 |
| 114 | Killer Whale             | 0.04 |
| 115 | Kiwi                     | 0.04 |
| 116 | Koala Bear               | 0.04 |
| 117 | Ladybird                 | 0.04 |
| 118 | Large Cats               | 0.04 |
| 119 | Lemur                    | 0.04 |
| 120 | Lion Fish                | 0.04 |
| 121 | Mammal                   | 0.04 |
| 122 | Mammals Native Nocturnal | 0.04 |
| 123 | Manatee                  | 0.04 |
| 124 | Marsupial                | 0.04 |
| 125 | Monkey Howler            | 0.04 |
| 126 | Moose                    | 0.04 |
| 127 | Mule                     | 0.04 |
| 128 | Octopus                  | 0.04 |
| 129 | Okapi                    | 0.04 |
| 130 | Pangolin                 | 0.04 |
| 131 | Parakeet                 | 0.04 |
| 132 | Platypus                 | 0.04 |
| 133 | Porpoise                 | 0.04 |
| 134 | Quail                    | 0.04 |
| 135 | Quoll                    | 0.04 |
| 136 | Rabbit                   | 0.04 |
| 137 | Raptor                   | 0.04 |
| 138 | Rhinoceros White         | 0.04 |
| 139 | Scorpion                 | 0.04 |
| 140 | Shark Great White        | 0.04 |

|     |                                 |      |
|-----|---------------------------------|------|
| 93  | Coral                           | 0.15 |
| 94  | Crocodile                       | 0.15 |
| 95  | Deer                            | 0.15 |
| 96  | Dolphin Indo-Pacific Bottlenose | 0.15 |
| 97  | Elephant African                | 0.15 |
| 98  | Fish                            | 0.15 |
| 99  | Fish Large                      | 0.15 |
| 100 | Fish Pacu                       | 0.15 |
| 101 | Fish Saw                        | 0.15 |
| 102 | Fish Sea Dragon                 | 0.15 |
| 103 | Gibbon White Handed             | 0.15 |
| 104 | Hippopotamus Pygmy              | 0.15 |
| 105 | Hoofstock                       | 0.15 |
| 106 | Hummingbird                     | 0.15 |
| 107 | Hyena                           | 0.15 |
| 108 | Insects                         | 0.15 |
| 109 | Langur Francois                 | 0.15 |
| 110 | Lemur Brown                     | 0.15 |
| 111 | Lemur Collared Brown            | 0.15 |
| 112 | Lemur Mongoose                  | 0.15 |
| 113 | Lemur Red Ruffed                | 0.15 |
| 114 | Lemur Ring-Tailed               | 0.15 |
| 115 | Leopard                         | 0.15 |
| 116 | Lesser Primates                 | 0.15 |
| 117 | Lorikeets                       | 0.15 |
| 118 | Macaw                           | 0.15 |
| 119 | Manatee                         | 0.15 |
| 120 | Marmoset                        | 0.15 |
| 121 | Monkey Capuchin White Face      | 0.15 |
| 122 | Monkey Howler                   | 0.15 |
| 123 | Octopus                         | 0.15 |
| 124 | Okapi                           | 0.15 |
| 125 | Owl Screech                     | 0.15 |
| 126 | Parrot Thick Billed             | 0.15 |
| 127 | Passerines                      | 0.15 |
| 128 | Peccary                         | 0.15 |
| 129 | Penguin Humboldt                | 0.15 |
| 130 | Pig                             | 0.15 |
| 131 | Pinniped Endangered             | 0.15 |
| 132 | Porcupine North American        | 0.15 |
| 133 | Primate Nocturnal               | 0.15 |
| 134 | Primate Small                   | 0.15 |
| 135 | Primates New World              | 0.15 |
| 136 | Primates Old World              | 0.15 |
| 137 | Python                          | 0.15 |
| 138 | Ray Eagle                       | 0.15 |
| 139 | Ray Manta                       | 0.15 |
| 140 | Rhinoceros Asian                | 0.15 |

|     |                         |      |
|-----|-------------------------|------|
| 141 | Snail                   | 0.04 |
| 142 | Snake Large Constrictor | 0.04 |
| 143 | Spider                  | 0.04 |
| 144 | Toad                    | 0.04 |
| 145 | Toucan                  | 0.04 |
| 146 | Tuna                    | 0.04 |
| 147 | Turtle Sea              | 0.04 |
| 148 | Vulture                 | 0.04 |
| 149 | Wombat                  | 0.04 |

|     |                               |      |
|-----|-------------------------------|------|
| 141 | Seals/Sea Lions               | 0.15 |
| 142 | Shark Bamboo                  | 0.15 |
| 143 | Shark Hammerhead              | 0.15 |
| 144 | Shark Large                   | 0.15 |
| 145 | Shark Sandbar                 | 0.15 |
| 146 | Shark Zebra                   | 0.15 |
| 147 | Sheep                         | 0.15 |
| 148 | Siamang                       | 0.15 |
| 149 | Snake                         | 0.15 |
| 150 | Snake Diamondback Rattlesnake | 0.15 |
| 151 | Spoonbill Roseate             | 0.15 |
| 152 | Squirrel Ground               | 0.15 |
| 153 | Starfish                      | 0.15 |
| 154 | Stingray Atlantic             | 0.15 |
| 155 | Swan Trumpeter                | 0.15 |
| 156 | Teleosts                      | 0.15 |
| 157 | Tiger Sumatran                | 0.15 |
| 158 | Tortoise Giant                | 0.15 |
| 159 | Turtle Green Sea              | 0.15 |
| 160 | Wallaby                       | 0.15 |
| 161 | Whale Beluga                  | 0.15 |
| 162 | Wolf Maned                    | 0.15 |
